# Supplementary material
Source: publisher figshare collection journal article supplement (https://acs.figshare.com/ndownloader/files/7735450)
Supplement: Supplementary file 1 [file 7735450]

data_p16282_a
_audit_creation_date              2016-09-08
_audit_creation_method
;
Olex2 1.2
(compiled 2016.02.19 svn.r3266 for OlexSys, GUI svn.r5155)
;
_publ_contact_author_address      
;
Beckman Institute
Caltech 139-74
Pasadena CA 91125
USA
;
_publ_contact_author_email        xray@caltech.edu
_publ_contact_author_name         'Sarah E. Reisman'
_publ_contact_author_phone        ?
_publ_section_references
;
Dolomanov, O.V., Bourhis, L.J., Gildea, R.J, Howard, J.A.K. & Puschmann, H.
 (2009), J. Appl. Cryst. 42, 339-341.

Sheldrick, G.M. (2008). Acta Cryst. A64, 112-122.

Sheldrick, G.M. (2015). Acta Cryst. A71, 3-8.
;
_chemical_name_common             CX-10-028
_chemical_name_systematic         CX-10-028
_chemical_formula_moiety          'C42 H48 B N O10'
_chemical_formula_sum             'C42 H48 B N O10'
_chemical_formula_weight          737.62
_chemical_absolute_configuration  ad
_chemical_melting_point           ?
loop_
  _atom_type_symbol
  _atom_type_description
  _atom_type_scat_dispersion_real
  _atom_type_scat_dispersion_imag
  _atom_type_scat_source
 'C' 'C' 0.0181 0.0091 'International Tables Vol C Tables 4.2.6.8 and 6.1.1.4'
 'H' 'H' 0.0000 0.0000 'International Tables Vol C Tables 4.2.6.8 and 6.1.1.4'
 'B' 'B' 0.0090 0.0039 'International Tables Vol C Tables 4.2.6.8 and 6.1.1.4'
 'N' 'N' 0.0311 0.0180 'International Tables Vol C Tables 4.2.6.8 and 6.1.1.4'
 'O' 'O' 0.0492 0.0322 'International Tables Vol C Tables 4.2.6.8 and 6.1.1.4'

_shelx_space_group_comment
;
The symmetry employed for this shelxl refinement is uniquely defined
by the following loop, which should always be used as a source of
symmetry information in preference to the above space-group names.
They are only intended as comments.
;
_space_group_crystal_system       'monoclinic'
_space_group_IT_number            4
_space_group_name_H-M_alt         'P 1 21 1'
_space_group_name_Hall            'P 2yb'
loop_
  _space_group_symop_operation_xyz
 'x, y, z'
 '-x, y+1/2, -z'

_cell_length_a                    8.7826(4)
_cell_length_b                    22.1496(10)
_cell_length_c                    10.3099(5)
_cell_angle_alpha                 90
_cell_angle_beta                  109.928(2)
_cell_angle_gamma                 90
_cell_volume                      1885.50(15)
_cell_formula_units_Z             2
_cell_measurement_reflns_used     9806
_cell_measurement_temperature     100
_cell_measurement_theta_max       78.65
_cell_measurement_theta_min       3.99
_shelx_estimated_absorpt_T_max    0.938
_shelx_estimated_absorpt_T_min    0.774
_exptl_absorpt_coefficient_mu     0.749
_exptl_absorpt_correction_T_max   0.7542
_exptl_absorpt_correction_T_min   0.6245
_exptl_absorpt_correction_type    multi-scan
_exptl_absorpt_process_details    'SADABS-2014/5 (Sheldrick, 2014)'
_exptl_absorpt_special_details    ?
_exptl_crystal_colour             'clear colourless'
_exptl_crystal_colour_lustre      clear
_exptl_crystal_colour_primary     colourless
_exptl_crystal_density_diffrn     1.299
_exptl_crystal_density_meas       ?
_exptl_crystal_density_method     'not measured'
_exptl_crystal_description        Plate
_exptl_crystal_F_000              784
_exptl_crystal_preparation        ?
_exptl_crystal_size_max           0.36
_exptl_crystal_size_mid           0.25
_exptl_crystal_size_min           0.09
_exptl_transmission_factor_max    ?
_exptl_transmission_factor_min    ?
_diffrn_reflns_av_R_equivalents   0.0483
_diffrn_reflns_av_unetI/netI      0.0370
_diffrn_reflns_Laue_measured_fraction_full 0.999
_diffrn_reflns_Laue_measured_fraction_max 0.995
_diffrn_reflns_limit_h_max        11
_diffrn_reflns_limit_h_min        -11
_diffrn_reflns_limit_k_max        28
_diffrn_reflns_limit_k_min        -28
_diffrn_reflns_limit_l_max        13
_diffrn_reflns_limit_l_min        -12
_diffrn_reflns_number             32011
_diffrn_reflns_point_group_measured_fraction_full 0.997
_diffrn_reflns_point_group_measured_fraction_max 0.980
_diffrn_reflns_theta_full         67.679
_diffrn_reflns_theta_max          79.080
_diffrn_reflns_theta_min          3.991
_diffrn_ambient_temperature       100
_diffrn_detector                  'CMOS Area Detector'
_diffrn_detector_area_resol_mean  10.24
_diffrn_detector_type             'Bruker PHOTON 100 CMOS'
_diffrn_measured_fraction_theta_full 0.999
_diffrn_measured_fraction_theta_max 0.995
_diffrn_measurement_device        '\k-geometry diffractometer'
_diffrn_measurement_device_type   'Bruker D8 VENTURE Kappa Duo PHOTON 100 CMOS'
_diffrn_measurement_method        '\f and \w scans'
_diffrn_radiation_monochromator   'multilayer mirrors'
_diffrn_radiation_type            CuK\a
_diffrn_radiation_wavelength      1.54178
_diffrn_source                    'I\mS HB micro-focus sealed tube'
_diffrn_source_current            1
_diffrn_source_power              0.05
_diffrn_source_type               'Incoatech I\mS HB'
_diffrn_source_voltage            50
_diffrn_standards_number          0
_reflns_Friedel_coverage          0.918
_reflns_Friedel_fraction_full     0.995
_reflns_Friedel_fraction_max      0.963
_reflns_number_gt                 7609
_reflns_number_total              7996
_reflns_special_details
;
 Reflections were merged by SHELXL according to the crystal
 class for the calculation of statistics and refinement.
 
 _reflns_Friedel_fraction is defined as the number of unique
 Friedel pairs measured divided by the number that would be
 possible theoretically, ignoring centric projections and
 systematic absences.
;
_reflns_threshold_expression      'I > 2\s(I)'
_computing_cell_refinement        'SAINT v8.34A (Bruker-AXS, 2007)'
_computing_data_collection        'APEX2 v2014.11-0 (Bruker-AXS, 2014)'
_computing_data_reduction         'SAINT v8.34A (Bruker-AXS, 2007)'
_computing_molecular_graphics     ?
_computing_publication_material   ?
_computing_structure_refinement   'SHELXL-2014/7 (Sheldrick, 2014)'
_computing_structure_solution     'SHELXS-2013/1 (She ldrick, 2013)'
_refine_diff_density_max          0.196
_refine_diff_density_min          -0.192
_refine_diff_density_rms          0.038
_refine_ls_abs_structure_details
;
 Flack x determined using 3460 quotients [(I+)-(I-)]/[(I+)+(I-)]
 (Parsons, Flack and Wagner, Acta Cryst. B69 (2013) 249-259).
;
_refine_ls_abs_structure_Flack    0.12(5)
_refine_ls_extinction_coef        0.00071(18)
_refine_ls_extinction_expression  'Fc^*^=kFc[1+0.001xFc^2^\l^3^/sin(2\q)]^-1/4^'
_refine_ls_extinction_method      'SHELXL-2014/7 (Sheldrick 2014'
_refine_ls_goodness_of_fit_ref    1.047
_refine_ls_hydrogen_treatment     mixed
_refine_ls_matrix_type            full
_refine_ls_number_parameters      496
_refine_ls_number_reflns          7996
_refine_ls_number_restraints      1
_refine_ls_R_factor_all           0.0338
_refine_ls_R_factor_gt            0.0311
_refine_ls_restrained_S_all       1.047
_refine_ls_shift/su_max           0.000
_refine_ls_shift/su_mean          0.000
_refine_ls_structure_factor_coef  Fsqd
_refine_ls_weighting_details
'w=1/[\s^2^(Fo^2^)+(0.0361P)^2^+0.2542P] where P=(Fo^2^+2Fc^2^)/3'
_refine_ls_weighting_scheme       calc
_refine_ls_wR_factor_gt           0.0732
_refine_ls_wR_factor_ref          0.0747
_refine_special_details
;
 Refinement of F^2^ against ALL reflections.  The weighted R-factor wR and 
 goodness of fit S are based on F^2^, conventional R-factors R are based 
 on F, with F set to zero for negative F^2^. The threshold expression of 
 F^2^ > 2sigma(F^2^) is used only for calculating R-factors(gt) etc. and is 
 not relevant to the choice of reflections for refinement.  R-factors based 
 on F^2^ are statistically about twice as large as those based on F, and R- 
 factors based on ALL data will be even larger. 
;
_olex2_refinement_description
;
1. Fixed Uiso
 At 1.2 times of:
  All C(H) groups, {H17A,H17B,H1} of C17, All C(H,H) groups
 At 1.5 times of:
  {H16A,H16B,H16C} of C16, {H26A,H26B,H26C} of C26, {H20A,H20B,H20C} of C20,
  {H19A,H19B,H19C} of C19, {H18A,H18B,H18C} of C18
2.a Ternary CH refined with riding coordinates:
 C3(H3), C10(H10), C9(H9)
2.b Secondary CH2 refined with riding coordinates:
 C35(H35A,H35B), C27(H27A,H27B), C14(H14A,H14B), C36(H36A,H36B), C8(H8A,H8B),
 C7(H7A,H7B), C28(H28A,H28B)
2.c Aromatic/amide H refined with riding coordinates:
 C38(H38), C42(H42), C25(H25), C24(H24), C23(H23), C34(H34), C41(H41),
 C39(H39), C40(H40), C32(H32), C30(H30), C33(H33), C31(H31)
2.d X=CH2 refined with riding coordinates:
 C17(H17A,H17B)
2.e Idealised Me refined as rotating group:
 C20(H20A,H20B,H20C), C19(H19A,H19B,H19C), C16(H16A,H16B,H16C), C26(H26A,H26B,
 H26C), C18(H18A,H18B,H18C)
;
_atom_sites_solution_hydrogens    mixed
_atom_sites_solution_primary      direct
_atom_sites_solution_secondary    difmap
loop_
  _atom_site_label
  _atom_site_type_symbol
  _atom_site_fract_x
  _atom_site_fract_y
  _atom_site_fract_z
  _atom_site_U_iso_or_equiv
  _atom_site_adp_type
  _atom_site_occupancy
  _atom_site_site_symmetry_order
  _atom_site_calc_flag
  _atom_site_refinement_flags_posn
  _atom_site_refinement_flags_adp
  _atom_site_refinement_flags_occupancy
  _atom_site_disorder_assembly
  _atom_site_disorder_group
 O1 O 0.42688(17) 0.42719(6) 0.51220(14) 0.0147(3) Uani 1 1 d . . . . .
 O8 O 0.39297(17) 0.46371(6) 0.08369(14) 0.0138(3) Uani 1 1 d . . . . .
 O6 O 0.76858(16) 0.44690(6) 0.60086(14) 0.0143(3) Uani 1 1 d . . . . .
 O3 O 0.10299(17) 0.36104(6) 0.09571(14) 0.0151(3) Uani 1 1 d . . . . .
 O7 O 0.47402(16) 0.54799(6) 0.28915(14) 0.0142(3) Uani 1 1 d . . . . .
 O5 O 0.62998(16) 0.43826(7) 0.25745(14) 0.0147(3) Uani 1 1 d . . . . .
 O10 O 0.54580(18) 0.63221(7) 0.19832(15) 0.0180(3) Uani 1 1 d . . . . .
 O9 O 0.98935(17) 0.49556(7) 0.56475(15) 0.0166(3) Uani 1 1 d . . . . .
 O2 O 0.22140(18) 0.37562(7) 0.53040(16) 0.0208(3) Uani 1 1 d . . . . .
 O4 O 0.05582(18) 0.39842(7) -0.11879(16) 0.0193(3) Uani 1 1 d . . . . .
 N1 N -0.2788(2) 0.37428(8) -0.17945(19) 0.0176(3) Uani 1 1 d . . . . .
 C37 C 1.1582(2) 0.57036(10) 0.7162(2) 0.0163(4) Uani 1 1 d . . . . .
 C15 C 0.2690(2) 0.41055(9) 0.4630(2) 0.0157(4) Uani 1 1 d . . . . .
 C21 C 0.0070(2) 0.37518(9) -0.0339(2) 0.0140(4) Uani 1 1 d . . . . .
 C1 C 0.4991(2) 0.35290(9) 0.3321(2) 0.0146(4) Uani 1 1 d . . . . .
 C5 C 0.2420(2) 0.47545(9) 0.2452(2) 0.0134(4) Uani 1 1 d . . . . .
 C22 C -0.1605(3) 0.35901(9) -0.0573(2) 0.0166(4) Uani 1 1 d . . . . .
 C35 C 0.9016(2) 0.44158(9) 0.5521(2) 0.0155(4) Uani 1 1 d . . . . .
 H35A H 0.9753 0.4095 0.6049 0.019 Uiso 1 1 calc R . . . .
 H35B H 0.8606 0.4293 0.4540 0.019 Uiso 1 1 calc R . . . .
 C27 C 0.4166(3) 0.60417(10) 0.2233(2) 0.0165(4) Uani 1 1 d . . . . .
 H27A H 0.3266 0.5974 0.1355 0.020 Uiso 1 1 calc R . . . .
 H27B H 0.3767 0.6298 0.2836 0.020 Uiso 1 1 calc R . . . .
 C14 C 0.1598(2) 0.43959(10) 0.3318(2) 0.0154(4) Uani 1 1 d . . . . .
 H14A H 0.0853 0.4672 0.3562 0.019 Uiso 1 1 calc R . . . .
 H14B H 0.0929 0.4075 0.2725 0.019 Uiso 1 1 calc R . . . .
 C6 C 0.3777(2) 0.51352(9) 0.3516(2) 0.0130(4) Uani 1 1 d . . . . .
 C36 C 1.1048(2) 0.50543(10) 0.6992(2) 0.0175(4) Uani 1 1 d . . . . .
 H36A H 1.1999 0.4790 0.7131 0.021 Uiso 1 1 calc R . . . .
 H36B H 1.0559 0.4949 0.7697 0.021 Uiso 1 1 calc R . . . .
 C2 C 0.3682(2) 0.32730(9) 0.2411(2) 0.0150(4) Uani 1 1 d . . . . .
 C8 C 0.4796(3) 0.57792(9) 0.5636(2) 0.0165(4) Uani 1 1 d . . . . .
 H8A H 0.4465 0.5997 0.6336 0.020 Uiso 1 1 calc R . . . .
 H8B H 0.5316 0.6074 0.5199 0.020 Uiso 1 1 calc R . . . .
 C3 C 0.2751(2) 0.37046(9) 0.12813(19) 0.0138(4) Uani 1 1 d . . . . .
 H3 H 0.3034 0.3620 0.0438 0.017 Uiso 1 1 calc R . . . .
 C20 C 0.7513(3) 0.55729(10) 0.7432(2) 0.0191(4) Uani 1 1 d . . . . .
 H20A H 0.8081 0.5829 0.6968 0.029 Uiso 1 1 calc GR . . . .
 H20B H 0.8243 0.5254 0.7947 0.029 Uiso 1 1 calc GR . . . .
 H20C H 0.7165 0.5819 0.8070 0.029 Uiso 1 1 calc GR . . . .
 C19 C 0.1125(2) 0.51071(9) 0.1339(2) 0.0169(4) Uani 1 1 d . . . . .
 H19A H 0.0216 0.4839 0.0871 0.025 Uiso 1 1 calc GR . . . .
 H19B H 0.1587 0.5266 0.0666 0.025 Uiso 1 1 calc GR . . . .
 H19C H 0.0742 0.5443 0.1764 0.025 Uiso 1 1 calc GR . . . .
 C10 C 0.6507(2) 0.49118(9) 0.52907(19) 0.0129(4) Uani 1 1 d . . . . .
 H10 H 0.6999 0.5186 0.4771 0.015 Uiso 1 1 calc R . . . .
 C7 C 0.3289(2) 0.55223(9) 0.4538(2) 0.0154(4) Uani 1 1 d . . . . .
 H7A H 0.2583 0.5857 0.4040 0.018 Uiso 1 1 calc R . . . .
 H7B H 0.2670 0.5274 0.4985 0.018 Uiso 1 1 calc R . . . .
 C38 C 1.2792(3) 0.58727(10) 0.8377(2) 0.0208(4) Uani 1 1 d . . . . .
 H38 H 1.3256 0.5578 0.9070 0.025 Uiso 1 1 calc R . . . .
 C12 C 0.5033(2) 0.42036(9) 0.30738(19) 0.0130(4) Uani 1 1 d . . . . .
 C29 C 0.7961(3) 0.68667(10) 0.2829(2) 0.0201(4) Uani 1 1 d . . . . .
 C42 C 1.0907(3) 0.61411(10) 0.6156(2) 0.0189(4) Uani 1 1 d . . . . .
 H42 H 1.0071 0.6033 0.5323 0.023 Uiso 1 1 calc R . . . .
 C4 C 0.3422(2) 0.43323(9) 0.18465(19) 0.0127(4) Uani 1 1 d . . . . .
 C25 C -0.4231(3) 0.35260(11) -0.1792(2) 0.0240(5) Uani 1 1 d . . . . .
 H25 H -0.5242 0.3571 -0.2514 0.029 Uiso 1 1 calc R . . . .
 C13 C 0.3129(3) 0.26380(10) 0.2364(2) 0.0204(4) Uani 1 1 d . . . . .
 C11 C 0.4967(2) 0.46260(9) 0.4270(2) 0.0125(4) Uani 1 1 d . . . . .
 C16 C 0.6322(3) 0.32153(10) 0.4424(2) 0.0202(4) Uani 1 1 d . . . . .
 H16A H 0.6328 0.3349 0.5332 0.030 Uiso 1 1 calc GR . . . .
 H16B H 0.7364 0.3313 0.4323 0.030 Uiso 1 1 calc GR . . . .
 H16C H 0.6147 0.2778 0.4340 0.030 Uiso 1 1 calc GR . . . .
 C9 C 0.6035(2) 0.52887(9) 0.6358(2) 0.0156(4) Uani 1 1 d . . . . .
 H9 H 0.5514 0.5012 0.6849 0.019 Uiso 1 1 calc R . . . .
 C24 C -0.3977(3) 0.32283(13) -0.0559(3) 0.0310(5) Uani 1 1 d . . . . .
 H24 H -0.4779 0.3031 -0.0284 0.037 Uiso 1 1 calc R . . . .
 C23 C -0.2321(3) 0.32695(12) 0.0214(2) 0.0245(5) Uani 1 1 d . . . . .
 H23 H -0.1792 0.3107 0.1108 0.029 Uiso 1 1 calc R . . . .
 C34 C 0.8846(3) 0.65114(10) 0.2235(3) 0.0249(5) Uani 1 1 d . . . . .
 H34 H 0.8541 0.6103 0.2013 0.030 Uiso 1 1 calc R . . . .
 C26 C 0.6583(3) 0.49486(11) 0.0473(2) 0.0215(4) Uani 1 1 d . . . . .
 H26A H 0.6301 0.4753 -0.0431 0.032 Uiso 1 1 calc GR . . . .
 H26B H 0.7742 0.4896 0.0979 0.032 Uiso 1 1 calc GR . . . .
 H26C H 0.6332 0.5380 0.0349 0.032 Uiso 1 1 calc GR . . . .
 C28 C 0.6575(3) 0.66018(11) 0.3179(2) 0.0236(5) Uani 1 1 d . . . . .
 H28A H 0.6988 0.6299 0.3923 0.028 Uiso 1 1 calc R . . . .
 H28B H 0.6019 0.6924 0.3513 0.028 Uiso 1 1 calc R . . . .
 C41 C 1.1455(3) 0.67353(11) 0.6368(2) 0.0230(4) Uani 1 1 d . . . . .
 H41 H 1.0997 0.7030 0.5675 0.028 Uiso 1 1 calc R . . . .
 C39 C 1.3334(3) 0.64665(11) 0.8595(2) 0.0262(5) Uani 1 1 d . . . . .
 H39 H 1.4159 0.6576 0.9431 0.031 Uiso 1 1 calc R . . . .
 C40 C 1.2663(3) 0.68995(11) 0.7583(2) 0.0254(5) Uani 1 1 d . . . . .
 H40 H 1.3032 0.7306 0.7725 0.030 Uiso 1 1 calc R . . . .
 C32 C 1.0651(3) 0.73388(12) 0.2318(3) 0.0298(5) Uani 1 1 d . . . . .
 H32 H 1.1580 0.7497 0.2162 0.036 Uiso 1 1 calc R . . . .
 C30 C 0.8427(3) 0.74657(11) 0.3146(2) 0.0262(5) Uani 1 1 d . . . . .
 H30 H 0.7823 0.7719 0.3535 0.031 Uiso 1 1 calc R . . . .
 C33 C 1.0170(3) 0.67450(11) 0.1963(3) 0.0287(5) Uani 1 1 d . . . . .
 H33 H 1.0749 0.6500 0.1534 0.034 Uiso 1 1 calc R . . . .
 C18 C 0.2785(3) 0.23080(11) 0.1038(3) 0.0282(5) Uani 1 1 d . . . . .
 H18A H 0.1972 0.2530 0.0299 0.042 Uiso 1 1 calc GR . . . .
 H18B H 0.2375 0.1904 0.1121 0.042 Uiso 1 1 calc GR . . . .
 H18C H 0.3783 0.2273 0.0818 0.042 Uiso 1 1 calc GR . . . .
 C31 C 0.9776(3) 0.76927(12) 0.2893(2) 0.0303(5) Uani 1 1 d . . . . .
 H31 H 1.0093 0.8100 0.3123 0.036 Uiso 1 1 calc R . . . .
 B1 B 0.5590(3) 0.46571(10) 0.1305(2) 0.0152(4) Uani 1 1 d . . . . .
 C17 C 0.2881(4) 0.23960(11) 0.3459(3) 0.0324(6) Uani 1 1 d . . . . .
 H17A H 0.3059 0.2630 0.4269 0.039 Uiso 1 1 calc R . . . .
 H17B H 0.2527 0.1989 0.3429 0.039 Uiso 1 1 calc R . . . .
 H1 H -0.263(4) 0.3947(16) -0.247(4) 0.039 Uiso 1 1 d R . . . .

loop_
  _atom_site_aniso_label
  _atom_site_aniso_U_11
  _atom_site_aniso_U_22
  _atom_site_aniso_U_33
  _atom_site_aniso_U_23
  _atom_site_aniso_U_13
  _atom_site_aniso_U_12
 O1 0.0146(6) 0.0169(7) 0.0137(6) 0.0019(5) 0.0062(6) -0.0012(5)
 O8 0.0143(6) 0.0168(7) 0.0112(6) 0.0023(5) 0.0055(5) 0.0001(5)
 O6 0.0112(6) 0.0183(7) 0.0128(6) 0.0024(5) 0.0031(5) 0.0003(5)
 O3 0.0124(6) 0.0188(7) 0.0127(6) 0.0016(5) 0.0025(5) -0.0013(5)
 O7 0.0137(6) 0.0146(7) 0.0151(7) 0.0026(5) 0.0061(6) 0.0007(5)
 O5 0.0115(6) 0.0197(7) 0.0139(6) -0.0013(5) 0.0055(5) 0.0004(5)
 O10 0.0171(7) 0.0205(7) 0.0150(7) 0.0014(5) 0.0037(6) -0.0042(6)
 O9 0.0142(7) 0.0198(7) 0.0144(7) 0.0010(5) 0.0029(6) -0.0038(5)
 O2 0.0193(7) 0.0234(8) 0.0215(7) 0.0042(6) 0.0091(6) -0.0026(6)
 O4 0.0172(7) 0.0234(8) 0.0162(7) 0.0043(6) 0.0041(6) -0.0021(6)
 N1 0.0158(8) 0.0205(9) 0.0149(8) 0.0013(7) 0.0032(7) -0.0007(7)
 C37 0.0148(9) 0.0213(10) 0.0151(9) 0.0003(7) 0.0083(8) -0.0009(8)
 C15 0.0155(9) 0.0173(10) 0.0161(9) -0.0017(7) 0.0078(8) -0.0001(7)
 C21 0.0148(9) 0.0135(9) 0.0123(8) 0.0003(7) 0.0026(8) 0.0009(7)
 C1 0.0159(9) 0.0154(9) 0.0128(9) 0.0001(7) 0.0052(8) 0.0029(7)
 C5 0.0132(9) 0.0151(9) 0.0128(8) -0.0008(7) 0.0057(8) -0.0004(7)
 C22 0.0168(10) 0.0175(10) 0.0142(9) 0.0009(7) 0.0035(8) 0.0008(8)
 C35 0.0120(8) 0.0186(10) 0.0160(9) 0.0000(7) 0.0050(8) 0.0001(7)
 C27 0.0144(9) 0.0194(10) 0.0144(9) 0.0040(7) 0.0033(8) 0.0004(7)
 C14 0.0123(9) 0.0190(10) 0.0164(9) -0.0007(7) 0.0066(8) -0.0013(7)
 C6 0.0109(8) 0.0160(9) 0.0125(9) 0.0010(7) 0.0048(8) -0.0004(7)
 C36 0.0142(9) 0.0220(10) 0.0140(9) 0.0001(7) 0.0020(8) -0.0021(8)
 C2 0.0155(9) 0.0161(9) 0.0126(9) 0.0000(7) 0.0037(8) 0.0032(7)
 C8 0.0181(10) 0.0172(10) 0.0154(9) -0.0028(7) 0.0073(8) -0.0002(8)
 C3 0.0115(9) 0.0160(9) 0.0127(8) 0.0009(7) 0.0028(7) 0.0007(7)
 C20 0.0210(10) 0.0212(11) 0.0148(9) -0.0045(8) 0.0055(9) -0.0023(8)
 C19 0.0127(9) 0.0180(10) 0.0189(10) -0.0009(7) 0.0038(8) 0.0002(7)
 C10 0.0121(9) 0.0143(9) 0.0109(8) 0.0002(7) 0.0022(7) 0.0007(7)
 C7 0.0158(9) 0.0169(9) 0.0152(9) -0.0004(7) 0.0076(8) 0.0018(7)
 C38 0.0218(10) 0.0264(11) 0.0139(9) 0.0030(8) 0.0054(9) -0.0031(8)
 C12 0.0109(8) 0.0173(9) 0.0110(8) 0.0007(7) 0.0039(7) 0.0014(7)
 C29 0.0201(10) 0.0197(10) 0.0165(9) 0.0020(8) 0.0009(9) -0.0034(8)
 C42 0.0159(10) 0.0237(11) 0.0165(10) 0.0013(8) 0.0047(8) 0.0013(8)
 C4 0.0118(8) 0.0161(9) 0.0108(8) 0.0011(7) 0.0044(7) -0.0001(7)
 C25 0.0147(10) 0.0315(12) 0.0221(11) 0.0044(9) 0.0017(9) -0.0003(9)
 C13 0.0187(10) 0.0168(10) 0.0201(10) 0.0009(8) -0.0007(8) 0.0017(8)
 C11 0.0127(8) 0.0152(9) 0.0103(8) 0.0012(7) 0.0050(7) -0.0004(7)
 C16 0.0193(10) 0.0188(10) 0.0168(9) -0.0015(8) -0.0013(8) 0.0039(8)
 C9 0.0176(9) 0.0177(9) 0.0119(9) -0.0019(7) 0.0056(8) -0.0030(8)
 C24 0.0182(11) 0.0432(15) 0.0312(12) 0.0122(11) 0.0081(10) -0.0051(10)
 C23 0.0188(10) 0.0345(13) 0.0199(10) 0.0095(9) 0.0062(9) -0.0003(9)
 C34 0.0227(11) 0.0161(10) 0.0346(13) 0.0039(9) 0.0080(10) 0.0000(8)
 C26 0.0177(10) 0.0273(11) 0.0200(10) 0.0015(9) 0.0071(9) -0.0011(8)
 C28 0.0240(11) 0.0279(12) 0.0186(10) -0.0048(8) 0.0067(9) -0.0062(9)
 C41 0.0245(11) 0.0220(11) 0.0233(11) 0.0050(8) 0.0090(9) 0.0027(9)
 C39 0.0303(12) 0.0292(12) 0.0169(10) -0.0029(9) 0.0052(10) -0.0102(10)
 C40 0.0337(13) 0.0186(11) 0.0258(11) -0.0041(8) 0.0127(11) -0.0038(9)
 C32 0.0205(11) 0.0308(13) 0.0320(12) 0.0096(10) 0.0011(10) -0.0079(10)
 C30 0.0369(13) 0.0216(11) 0.0175(10) -0.0018(8) 0.0061(10) -0.0036(9)
 C33 0.0204(11) 0.0262(12) 0.0392(13) 0.0073(10) 0.0097(10) 0.0042(9)
 C18 0.0348(13) 0.0194(11) 0.0245(11) -0.0016(9) 0.0024(10) 0.0002(9)
 C31 0.0395(13) 0.0225(11) 0.0234(11) -0.0001(9) 0.0036(11) -0.0129(11)
 B1 0.0150(10) 0.0174(10) 0.0135(10) -0.0038(8) 0.0052(9) 0.0000(8)
 C17 0.0484(15) 0.0199(11) 0.0292(12) 0.0019(9) 0.0135(12) -0.0070(11)

_geom_special_details
;
 All esds (except the esd in the dihedral angle between two l.s. planes)
 are estimated using the full covariance matrix.  The cell esds are taken
 into account individually in the estimation of esds in distances, angles
 and torsion angles; correlations between esds in cell parameters are only
 used when they are defined by crystal symmetry.  An approximate (isotropic)
 treatment of cell esds is used for estimating esds involving l.s. planes.
;
loop_
  _geom_bond_atom_site_label_1
  _geom_bond_atom_site_label_2
  _geom_bond_distance
  _geom_bond_site_symmetry_2
  _geom_bond_publ_flag
 O1 C15 1.355(3) . ?
 O1 C11 1.459(2) . ?
 O8 C4 1.433(2) . ?
 O8 B1 1.371(3) . ?
 O6 C35 1.426(2) . ?
 O6 C10 1.435(2) . ?
 O3 C21 1.351(2) . ?
 O3 C3 1.448(2) . ?
 O7 C27 1.424(2) . ?
 O7 C6 1.444(2) . ?
 O5 C12 1.432(2) . ?
 O5 B1 1.384(3) . ?
 O10 C27 1.392(3) . ?
 O10 C28 1.429(3) . ?
 O9 C35 1.404(2) . ?
 O9 C36 1.428(2) . ?
 O2 C15 1.206(3) . ?
 O4 C21 1.212(3) . ?
 N1 C22 1.374(3) . ?
 N1 C25 1.356(3) . ?
 N1 H1 0.89(4) . ?
 C37 C36 1.504(3) . ?
 C37 C38 1.390(3) . ?
 C37 C42 1.396(3) . ?
 C15 C14 1.510(3) . ?
 C21 C22 1.453(3) . ?
 C1 C2 1.337(3) . ?
 C1 C12 1.519(3) . ?
 C1 C16 1.495(3) . ?
 C5 C14 1.545(3) . ?
 C5 C6 1.564(3) . ?
 C5 C19 1.526(3) . ?
 C5 C4 1.554(3) . ?
 C22 C23 1.380(3) . ?
 C35 H35A 0.9900 . ?
 C35 H35B 0.9900 . ?
 C27 H27A 0.9900 . ?
 C27 H27B 0.9900 . ?
 C14 H14A 0.9900 . ?
 C14 H14B 0.9900 . ?
 C6 C7 1.529(3) . ?
 C6 C11 1.554(3) . ?
 C36 H36A 0.9900 . ?
 C36 H36B 0.9900 . ?
 C2 C3 1.513(3) . ?
 C2 C13 1.483(3) . ?
 C8 H8A 0.9900 . ?
 C8 H8B 0.9900 . ?
 C8 C7 1.528(3) . ?
 C8 C9 1.539(3) . ?
 C3 H3 1.0000 . ?
 C3 C4 1.545(3) . ?
 C20 H20A 0.9800 . ?
 C20 H20B 0.9800 . ?
 C20 H20C 0.9800 . ?
 C20 C9 1.526(3) . ?
 C19 H19A 0.9800 . ?
 C19 H19B 0.9800 . ?
 C19 H19C 0.9800 . ?
 C10 H10 1.0000 . ?
 C10 C11 1.538(3) . ?
 C10 C9 1.546(3) . ?
 C7 H7A 0.9900 . ?
 C7 H7B 0.9900 . ?
 C38 H38 0.9500 . ?
 C38 C39 1.391(3) . ?
 C12 C4 1.569(3) . ?
 C12 C11 1.565(3) . ?
 C29 C34 1.386(3) . ?
 C29 C28 1.502(3) . ?
 C29 C30 1.394(3) . ?
 C42 H42 0.9500 . ?
 C42 C41 1.393(3) . ?
 C25 H25 0.9500 . ?
 C25 C24 1.381(3) . ?
 C13 C18 1.488(3) . ?
 C13 C17 1.334(3) . ?
 C16 H16A 0.9800 . ?
 C16 H16B 0.9800 . ?
 C16 H16C 0.9800 . ?
 C9 H9 1.0000 . ?
 C24 H24 0.9500 . ?
 C24 C23 1.403(3) . ?
 C23 H23 0.9500 . ?
 C34 H34 0.9500 . ?
 C34 C33 1.387(3) . ?
 C26 H26A 0.9800 . ?
 C26 H26B 0.9800 . ?
 C26 H26C 0.9800 . ?
 C26 B1 1.557(3) . ?
 C28 H28A 0.9900 . ?
 C28 H28B 0.9900 . ?
 C41 H41 0.9500 . ?
 C41 C40 1.387(4) . ?
 C39 H39 0.9500 . ?
 C39 C40 1.391(4) . ?
 C40 H40 0.9500 . ?
 C32 H32 0.9500 . ?
 C32 C33 1.392(4) . ?
 C32 C31 1.367(4) . ?
 C30 H30 0.9500 . ?
 C30 C31 1.391(4) . ?
 C33 H33 0.9500 . ?
 C18 H18A 0.9800 . ?
 C18 H18B 0.9800 . ?
 C18 H18C 0.9800 . ?
 C31 H31 0.9500 . ?
 C17 H17A 0.9500 . ?
 C17 H17B 0.9500 . ?

loop_
  _geom_angle_atom_site_label_1
  _geom_angle_atom_site_label_2
  _geom_angle_atom_site_label_3
  _geom_angle
  _geom_angle_site_symmetry_1
  _geom_angle_site_symmetry_3
  _geom_angle_publ_flag
 C15 O1 C11 120.47(15) . . ?
 B1 O8 C4 108.43(16) . . ?
 C35 O6 C10 114.14(14) . . ?
 C21 O3 C3 116.42(15) . . ?
 C27 O7 C6 120.55(15) . . ?
 B1 O5 C12 107.85(15) . . ?
 C27 O10 C28 113.36(16) . . ?
 C35 O9 C36 113.94(15) . . ?
 C22 N1 H1 125(2) . . ?
 C25 N1 C22 109.02(18) . . ?
 C25 N1 H1 126(2) . . ?
 C38 C37 C36 118.36(19) . . ?
 C38 C37 C42 118.9(2) . . ?
 C42 C37 C36 122.74(19) . . ?
 O1 C15 C14 118.44(17) . . ?
 O2 C15 O1 118.05(19) . . ?
 O2 C15 C14 123.40(19) . . ?
 O3 C21 C22 111.21(17) . . ?
 O4 C21 O3 123.89(18) . . ?
 O4 C21 C22 124.90(18) . . ?
 C2 C1 C12 111.31(17) . . ?
 C2 C1 C16 126.79(19) . . ?
 C16 C1 C12 121.85(18) . . ?
 C14 C5 C6 105.43(15) . . ?
 C14 C5 C4 111.27(16) . . ?
 C19 C5 C14 108.83(16) . . ?
 C19 C5 C6 116.49(16) . . ?
 C19 C5 C4 112.64(16) . . ?
 C4 C5 C6 101.86(15) . . ?
 N1 C22 C21 119.86(18) . . ?
 N1 C22 C23 108.20(19) . . ?
 C23 C22 C21 131.89(19) . . ?
 O6 C35 H35A 109.0 . . ?
 O6 C35 H35B 109.0 . . ?
 O9 C35 O6 112.74(16) . . ?
 O9 C35 H35A 109.0 . . ?
 O9 C35 H35B 109.0 . . ?
 H35A C35 H35B 107.8 . . ?
 O7 C27 H27A 110.2 . . ?
 O7 C27 H27B 110.2 . . ?
 O10 C27 O7 107.43(16) . . ?
 O10 C27 H27A 110.2 . . ?
 O10 C27 H27B 110.2 . . ?
 H27A C27 H27B 108.5 . . ?
 C15 C14 C5 117.24(17) . . ?
 C15 C14 H14A 108.0 . . ?
 C15 C14 H14B 108.0 . . ?
 C5 C14 H14A 108.0 . . ?
 C5 C14 H14B 108.0 . . ?
 H14A C14 H14B 107.2 . . ?
 O7 C6 C5 113.25(15) . . ?
 O7 C6 C7 110.82(16) . . ?
 O7 C6 C11 102.15(14) . . ?
 C7 C6 C5 117.40(16) . . ?
 C7 C6 C11 111.16(16) . . ?
 C11 C6 C5 100.47(15) . . ?
 O9 C36 C37 110.44(17) . . ?
 O9 C36 H36A 109.6 . . ?
 O9 C36 H36B 109.6 . . ?
 C37 C36 H36A 109.6 . . ?
 C37 C36 H36B 109.6 . . ?
 H36A C36 H36B 108.1 . . ?
 C1 C2 C3 112.47(18) . . ?
 C1 C2 C13 128.21(19) . . ?
 C13 C2 C3 119.25(17) . . ?
 H8A C8 H8B 107.8 . . ?
 C7 C8 H8A 109.0 . . ?
 C7 C8 H8B 109.0 . . ?
 C7 C8 C9 112.75(17) . . ?
 C9 C8 H8A 109.0 . . ?
 C9 C8 H8B 109.0 . . ?
 O3 C3 C2 109.54(16) . . ?
 O3 C3 H3 108.7 . . ?
 O3 C3 C4 116.82(16) . . ?
 C2 C3 H3 108.7 . . ?
 C2 C3 C4 103.98(16) . . ?
 C4 C3 H3 108.7 . . ?
 H20A C20 H20B 109.5 . . ?
 H20A C20 H20C 109.5 . . ?
 H20B C20 H20C 109.5 . . ?
 C9 C20 H20A 109.5 . . ?
 C9 C20 H20B 109.5 . . ?
 C9 C20 H20C 109.5 . . ?
 C5 C19 H19A 109.5 . . ?
 C5 C19 H19B 109.5 . . ?
 C5 C19 H19C 109.5 . . ?
 H19A C19 H19B 109.5 . . ?
 H19A C19 H19C 109.5 . . ?
 H19B C19 H19C 109.5 . . ?
 O6 C10 H10 108.9 . . ?
 O6 C10 C11 112.52(16) . . ?
 O6 C10 C9 108.86(15) . . ?
 C11 C10 H10 108.9 . . ?
 C11 C10 C9 108.83(15) . . ?
 C9 C10 H10 108.9 . . ?
 C6 C7 H7A 109.6 . . ?
 C6 C7 H7B 109.6 . . ?
 C8 C7 C6 110.11(16) . . ?
 C8 C7 H7A 109.6 . . ?
 C8 C7 H7B 109.6 . . ?
 H7A C7 H7B 108.2 . . ?
 C37 C38 H38 119.5 . . ?
 C37 C38 C39 121.0(2) . . ?
 C39 C38 H38 119.5 . . ?
 O5 C12 C1 113.53(16) . . ?
 O5 C12 C4 104.90(14) . . ?
 O5 C12 C11 111.08(15) . . ?
 C1 C12 C4 104.33(16) . . ?
 C1 C12 C11 116.51(16) . . ?
 C11 C12 C4 105.18(15) . . ?
 C34 C29 C28 120.4(2) . . ?
 C34 C29 C30 118.7(2) . . ?
 C30 C29 C28 120.9(2) . . ?
 C37 C42 H42 119.9 . . ?
 C41 C42 C37 120.2(2) . . ?
 C41 C42 H42 119.9 . . ?
 O8 C4 C5 111.55(15) . . ?
 O8 C4 C3 108.85(15) . . ?
 O8 C4 C12 104.66(15) . . ?
 C5 C4 C12 105.31(15) . . ?
 C3 C4 C5 119.85(16) . . ?
 C3 C4 C12 105.30(15) . . ?
 N1 C25 H25 125.9 . . ?
 N1 C25 C24 108.3(2) . . ?
 C24 C25 H25 125.9 . . ?
 C2 C13 C18 117.23(19) . . ?
 C17 C13 C2 120.0(2) . . ?
 C17 C13 C18 122.7(2) . . ?
 O1 C11 C6 110.00(15) . . ?
 O1 C11 C10 105.15(15) . . ?
 O1 C11 C12 106.79(15) . . ?
 C6 C11 C12 103.80(15) . . ?
 C10 C11 C6 109.15(16) . . ?
 C10 C11 C12 121.70(16) . . ?
 C1 C16 H16A 109.5 . . ?
 C1 C16 H16B 109.5 . . ?
 C1 C16 H16C 109.5 . . ?
 H16A C16 H16B 109.5 . . ?
 H16A C16 H16C 109.5 . . ?
 H16B C16 H16C 109.5 . . ?
 C8 C9 C10 110.72(16) . . ?
 C8 C9 H9 108.0 . . ?
 C20 C9 C8 110.27(17) . . ?
 C20 C9 C10 111.76(17) . . ?
 C20 C9 H9 108.0 . . ?
 C10 C9 H9 108.0 . . ?
 C25 C24 H24 126.2 . . ?
 C25 C24 C23 107.6(2) . . ?
 C23 C24 H24 126.2 . . ?
 C22 C23 C24 106.9(2) . . ?
 C22 C23 H23 126.5 . . ?
 C24 C23 H23 126.5 . . ?
 C29 C34 H34 119.6 . . ?
 C29 C34 C33 120.9(2) . . ?
 C33 C34 H34 119.6 . . ?
 H26A C26 H26B 109.5 . . ?
 H26A C26 H26C 109.5 . . ?
 H26B C26 H26C 109.5 . . ?
 B1 C26 H26A 109.5 . . ?
 B1 C26 H26B 109.5 . . ?
 B1 C26 H26C 109.5 . . ?
 O10 C28 C29 109.64(18) . . ?
 O10 C28 H28A 109.7 . . ?
 O10 C28 H28B 109.7 . . ?
 C29 C28 H28A 109.7 . . ?
 C29 C28 H28B 109.7 . . ?
 H28A C28 H28B 108.2 . . ?
 C42 C41 H41 119.8 . . ?
 C40 C41 C42 120.5(2) . . ?
 C40 C41 H41 119.8 . . ?
 C38 C39 H39 120.1 . . ?
 C38 C39 C40 119.8(2) . . ?
 C40 C39 H39 120.1 . . ?
 C41 C40 C39 119.6(2) . . ?
 C41 C40 H40 120.2 . . ?
 C39 C40 H40 120.2 . . ?
 C33 C32 H32 120.3 . . ?
 C31 C32 H32 120.3 . . ?
 C31 C32 C33 119.4(2) . . ?
 C29 C30 H30 120.0 . . ?
 C31 C30 C29 120.1(2) . . ?
 C31 C30 H30 120.0 . . ?
 C34 C33 C32 120.0(2) . . ?
 C34 C33 H33 120.0 . . ?
 C32 C33 H33 120.0 . . ?
 C13 C18 H18A 109.5 . . ?
 C13 C18 H18B 109.5 . . ?
 C13 C18 H18C 109.5 . . ?
 H18A C18 H18B 109.5 . . ?
 H18A C18 H18C 109.5 . . ?
 H18B C18 H18C 109.5 . . ?
 C32 C31 C30 121.0(2) . . ?
 C32 C31 H31 119.5 . . ?
 C30 C31 H31 119.5 . . ?
 O8 B1 O5 113.65(18) . . ?
 O8 B1 C26 123.21(19) . . ?
 O5 B1 C26 123.12(19) . . ?
 C13 C17 H17A 120.0 . . ?
 C13 C17 H17B 120.0 . . ?
 H17A C17 H17B 120.0 . . ?

loop_
  _geom_torsion_atom_site_label_1
  _geom_torsion_atom_site_label_2
  _geom_torsion_atom_site_label_3
  _geom_torsion_atom_site_label_4
  _geom_torsion
  _geom_torsion_site_symmetry_1
  _geom_torsion_site_symmetry_2
  _geom_torsion_site_symmetry_3
  _geom_torsion_site_symmetry_4
  _geom_torsion_publ_flag
 O1 C15 C14 C5 13.3(3) . . . . ?
 O6 C10 C11 O1 63.33(19) . . . . ?
 O6 C10 C11 C6 -178.69(15) . . . . ?
 O6 C10 C11 C12 -57.9(2) . . . . ?
 O6 C10 C9 C8 178.83(16) . . . . ?
 O6 C10 C9 C20 55.5(2) . . . . ?
 O3 C21 C22 N1 174.79(18) . . . . ?
 O3 C21 C22 C23 -8.2(3) . . . . ?
 O3 C3 C4 O8 -111.77(17) . . . . ?
 O3 C3 C4 C5 18.3(2) . . . . ?
 O3 C3 C4 C12 136.47(16) . . . . ?
 O7 C6 C7 C8 -56.9(2) . . . . ?
 O7 C6 C11 O1 172.58(14) . . . . ?
 O7 C6 C11 C10 57.69(18) . . . . ?
 O7 C6 C11 C12 -73.47(17) . . . . ?
 O5 C12 C4 O8 -6.63(19) . . . . ?
 O5 C12 C4 C5 -124.35(16) . . . . ?
 O5 C12 C4 C3 108.07(16) . . . . ?
 O5 C12 C11 O1 -153.39(14) . . . . ?
 O5 C12 C11 C6 90.38(17) . . . . ?
 O5 C12 C11 C10 -32.9(2) . . . . ?
 O2 C15 C14 C5 -170.78(19) . . . . ?
 O4 C21 C22 N1 -5.1(3) . . . . ?
 O4 C21 C22 C23 171.9(2) . . . . ?
 N1 C22 C23 C24 0.1(3) . . . . ?
 N1 C25 C24 C23 0.3(3) . . . . ?
 C37 C38 C39 C40 -0.2(4) . . . . ?
 C37 C42 C41 C40 -0.6(3) . . . . ?
 C15 O1 C11 C6 43.1(2) . . . . ?
 C15 O1 C11 C10 160.51(16) . . . . ?
 C15 O1 C11 C12 -68.9(2) . . . . ?
 C21 O3 C3 C2 -152.69(16) . . . . ?
 C21 O3 C3 C4 89.5(2) . . . . ?
 C21 C22 C23 C24 -177.2(2) . . . . ?
 C1 C2 C3 O3 -140.85(17) . . . . ?
 C1 C2 C3 C4 -15.3(2) . . . . ?
 C1 C2 C13 C18 -127.7(2) . . . . ?
 C1 C2 C13 C17 55.7(3) . . . . ?
 C1 C12 C4 O8 -126.25(16) . . . . ?
 C1 C12 C4 C5 116.02(16) . . . . ?
 C1 C12 C4 C3 -11.55(19) . . . . ?
 C1 C12 C11 O1 -21.3(2) . . . . ?
 C1 C12 C11 C6 -137.54(17) . . . . ?
 C1 C12 C11 C10 99.2(2) . . . . ?
 C5 C6 C7 C8 170.86(16) . . . . ?
 C5 C6 C11 O1 -70.65(18) . . . . ?
 C5 C6 C11 C10 174.45(15) . . . . ?
 C5 C6 C11 C12 43.30(17) . . . . ?
 C22 N1 C25 C24 -0.3(3) . . . . ?
 C35 O6 C10 C11 103.96(18) . . . . ?
 C35 O6 C10 C9 -135.33(16) . . . . ?
 C35 O9 C36 C37 -163.82(16) . . . . ?
 C27 O7 C6 C5 80.9(2) . . . . ?
 C27 O7 C6 C7 -53.5(2) . . . . ?
 C27 O7 C6 C11 -171.96(16) . . . . ?
 C27 O10 C28 C29 177.42(18) . . . . ?
 C14 C5 C6 O7 176.94(15) . . . . ?
 C14 C5 C6 C7 -51.9(2) . . . . ?
 C14 C5 C6 C11 68.74(17) . . . . ?
 C14 C5 C4 O8 168.92(16) . . . . ?
 C14 C5 C4 C3 40.1(2) . . . . ?
 C14 C5 C4 C12 -78.12(19) . . . . ?
 C6 O7 C27 O10 168.28(15) . . . . ?
 C6 C5 C14 C15 -43.6(2) . . . . ?
 C6 C5 C4 O8 -79.15(18) . . . . ?
 C6 C5 C4 C3 152.01(16) . . . . ?
 C6 C5 C4 C12 33.82(18) . . . . ?
 C36 O9 C35 O6 82.1(2) . . . . ?
 C36 C37 C38 C39 -179.9(2) . . . . ?
 C36 C37 C42 C41 -179.7(2) . . . . ?
 C2 C1 C12 O5 -111.08(19) . . . . ?
 C2 C1 C12 C4 2.5(2) . . . . ?
 C2 C1 C12 C11 117.98(19) . . . . ?
 C2 C3 C4 O8 127.42(16) . . . . ?
 C2 C3 C4 C5 -102.53(18) . . . . ?
 C2 C3 C4 C12 15.66(19) . . . . ?
 C3 O3 C21 O4 -5.0(3) . . . . ?
 C3 O3 C21 C22 175.14(16) . . . . ?
 C3 C2 C13 C18 49.1(3) . . . . ?
 C3 C2 C13 C17 -127.5(2) . . . . ?
 C19 C5 C14 C15 -169.29(17) . . . . ?
 C19 C5 C6 O7 -62.3(2) . . . . ?
 C19 C5 C6 C7 68.9(2) . . . . ?
 C19 C5 C6 C11 -170.49(16) . . . . ?
 C19 C5 C4 O8 46.4(2) . . . . ?
 C19 C5 C4 C3 -82.4(2) . . . . ?
 C19 C5 C4 C12 159.36(16) . . . . ?
 C10 O6 C35 O9 60.4(2) . . . . ?
 C7 C6 C11 O1 54.3(2) . . . . ?
 C7 C6 C11 C10 -60.6(2) . . . . ?
 C7 C6 C11 C12 168.28(16) . . . . ?
 C7 C8 C9 C20 179.55(17) . . . . ?
 C7 C8 C9 C10 55.3(2) . . . . ?
 C38 C37 C36 O9 -175.55(18) . . . . ?
 C38 C37 C42 C41 0.6(3) . . . . ?
 C38 C39 C40 C41 0.2(4) . . . . ?
 C12 O5 B1 O8 -5.1(2) . . . . ?
 C12 O5 B1 C26 176.15(19) . . . . ?
 C12 C1 C2 C3 8.1(2) . . . . ?
 C12 C1 C2 C13 -174.9(2) . . . . ?
 C29 C34 C33 C32 1.6(4) . . . . ?
 C29 C30 C31 C32 0.8(4) . . . . ?
 C42 C37 C36 O9 4.8(3) . . . . ?
 C42 C37 C38 C39 -0.2(3) . . . . ?
 C42 C41 C40 C39 0.2(4) . . . . ?
 C4 O8 B1 O5 0.5(2) . . . . ?
 C4 O8 B1 C26 179.27(19) . . . . ?
 C4 C5 C14 C15 66.0(2) . . . . ?
 C4 C5 C6 O7 60.68(19) . . . . ?
 C4 C5 C6 C7 -168.14(16) . . . . ?
 C4 C5 C6 C11 -47.52(17) . . . . ?
 C4 C12 C11 O1 93.65(17) . . . . ?
 C4 C12 C11 C6 -22.58(19) . . . . ?
 C4 C12 C11 C10 -145.87(17) . . . . ?
 C25 N1 C22 C21 177.74(19) . . . . ?
 C25 N1 C22 C23 0.1(3) . . . . ?
 C25 C24 C23 C22 -0.2(3) . . . . ?
 C13 C2 C3 O3 41.9(2) . . . . ?
 C13 C2 C3 C4 167.43(18) . . . . ?
 C11 O1 C15 O2 171.60(17) . . . . ?
 C11 O1 C15 C14 -12.3(3) . . . . ?
 C11 C6 C7 C8 56.0(2) . . . . ?
 C11 C10 C9 C8 -58.2(2) . . . . ?
 C11 C10 C9 C20 178.44(16) . . . . ?
 C11 C12 C4 O8 110.62(16) . . . . ?
 C11 C12 C4 C5 -7.11(19) . . . . ?
 C11 C12 C4 C3 -134.69(16) . . . . ?
 C16 C1 C2 C3 -169.32(19) . . . . ?
 C16 C1 C2 C13 7.7(3) . . . . ?
 C16 C1 C12 O5 66.5(2) . . . . ?
 C16 C1 C12 C4 -179.89(17) . . . . ?
 C16 C1 C12 C11 -64.5(2) . . . . ?
 C9 C8 C7 C6 -53.6(2) . . . . ?
 C9 C10 C11 O1 -57.41(19) . . . . ?
 C9 C10 C11 C6 60.57(19) . . . . ?
 C9 C10 C11 C12 -178.68(16) . . . . ?
 C34 C29 C28 O10 -54.3(3) . . . . ?
 C34 C29 C30 C31 -1.3(3) . . . . ?
 C28 O10 C27 O7 -78.2(2) . . . . ?
 C28 C29 C34 C33 -177.2(2) . . . . ?
 C28 C29 C30 C31 176.0(2) . . . . ?
 C30 C29 C34 C33 0.1(3) . . . . ?
 C30 C29 C28 O10 128.5(2) . . . . ?
 C33 C32 C31 C30 0.9(4) . . . . ?
 C31 C32 C33 C34 -2.2(4) . . . . ?
 B1 O8 C4 C5 117.18(17) . . . . ?
 B1 O8 C4 C3 -108.37(18) . . . . ?
 B1 O8 C4 C12 3.8(2) . . . . ?
 B1 O5 C12 C1 120.28(18) . . . . ?
 B1 O5 C12 C4 7.00(19) . . . . ?
 B1 O5 C12 C11 -106.14(18) . . . . ?

_shelx_res_file
;
    p16282_a.res created by SHELXL-2014/7

TITL p16282_a.res in P2(1)
REM Old TITL P16282 in P2(1)
REM SHELXT solution in P2(1)
REM R1 0.074, Rweak 0.035, Alpha 0.001, Orientation as input
REM Flack x = 0.102 ( 0.052 ) from Parsons' quotients
REM Formula found by SHELXT: C43 N O9
CELL 1.54178 8.7826 22.1496 10.3099 90 109.928 90
ZERR 2 0.0004 0.001 0.0005 0 0.002 0
LATT -1
SYMM -X,0.5+Y,-Z
SFAC C H B N O
UNIT 84 96 2 2 20

L.S. 20
PLAN  20
SIZE 0.087 0.251 0.361
TEMP -173.15
BOND $H
LIST 6
MORE -1
CONF
fmap 2
acta
REM <olex2.extras>
REM <HklSrc "%.\\p16282_a.hkl">
REM </olex2.extras>

WGHT    0.036100    0.254200
EXTI    0.000715
FVAR       0.78989
O1    5    0.426876    0.427186    0.512201    11.00000    0.01456    0.01694 =
         0.01372    0.00186    0.00623   -0.00122
O8    5    0.392974    0.463707    0.083686    11.00000    0.01429    0.01682 =
         0.01123    0.00228    0.00549    0.00008
O6    5    0.768576    0.446901    0.600863    11.00000    0.01119    0.01833 =
         0.01279    0.00243    0.00314    0.00028
O3    5    0.102992    0.361036    0.095713    11.00000    0.01241    0.01879 =
         0.01269    0.00155    0.00249   -0.00133
O7    5    0.474019    0.547992    0.289148    11.00000    0.01375    0.01457 =
         0.01510    0.00255    0.00610    0.00075
O5    5    0.629979    0.438263    0.257449    11.00000    0.01152    0.01972 =
         0.01387   -0.00129    0.00547    0.00036
O10   5    0.545797    0.632210    0.198316    11.00000    0.01712    0.02051 =
         0.01499    0.00137    0.00373   -0.00420
O9    5    0.989345    0.495564    0.564754    11.00000    0.01422    0.01979 =
         0.01441    0.00104    0.00292   -0.00379
O2    5    0.221403    0.375617    0.530403    11.00000    0.01926    0.02337 =
         0.02149    0.00417    0.00906   -0.00264
O4    5    0.055818    0.398422   -0.118789    11.00000    0.01720    0.02337 =
         0.01621    0.00429    0.00406   -0.00213
N1    4   -0.278791    0.374277   -0.179454    11.00000    0.01585    0.02053 =
         0.01490    0.00128    0.00317   -0.00068
C37   1    1.158150    0.570356    0.716226    11.00000    0.01481    0.02134 =
         0.01514    0.00029    0.00829   -0.00087
C15   1    0.269046    0.410546    0.462973    11.00000    0.01551    0.01727 =
         0.01607   -0.00172    0.00784   -0.00007
C21   1    0.007050    0.375179   -0.033902    11.00000    0.01479    0.01346 =
         0.01229    0.00028    0.00255    0.00094
C1    1    0.499087    0.352898    0.332143    11.00000    0.01589    0.01544 =
         0.01285    0.00007    0.00524    0.00293
C5    1    0.241965    0.475453    0.245164    11.00000    0.01321    0.01513 =
         0.01282   -0.00077    0.00568   -0.00036
C22   1   -0.160536    0.359015   -0.057269    11.00000    0.01680    0.01751 =
         0.01420    0.00089    0.00347    0.00084
C35   1    0.901650    0.441579    0.552139    11.00000    0.01203    0.01861 =
         0.01604   -0.00005    0.00498    0.00008
AFIX  23
H35A  2    0.975257    0.409457    0.604866    11.00000   -1.20000
H35B  2    0.860575    0.429280    0.453956    11.00000   -1.20000
AFIX   0
C27   1    0.416641    0.604165    0.223350    11.00000    0.01444    0.01940 =
         0.01438    0.00401    0.00326    0.00039
AFIX  23
H27A  2    0.326560    0.597382    0.135520    11.00000   -1.20000
H27B  2    0.376696    0.629805    0.283606    11.00000   -1.20000
AFIX   0
C14   1    0.159844    0.439592    0.331779    11.00000    0.01230    0.01898 =
         0.01636   -0.00074    0.00659   -0.00132
AFIX  23
H14A  2    0.085269    0.467239    0.356234    11.00000   -1.20000
H14B  2    0.092907    0.407471    0.272533    11.00000   -1.20000
AFIX   0
C6    1    0.377707    0.513524    0.351600    11.00000    0.01090    0.01604 =
         0.01253    0.00097    0.00478   -0.00039
C36   1    1.104801    0.505426    0.699215    11.00000    0.01418    0.02200 =
         0.01404    0.00006    0.00196   -0.00210
AFIX  23
H36A  2    1.199931    0.478981    0.713094    11.00000   -1.20000
H36B  2    1.055907    0.494925    0.769745    11.00000   -1.20000
AFIX   0
C2    1    0.368217    0.327302    0.241080    11.00000    0.01550    0.01609 =
         0.01258    0.00001    0.00367    0.00317
C8    1    0.479553    0.577923    0.563597    11.00000    0.01813    0.01716 =
         0.01544   -0.00282    0.00726   -0.00025
AFIX  23
H8A   2    0.446501    0.599705    0.633562    11.00000   -1.20000
H8B   2    0.531627    0.607427    0.519863    11.00000   -1.20000
AFIX   0
C3    1    0.275091    0.370462    0.128130    11.00000    0.01151    0.01601 =
         0.01274    0.00090    0.00282    0.00073
AFIX  13
H3    2    0.303350    0.361980    0.043795    11.00000   -1.20000
AFIX   0
C20   1    0.751347    0.557289    0.743187    11.00000    0.02098    0.02116 =
         0.01482   -0.00451    0.00548   -0.00227
AFIX 137
H20A  2    0.808133    0.582852    0.696817    11.00000   -1.50000
H20B  2    0.824338    0.525380    0.794689    11.00000   -1.50000
H20C  2    0.716545    0.581890    0.807009    11.00000   -1.50000
AFIX   0
C19   1    0.112540    0.510710    0.133874    11.00000    0.01266    0.01800 =
         0.01886   -0.00089    0.00377    0.00020
AFIX 137
H19A  2    0.021582    0.483912    0.087104    11.00000   -1.50000
H19B  2    0.158733    0.526553    0.066613    11.00000   -1.50000
H19C  2    0.074201    0.544303    0.176446    11.00000   -1.50000
AFIX   0
C10   1    0.650661    0.491178    0.529071    11.00000    0.01209    0.01430 =
         0.01093    0.00015    0.00223    0.00066
AFIX  13
H10   2    0.699898    0.518581    0.477132    11.00000   -1.20000
AFIX   0
C7    1    0.328861    0.552231    0.453790    11.00000    0.01580    0.01690 =
         0.01523   -0.00042    0.00762    0.00178
AFIX  23
H7A   2    0.258296    0.585702    0.404041    11.00000   -1.20000
H7B   2    0.267046    0.527388    0.498462    11.00000   -1.20000
AFIX   0
C38   1    1.279187    0.587270    0.837731    11.00000    0.02177    0.02637 =
         0.01388    0.00303    0.00540   -0.00313
AFIX  43
H38   2    1.325595    0.557827    0.906956    11.00000   -1.20000
AFIX   0
C12   1    0.503270    0.420362    0.307378    11.00000    0.01090    0.01726 =
         0.01101    0.00066    0.00388    0.00135
C29   1    0.796065    0.686673    0.282860    11.00000    0.02010    0.01970 =
         0.01646    0.00199    0.00089   -0.00341
C42   1    1.090686    0.614112    0.615572    11.00000    0.01588    0.02367 =
         0.01651    0.00126    0.00468    0.00134
AFIX  43
H42   2    1.007137    0.603332    0.532346    11.00000   -1.20000
AFIX   0
C4    1    0.342212    0.433232    0.184650    11.00000    0.01182    0.01605 =
         0.01081    0.00105    0.00443   -0.00006
C25   1   -0.423055    0.352603   -0.179192    11.00000    0.01473    0.03152 =
         0.02213    0.00445    0.00168   -0.00028
AFIX  43
H25   2   -0.524197    0.357121   -0.251400    11.00000   -1.20000
AFIX   0
C13   1    0.312894    0.263804    0.236358    11.00000    0.01872    0.01678 =
         0.02015    0.00085   -0.00074    0.00166
C11   1    0.496741    0.462600    0.427032    11.00000    0.01274    0.01519 =
         0.01035    0.00119    0.00504   -0.00035
C16   1    0.632210    0.321527    0.442410    11.00000    0.01931    0.01880 =
         0.01685   -0.00151   -0.00126    0.00389
AFIX 137
H16A  2    0.632779    0.334928    0.533164    11.00000   -1.50000
H16B  2    0.736439    0.331297    0.432335    11.00000   -1.50000
H16C  2    0.614655    0.277796    0.433996    11.00000   -1.50000
AFIX   0
C9    1    0.603466    0.528866    0.635821    11.00000    0.01765    0.01769 =
         0.01194   -0.00186    0.00560   -0.00296
AFIX  13
H9    2    0.551436    0.501151    0.684950    11.00000   -1.20000
AFIX   0
C24   1   -0.397696    0.322832   -0.055925    11.00000    0.01818    0.04324 =
         0.03124    0.01222    0.00805   -0.00513
AFIX  43
H24   2   -0.477861    0.303130   -0.028435    11.00000   -1.20000
AFIX   0
C23   1   -0.232052    0.326948    0.021401    11.00000    0.01880    0.03446 =
         0.01986    0.00946    0.00622   -0.00030
AFIX  43
H23   2   -0.179243    0.310749    0.110834    11.00000   -1.20000
AFIX   0
C34   1    0.884572    0.651139    0.223534    11.00000    0.02269    0.01614 =
         0.03457    0.00393    0.00801   -0.00003
AFIX  43
H34   2    0.854079    0.610258    0.201259    11.00000   -1.20000
AFIX   0
C26   1    0.658314    0.494855    0.047349    11.00000    0.01770    0.02730 =
         0.02004    0.00148    0.00714   -0.00115
AFIX 137
H26A  2    0.630072    0.475324   -0.043089    11.00000   -1.50000
H26B  2    0.774250    0.489562    0.097900    11.00000   -1.50000
H26C  2    0.633169    0.538029    0.034883    11.00000   -1.50000
AFIX   0
C28   1    0.657483    0.660179    0.317908    11.00000    0.02403    0.02787 =
         0.01856   -0.00484    0.00672   -0.00621
AFIX  23
H28A  2    0.698828    0.629914    0.392335    11.00000   -1.20000
H28B  2    0.601935    0.692393    0.351296    11.00000   -1.20000
AFIX   0
C41   1    1.145480    0.673533    0.636773    11.00000    0.02451    0.02198 =
         0.02331    0.00501    0.00902    0.00266
AFIX  43
H41   2    1.099743    0.703013    0.567478    11.00000   -1.20000
AFIX   0
C39   1    1.333358    0.646648    0.859470    11.00000    0.03030    0.02917 =
         0.01686   -0.00293    0.00521   -0.01024
AFIX  43
H39   2    1.415905    0.657612    0.943150    11.00000   -1.20000
AFIX   0
C40   1    1.266326    0.689955    0.758326    11.00000    0.03369    0.01860 =
         0.02583   -0.00415    0.01270   -0.00378
AFIX  43
H40   2    1.303152    0.730557    0.772465    11.00000   -1.20000
AFIX   0
C32   1    1.065143    0.733876    0.231788    11.00000    0.02046    0.03075 =
         0.03198    0.00956    0.00109   -0.00793
AFIX  43
H32   2    1.158006    0.749663    0.216215    11.00000   -1.20000
AFIX   0
C30   1    0.842723    0.746569    0.314576    11.00000    0.03695    0.02160 =
         0.01751   -0.00182    0.00606   -0.00358
AFIX  43
H30   2    0.782341    0.771906    0.353518    11.00000   -1.20000
AFIX   0
C33   1    1.017047    0.674502    0.196284    11.00000    0.02044    0.02617 =
         0.03924    0.00733    0.00968    0.00422
AFIX  43
H33   2    1.074948    0.649980    0.153389    11.00000   -1.20000
AFIX   0
C18   1    0.278533    0.230803    0.103756    11.00000    0.03478    0.01936 =
         0.02446   -0.00162    0.00243    0.00017
AFIX 137
H18A  2    0.197157    0.252973    0.029932    11.00000   -1.50000
H18B  2    0.237462    0.190382    0.112137    11.00000   -1.50000
H18C  2    0.378344    0.227315    0.081847    11.00000   -1.50000
AFIX   0
C31   1    0.977579    0.769269    0.289263    11.00000    0.03953    0.02249 =
         0.02335   -0.00015    0.00356   -0.01288
AFIX  43
H31   2    1.009305    0.809993    0.312273    11.00000   -1.20000
AFIX   0
B1    3    0.558956    0.465709    0.130508    11.00000    0.01505    0.01737 =
         0.01348   -0.00384    0.00517   -0.00004
C17   1    0.288094    0.239598    0.345920    11.00000    0.04840    0.01993 =
         0.02919    0.00192    0.01347   -0.00699
AFIX  93
H17A  2    0.305859    0.263020    0.426948    11.00000   -1.20000
H17B  2    0.252663    0.198934    0.342937    11.00000   -1.20000
AFIX   0
H1    2   -0.262542    0.394692   -0.247392    11.00000   -1.20000
HKLF 4

REM  p16282_a.res in P2(1)
REM R1 =  0.0311 for    7609 Fo > 4sig(Fo)  and  0.0338 for all    7996 data
REM    496 parameters refined using      1 restraints

END

WGHT      0.0361      0.2542

REM Highest difference peak  0.196,  deepest hole -0.192,  1-sigma level  0.038
Q1    1   0.5116  0.4411  0.3659  11.00000  0.05    0.20
Q2    1   0.5767  0.4779  0.4773  11.00000  0.05    0.20
Q3    1   0.4078  0.3392  0.3262  11.00000  0.05    0.19
Q4    1   0.4203  0.4296  0.2484  11.00000  0.05    0.19
Q5    1   0.2923  0.4564  0.2166  11.00000  0.05    0.18
Q6    1   0.1975  0.4574  0.2874  11.00000  0.05    0.18
Q7    1   0.6170  0.5086  0.5770  11.00000  0.05    0.18
Q8    1   0.1725  0.4973  0.1981  11.00000  0.05    0.18
Q9    1   0.3028  0.4976  0.2904  11.00000  0.05    0.17
Q10   1   0.6138  0.4865  0.1011  11.00000  0.05    0.17
Q11   1   0.3405  0.5336  0.3889  11.00000  0.05    0.17
Q12   1   0.6820  0.5400  0.6939  11.00000  0.05    0.16
Q13   1   1.0039  0.7498  0.2340  11.00000  0.05    0.16
Q14   1   0.5901  0.5115 -0.0490  11.00000  0.05    0.15
Q15   1   0.4338  0.4872  0.4014  11.00000  0.05    0.15
Q16   1  -0.4470  0.3568 -0.1001  11.00000  0.05    0.15
Q17   1   0.7298  0.6759  0.2983  11.00000  0.05    0.15
Q18   1  -0.5274  0.3717 -0.2820  11.00000  0.05    0.15
Q19   1   0.3164  0.3465  0.1858  11.00000  0.05    0.15
Q20   1   1.1612  0.6710  0.9013  11.00000  0.05    0.14
;
_shelx_res_checksum               74179
_shelx_hkl_file
;
   1   0   0 2329.67   85.79
   1   0   0 2270.07   84.99
  -1   0   0 2361.76   85.69
  -1   0   0 2344.37   84.99
   2   0   0  180.18   12.00
   2   0   0  195.48   10.80
  -2   0   0  192.58   11.80
  -2   0   0  195.18   10.40
  -3   0   0  507.85   23.00
  -3   0   0  493.15   25.20
   3   0   0  466.85   24.20
  -4   0   0  -12.00    7.50
  -4   0   0  -15.40   10.60
  -5   0   0   31.90    5.30
  -5   0   0   23.60   18.60
  -5   0   0   28.40   14.00
   6   0   0    3.20    7.00
   6   0   0    7.20    7.10
   6   0   0   14.30    6.70
  -6   0   0    3.00   26.80
   6   0   0    4.50    5.50
   6   0   0    5.50    7.00
  -7   0   0    7.00    3.50
   7   0   0   -0.70    6.30
   7   0   0    0.50    5.90
   7   0   0    5.50    6.20
   7   0   0    7.20    6.40
  -8   0   0  559.94   26.40
   8   0   0  586.24   26.90
   8   0   0  572.44   25.70
  -8   0   0  593.34   23.90
   8   0   0  581.44   27.40
   9   0   0    3.30    4.40
  -9   0   0    3.70    2.80
  -9   0   0    1.00    3.70
   9   0   0    4.20    4.30
   9   0   0   -1.80    4.80
 -10   0   0    8.10    2.70
 -10   0   0    3.40    2.50
  10   0   0    6.80    3.90
  10   0   0    4.10    3.00
   0   1   0    0.40    1.20
  -1  -1   0 1376.06   47.10
   1  -1   0 1239.48   47.40
   1  -1   0 1391.76   46.90
  -1  -1   0 1247.88   48.00
  -1   1   0 1302.67   47.60
   1   1   0 1217.28   47.40
   1   1   0 1160.58   47.90
  -2  -1   0  866.41   35.80
  -2  -1   0  899.41   34.60
   2  -1   0  892.51   34.80
  -2  -1   0  894.41   32.60
   2   1   0  865.91   35.00
  -2   1   0  901.11   35.00
  -2   1   0  869.81   36.30
   2   1   0  823.92   36.30
  -3  -1   0  943.51   38.10
  -3  -1   0  902.81   40.10
   3  -1   0  876.61   38.70
   3   1   0  915.91   39.30
  -3   1   0  949.80   41.20
  -3   1   0  966.20   38.80
   3   1   0  904.11   41.90
  -4  -1   0  160.78   15.00
  -4  -1   0  113.19   22.40
  -4   1   0  151.88   16.20
  -4   1   0  138.59   18.90
  -5  -1   0   42.20    5.40
  -5  -1   0   25.90   17.40
  -5  -1   0   39.00   14.30
  -5   1   0   47.50   15.40
  -5   1   0   49.10    7.70
  -5   1   0   39.30   19.70
   6  -1   0  167.88   14.60
   6  -1   0  181.28   11.30
   6  -1   0  178.68   13.30
   6  -1   0  166.08   13.60
   6  -1   0  170.28   13.80
  -6  -1   0  175.28   29.40
  -6   1   0  186.38   13.60
   6   1   0  141.89   15.70
   6   1   0  164.58   12.20
   6   1   0  154.58   13.30
   6   1   0  174.08   15.00
   6   1   0  180.88   14.30
  -6   1   0  154.28   32.30
   7  -1   0   27.40    6.10
   7  -1   0   20.10    6.50
   7  -1   0   17.90    6.40
   7  -1   0   28.30    7.70
   7  -1   0   24.40    5.30
  -7  -1   0   24.80    4.50
   7   1   0   24.80    6.60
   7   1   0   29.10    7.30
   7   1   0   17.90    6.80
  -7   1   0   26.50    4.30
   7   1   0   18.70    6.30
  -8  -1   0   35.50    6.40
  -8  -1   0   32.50    6.30
   8  -1   0   39.30    6.80
   8  -1   0   23.70    6.00
   8  -1   0   35.00    6.70
  -8   1   0   37.80    6.20
   8   1   0   30.10    6.70
  -8   1   0   26.60    8.80
   8   1   0   34.90    7.40
   8   1   0   19.30    5.90
   9  -1   0    5.00    4.50
   9  -1   0   -1.30    4.40
   9  -1   0   10.40    4.70
  -9  -1   0    3.20    3.80
  -9  -1   0    4.30    2.80
  -9   1   0    1.90    3.50
   9   1   0    8.10    4.50
   9   1   0   -1.50    4.90
   9   1   0   -2.40    4.40
  -9   1   0    2.60    2.60
 -10  -1   0   21.70    3.20
  10  -1   0   24.30    5.80
  10  -1   0   23.40    4.80
 -10  -1   0   29.60    4.20
 -10   1   0   34.00    3.90
  10   1   0   24.30    5.40
 -10   1   0   32.60    4.70
  10   1   0   32.90    6.10
   0  -2   0 9559.14  346.37
   0  -2   0 9999.00  347.27
   0   2   0 9879.51  346.37
   0   2   0 9234.58  347.07
   0   2   0 9390.46  346.37
  -1  -2   0 2133.89   73.79
  -1  -2   0 1918.71   75.89
   1  -2   0 1971.00   73.89
   1  -2   0 2168.68   74.19
  -1  -2   0 2122.79   74.39
  -1  -2   0 1720.53   74.59
   1   2   0 1891.71   74.19
  -1   2   0 2150.78   73.99
   1   2   0 1959.70   73.99
  -1   2   0 2017.90   74.09
   2  -2   0  900.91   33.90
  -2  -2   0  885.51   36.10
  -2  -2   0  935.01   35.10
   2  -2   0  845.82   35.20
  -2  -2   0  980.10   34.60
   2   2   0  846.82   36.90
  -2   2   0  905.71   35.80
   2   2   0  859.51   35.70
  -2   2   0  832.52   36.80
  -3  -2   0   98.39   11.90
   3  -2   0  114.99   13.20
  -3  -2   0  105.99    9.80
  -3   2   0  109.99   13.30
  -3   2   0  113.19   11.10
   3   2   0  116.29   16.30
   3   2   0   98.89   14.80
  -4  -2   0  133.09   19.90
  -4  -2   0  147.29   14.70
  -4   2   0  141.49   16.80
  -4   2   0  128.39   19.30
  -5  -2   0  239.08   24.00
  -5  -2   0  229.68   30.00
  -5  -2   0  182.38   42.20
  -5  -2   0  205.88   11.80
  -5   2   0  252.97   27.70
  -5   2   0  225.38   34.10
  -5   2   0  200.58   11.30
   6  -2   0  138.79   12.00
   6  -2   0  150.38   10.40
   6  -2   0  136.99   14.00
  -6  -2   0  135.19   27.50
   6  -2   0  115.69   15.60
   6  -2   0  140.89   12.80
   6  -2   0  155.68   13.00
  -6  -2   0  114.19   12.10
   6   2   0  146.69   14.50
   6   2   0  115.69   11.30
   6   2   0  142.19   14.10
   6   2   0  152.18   14.70
   6   2   0  134.39   12.90
  -6   2   0  155.58    8.90
   6   2   0  145.29   14.40
   7  -2   0  158.48   10.30
   7  -2   0  184.98   20.60
   7  -2   0  153.38   13.10
   7  -2   0  181.28   14.10
  -7  -2   0  173.08   10.40
   7  -2   0  167.68   12.50
   7   2   0  167.78   14.00
   7   2   0  169.28   13.80
  -7   2   0  175.98   10.10
   7   2   0  158.88   13.50
   7   2   0  141.79   14.50
  -8  -2   0  323.07   17.20
  -8  -2   0  341.77   15.50
   8  -2   0  334.17   17.00
   8  -2   0  333.97   18.70
   8  -2   0  334.37   17.90
  -8   2   0  343.27   15.10
   8   2   0  319.47   18.70
  -8   2   0  329.07   16.20
   8   2   0  355.66   18.70
   8   2   0  316.37   19.20
   8   2   0  329.37   18.00
  -9  -2   0  106.89    8.00
  -9  -2   0  106.29    7.20
   9  -2   0  101.09    9.30
   9  -2   0  106.19    9.00
   9  -2   0  114.79    8.90
   9   2   0  107.69   10.30
  -9   2   0   99.99    6.60
  -9   2   0   97.39    7.20
   9   2   0  100.79    9.90
   9   2   0  105.99   10.20
 -10  -2   0   13.40    2.70
  10  -2   0   14.50    4.00
 -10  -2   0    8.60    2.90
 -10   2   0   10.90    2.70
 -10   2   0   13.10    2.50
  10   2   0   12.30    3.80
  10   2   0   14.60    4.10
   0  -3   0   -0.20    1.30
   0  -3   0    0.40    2.20
   0  -3   0    1.90    1.70
   0   3   0    2.00    1.60
   0   3   0    0.90    1.70
   0   3   0   -1.50    2.10
   0   3   0    2.50    2.00
  -1  -3   0 1028.50   38.30
   1  -3   0 1100.99   39.50
  -1  -3   0 1067.19   39.60
  -1  -3   0 1046.60   38.30
  -1  -3   0  959.30   40.40
   1  -3   0  888.21   38.90
   1   3   0  883.51   40.80
  -1   3   0 1110.99   38.60
  -1   3   0  926.71   40.10
   1   3   0  976.50   38.70
  -1   3   0 1073.29   38.80
   1   3   0 1005.20   38.10
   1   3   0  985.60   38.60
   2  -3   0  233.38   11.90
   2  -3   0  210.48   12.40
  -2  -3   0  244.08   11.80
  -2  -3   0  192.38   14.70
  -2  -3   0  222.08   12.50
  -2  -3   0  240.58   12.30
   2   3   0  236.68   13.70
  -2   3   0  220.68   12.50
   2   3   0  224.78   14.20
  -2   3   0  222.98   13.60
  -3  -3   0  193.28   11.90
  -3  -3   0  205.98   14.50
   3  -3   0  194.58   16.10
  -3  -3   0  219.98   13.00
  -3  -3   0  166.38   18.70
   3   3   0  180.98   18.60
  -3   3   0  186.48   14.30
   3   3   0  181.98   19.80
  -3   3   0  192.98   15.60
  -4  -3   0  905.51   52.99
  -4  -3   0 1051.69   42.20
  -4  -3   0  885.81   48.60
  -4   3   0 1052.69   45.00
  -4   3   0  907.11   47.50
  -5  -3   0  207.98   11.70
  -5  -3   0  200.78   46.40
  -5  -3   0  212.88   23.40
  -5  -3   0  223.08   32.90
  -5   3   0  205.98   29.30
  -5   3   0  211.98   10.90
  -5   3   0  194.68   35.50
   6  -3   0  247.48   12.70
   6  -3   0  246.18   14.70
  -6  -3   0  227.58   12.40
   6  -3   0  250.37   16.90
  -6  -3   0  260.77   42.60
   6  -3   0  215.88   14.90
   6  -3   0  222.28   15.90
   6   3   0  226.48   17.30
   6   3   0  226.18   17.00
  -6   3   0  240.58   11.90
   6   3   0  242.48   16.20
   6   3   0  232.78   14.00
   6   3   0  219.78   17.50
   6   3   0  258.17   16.10
   7  -3   0   74.89   10.20
   7  -3   0   51.79   10.80
   7  -3   0   60.69    7.80
  -7  -3   0   67.49    7.60
   7  -3   0   51.89    8.60
   7  -3   0   60.39    9.50
   7  -3   0   63.59   12.30
  -7   3   0   76.79   11.70
   7   3   0   63.19    8.20
   7   3   0   56.09   12.20
   7   3   0   67.39   10.80
   7   3   0   70.59   12.00
  -7   3   0   62.79    6.80
   8  -3   0   18.20   12.90
   8  -3   0   17.30    5.10
   8  -3   0   19.00    6.10
  -8  -3   0   13.50    6.20
  -8  -3   0    6.60    3.70
   8  -3   0   12.60    5.80
   8   3   0   15.80    6.00
   8   3   0   17.50    7.00
   8   3   0   15.40    6.60
  -8   3   0   16.50    3.50
  -8   3   0   10.10    4.90
   8   3   0   22.50    7.20
   9  -3   0    1.90    3.80
  -9  -3   0    3.40    3.10
  -9  -3   0    9.70    4.10
   9  -3   0    7.80    4.10
   9  -3   0    6.60    4.10
  -9   3   0    7.50    2.70
   9   3   0    0.70    5.80
  -9   3   0    8.30    3.10
   9   3   0    6.10    4.60
   9   3   0    7.20    4.80
  10  -3   0   34.60    6.30
 -10  -3   0   25.50    4.40
 -10  -3   0   23.40    3.40
  10  -3   0   35.10    4.90
 -10   3   0   26.90    3.60
 -10   3   0   22.20    3.00
  10   3   0   26.10    4.50
  10   3   0   26.20    4.80
   0  -4   0 2060.59   74.49
   0  -4   0 1873.81   72.79
   0  -4   0 1999.60   74.49
   0   4   0 1817.72   72.69
   0   4   0 2028.70   74.39
   1  -4   0  783.72   31.40
   1  -4   0  691.63   31.90
   1  -4   0  722.53   29.80
  -1  -4   0  762.42   29.50
  -1  -4   0  801.32   31.70
  -1  -4   0  777.52   32.20
  -1  -4   0  766.52   29.30
   1   4   0  750.82   30.10
   1   4   0  724.13   30.20
  -1   4   0  734.43   29.80
  -1   4   0  728.63   31.80
   1   4   0  780.92   29.60
  -1   4   0  768.62   30.90
  -1   4   0  740.53   30.20
   1   4   0  690.93   32.80
  -2  -4   0  114.09    8.70
   2  -4   0  102.39    9.60
  -2  -4   0  106.69    9.70
  -2  -4   0  120.99    8.00
  -2  -4   0  114.69   12.10
   2  -4   0  102.79    9.80
  -2   4   0   97.69    9.10
  -2   4   0   88.19   12.70
  -2   4   0   84.59    9.20
   2   4   0  118.99   11.20
  -3  -4   0  712.03   32.40
  -3  -4   0  764.22   31.60
  -3  -4   0  696.73   33.10
   3  -4   0  826.62   39.30
   3  -4   0  740.33   31.10
  -3  -4   0  702.23   38.50
  -3   4   0  761.42   33.40
  -3   4   0  753.12   36.00
   3   4   0  669.23   35.80
   3   4   0  683.33   37.40
  -3   4   0  787.22   34.00
  -4  -4   0  182.08   15.90
  -4  -4   0  163.38   27.60
  -4  -4   0  192.08   19.90
  -4   4   0  165.88   22.20
  -4   4   0  207.98   26.10
  -4   4   0  190.98   20.40
  -5  -4   0  110.59   23.50
  -5  -4   0  122.89    9.40
  -5  -4   0  139.29   31.00
  -5  -4   0  142.19   21.90
  -5   4   0  143.39    8.50
  -5   4   0  123.09   21.90
  -5   4   0   88.19   23.80
   6  -4   0  120.89   12.20
   6  -4   0  112.59   12.70
   6  -4   0  133.09   11.10
   6  -4   0  126.09    9.40
  -6  -4   0  131.99    9.00
   6  -4   0  129.69   13.00
   6   4   0  131.89   14.60
   6   4   0  104.19   14.20
   6   4   0  118.29   12.90
   6   4   0  144.09   11.80
   6   4   0  121.29   12.40
   6   4   0  120.79   15.80
  -6   4   0  122.89    8.20
  -7  -4   0   27.90    4.80
   7  -4   0   41.00    7.70
   7  -4   0   43.70   10.10
   7  -4   0   25.50    6.40
   7  -4   0   25.60    4.60
   7  -4   0   23.00    5.50
   7  -4   0   19.30    7.40
   7   4   0   30.40    8.20
   7   4   0   34.40    7.70
   7   4   0   31.80    6.50
  -7   4   0   21.30    3.80
   7   4   0   10.20    6.90
   7   4   0   25.30    7.50
  -7   4   0   34.60    6.80
  -8  -4   0   15.70    5.70
   8  -4   0   22.50    4.90
   8  -4   0   30.30    6.40
  -8  -4   0   25.90    4.60
   8  -4   0   32.80    6.40
   8  -4   0   32.00    7.50
  -8   4   0   29.00    5.30
   8   4   0   29.90    7.00
   8   4   0   42.20    7.50
   8   4   0   27.90    7.00
  -8   4   0   33.30    5.20
   8   4   0   24.70    6.20
   8   4   0   21.10    7.10
   9  -4   0   33.50    6.70
  -9  -4   0   20.50    4.40
  -9  -4   0   26.60    3.80
   9  -4   0   14.60    4.20
   9  -4   0   37.10    7.10
  -9   4   0   30.20    4.60
   9   4   0   18.80    5.20
  -9   4   0   24.90    4.40
   9   4   0   24.90    6.70
  10  -4   0    9.80    4.00
  10  -4   0   14.40    3.40
 -10  -4   0   15.40    3.00
  10   4   0    7.70    4.50
 -10   4   0   17.30    2.70
 -10   4   0   18.10    2.50
  10   4   0   13.90    4.30
   0  -5   0    0.30    3.20
   0  -5   0   -0.60    3.10
   0  -5   0    1.20    2.50
   0  -5   0    3.10    6.60
   0   5   0    1.80    3.40
   0   5   0    3.10    3.50
   0   5   0    1.50    2.70
   0   5   0    6.90    4.60
   0   5   0    0.30    2.70
  -1  -5   0 1945.31   79.59
   1  -5   0 1877.21   78.29
  -1  -5   0 2047.90   77.99
  -1  -5   0 2018.10   75.09
   1  -5   0 1949.30   75.59
   1  -5   0 1985.90   75.69
   1  -5   0 2130.49   78.19
  -1  -5   0 2053.09   74.69
   1   5   0 2009.00   75.69
  -1   5   0 2091.89   76.09
  -1   5   0 1998.00   75.59
   1   5   0 1883.21   79.49
  -1   5   0 2015.30   77.89
   1   5   0 2055.09   76.19
  -2  -5   0 1338.97   52.19
   2  -5   0 1465.05   54.69
  -2  -5   0 1380.16   54.59
  -2  -5   0 1361.16   51.79
  -2  -5   0 1303.57   56.49
   2  -5   0 1281.57   52.69
   2   5   0 1274.07   54.09
  -2   5   0 1383.56   53.59
   2   5   0 1330.07   51.79
  -2   5   0 1268.17   56.69
   2   5   0 1304.27   53.99
  -2   5   0 1316.47   52.59
  -3  -5   0  351.36   21.80
  -3  -5   0  336.77   19.80
  -3  -5   0  356.26   26.10
   3  -5   0  397.86   21.30
  -3  -5   0  358.96   18.40
  -3   5   0  336.57   22.90
  -3   5   0  358.46   22.00
  -3   5   0  347.87   21.00
   3   5   0  287.97   27.40
  -3   5   0  311.77   29.70
   3   5   0  326.27   19.70
  -4  -5   0   76.29   14.20
  -4  -5   0   73.39   13.50
  -4  -5   0   62.89   13.70
  -4  -5   0   50.59   16.50
   4   5   0   64.49   13.30
  -4   5   0   74.39   17.30
  -5  -5   0   70.49    8.10
  -5  -5   0   94.89   23.30
  -5  -5   0   60.69   14.60
   5  -5   0   62.59   11.10
  -5  -5   0   29.90   30.90
  -5   5   0   62.29   26.40
  -5   5   0   73.09    6.40
  -5   5   0   48.40   21.40
   6  -5   0  109.69   11.70
  -6  -5   0   92.09    8.40
   6  -5   0  113.89   12.00
   6  -5   0  112.69   11.40
   6  -5   0   95.19   10.30
   6  -5   0  105.29    8.60
   6   5   0  102.29   11.50
   6   5   0  110.29   11.40
   6   5   0   91.29   13.70
   6   5   0   79.09   16.80
   6   5   0  106.89   13.90
  -6   5   0   98.69    7.20
   6   5   0  110.29   12.50
   7  -5   0   39.70    6.80
  -7  -5   0   43.20    7.50
   7  -5   0   45.90    8.60
   7  -5   0   47.20    7.40
   7  -5   0   41.00   10.00
  -7   5   0   48.20    9.20
   7   5   0   50.79   12.00
   7   5   0   37.50    8.00
  -7   5   0   53.49    6.10
   7   5   0   42.00    8.40
   7   5   0   57.49    9.00
   8  -5   0  949.11   37.70
   8  -5   0  953.70   38.30
  -8  -5   0  938.61   36.20
  -8  -5   0  901.01   36.70
   8  -5   0  935.51   37.50
   8  -5   0  925.71   38.00
   8   5   0  937.01   38.10
   8   5   0  949.21   39.10
   8   5   0  886.71   37.00
  -8   5   0  901.41   35.30
   8   5   0  835.32   39.60
   8   5   0  892.11   39.10
  -8   5   0  897.61   35.70
  -9  -5   0   52.49    6.20
   9  -5   0   62.99    7.10
  -9  -5   0   45.10    6.80
   9  -5   0   66.29    7.20
   9  -5   0   65.39    6.80
  -9   5   0   60.79    5.20
   9   5   0   63.29    9.20
   9   5   0   55.79    9.00
  -9   5   0   62.39    5.10
 -10  -5   0   21.20    4.10
  10  -5   0   17.30    6.70
  10  -5   0   26.60    5.00
  10   5   0   23.10    4.70
  10   5   0   22.20    4.00
   0  -6   0  455.65   22.80
   0  -6   0  435.76   19.40
   0  -6   0  453.45   21.70
   0  -6   0  423.46   20.10
   0   6   0  436.16   22.90
   0   6   0  411.26   20.10
   0   6   0  406.46   19.40
   0   6   0  415.06   19.00
   1  -6   0 1222.58   54.59
  -1  -6   0 1380.66   54.59
  -1  -6   0 1335.17   53.99
  -1  -6   0 1277.27   50.89
  -1  -6   0 1343.47   50.39
   1  -6   0 1411.16   54.69
   1  -6   0 1335.87   51.79
   1  -6   0 1272.57   51.79
   1   6   0 1299.57   52.39
   1   6   0 1346.77   51.19
  -1   6   0 1274.57   51.69
  -1   6   0 1399.46   54.69
   1   6   0 1214.98   56.29
  -1   6   0 1273.07   51.89
   1   6   0 1320.77   51.69
   2  -6   0  787.12   35.40
  -2  -6   0  769.42   31.90
  -2  -6   0  769.92   36.50
   2  -6   0  700.23   32.90
  -2  -6   0  747.83   31.30
  -2  -6   0  751.82   35.30
  -2   6   0  750.42   33.40
  -2   6   0  734.43   37.10
   2   6   0  746.93   31.30
   2   6   0  731.83   34.40
  -2   6   0  739.13   32.90
   2   6   0  671.23   34.70
  -3  -6   0  241.48   17.00
  -3  -6   0  249.28   15.30
   3  -6   0  211.38   20.90
  -3  -6   0  249.38   23.50
  -3  -6   0  233.98   22.30
   3   6   0  277.37   16.40
   3   6   0  256.17   28.50
  -3   6   0  228.18   18.60
  -3   6   0  236.28   20.90
  -3   6   0  257.87   22.10
  -4  -6   0 1488.85   59.09
  -4  -6   0 1363.36   71.99
  -4  -6   0 1368.46   61.99
  -4   6   0 1379.46   53.09
  -4   6   0 1403.86   67.49
   4   6   0 1513.55   60.39
  -4   6   0 1503.05   64.69
   5  -6   0  530.75   25.50
  -5  -6   0  492.85   45.00
   5  -6   0  548.25   24.60
   5  -6   0  535.45   24.00
  -5  -6   0  532.45   22.20
  -5  -6   0  594.64   35.10
   5  -6   0  549.15   24.20
   5   6   0  527.55   28.00
   5   6   0  552.84   24.00
  -5   6   0  587.04   46.70
   5   6   0  472.75   27.30
  -5   6   0  556.14   21.60
   6  -6   0   23.20    5.70
  -6  -6   0   26.00    4.50
   6  -6   0   23.30    4.60
   6  -6   0   19.20    6.80
   6  -6   0   20.80    7.00
   6  -6   0   15.10    6.00
  -6   6   0   35.40    7.20
   6   6   0   23.00    6.30
   6   6   0   17.50   10.70
   6   6   0   31.40    8.90
   6   6   0   16.70    7.20
  -6   6   0   15.70    3.40
   7  -6   0  112.49   11.60
   7  -6   0  111.69    9.90
   7  -6   0  116.89   11.20
   7  -6   0   96.49   11.10
  -7  -6   0  113.19    9.20
   7   6   0  106.99   12.90
  -7   6   0  115.99   10.00
   7   6   0  111.49   14.70
   7   6   0  120.09   13.80
   7   6   0   98.29   13.50
   7   6   0  126.09   10.70
  -7   6   0  121.79    7.70
  -8  -6   0  259.17   14.90
   8  -6   0  306.67   16.30
   8  -6   0  288.87   16.10
  -8  -6   0  267.57   13.90
   8  -6   0  278.07   14.30
   8  -6   0  274.97   15.30
   8  -6   0  276.97   17.10
   8   6   0  236.28   23.10
  -8   6   0  272.97   12.60
   8   6   0  266.07   17.60
   8   6   0  303.57   17.80
  -8   6   0  283.77   13.20
   8   6   0  271.27   17.30
   8   6   0  290.27   15.50
   9  -6   0  357.46   15.80
  -9  -6   0  329.37   14.90
   9  -6   0  320.67   15.10
  -9  -6   0  332.57   15.70
  -9   6   0  320.47   13.70
   9   6   0  319.17   16.70
   9   6   0  317.67   17.40
  -9   6   0  332.87   13.80
 -10  -6   0   26.90    4.40
  10   6   0   47.10    5.90
  10   6   0   37.90    6.90
   0  -7   0    2.10    3.70
   0  -7   0    2.30    4.70
   0  -7   0   -4.50    5.60
   0  -7   0   -4.20    6.80
   0   7   0    0.70    6.90
   0   7   0    7.60    5.00
   0   7   0   -4.60    5.70
   0   7   0    6.20    4.20
   1  -7   0 1781.82   69.79
  -1  -7   0 1710.63   65.09
   1  -7   0 1586.44   66.09
   1  -7   0 1658.23   65.79
  -1  -7   0 1720.73   69.59
  -1  -7   0 1739.13   68.49
   1  -7   0 1600.64   69.69
  -1   7   0 1638.24   66.09
  -1   7   0 1725.73   69.19
   1   7   0 1769.92   65.39
   1   7   0 1583.14   66.79
  -1   7   0 1725.93   66.39
   1   7   0 1678.13   65.99
  -2  -7   0 1099.19   49.20
  -2  -7   0 1118.79   49.00
  -2  -7   0 1081.39   43.40
  -2  -7   0 1111.89   43.20
   2  -7   0 1076.99   48.60
   2   7   0  917.71   54.49
   2   7   0  985.20   47.00
  -2   7   0 1056.39   49.99
   2   7   0 1100.99   43.60
  -2   7   0 1072.79   45.70
  -2   7   0 1057.79   45.60
  -3  -7   0  296.07   27.80
   3  -7   0  275.07   27.20
  -3  -7   0  267.87   24.90
  -3  -7   0  300.77   19.20
  -3  -7   0  275.57   17.40
  -3   7   0  295.27   25.80
   3   7   0  304.37   35.70
   3   7   0  309.97   19.20
  -3   7   0  207.68   28.70
  -3   7   0  284.97   21.90
  -4  -7   0  144.29   32.00
  -4  -7   0  130.09   21.90
  -4  -7   0  141.19   17.50
  -4  -7   0  120.99    8.80
  -4   7   0  153.78   24.50
  -4   7   0  143.69    7.50
  -4   7   0  139.89   20.90
   5  -7   0   84.89   12.00
   5  -7   0   87.49    8.50
   5  -7   0   63.29   12.40
  -5  -7   0   86.69    7.60
  -5  -7   0   87.19   18.70
   5  -7   0  103.79   11.00
   5  -7   0   70.99   10.50
  -5  -7   0  134.49   29.50
  -5   7   0   93.99    6.20
   5   7   0   69.59   14.90
   5   7   0   82.49   10.00
   5   7   0   86.99   17.30
   5   7   0   87.99   13.30
  -5   7   0   79.89   28.70
  -6  -7   0  167.68   10.10
   6  -7   0  153.78   12.80
   6  -7   0  153.58   12.20
   6  -7   0  155.08   11.30
   6  -7   0  163.28   12.90
   6   7   0  148.09   15.60
  -6   7   0  179.88   12.00
  -6   7   0  158.88    8.80
   6   7   0  155.78   15.80
   6   7   0  157.28   13.00
   6   7   0  168.68   12.20
   7  -7   0 1094.69   41.60
  -7  -7   0 1022.40   39.00
   7  -7   0 1026.70   40.10
   7  -7   0  983.90   39.80
   7  -7   0  969.30   40.10
  -7  -7   0  928.31   40.40
   7   7   0  908.51   43.30
  -7   7   0  963.70   38.40
  -7   7   0 1067.69   38.10
   7   7   0  978.70   42.70
   7   7   0  932.41   44.30
   7   7   0  945.71   39.60
   7   7   0  998.80   42.50
   8  -7   0  134.69    9.60
   8  -7   0  129.59   11.30
   8  -7   0  153.48   10.60
   8  -7   0  136.89   12.90
  -8  -7   0  124.69    9.40
   8  -7   0  138.49   10.80
   8   7   0  134.39   13.80
   8   7   0  138.49   13.30
  -8   7   0  134.99    8.30
  -8   7   0  136.69    7.90
   8   7   0  140.69   13.50
   8   7   0  137.19   11.00
   9  -7   0   89.19    7.60
  -9  -7   0   66.09    7.00
  -9  -7   0   72.99    8.30
   9  -7   0   68.89   10.20
   9  -7   0   86.79    6.90
   9   7   0   73.29    9.60
  -9   7   0   77.89    5.20
  -9   7   0   76.99    5.20
   9   7   0   55.39    8.80
  10   7   0   23.80    8.00
  10   7   0   19.70    3.90
   0  -8   0  795.22   38.60
   0  -8   0  752.52   32.60
   0  -8   0  683.83   34.00
   0  -8   0  786.62   36.10
   0   8   0  770.52   38.80
   0   8   0  770.62   32.70
   0   8   0  772.32   33.10
   0   8   0  715.63   34.70
  -1  -8   0 2376.66   89.19
   1  -8   0 2246.98   90.79
  -1  -8   0 2427.56   93.09
   1  -8   0 2233.08   94.49
   1  -8   0 2337.77   90.09
  -1  -8   0 2372.66   94.89
   1  -8   0 2488.85   95.19
   1   8   0 2403.56   90.49
  -1   8   0 2359.86   94.29
  -1   8   0 2275.17   90.69
   1   8   0 2381.16   89.39
   1   8   0 2366.86   98.49
  -1   8   0 2328.17   90.49
   1   8   0 2086.29   92.19
  -2  -8   0  308.97   17.50
  -2  -8   0  301.87   23.10
  -2  -8   0  308.97   17.40
   2  -8   0  327.07   27.10
  -2  -8   0  306.87   27.60
   2   8   0  306.07   18.40
   2   8   0  263.37   24.80
  -2   8   0  290.17   23.50
  -2   8   0  328.97   20.70
  -2   8   0  302.47   26.70
  -3  -8   0  608.64   38.80
  -3  -8   0  656.43   30.50
   3  -8   0  647.74   42.90
  -3  -8   0  607.24   30.70
  -3  -8   0  627.24   43.70
   3   8   0  653.13   31.70
  -3   8   0  593.24   24.10
  -3   8   0  634.04   41.40
  -3   8   0  663.53   38.70
  -4  -8   0   73.69   12.90
  -4  -8   0   44.30   15.90
  -4  -8   0   51.29    6.60
  -4  -8   0   41.50   21.40
  -4   8   0   29.30   18.10
  -4   8   0   64.79   22.70
  -4   8   0   56.49    5.00
   5  -8   0  283.87   17.40
   5  -8   0  275.67   15.30
  -5  -8   0  236.08   34.60
   5  -8   0  277.47   13.80
   5  -8   0  275.37   21.50
   5  -8   0  306.97   19.00
   5  -8   0  281.17   15.80
  -5  -8   0  273.47   13.90
   5   8   0  272.87   17.20
   5   8   0  285.87   21.80
   5   8   0  285.07   15.30
  -5   8   0  284.07   12.40
  -5   8   0  256.37   15.30
  -6  -8   0  155.18   10.00
   6  -8   0  160.58   13.00
   6  -8   0  149.39   14.10
   6  -8   0  189.58   14.00
  -6   8   0  146.49   14.20
   6   8   0  165.58   13.10
   6   8   0  153.88   23.70
  -6   8   0  155.38    8.60
   6   8   0  135.09   13.80
   7  -8   0  181.68   13.00
   7  -8   0  194.88   12.60
  -7  -8   0  186.58   14.10
   7  -8   0  183.18   11.90
   7  -8   0  175.68   12.50
  -7  -8   0  183.88   11.00
  -7   8   0  192.18    9.50
   7   8   0  164.68   16.60
   7   8   0  172.98   16.30
   7   8   0  164.58   15.30
  -7   8   0  178.38   10.20
   7   8   0  174.18   12.00
   8  -8   0   74.89   12.80
   8  -8   0   62.39    7.40
   8  -8   0   55.49    9.10
  -8  -8   0   61.09    8.50
   8  -8   0   65.49    8.60
  -8  -8   0   38.70    6.90
  -8   8   0   56.29    5.30
   8   8   0   69.89   11.10
   8   8   0   55.99   11.30
   8   8   0   46.00    7.80
   8   8   0   55.19    9.30
   9  -8   0   83.69    9.70
   9  -8   0   80.99    6.90
   9  -8   0   83.39    7.50
   9  -8   0   79.49   10.70
  -9  -8   0   77.29    6.90
  -9  -8   0   82.59    7.00
   9   8   0   70.69    9.10
   9   8   0   80.59    9.70
  -9   8   0   90.79    5.30
  -9   8   0   80.09    6.80
  10   8   0   53.09    6.10
   0  -9   0   -0.90    7.10
   0  -9   0   -6.40   10.40
   0  -9   0    1.70    5.30
   0   9   0    6.20   12.80
   0   9   0    3.40    6.10
   0   9   0    5.80    7.90
   1  -9   0 1184.18   51.39
   1  -9   0 1159.68   56.59
  -1  -9   0 1273.87   54.79
  -1  -9   0 1287.27   50.69
   1  -9   0 1397.96   59.99
  -1  -9   0 1193.28   58.79
  -1   9   0 1139.99   57.19
   1   9   0 1276.77   64.09
   1   9   0 1295.07   50.99
  -1   9   0 1097.49   54.29
   1   9   0 1242.78   53.29
  -1   9   0 1214.78   52.09
  -2  -9   0  758.02   33.10
  -2  -9   0  677.53   53.09
   2  -9   0  762.62   45.60
  -2  -9   0  773.42   33.90
   2   9   0  778.92   34.80
  -2   9   0  717.83   36.80
   2   9   0  689.43   42.10
  -3  -9   0   57.19   10.30
   3  -9   0   75.79   25.10
  -3  -9   0   55.29   15.40
  -3  -9   0   55.39    6.10
  -3   9   0   77.69   15.40
  -3   9   0   65.99   17.40
  -3   9   0   51.59    4.60
   3   9   0   64.69   12.90
  -4  -9   0   79.29   17.20
  -4  -9   0   38.00   14.10
  -4  -9   0   46.60    6.20
  -4  -9   0   59.09   26.30
  -4   9   0   56.39   25.80
  -4   9   0   49.99    4.60
  -4   9   0   31.90   21.00
   5  -9   0  346.07   19.20
   5  -9   0  368.16   17.80
   5  -9   0  360.16   18.90
   5  -9   0  315.67   21.60
  -5  -9   0  351.96   15.60
   5  -9   0  361.46   17.50
  -5   9   0  364.16   14.80
  -5   9   0  363.66   16.60
   5   9   0  341.37   17.30
   5   9   0  369.06   23.40
   5   9   0  318.37   19.00
   5   9   0  306.87   21.70
  -6  -9   0  290.17   14.30
   6  -9   0  282.07   16.50
   6  -9   0  286.77   15.40
  -6  -9   0  284.67   18.30
   6  -9   0  290.47   15.50
   6   9   0  308.17   20.70
  -6   9   0  283.57   12.90
   6   9   0  268.17   19.60
   6   9   0  302.97   16.00
   7  -9   0  875.71   33.70
   7  -9   0  766.32   32.20
   7  -9   0  766.42   32.50
   7  -9   0  781.92   33.20
  -7  -9   0  766.12   34.80
  -7  -9   0  755.42   32.80
   7   9   0  750.82   36.90
   7   9   0  773.12   35.30
  -7   9   0  799.62   30.80
   7   9   0  763.22   32.40
  -7   9   0  783.52   31.20
   7   9   0  789.42   35.90
   8  -9   0   85.39   10.50
   8  -9   0  113.89    9.70
  -8  -9   0   81.79    9.00
   8  -9   0   84.79   10.40
   8  -9   0  101.09    9.10
  -8  -9   0   80.89    7.80
  -8   9   0   96.49    6.20
   8   9   0  123.49   19.60
   8   9   0  104.29    9.50
  -8   9   0  103.89    6.50
   9  -9   0   99.69    8.10
   9  -9   0   82.49   11.90
   9  -9   0  102.49    7.80
  -9  -9   0   99.69    7.10
  -9  -9   0   94.39    6.90
   9  -9   0   87.79   12.20
  -9   9   0   95.99    5.60
   9   9   0   92.79   10.00
   9   9   0   89.39    9.20
   0 -10   0 2170.18   88.29
   0 -10   0 2368.66   93.99
   0  10   0 2289.97   89.29
   0  10   0 2219.18   88.69
  -1 -10   0 2014.10   79.39
   1 -10   0 1941.11   86.79
  -1 -10   0 2043.30   84.19
   1 -10   0 1909.81   80.29
   1  10   0 2052.19   79.79
   1  10   0 2023.40   82.29
  -1  10   0 2068.99   81.49
  -2 -10   0  344.17   27.80
  -2 -10   0  332.07   13.70
  -2  10   0  311.67   13.20
   2  10   0  319.27   22.30
  -3 -10   0  468.05   27.70
  -3 -10   0  434.76   38.90
  -3 -10   0  449.95   18.30
  -3 -10   0  427.86   27.70
   3  10   0  492.35   30.60
  -3  10   0  418.26   38.60
  -3  10   0  440.86   17.70
  -3  10   0  448.36   34.90
   4 -10   0 1213.28   47.20
  -4 -10   0 1188.48   59.29
   4 -10   0 1152.78   45.70
  -4 -10   0 1203.38   56.49
   4 -10   0 1084.59   45.90
  -4 -10   0 1161.88   44.10
  -4  10   0 1095.09   72.99
  -4  10   0 1170.78   67.89
   4  10   0 1165.28   45.70
   4  10   0 1189.68   48.50
  -4  10   0 1177.68   43.60
  -5 -10   0   91.79   15.20
  -5 -10   0  106.39    7.60
   5 -10   0  105.59   12.40
   5 -10   0   95.29   10.00
   5 -10   0  101.79   10.40
   5 -10   0   79.09   14.60
   5 -10   0   97.19   10.00
   5  10   0  121.09   17.00
   5  10   0   98.59   14.40
   5  10   0   72.09   14.00
  -5  10   0   86.29    8.50
  -5  10   0   95.29    6.20
   5  10   0  103.79    9.70
   5  10   0  103.09   12.20
   6 -10   0  240.28   14.10
   6 -10   0  237.18   15.00
   6 -10   0  243.28   14.00
  -6 -10   0  261.37   13.10
   6 -10   0  238.18   18.50
  -6 -10   0  249.38   16.50
   6 -10   0  268.87   15.00
  -6  10   0  238.78   11.40
   6  10   0  224.08   18.80
   6  10   0  290.07   19.70
   6  10   0  230.88   15.20
   6  10   0  251.57   14.50
  -6  10   0  230.88   12.20
   7 -10   0  126.19   10.80
   7 -10   0  128.49   10.10
  -7 -10   0  163.88   10.20
  -7 -10   0  137.39   12.00
   7 -10   0  113.69   10.30
   7 -10   0  153.28   11.50
  -7  10   0  135.89    7.60
   7  10   0  147.19   10.50
   7  10   0  151.78   14.60
   7  10   0  114.39   16.10
   7  10   0  108.39   17.10
  -7  10   0  131.89    8.30
   8 -10   0    1.00    4.00
   8 -10   0   -0.70    5.10
   8 -10   0    5.60    4.50
  -8 -10   0   -3.70    4.30
   8 -10   0    2.40    4.30
  -8 -10   0    2.30    3.60
   8  10   0    1.60    6.30
   8  10   0    5.90    6.40
  -8  10   0    3.20    2.40
   8  10   0    4.10    4.40
  -8  10   0    5.50    2.60
   8  10   0    2.60    6.40
   9 -10   0    3.70    6.80
   9 -10   0    8.10    4.50
   9 -10   0    9.10    5.80
  -9 -10   0    4.80    3.30
  -9 -10   0    7.20    3.20
   9 -10   0    7.90    4.10
   9  10   0    5.10    4.90
   9  10   0    4.10    4.60
  -9  10   0    5.30    2.30
   0 -11   0    2.30    8.00
   0 -11   0   -3.20   13.50
   0  11   0   14.10    9.40
   0  11   0    0.20   14.00
  -1 -11   0   64.29   14.30
   1 -11   0   76.59   18.00
  -1 -11   0   43.40   14.00
  -1 -11   0   68.99    5.10
   1  11   0   55.49   19.60
  -1  11   0   48.50    4.80
   1  11   0   55.89   11.00
  -1  11   0   54.29   12.70
  -2 -11   0  124.49    7.10
  -2 -11   0  131.29   18.00
  -2 -11   0  142.69   25.10
   2  11   0  131.39   20.00
  -2  11   0   93.59   16.40
  -2  11   0  115.19    6.30
  -3 -11   0   16.60    3.20
  -3 -11   0   36.00   21.10
  -3 -11   0   21.40   13.20
   3  11   0    9.50   18.00
  -3  11   0   53.39   24.30
  -3  11   0   21.50   19.90
  -3  11   0   20.90    3.50
   4 -11   0  182.58   14.40
  -4 -11   0  210.48   34.40
  -4 -11   0  148.09   26.70
   4 -11   0  173.48   12.60
   4 -11   0  172.68   13.00
   4 -11   0  191.08   13.00
   4  11   0  187.88   14.90
   4  11   0  204.08   14.10
  -4  11   0  166.78   10.30
  -4  11   0  157.38   44.00
  -4  11   0  179.38    8.70
   4  11   0  192.58   12.20
   4  11   0  200.58   20.90
   5 -11   0  282.27   17.20
  -5 -11   0  330.17   14.50
   5 -11   0  293.77   15.80
   5 -11   0  331.87   17.10
   5 -11   0  312.37   18.60
  -5 -11   0  287.47   18.20
   5 -11   0  325.47   16.10
   5  11   0  311.97   21.90
   5  11   0  316.87   18.50
   5  11   0  302.97   16.00
  -5  11   0  291.37   14.00
   5  11   0  303.17   17.50
  -5  11   0  306.87   13.20
   5  11   0  251.87   19.80
   6 -11   0  535.65   27.00
   6 -11   0  507.75   24.80
   6 -11   0  555.64   24.40
   6 -11   0  542.55   24.50
   6 -11   0  603.74   25.60
  -6 -11   0  541.85   25.20
  -6 -11   0  604.94   23.80
   6  11   0  504.25   29.10
   6  11   0  558.64   29.10
   6  11   0  554.84   25.00
  -6  11   0  564.84   22.30
   6  11   0  564.24   24.80
  -6  11   0  558.54   22.60
  -7 -11   0  119.99    9.30
   7 -11   0  124.09   10.20
   7 -11   0  126.59   10.10
   7 -11   0  138.79   10.80
  -7 -11   0  120.99   10.90
   7  11   0  124.59   15.40
  -7  11   0  128.59    7.40
   7  11   0  100.59   15.90
   7  11   0  114.39   13.70
   7  11   0  136.99   10.20
  -7  11   0  120.99    7.70
  -8 -11   0  164.98   10.00
   8 -11   0  147.19   11.40
  -8 -11   0  157.78    9.50
   8 -11   0  136.59   11.10
   8 -11   0  166.78   10.60
   8 -11   0  156.28   10.40
   8  11   0  151.08   10.20
   8  11   0  179.28   14.30
   8  11   0  149.09   13.60
  -8  11   0  147.39    7.80
   8  11   0  167.08   13.60
  -9 -11   0   13.70    3.30
   9 -11   0    8.40    3.80
   9 -11   0   14.40    4.60
   9 -11   0   16.80    5.00
  -9 -11   0   14.00    3.70
  -9  11   0   13.10    2.50
   9  11   0    9.80    5.10
   9  11   0   12.60    5.60
   0 -12   0  613.14   23.60
   0 -12   0  612.74   40.20
   0 -12   0  605.34   34.00
   0  12   0  600.04   34.50
   1 -12   0  110.29    7.20
  -1 -12   0  119.29   18.20
  -1 -12   0  103.49    6.40
  -1 -12   0  102.29   19.10
   1 -12   0  114.49   23.30
  -1  12   0   67.79   14.40
  -1  12   0  108.19    6.10
   1  12   0  100.69   16.00
  -2 -12   0  -19.80   16.50
  -2 -12   0    4.80   11.50
  -2 -12   0    1.80    2.50
  -2  12   0  -13.30   16.30
  -2  12   0    1.10    2.00
   2  12   0   23.20   15.20
  -3 -12   0  494.25   35.40
   3 -12   0  488.95   23.00
  -3 -12   0  499.15   50.49
  -3 -12   0  468.65   19.20
  -3  12   0  546.35   47.90
  -3  12   0  461.95   18.60
   3  12   0  449.86   23.20
  -3  12   0  432.26   51.59
   3  12   0  434.96   29.10
   4 -12   0  447.76   21.10
   4 -12   0  430.36   21.30
   4 -12   0  404.36   19.90
  -4 -12   0  395.36   21.00
   4  12   0  427.16   20.00
  -4  12   0  424.56   18.10
   4  12   0  441.06   21.30
   4  12   0  419.96   27.00
   4  12   0  436.26   21.40
  -4  12   0  437.96   17.30
   5 -12   0   19.20   13.30
   5 -12   0   40.00    9.80
   5 -12   0   38.50    7.60
  -5 -12   0   47.90    6.40
   5 -12   0   38.40    7.60
  -5 -12   0   52.59    8.80
   5  12   0   47.10   10.70
  -5  12   0   41.20    5.20
   5  12   0   36.50    7.50
  -5  12   0   32.30    5.90
   5  12   0   45.60    8.50
   6 -12   0  241.98   16.90
  -6 -12   0  237.08   14.70
   6 -12   0  221.18   14.20
   6 -12   0  269.47   14.80
  -6 -12   0  243.48   12.80
   6 -12   0  236.48   13.90
   6  12   0  224.68   16.90
   6  12   0  217.58   19.20
   6  12   0  244.88   15.10
  -6  12   0  231.48   11.60
  -6  12   0  240.08   11.10
   6  12   0  253.47   19.50
   6  12   0  236.18   13.90
   7 -12   0   36.00    7.90
  -7 -12   0   37.70    6.20
   7 -12   0   32.50    5.40
   7 -12   0   37.50    6.10
   7 -12   0   43.60    9.10
  -7 -12   0   39.20    6.80
   7  12   0   29.60    9.00
   7  12   0   17.60    7.60
   7  12   0   34.60    8.90
  -7  12   0   34.40    4.70
   7  12   0   29.20    5.20
  -8 -12   0   26.90    4.50
  -8 -12   0   25.00    4.20
   8 -12   0   25.50    5.00
   8 -12   0   21.60    4.50
   8 -12   0   26.30    5.50
   8 -12   0   16.70    5.80
  -8  12   0   31.50    4.10
   8  12   0   19.20    6.60
   8  12   0   33.10    7.10
   8  12   0   34.40    6.50
   8  12   0   37.20    7.20
  -9 -12   0    1.90    2.90
   9 -12   0   -1.90    4.10
   9 -12   0   -3.30    4.00
  -9 -12   0    6.00    4.10
   9  12   0    7.10    5.10
   9  12   0    1.20    4.70
   0 -13   0    1.50    2.50
   0 -13   0   -0.10   18.30
   0 -13   0  -23.60   12.90
   0  13   0   -7.30   14.60
   0  13   0   -1.70    3.30
  -1 -13   0    2.60    2.60
   1 -13   0    5.40    3.10
  -1 -13   0    8.90   17.70
  -1 -13   0  -12.20   12.60
   1 -13   0   12.90   21.00
  -1  13   0    0.20    2.30
   1  13   0  -16.20   19.90
  -1  13   0  -11.60   16.00
  -2 -13   0   32.40   16.30
  -2 -13   0   19.10    3.00
  -2 -13   0   19.70   22.60
  -2  13   0   37.80   21.80
  -2  13   0   19.70    3.80
  -3 -13   0   69.49   10.70
   3 -13   0   76.39   11.40
   3 -13   0   86.69   11.80
  -3 -13   0   69.29   21.60
   3 -13   0   85.09   10.50
  -3 -13   0   88.39    6.40
   3  13   0   87.89   10.40
   3  13   0   75.69   11.20
  -3  13   0   75.79   33.90
  -3  13   0   90.59    5.50
   3  13   0   58.99   11.00
   4 -13   0   67.19    9.60
   4 -13   0   56.79   10.80
  -4 -13   0   55.09    7.30
   4 -13   0   45.70    9.30
   4  13   0   65.19   10.90
  -4  13   0   58.29    5.00
   4  13   0   52.19   10.30
   4  13   0   74.39    9.10
   4  13   0   39.90   10.60
  -5 -13   0   14.00    6.50
   5 -13   0   17.80    5.30
   5 -13   0   26.00    6.60
   5 -13   0   23.90    5.80
  -5 -13   0   17.20    3.90
   5  13   0   24.30    9.60
   5  13   0   10.10    6.50
  -5  13   0   14.20    2.80
   5  13   0   29.60    7.30
   5  13   0   27.90    5.80
   6 -13   0   44.40    9.00
  -6 -13   0   57.59    9.50
   6 -13   0   66.99    9.00
  -6 -13   0   62.99    7.60
   6 -13   0   61.99   12.10
   6 -13   0   62.09    8.60
   6  13   0   79.69   15.60
   6  13   0   68.29   17.90
  -6  13   0   59.89    5.40
   6  13   0   73.69   11.70
   6  13   0   54.39    8.40
   7 -13   0   27.90    5.80
  -7 -13   0   26.00    4.70
   7 -13   0   27.70    8.50
  -7 -13   0   25.50    7.70
   7 -13   0   42.10    7.60
   7 -13   0   21.00    6.40
   7 -13   0   23.00    5.30
   7  13   0   42.00    9.20
   7  13   0   30.50    5.30
   7  13   0   22.10    9.10
  -7  13   0   29.70    4.40
   7  13   0   22.00    8.20
   8 -13   0   -0.50    3.90
  -8 -13   0    1.00    3.30
   8 -13   0   -4.20    3.30
  -8 -13   0    1.20    3.50
   8 -13   0    0.80    3.80
   8  13   0   13.50    6.60
   8  13   0    3.10    5.60
   8  13   0    1.20    3.50
   8  13   0   -3.90    5.80
  -8  13   0   -1.20    2.20
  -9 -13   0   21.10    5.40
   9  13   0   28.90    6.80
   9  13   0   24.70    5.80
   0 -14   0  243.38   31.80
   0 -14   0  239.58   44.40
   0 -14   0  275.27   11.80
   0  14   0  291.07   35.20
   0  14   0  250.17   12.20
  -1 -14   0  238.38   31.70
   1 -14   0  252.37   11.70
  -1 -14   0  254.97   11.40
   1 -14   0  222.38   50.29
  -1  14   0  239.88   11.00
   1  14   0  296.47   36.20
  -1  14   0  259.87   38.10
   2 -14   0  294.87   17.00
   2 -14   0  325.47   17.30
  -2 -14   0  293.57   17.40
  -2 -14   0  298.87   15.00
  -2 -14   0  313.87   36.20
   2 -14   0  309.57   17.20
   2  14   0  313.17   17.00
   2  14   0  309.57   17.00
  -2  14   0  301.97   13.70
  -2  14   0  278.27   36.60
   2  14   0  280.87   25.10
   2  14   0  286.27   47.80
   3 -14   0   21.90    6.50
   3 -14   0   36.30    6.50
   3 -14   0   38.20    9.30
  -3 -14   0   43.70    6.40
  -3 -14   0   44.00    9.50
   3 -14   0   16.80    9.40
  -3 -14   0   26.50    5.10
   3  14   0   26.00   10.00
   3  14   0   35.80    6.60
   3  14   0   34.60    7.20
   3  14   0   30.80    6.50
  -3  14   0   29.70    4.30
   4 -14   0  226.98   14.30
  -4 -14   0  230.88   14.10
   4 -14   0  245.18   14.70
   4 -14   0  248.88   15.60
   4  14   0  248.28   22.10
   4  14   0  259.47   14.50
   4  14   0  252.37   15.70
   4  14   0  258.37   15.40
  -4  14   0  260.37   11.30
  -5 -14   0  281.37   13.70
   5 -14   0  287.27   15.80
   5 -14   0  274.87   16.20
   5 -14   0  278.87   15.20
  -5 -14   0  262.57   15.40
   5  14   0  283.57   15.20
   5  14   0  263.27   16.50
  -5  14   0  281.27   12.50
   5  14   0  259.47   16.50
   5  14   0  283.37   21.10
   6 -14   0  164.98   11.80
   6 -14   0  182.88   12.60
  -6 -14   0  177.78   10.80
  -6 -14   0  180.88   11.80
   6 -14   0  187.18   14.10
   6  14   0  205.58   17.60
   6  14   0  187.18   13.20
   6  14   0  166.08   11.60
   6  14   0  174.38   18.20
  -6  14   0  181.98    9.20
   7 -14   0   24.10    7.70
  -7 -14   0   25.10    4.90
  -7 -14   0   26.40    4.60
   7 -14   0   39.30    8.00
   7  14   0   26.90    8.10
  -7  14   0   24.70    4.10
   7  14   0   32.80    7.80
   7  14   0   31.10   14.60
   7  14   0   29.30    6.20
  -8 -14   0   40.20    6.30
  -8 -14   0   51.69    5.80
   8 -14   0   56.19    6.90
   8 -14   0   65.19    6.40
   8 -14   0   49.99    6.60
   8  14   0   70.29    9.50
   8  14   0   37.80    9.20
   8  14   0   60.49   11.10
  -8  14   0   52.69    5.60
   8  14   0   47.70    6.00
  -9 -14   0  113.49    6.20
   0 -15   0    4.60    2.70
   0 -15   0   -3.30    5.80
   0 -15   0    4.90   22.50
   0 -15   0    0.40    3.90
   0  15   0   15.60    8.40
   0  15   0   -7.00    5.60
   0  15   0   -5.00   24.00
  -1 -15   0   -2.70   23.90
  -1 -15   0    7.40    2.70
   1 -15   0    7.70    5.70
   1 -15   0    7.50    4.50
   1 -15   0    1.60    3.40
  -1 -15   0   11.80    4.40
   1 -15   0    9.00    7.10
  -1 -15   0    8.30    6.00
  -1  15   0  -34.50   27.40
  -1  15   0    4.60    7.70
   1  15   0  -27.90   28.80
   1  15   0   13.80    6.40
  -1  15   0    2.70    2.70
   1  15   0   20.60    9.00
   2 -15   0   19.50    8.20
  -2 -15   0   16.70    5.10
   2 -15   0   15.00    6.60
   2 -15   0   15.90    6.30
  -2 -15   0   15.90    3.20
  -2 -15   0   15.90    7.20
   2 -15   0   16.80    6.00
  -2  15   0   17.80    2.80
   2  15   0   15.50    8.10
   2  15   0   16.00    6.10
   2  15   0    7.30    9.60
   2  15   0   20.40    6.30
  -2  15   0   12.30    9.20
  -3 -15   0   75.39   13.90
  -3 -15   0   72.49    6.30
  -3 -15   0   76.59    8.20
   3 -15   0   60.89    9.60
   3 -15   0   61.49    8.00
   3  15   0   73.09   10.10
  -3  15   0   63.49    5.30
   3  15   0   48.30    9.60
   3  15   0   63.69   10.20
   3  15   0   75.19   10.50
   4 -15   0   81.69   11.10
   4 -15   0   95.29   10.00
   4 -15   0   56.99    9.60
  -4 -15   0   83.59    9.40
  -4 -15   0   81.29    7.00
   4  15   0   80.89   11.20
   4  15   0   87.39   10.60
   4  15   0   97.39   17.00
  -4  15   0   74.39    5.70
   4  15   0   57.29    9.50
   5 -15   0  186.28   12.70
   5 -15   0  167.78   12.00
  -5 -15   0  177.18   10.30
   5 -15   0  160.08   13.20
  -5 -15   0  167.98   11.60
   5  15   0  146.59   12.80
   5  15   0  167.48   18.60
   5  15   0  161.48   11.70
   5  15   0  156.38   13.30
  -5  15   0  172.58    8.70
  -6 -15   0  108.19    8.60
   6 -15   0  117.39   12.10
   6 -15   0  132.19   10.60
   6 -15   0  125.09   10.10
  -6 -15   0  119.79    9.80
   6  15   0  117.69   13.70
   6  15   0  123.49    9.60
   6  15   0  100.59   15.90
  -6  15   0  121.59    7.20
   6  15   0  149.19   16.60
   6  15   0  134.19   11.40
   7 -15   0  106.99    9.00
   7 -15   0  106.29    9.10
  -7 -15   0  103.19    7.80
   7 -15   0   97.09    8.30
  -7 -15   0   89.99    8.00
   7 -15   0   93.29   12.00
   7  15   0   94.29    8.50
  -7  15   0   91.99    5.90
   7  15   0   91.39   12.80
   7  15   0  118.79   14.30
   7  15   0   80.69   13.90
  -8 -15   0   14.60    3.50
   8 -15   0   17.80    3.70
   8 -15   0   14.60    5.80
  -8 -15   0    8.10    3.20
   8 -15   0   19.40    3.60
  -8  15   0   15.60    2.60
   8  15   0   16.70    7.10
   8  15   0   17.10    9.80
   8  15   0   13.60    3.50
   8  15   0   13.20    5.40
   0 -16   0 1099.09   41.20
   0 -16   0 1097.59   40.80
   0 -16   0 1033.30   43.90
   0 -16   0 1083.39   42.70
   0  16   0 1080.59   43.90
   0  16   0 1162.58   86.69
   0  16   0  996.30   43.80
   0  16   0 1090.69   43.20
   1 -16   0  188.38   12.60
  -1 -16   0  184.18   10.70
   1 -16   0  178.48   10.50
  -1 -16   0  180.08    9.50
   1 -16   0  189.68   15.00
  -1 -16   0  188.78   12.80
   1  16   0  189.18   13.20
   1  16   0  219.58   17.20
   1  16   0  193.38   13.80
  -1  16   0  177.88    9.50
  -1  16   0  183.38   14.50
   2 -16   0  261.27   18.10
   2 -16   0  275.87   16.50
   2 -16   0  278.87   16.30
  -2 -16   0  281.57   13.10
   2 -16   0  288.57   16.70
  -2 -16   0  298.37   14.40
  -2 -16   0  296.27   16.50
   2  16   0  319.97   16.50
  -2  16   0  282.47   19.00
   2  16   0  301.47   21.50
   2  16   0  252.67   18.10
  -2  16   0  289.87   12.50
   2  16   0  298.27   16.60
   3 -16   0   28.50    6.30
   3 -16   0   24.70    6.40
   3 -16   0   21.00    8.50
   3 -16   0   28.50    8.00
  -3 -16   0   31.50    5.60
  -3 -16   0   14.10    8.00
  -3  16   0   27.50    4.50
   3  16   0   38.90    8.80
   3  16   0   27.20    8.10
  -3  16   0   28.80   11.70
   3  16   0   17.60    6.70
   4 -16   0   56.29    9.40
   4 -16   0   55.39   10.00
   4 -16   0   52.59    9.00
  -4 -16   0   55.39    6.50
  -4 -16   0   49.10    7.80
   4  16   0   46.90    6.80
  -4  16   0   48.70    5.30
   4  16   0   54.19   10.40
   4  16   0   55.59   11.00
   4  16   0   44.90    7.50
   5 -16   0   85.39   11.00
  -5 -16   0   96.39    9.10
   5 -16   0  106.09   10.30
   5 -16   0  101.99   10.00
  -5 -16   0   90.69    9.30
   5  16   0   87.19   12.50
   5  16   0   94.79   13.90
   5  16   0   95.79   16.20
   5  16   0   77.69   10.30
   5  16   0  109.09    9.80
   6 -16   0   81.79    8.20
   6 -16   0   79.99   10.40
  -6 -16   0   67.59    7.30
  -6 -16   0   76.89    8.10
   6 -16   0   82.79    9.20
   6  16   0  108.89   15.00
   6  16   0   70.79    8.20
   6  16   0   72.29   13.80
  -6  16   0   71.09    5.60
  -7 -16   0   58.79    6.30
  -7 -16   0   40.10    6.00
   7 -16   0   35.10    6.30
   7 -16   0   44.70    7.30
   7 -16   0   47.90    7.20
   7 -16   0   42.30    7.50
   7  16   0   56.99    6.50
   7  16   0   61.39   12.80
   7  16   0   62.39   12.30
  -7  16   0   49.70    4.60
   7  16   0   37.00    7.80
  -8 -16   0   42.50    5.70
   8 -16   0   44.90    5.50
   8 -16   0   37.30    5.80
  -8 -16   0   53.99    7.80
   8  16   0   31.90    7.40
  -8  16   0   43.00    4.70
   8  16   0   38.40    7.50
   0 -17   0   -6.90    3.90
   0 -17   0   11.90    8.20
   0 -17   0   -5.00    4.90
   0  17   0   -8.60    7.20
   0  17   0    7.40    7.10
   0  17   0   -2.20    5.20
  -1 -17   0  146.89   11.30
   1 -17   0  148.59   13.50
   1 -17   0  140.19   11.40
  -1 -17   0  128.59    8.10
  -1 -17   0  135.19    9.10
   1 -17   0  128.69    9.20
   1  17   0  134.09   12.30
   1  17   0  137.79   11.80
  -1  17   0  116.19    8.50
  -1  17   0  126.69   12.60
   1  17   0  155.38   15.60
   2 -17   0  197.38   13.40
  -2 -17   0  184.08   13.10
   2 -17   0  180.28   18.90
   2 -17   0  175.68   13.50
  -2 -17   0  169.28   11.20
   2  17   0  172.88   17.70
  -2  17   0  179.68    9.30
   2  17   0  190.58   15.40
   2  17   0  228.78   20.10
   2  17   0  158.88   16.00
  -2  17   0  181.98   15.60
   3 -17   0  385.66   19.70
  -3 -17   0  367.46   17.00
  -3 -17   0  327.37   19.10
   3 -17   0  365.46   18.80
   3 -17   0  350.46   18.70
   3 -17   0  369.16   18.60
  -3  17   0  345.67   31.80
   3  17   0  373.46   23.10
   3  17   0  348.87   18.80
  -3  17   0  362.16   15.30
   3  17   0  365.06   19.20
   3  17   0  345.67   18.60
   4 -17   0  286.37   15.90
  -4 -17   0  273.27   13.20
  -4 -17   0  270.87   14.30
   4 -17   0  265.57   15.30
   4 -17   0  267.17   15.60
  -4 -17   0  277.47   21.30
   4  17   0  270.17   15.20
  -4  17   0  271.27   12.10
   4  17   0  230.28   15.60
   4  17   0  265.27   16.00
   4  17   0  284.27   21.30
   5 -17   0  280.97   15.50
   5 -17   0  269.87   15.50
  -5 -17   0  280.37   14.20
   5 -17   0  258.27   14.60
  -5 -17   0  266.27   13.50
   5  17   0  234.28   15.50
  -5  17   0  279.67   12.20
   5  17   0  278.67   14.60
   5  17   0  290.87   20.00
   6 -17   0   70.59    8.80
   6 -17   0   67.19    9.70
  -6 -17   0   62.59    7.00
  -6 -17   0   87.89    7.60
   6  17   0   71.89   10.70
   6  17   0   76.39   13.50
   6  17   0   70.79   15.20
  -6  17   0   69.19    5.50
   6  17   0   77.19    9.50
   7 -17   0  186.78   10.40
   7 -17   0  185.18    9.90
   7 -17   0  169.18   12.40
   7 -17   0  183.48   10.40
  -7 -17   0  171.08    9.30
  -7 -17   0  177.78    9.50
   7  17   0  175.58    9.90
   7  17   0  157.08   16.70
   7  17   0  172.38   14.50
   7  17   0  164.88   13.80
  -8 -17   0   24.10    4.20
   8 -17   0   28.50    3.90
   8 -17   0   37.60    5.20
   8  17   0   38.00    6.90
   0 -18   0   74.29   15.90
   0  18   0  123.69   15.20
   0  18   0  118.39   12.90
   1 -18   0  276.67   13.50
  -1 -18   0  271.17   15.70
   1 -18   0  319.17   19.30
  -1 -18   0  262.17   13.40
   1  18   0  223.28   21.70
   1  18   0  243.98   19.10
   1  18   0  274.27   18.80
  -2 -18   0   67.69    7.30
   2 -18   0   77.29   10.50
  -2 -18   0   62.09   10.60
   2 -18   0   79.89   10.60
   2  18   0   57.99    8.00
   2  18   0   59.59   10.20
   2  18   0   54.39    9.50
  -2  18   0   64.69    6.50
   3 -18   0  772.12   32.80
  -3 -18   0  727.23   32.10
  -3 -18   0  737.13   29.90
   3 -18   0  728.93   31.40
   3 -18   0  785.62   32.10
  -3 -18   0  775.12   30.40
   3  18   0  750.22   32.30
  -3  18   0  745.23   33.60
   3  18   0  716.63   32.40
  -3  18   0  790.22   29.20
   3  18   0  721.43   31.70
   3  18   0  747.53   35.30
   4 -18   0   99.79   10.10
  -4 -18   0   96.99    8.90
   4 -18   0  106.79   10.80
   4 -18   0  113.39   10.70
  -4 -18   0   83.69   16.00
   4  18   0   70.89   11.20
   4  18   0   97.89   11.20
   4  18   0   89.69   10.40
   4  18   0  110.89   10.40
   5 -18   0   74.99    9.30
   5 -18   0   95.39    8.90
  -5 -18   0   77.39    7.90
  -5 -18   0   71.49    7.20
   5 -18   0   71.39    9.60
   5  18   0   59.59    9.50
   5  18   0   76.29    9.90
  -5  18   0   76.59    5.90
   5  18   0   75.69   12.60
  -6 -18   0   80.19    7.10
  -6 -18   0   66.19    6.60
   6 -18   0   54.29    8.80
   6 -18   0   87.19    8.50
   6 -18   0   62.59    8.10
   6 -18   0   64.49    7.60
   6  18   0   68.99   12.80
   6  18   0   65.89    7.30
   6  18   0   70.29   14.20
   6  18   0   72.69    8.70
  -6  18   0   63.49    5.30
   7 -18   0   91.39   13.10
   7 -18   0   85.09    6.50
  -7 -18   0   78.09    6.50
  -7 -18   0   81.89    5.90
   7 -18   0   81.69    7.10
   7  18   0   95.09   13.70
   7  18   0   61.39   10.40
   7  18   0   67.89    5.90
  -7  18   0   71.69    5.70
  -8 -18   0    8.30    2.50
   8 -18   0    4.40    2.90
   8  18   0   11.00    4.80
   0 -19   0    1.40    4.10
   0 -19   0   -2.50    3.70
   0 -19   0   -0.20    5.60
   0 -19   0   -9.70    8.00
   0  19   0    2.80    5.50
   0  19   0    0.50    6.80
  -1 -19   0  163.78   12.60
   1 -19   0  158.78   12.40
  -1 -19   0  164.48   10.00
  -1 -19   0  183.88    9.80
   1 -19   0  182.18   13.80
   1 -19   0  152.78   10.30
  -1  19   0  163.38   13.20
   1  19   0  183.08   13.50
   1  19   0  136.09   16.20
  -1  19   0  189.28   14.50
   2 -19   0   99.49   11.50
   2 -19   0  115.79   10.90
  -2 -19   0  103.69   11.00
  -2 -19   0   94.29    8.20
  -2 -19   0  106.79    7.60
   2  19   0   79.69   11.10
   2  19   0   80.29   15.70
   2  19   0   73.89   10.60
  -2  19   0   81.59    8.00
  -2  19   0  117.29   12.60
  -3 -19   0  260.87   16.60
  -3 -19   0  271.97   13.80
   3 -19   0  292.37   20.80
   3 -19   0  253.97   18.40
   3 -19   0  273.07   15.80
  -3 -19   0  290.47   13.40
   3  19   0  267.27   28.30
   3  19   0  272.97   16.20
   3  19   0  265.77   17.60
  -3  19   0  279.37   12.70
   3  19   0  249.18   15.50
  -3  19   0  301.37   18.30
  -4 -19   0  105.09    8.30
   4 -19   0  111.49   16.90
  -4 -19   0  101.69   16.40
   4 -19   0  108.59   10.70
   4 -19   0  137.99   10.60
  -4 -19   0  108.39    8.80
   4  19   0  125.59   11.20
   4  19   0  116.89   16.60
   4  19   0  119.79   10.90
  -4  19   0  113.89    7.30
   5 -19   0   90.09   10.10
  -5 -19   0   83.39    7.30
   5 -19   0   76.89   12.80
   5 -19   0  108.19   14.90
   5  19   0  102.29   11.00
   5  19   0   74.19   15.70
   5  19   0   79.89   17.70
   5  19   0   74.09   13.30
  -5  19   0   82.19    6.30
  -6 -19   0   22.10    3.80
   6 -19   0   24.40    4.70
   6 -19   0   21.70    5.00
   6 -19   0   32.70    6.40
  -6 -19   0   28.70    5.20
   6  19   0   20.00    7.80
  -6  19   0   23.60    3.90
   6  19   0   14.80    6.40
   6  19   0   22.80    4.30
  -7 -19   0  185.68    9.70
   7 -19   0  173.68   12.50
  -7 -19   0  199.38    9.10
   7 -19   0  203.18    9.70
   7 -19   0  202.48   10.00
   7  19   0  192.88   12.50
   0 -20   0   29.80    6.20
   0 -20   0   57.69    9.10
   0 -20   0   48.10    8.70
   0 -20   0   49.40    6.60
   0  20   0   49.99    8.40
   0  20   0   37.10    6.90
   1 -20   0   54.69    7.70
  -1 -20   0   48.60    7.70
  -1 -20   0   40.00    6.70
   1 -20   0   52.89    7.60
  -1 -20   0   47.40    7.10
   1 -20   0   61.09    8.50
   1  20   0   49.40    9.00
  -1  20   0   54.29    8.10
   1  20   0   54.99    8.00
  -1  20   0   55.19   10.30
   2 -20   0   83.09   11.20
  -2 -20   0   62.39   10.70
   2 -20   0   56.29    8.80
  -2 -20   0   72.79    7.50
  -2 -20   0   75.29    7.20
   2  20   0   68.09   10.60
   2  20   0   83.29   10.50
  -2  20   0   67.39   12.50
   3 -20   0   39.20    7.60
  -3 -20   0   47.80    6.60
  -3 -20   0   44.10    7.00
   3 -20   0   35.60    8.20
  -3 -20   0   43.60    8.00
   3 -20   0   52.39    7.70
   3 -20   0   44.90    7.00
   3  20   0   42.50    7.70
   3  20   0   27.90    9.20
  -3  20   0   35.20    4.70
   3  20   0   51.89    9.60
   4 -20   0   65.79   12.10
  -4 -20   0   60.79    6.80
   4 -20   0   62.49    8.80
  -4 -20   0   77.89    7.20
   4 -20   0   63.39   10.90
   4 -20   0   55.09    7.80
  -4 -20   0   58.99   10.70
   4  20   0   60.39   12.00
  -4  20   0   59.89    6.40
   4  20   0   71.59    9.30
   5 -20   0  158.08   10.80
   5 -20   0  167.68   11.70
   5 -20   0  150.08   10.50
  -5 -20   0  162.98    9.20
  -5 -20   0  150.18    9.00
   5  20   0  151.78   10.40
   5  20   0  139.49   16.20
   5  20   0  152.98   10.70
  -5  20   0  138.19    8.30
   5  20   0  169.28   14.50
  -6 -20   0   14.30    3.60
   6 -20   0   22.60    8.00
  -6 -20   0   22.80    3.60
   6 -20   0   25.60    4.50
   6 -20   0   13.80    4.70
   6  20   0   15.90    3.90
   6  20   0   13.70    6.00
  -6  20   0   18.10    3.90
   7 -20   0   27.60    4.00
  -7 -20   0   33.10    4.20
   7  20   0   22.00    5.30
   0 -21   0    7.40    8.50
   0 -21   0    1.20    4.00
   0 -21   0    1.60    5.20
   0  21   0    7.40    5.60
   0  21   0   -2.40    6.90
  -1 -21   0  130.49    9.90
   1 -21   0  153.08   11.80
  -1 -21   0  122.29    8.80
   1 -21   0  132.39   12.80
  -1 -21   0  133.79   11.60
  -1  21   0  138.59   12.70
  -1  21   0  146.59   13.60
   1  21   0  151.28   12.30
   1  21   0  135.79   15.30
   2 -21   0  147.99   12.90
  -2 -21   0  162.78   10.00
  -2 -21   0  151.68    9.60
   2 -21   0  155.58   12.00
  -2 -21   0  170.18   13.00
   2  21   0  169.98   16.00
  -2  21   0  155.28   13.60
  -2  21   0  162.08   13.00
   2  21   0  145.79   11.80
  -3 -21   0   79.29    7.70
  -3 -21   0   86.29    7.50
  -3 -21   0   63.69   11.50
   3 -21   0   70.29   10.90
   3 -21   0   83.19    9.40
   3  21   0   98.09   15.90
   3  21   0   84.59    9.60
   3  21   0   96.99   14.80
   4 -21   0  193.08   12.60
  -4 -21   0  182.98   16.50
   4 -21   0  184.28   14.10
   4 -21   0  198.88   12.60
  -4 -21   0  189.98   10.40
  -4 -21   0  186.78   10.40
   4  21   0  176.48   16.60
   4  21   0  206.38   12.10
   4  21   0  179.38   12.20
   5 -21   0    6.10    4.70
  -5 -21   0   12.70    3.40
   5 -21   0   11.20    4.60
  -5 -21   0    8.60    3.60
   5 -21   0    7.30    4.30
   5  21   0    4.60    4.60
   5  21   0   12.70    4.30
   5  21   0    6.10    6.10
   5  21   0   17.10    8.00
   6 -21   0   61.09    8.30
  -6 -21   0   51.49    4.70
   6 -21   0   53.09    9.00
   6 -21   0   39.50    7.10
  -6 -21   0   39.80    6.20
   6  21   0   54.69    8.60
  -7 -21   0   76.79    5.80
   7  21   0   70.49    7.80
   0 -22   0  420.26   18.50
   0 -22   0  466.85   23.90
   0 -22   0  437.96   21.00
   0  22   0  452.45   21.60
   0  22   0  429.96   22.70
   1 -22   0  103.39   10.60
  -1 -22   0   98.09    7.50
  -1 -22   0  104.29   10.60
  -1 -22   0   72.09    9.90
   1 -22   0   64.09   12.10
   1  22   0   85.79   10.70
  -1  22   0   90.19   12.60
   1  22   0  111.59   14.60
  -1  22   0   98.09   11.50
   2 -22   0   72.19   10.40
  -2 -22   0   79.79    6.90
  -2 -22   0   88.19   11.50
  -2 -22   0   61.69    8.10
   2 -22   0   67.69   10.40
  -2  22   0   74.69   10.80
   2  22   0   95.79   13.90
  -2  22   0   77.19   12.50
   2  22   0   87.09    9.80
  -3 -22   0   17.70    4.30
   3 -22   0   30.50    7.60
   3 -22   0   21.80    6.10
  -3 -22   0   23.20    6.50
  -3 -22   0   25.00    5.80
   3  22   0   31.30    8.60
  -3  22   0   15.40    5.60
  -3  22   0   16.60    7.50
  -4 -22   0  167.38    8.90
  -4 -22   0  161.88    9.50
   4 -22   0  187.78   13.60
  -4 -22   0  156.38   17.80
   4 -22   0  158.18   10.70
   4  22   0  162.78   11.90
   4  22   0  152.88   15.30
   4  22   0  147.19   11.10
  -5 -22   0   28.00    4.40
   5 -22   0   33.80    6.40
  -5 -22   0   37.30    4.70
   5 -22   0   39.20    6.90
  -5  22   0   28.20    5.10
   5  22   0   26.70    6.10
   5  22   0   40.70    6.80
   5  22   0   19.70   13.70
   6 -22   0  130.49    8.50
  -6 -22   0  123.79    6.50
   6 -22   0  121.89    8.50
   6  22   0  116.29    9.60
  -6  22   0  117.79   14.00
   0 -23   0    0.00    8.90
   0 -23   0   -3.20    5.30
   0  23   0    4.50    5.70
   0  23   0    0.70    7.50
   1 -23   0  180.68   13.50
  -1 -23   0  179.98   12.60
  -1 -23   0  179.28    9.70
   1 -23   0  174.98   13.60
   1  23   0  168.98   15.70
  -1  23   0  187.78   14.40
   1  23   0  167.38   15.20
  -2 -23   0  212.28   10.70
  -2 -23   0  174.08   12.20
  -2 -23   0  217.48   13.40
   2 -23   0  209.98   13.30
   2 -23   0  230.38   13.40
   2  23   0  225.68   14.20
  -2  23   0  213.78   14.80
   2  23   0  232.88   17.40
  -2  23   0  227.08   14.60
  -3 -23   0   80.09    6.50
  -3 -23   0   76.29   10.20
   3 -23   0   83.09   10.50
   3 -23   0   88.29    9.00
  -3 -23   0   91.99   11.30
  -3  23   0   95.49   12.40
  -3  23   0  100.19   10.50
   3  23   0   98.79   14.10
   3  23   0   96.49    8.90
  -4 -23   0   10.90    3.10
  -4 -23   0    9.20    4.30
   4 -23   0   12.40    4.50
   4  23   0   17.90    4.20
  -4  23   0    6.30    4.90
   4  23   0   10.30    5.30
   5 -23   0   92.79    7.90
   5 -23   0   90.49   10.80
  -5 -23   0   87.29    5.70
  -5  23   0   96.69    9.00
   5  23   0   95.69    9.30
   6  23   0   73.79    7.40
   0 -24   0   57.19    8.70
   0  24   0   48.60    8.70
   0  24   0   48.90    8.30
  -1 -24   0  147.69   11.00
   1 -24   0  151.18   11.30
  -1 -24   0  140.39   12.70
   1 -24   0  140.19   14.60
   1  24   0  136.29   10.70
   1  24   0  117.39   15.10
  -1  24   0  150.68   13.60
  -1  24   0  150.38   11.70
  -2 -24   0  154.18    8.00
  -2 -24   0  122.09   10.30
   2 -24   0  136.19   10.40
   2 -24   0  124.19   10.70
   2  24   0  136.59    9.70
  -2  24   0  135.99   12.10
  -2  24   0  131.59   11.40
   2  24   0   95.69   15.00
   3 -24   0   25.60    6.00
  -3 -24   0   31.70    5.00
   3 -24   0   25.90    5.00
  -3 -24   0   33.10    6.20
   3  24   0   35.70    6.60
  -3  24   0   22.30    7.10
  -3  24   0   24.20    6.20
   4 -24   0  154.48    9.40
  -4 -24   0  152.48    8.10
   4  24   0  162.08   11.80
   4  24   0  166.88    9.30
  -4  24   0  156.18   11.70
  -5 -24   0    0.80    2.70
   5 -24   0    8.10    4.60
   5 -24   0    0.50    3.60
   5  24   0    1.00    5.00
   0 -25   0   -1.70    4.20
   0  25   0   -3.20    4.10
   1 -25   0   72.39    8.10
  -1 -25   0   92.39    8.30
   1 -25   0   87.19   11.10
   1  25   0   66.99    9.70
  -1  25   0   59.29   12.60
  -1  25   0   82.69    8.80
   1  25   0   80.09    8.00
   2 -25   0   14.50    4.60
  -2 -25   0   15.10    4.70
   2 -25   0   14.80    5.10
  -2  25   0   18.60    5.80
   2  25   0   12.50    4.20
  -2  25   0   31.70   10.90
   3 -25   0   -6.70    5.50
  -3 -25   0   12.80    3.50
  -3 -25   0    6.40    6.00
   3 -25   0    8.60    4.10
  -3  25   0   -1.30    7.00
   3  25   0    3.90    3.70
  -3  25   0    6.60    6.70
   4 -25   0   66.89    6.70
   4  25   0   78.49    7.90
   4  25   0   55.39    8.20
   0 -26   0   39.80    6.70
   0  26   0   27.60    5.10
   1 -26   0   71.59    7.50
  -1 -26   0   70.29    7.40
   1  26   0   66.49    7.20
  -1  26   0   63.29    8.20
   2 -26   0  195.58   11.60
   2 -26   0  172.18   11.90
  -2 -26   0  167.58   11.10
  -2  26   0  206.28   12.00
   2  26   0  182.88    9.90
   3 -26   0   40.60    7.20
   3  26   0   30.30    4.00
   3  26   0   26.20    5.20
   4 -26   0  119.49   11.80
   4  26   0   93.99    8.50
   0 -27   0   -6.40    5.10
   0  27   0   -1.10    4.80
   1 -27   0   11.40    4.00
  -1 -27   0   19.60    4.10
   1  27   0   18.70    6.10
  -1  27   0   15.60    4.60
   2 -27   0    2.60    4.50
  -2 -27   0    0.20    4.60
  -2  27   0   13.40    5.70
   2  27   0    0.10    4.80
   2  27   0    0.70    3.70
   0 -28   0  106.39    6.90
   0  28   0   94.29    7.40
   1  28   0   35.40    4.20
 -10   0   1    3.40    2.30
  10   0  -1    0.80    4.10
  10   0  -1    0.50    4.50
 -10   0   1    6.40    2.40
  10   0  -1    1.10    3.40
  -9   0   1   13.30    3.80
   9   0  -1   14.70    4.90
   9   0  -1   23.90    6.50
  -9   0   1   13.00    3.20
   8   0  -1   -6.70    4.10
   8   0  -1    1.10    6.10
  -8   0   1   -2.80    4.50
   8   0  -1    2.80    8.30
   8   0  -1   -0.30    6.50
  -8   0   1    1.00    3.60
   8   0  -1    7.80    6.10
   7   0  -1    3.40    9.90
  -7   0   1   -5.50    6.70
  -7   0   1    0.10    3.10
   7   0  -1    3.60   11.40
  -6   0   1   76.49    9.30
   6   0  -1   79.99   14.60
  -6   0   1   55.29   25.60
   6   0  -1   86.69   11.70
   6   0  -1  101.79    9.90
   6   0  -1   99.49   12.80
   6   0  -1   73.39   11.90
  -5   0   1  232.98   28.30
  -5   0   1  277.17   25.70
  -5   0   1  244.78   12.00
  -4   0   1   81.79   14.10
  -4   0   1   77.69   14.20
  -3   0   1  160.58   12.60
   3   0  -1  135.69   16.20
   3   0  -1  163.88   15.80
  -3   0   1  154.48   12.40
   2   0  -1 2007.20   87.19
   2   0  -1 2283.67   85.79
  -2   0   1 2366.16   85.69
   2   0  -1 2385.06   83.99
  -2   0   1 2310.27   85.59
   1   0  -1 2845.72  107.39
  -1   0   1 2998.40  106.59
   1   0  -1 2871.51  107.19
  -1   0   1 2956.50  107.19
   1   0  -1 2913.81  106.69
   0   0  -1 1297.47   45.00
   0   0  -1 1167.08   47.00
   0   0  -1 1227.48   45.20
  -1   0  -1  133.29    8.40
  -1   0  -1  154.88    8.50
  -2   0  -1  813.02   30.80
   2   0   1  785.62   30.20
  -2   0  -1  774.92   31.50
  -2   0  -1  803.72   34.00
  -3   0  -1  893.91   41.30
  -3   0  -1  945.61   37.00
   3   0   1  903.41   36.20
  -4   0  -1  454.05   31.90
  -4   0  -1  506.85   24.80
   5   0   1  196.18   15.00
  -5   0  -1  152.28   27.30
   5   0   1  187.68   16.70
  -5   0  -1  194.48   39.40
  -5   0  -1  200.88   24.00
  -6   0  -1  115.49    9.50
   6   0   1  120.79   12.20
   6   0   1  111.79   12.50
   6   0   1  120.39   11.90
   6   0   1  112.39   13.10
  -7   0  -1  596.04   24.40
   7   0   1  593.14   27.20
   7   0   1  589.34   26.30
   7   0   1  577.74   28.30
   8   0   1  270.37   15.00
  -8   0  -1  253.87   13.90
   8   0   1  259.97   16.10
   8   0   1  243.38   14.90
   9   0   1    1.00    3.90
  -9   0  -1    1.70    3.90
   9   0   1    0.50    3.60
  -9   0  -1    2.10    3.20
  10   0   1    4.20    3.00
  10   0   1    4.20    3.10
 -10  -1   1   31.50    4.40
  10  -1  -1   39.20    5.90
  10  -1  -1   28.00    6.90
 -10  -1   1   45.30    4.20
  10   1  -1   29.50    6.10
  10   1  -1   42.60    8.00
 -10   1   1   35.20    3.90
  10   1  -1   50.79    7.80
 -10   1   1   33.80    4.40
   9  -1  -1  135.29   11.00
  -9  -1   1  124.19    7.70
  -9  -1   1  113.49    8.10
   9  -1  -1  116.29    9.80
   9  -1  -1  125.19   10.70
   9   1  -1  116.19   11.50
   9   1  -1  124.79   10.40
   9   1  -1  112.29   11.60
  -9   1   1  114.79    8.00
  -9   1   1  119.59    7.40
  -8  -1   1  326.07   16.10
   8  -1  -1  330.97   18.90
   8  -1  -1  335.17   14.90
  -8  -1   1  324.37   16.20
   8  -1  -1  335.37   17.20
   8  -1  -1  314.87   19.20
  -8   1   1  321.27   15.80
   8   1  -1  318.27   17.50
   8   1  -1  328.57   15.20
   8   1  -1  317.57   18.60
   8   1  -1  315.27   18.40
   8   1  -1  288.17   19.20
  -8   1   1  324.97   16.00
   7  -1  -1    4.20    8.20
   7  -1  -1    8.10   10.50
  -7  -1   1   32.20    7.30
   7  -1  -1   11.00   11.70
  -7  -1   1   13.90    4.10
  -7   1   1   22.10    4.20
   7   1  -1   16.50    8.50
   7   1  -1   17.30    9.30
   7   1  -1    5.50   10.50
  -7   1   1   24.60    7.10
   6  -1  -1   68.69    9.30
  -6  -1   1   59.69   25.50
   6  -1  -1   83.79   14.50
   6  -1  -1   78.29   13.00
   6  -1  -1   67.39   12.30
   6  -1  -1   57.79   11.00
   6  -1  -1   84.29   12.10
   6   1  -1   67.39    9.50
   6   1  -1   65.59   12.90
   6   1  -1   80.69   15.40
   6   1  -1   69.99   12.00
   6   1  -1   69.59   11.50
  -6   1   1   77.39   26.80
  -5  -1   1  379.36   28.60
  -5  -1   1  372.96   16.70
  -5  -1   1  401.46   31.60
  -5   1   1  429.66   30.50
  -5   1   1  375.76   16.50
  -5   1   1  393.46   32.40
  -4  -1   1 2712.13  109.59
  -4  -1   1 2844.52  108.49
  -4   1   1 2803.62  110.49
  -4   1   1 2828.92  109.19
   3  -1  -1  369.56   22.50
  -3  -1   1  350.56   19.30
   3  -1  -1  348.17   21.90
  -3  -1   1  357.86   18.70
   3   1  -1  318.47   21.90
   3   1  -1  332.87   22.10
  -3   1   1  356.66   19.20
   2  -1  -1 3469.15  149.99
   2  -1  -1 4086.09  148.69
  -2  -1   1 3638.04  147.29
  -2  -1   1 4153.68  148.49
  -2  -1   1 4076.69  148.39
   2  -1  -1 4055.29  147.19
  -2   1   1 4253.37  148.79
   2   1  -1 3681.83  150.18
   2   1  -1 4600.64  147.29
   2   1  -1 3981.60  148.79
  -2   1   1 4252.97  148.89
   1  -1  -1 3447.66  130.99
  -1  -1   1 3407.76  131.29
  -1  -1   1 3378.06  131.59
  -1  -1   1 3758.22  131.09
   1  -1  -1 3540.55  130.49
   1   1  -1 3562.34  131.19
   1   1  -1 3684.13  131.59
   1   1  -1 3465.55  130.69
  -1   1   1 3974.80  130.59
  -1   1   1 3605.34  131.19
   0  -1  -1 1677.13   57.59
   0  -1  -1 1543.65   56.89
   0  -1   1 1451.85   58.89
   0  -1   1 1613.74   56.99
   0   1  -1 1557.14   57.09
   0   1  -1 1529.95   56.59
   0   1   1 1618.84   57.69
   0   1  -1 1457.05   58.69
   1  -1   1 6127.99  215.18
  -1  -1  -1 6173.68  216.88
   1  -1   1 5271.57  217.28
  -1  -1  -1 5590.14  218.38
  -1   1  -1 6348.96  215.28
  -1   1  -1 6203.18  215.38
  -1   1  -1 6043.00  217.28
  -2  -1  -1 2119.69   85.79
   2  -1   1 2258.97   84.09
  -2  -1  -1 2225.48   87.19
  -2  -1  -1 2400.76   84.19
  -2   1  -1 2384.96   84.99
  -2   1  -1 2360.56   84.99
  -2   1  -1 2302.07   87.99
   3  -1   1  739.23   30.60
  -3  -1  -1  772.92   30.40
  -3  -1  -1  731.93   34.80
   3   1   1  706.33   30.10
  -3   1  -1  773.62   31.50
  -3   1  -1  715.73   35.60
  -4  -1  -1  304.77   17.90
  -4  -1  -1  248.58   25.40
  -4   1  -1  286.57   19.60
  -4   1  -1  301.87   21.30
  -4   1  -1  255.97   26.10
   5  -1   1  559.64   25.70
  -5  -1  -1  505.25   63.49
   5  -1   1  536.05   28.00
  -5  -1  -1  528.55   47.50
   5   1   1  554.94   26.80
  -5   1  -1  612.94   49.99
   5   1   1  519.45   28.00
  -5   1  -1  608.84   34.70
   6  -1   1  490.75   25.50
   6  -1   1  542.15   24.00
   6  -1   1  545.35   25.00
   6  -1   1  509.45   24.40
  -6  -1  -1  502.75   22.10
  -6   1  -1  508.45   22.00
   6   1   1  564.64   26.30
   6   1   1  515.45   25.10
   6   1   1  471.95   25.60
   6   1   1  496.25   24.50
  -7  -1  -1  409.16   18.60
   7  -1   1  416.86   20.90
   7  -1   1  413.36   22.20
   7  -1   1  430.36   20.30
  -7   1  -1  426.66   18.50
   7   1   1  400.26   22.70
   7   1   1  425.16   21.60
   7   1   1  405.26   20.60
   7   1   1  411.46   21.60
   8  -1   1   86.09    9.40
   8  -1   1   78.79    9.90
  -8  -1  -1   70.89    7.50
   8  -1   1   73.99    9.40
   8   1   1   73.89   10.40
   8   1   1   82.39   10.60
  -8   1  -1   76.59    7.30
   8   1   1   62.59    9.70
   9  -1   1   17.30    4.40
   9  -1   1   20.20    4.10
  -9  -1  -1   24.70    4.00
   9   1   1   21.10    4.60
   9   1   1   32.50    7.00
  -9   1  -1   33.80    5.90
  -9   1  -1   24.30    4.90
  10  -1   1   13.40    3.10
  10   1   1    9.00    3.30
  10   1   1   13.70    3.30
  10  -2  -1    6.10    4.40
  10  -2  -1    4.00    3.40
  10  -2  -1    2.60    3.60
 -10  -2   1    6.30    2.50
 -10  -2   1    6.60    2.50
 -10   2   1    4.30    2.20
 -10   2   1    4.50    2.40
  10   2  -1    6.10    5.10
  10   2  -1    4.50    3.70
  10   2  -1    5.80    5.90
   9  -2  -1   69.09    8.20
   9  -2  -1   75.69    8.90
   9  -2  -1   77.99    9.70
  -9  -2   1   79.59    7.10
  -9  -2   1   74.39    6.50
   9   2  -1   72.09   10.10
  -9   2   1   57.69    6.30
   9   2  -1   83.79   10.10
   9   2  -1   97.29    9.90
  -9   2   1   66.19    5.70
  -8  -2   1   90.99    9.60
  -8  -2   1  103.59   10.60
   8  -2  -1  103.99   11.40
   8  -2  -1   68.69    9.50
   8  -2  -1   78.89   11.50
   8  -2  -1   70.59    7.70
   8  -2  -1   85.29    9.90
   8   2  -1   78.29   11.50
   8   2  -1  108.49   11.30
  -8   2   1   96.39    8.60
   8   2  -1   96.99   12.40
   8   2  -1   96.19   12.10
   8   2  -1   96.49    8.60
  -8   2   1   80.89   10.30
   7  -2  -1   19.40    6.10
  -7  -2   1   21.60    4.30
   7  -2  -1   16.40   10.10
   7  -2  -1   22.40    7.60
  -7  -2   1   22.30    7.60
   7  -2  -1   24.90    6.80
   7   2  -1   23.80    7.40
   7   2  -1   12.00    7.00
  -7   2   1   23.50    4.00
   7   2  -1   26.20    7.80
  -7   2   1   27.30    6.50
   6  -2  -1  358.36   18.50
  -6  -2   1  311.87   42.80
   6  -2  -1  364.56   17.10
   6  -2  -1  313.07   21.20
   6  -2  -1  341.87   20.70
   6  -2  -1  382.26   19.50
   6  -2  -1  339.97   20.00
  -6   2   1  348.57   47.60
  -6   2   1  374.16   17.40
   6   2  -1  370.76   19.80
   6   2  -1  300.27   21.60
   6   2  -1  359.06   20.60
   6   2  -1  364.76   17.80
   6   2  -1  360.36   19.70
  -5  -2   1  169.98   37.20
  -5  -2   1  150.38   26.70
  -5  -2   1  188.08   23.40
  -5  -2   1  169.48    9.70
  -5   2   1  154.38    9.30
  -5   2   1  193.48   25.80
  -5   2   1  204.98   29.40
  -4  -2   1 2029.90   83.29
  -4  -2   1 1987.60   85.09
  -4   2   1 2306.67   87.59
  -4   2   1 2128.29   85.09
   3  -2  -1   15.50    9.30
  -3  -2   1   15.40    4.90
   3  -2  -1   18.70    4.10
  -3  -2   1   20.70    6.50
  -3  -2   1   21.20    5.80
   3  -2  -1   14.70    3.10
  -3   2   1   20.70    6.80
  -3   2   1   26.00    6.80
   3   2  -1   16.30    9.50
   3   2  -1    7.80    9.70
  -2  -2   1  499.45   21.80
  -2  -2   1  456.35   21.60
  -2  -2   1  466.45   21.40
   2  -2  -1  532.05   22.90
  -2   2   1  523.95   22.50
   2   2  -1  470.95   22.60
   2   2  -1  489.95   22.90
  -2   2   1  516.15   22.30
  -1  -2   1 8209.68  305.47
  -1  -2   1 8279.97  305.77
   1  -2  -1 8496.55  304.77
  -1  -2   1 8814.92  304.37
   1   2  -1 8177.18  304.57
  -1   2   1 8549.34  304.07
   1   2  -1 8732.23  306.77
  -1   2   1 8055.59  305.57
   0  -2   1 3264.97  115.79
   0  -2  -1 3412.26  116.79
   0  -2   1 3391.86  115.69
   0  -2  -1 3219.38  115.49
   0  -2   1 2980.30  117.69
   0   2   1 3197.48  115.59
   0   2  -1 3232.28  115.69
   0   2  -1 3173.08  115.79
   0   2  -1 2881.91  118.59
   0   2   1 3178.58  116.99
   0   2  -1 3173.98  115.59
   0   2   1 3021.70  115.29
  -1  -2  -1 2412.56   79.79
   1  -2   1 2341.97   80.39
  -1  -2  -1 2168.58   83.49
   1  -2   1 2070.49   82.49
  -1  -2  -1 1874.41   81.69
   1   2   1 2222.68   81.29
  -1   2  -1 2342.77   80.39
  -1   2  -1 2101.29   82.99
   1   2   1 2173.98   79.89
  -2  -2  -1  256.37   18.00
  -2  -2  -1  284.67   12.10
   2  -2   1  275.27   12.80
  -2  -2  -1  273.67   15.00
   2   2   1  282.37   11.70
  -2   2  -1  286.17   12.80
  -2   2  -1  270.37   13.40
   2   2   1  260.17   16.30
   2   2   1  263.87   12.70
  -2   2  -1  280.57   15.00
  -2   2  -1  264.67   16.40
  -3  -2  -1  303.27   14.00
  -3  -2  -1  254.87   23.20
  -3  -2  -1  251.87   14.90
  -3  -2  -1  314.87   14.60
  -3  -2  -1  264.07   18.60
   3  -2   1  277.37   16.30
  -3   2  -1  293.67   15.80
  -3   2  -1  306.67   21.10
   3   2   1  281.87   16.20
  -3   2  -1  281.57   16.60
  -4  -2  -1  231.78   15.40
  -4  -2  -1  210.58   23.50
  -4  -2  -1  208.78   31.70
  -4   2  -1  173.28   26.10
  -4   2  -1  204.78   21.50
  -4   2  -1  213.98   19.00
   5  -2   1   26.00    8.10
  -5  -2  -1    5.10   22.20
  -5  -2  -1   15.90   35.50
   5  -2   1   24.10    7.00
   5  -2   1   28.60    7.80
  -5  -2  -1   24.50   12.60
  -5   2  -1   30.80   16.90
  -5   2  -1   43.40   24.80
   5   2   1   40.30    9.40
   5   2   1   26.40    7.60
   6  -2   1  428.76   23.00
   6  -2   1  475.95   21.30
  -6  -2  -1  420.56   19.70
   6  -2   1  431.36   23.10
   6  -2   1  441.26   21.60
   6  -2   1  440.16   26.40
   6   2   1  444.66   22.20
  -6   2  -1  451.55   19.30
   6   2   1  405.56   23.40
   6   2   1  448.66   23.20
   6   2   1  481.25   22.70
  -7  -2  -1   63.99    8.70
   7  -2   1   80.99    9.90
   7  -2   1   86.09   10.30
   7  -2   1   78.49   11.20
  -7   2  -1   92.69    7.90
   7   2   1   81.09   11.10
   7   2   1   98.19   11.80
   7   2   1   70.49   11.70
   7   2   1   90.39   11.80
   8  -2   1    3.40    4.80
   8  -2   1    6.00    4.90
  -8  -2  -1   14.20    4.10
   8  -2   1    3.30    5.10
   8   2   1   10.70    5.70
  -8   2  -1   11.50    3.40
   8   2   1   12.90    5.80
   8   2   1    3.70    6.70
  -9  -2  -1  104.49    8.50
   9  -2   1  118.69    8.20
   9  -2   1  117.29    8.90
  -9  -2  -1  124.09    7.40
  -9   2  -1  106.39    7.30
   9   2   1  119.29    9.00
   9   2   1  116.69    9.70
  -9   2  -1  101.49    9.00
  10  -2   1   68.19    5.30
  10  -2   1   71.59    6.40
  10   2   1   58.59    5.60
  10   2   1   68.29    6.00
  10  -3  -1  100.39    9.00
 -10  -3   1   72.59    5.60
 -10  -3   1   84.49    5.70
  10   3  -1   85.79    7.20
 -10   3   1   80.29    5.30
 -10   3   1   80.79    4.90
  10   3  -1   80.39    9.40
  10   3  -1   78.39    9.10
   9  -3  -1  209.58   12.00
  -9  -3   1  192.28   10.40
   9  -3  -1  215.38   13.20
   9  -3  -1  208.08   12.50
  -9  -3   1  203.88   10.90
  -9   3   1  199.28   10.20
   9   3  -1  197.78   14.30
   9   3  -1  213.08   13.90
   9   3  -1  211.18   13.30
  -9   3   1  198.38    9.90
   8  -3  -1  498.65   24.30
   8  -3  -1  479.95   23.40
   8  -3  -1  478.45   23.80
   8  -3  -1  491.75   20.60
   8  -3  -1  496.65   22.70
  -8  -3   1  477.85   22.00
   8   3  -1  507.65   24.80
   8   3  -1  513.05   24.70
   8   3  -1  511.15   24.70
   8   3  -1  486.15   25.50
   8   3  -1  511.45   20.90
  -8   3   1  488.55   21.30
  -7  -3   1  319.57   14.60
   7  -3  -1  248.78   24.30
   7  -3  -1  294.87   16.40
  -7  -3   1  270.97   18.10
   7  -3  -1  283.77   17.70
   7  -3  -1  303.37   16.40
  -7   3   1  315.47   14.10
   7   3  -1  305.17   18.80
   7   3  -1  277.87   20.50
   7   3  -1  364.96   21.00
   7   3  -1  318.77   18.30
   7   3  -1  281.07   19.70
  -7   3   1  321.77   17.70
  -6  -3   1  106.09    7.90
   6  -3  -1   89.09   13.70
   6  -3  -1   95.59    9.10
   6  -3  -1   93.09   14.00
  -6  -3   1   79.19   28.30
   6  -3  -1   91.49   11.60
   6  -3  -1  103.29   11.00
   6  -3  -1  112.89   12.80
   6   3  -1  103.09   13.60
   6   3  -1   86.49   15.60
  -6   3   1   97.99    7.30
   6   3  -1   88.59   13.40
  -6   3   1   79.59   12.90
   6   3  -1  121.19   12.00
   6   3  -1   90.29   11.00
  -5  -3   1   98.29   19.70
  -5  -3   1  101.39    8.00
  -5  -3   1  147.39   22.20
  -5  -3   1  104.19   27.80
  -5   3   1  127.59    7.50
  -5   3   1  141.89   23.30
  -5   3   1   84.29   18.70
  -4  -3   1 1566.54   64.59
  -4   3   1 1601.04   66.79
  -3  -3   1  999.10   42.30
   3  -3  -1  971.70   43.50
  -3  -3   1 1005.90   41.80
   3  -3  -1 1164.28   39.60
  -3  -3   1  900.41   41.10
  -3  -3   1  897.31   45.70
  -3   3   1 1043.90   43.80
   3   3  -1  986.00   45.00
   3   3  -1  973.10   45.80
  -3   3   1 1084.19   43.80
  -2  -3   1 1485.15   55.39
   2  -3  -1 1437.76   55.79
  -2  -3   1 1316.27   57.59
  -2  -3   1 1361.46   55.99
  -2  -3   1 1456.75   55.29
  -2   3   1 1517.35   56.09
  -2   3   1 1475.85   56.19
  -2   3   1 1331.27   57.89
   2   3  -1 1430.36   56.49
   2   3  -1 1438.56   56.49
   1  -3  -1 1352.36   55.79
  -1  -3   1 1450.95   55.29
  -1  -3   1 1487.85   54.49
  -1  -3   1 1358.26   55.89
  -1  -3   1 1531.25   54.09
   1  -3  -1 1409.66   54.39
  -1   3   1 1477.15   55.89
   1   3  -1 1440.16   54.99
   1   3  -1 1401.66   54.39
  -1   3   1 1453.85   54.79
   1   3  -1 1277.47   55.49
   1   3  -1 1578.44   55.69
   0  -3   1 1118.99   40.30
   0  -3  -1 1139.69   41.20
   0  -3  -1  991.40   39.20
   0  -3   1 1012.90   41.90
   0  -3   1 1100.49   39.50
   0  -3  -1  907.61   40.00
   0   3  -1 1008.20   39.70
   0   3   1  986.60   39.20
   0   3   1 1075.09   41.60
   0   3  -1 1056.29   40.00
   0   3   1 1058.99   38.20
   0   3  -1 1024.50   41.20
   0   3   1 1054.69   39.50
  -1  -3  -1  426.96   16.40
   1  -3   1  412.06   17.00
  -1  -3  -1  378.06   16.80
  -1  -3  -1  407.86   19.90
   1  -3   1  398.66   17.10
   1  -3   1  396.06   19.60
   1   3   1  387.56   17.00
  -1   3  -1  345.67   18.60
   1   3   1  376.56   17.30
   1   3   1  420.26   18.10
  -1   3  -1  435.96   17.20
  -1   3  -1  440.16   18.70
  -1   3  -1  433.26   17.20
   2  -3   1  425.06   22.60
  -2  -3  -1  530.45   19.80
  -2  -3  -1  467.35   25.90
   2  -3   1  476.95   20.90
  -2  -3  -1  496.05   22.10
   2   3   1  457.75   20.80
  -2   3  -1  476.85   20.70
  -2   3  -1  536.25   21.30
  -2   3  -1  479.35   21.20
   2   3   1  454.45   23.40
  -3  -3  -1   31.00    8.30
  -3  -3  -1   58.49    7.50
  -3  -3  -1   33.80   11.40
  -3  -3  -1   59.19    9.60
   3  -3   1   42.80    8.30
   3   3   1   44.80    8.60
  -3   3  -1   44.60    7.80
  -3   3  -1   42.70    7.50
  -3   3  -1   47.80   11.60
   3   3   1   55.49    8.10
  -4  -3  -1  345.17   18.70
  -4  -3  -1  290.57   35.10
  -4  -3  -1  317.37   26.80
  -4   3  -1  351.96   23.60
  -4   3  -1  328.47   28.70
   5  -3   1   36.40    7.30
  -5  -3  -1   91.99   28.20
   5  -3   1   35.40    8.00
   5  -3   1   54.99    9.90
  -5  -3  -1   43.40   13.10
  -5  -3  -1   64.79   36.50
  -5   3  -1   49.00   19.70
   5   3   1   45.00   15.90
   5   3   1   52.39    9.00
   5   3   1   41.90    9.20
   6  -3   1  185.78   15.30
   6  -3   1  197.48   14.70
   6  -3   1  205.08   12.80
   6  -3   1  195.48   15.40
  -6  -3  -1  198.78   12.20
   6  -3   1  207.18   13.30
   6   3   1  190.78   14.30
   6   3   1  211.98   16.40
   6   3   1  199.38   15.40
  -6   3  -1  199.58   11.30
   6   3   1  183.58   14.80
   6   3   1  188.88   16.60
   7  -3   1   42.80    7.10
   7  -3   1   32.20    6.70
   7  -3   1   36.00    8.50
   7  -3   1   50.49    8.80
   7  -3   1   38.20    6.00
  -7  -3  -1   52.79    7.90
   7   3   1   46.50    8.50
   7   3   1   66.49   11.30
  -7   3  -1   35.60    6.80
   7   3   1   50.29    8.20
   7   3   1   43.40    8.00
   8  -3   1    6.00    4.80
   8  -3   1   12.50    4.80
   8  -3   1   11.20    4.90
  -8  -3  -1   11.10    4.00
  -8   3  -1   13.60    5.70
   8   3   1    9.70    6.00
  -8   3  -1    8.10    3.30
   8   3   1   21.60    6.10
   9  -3   1   78.69    7.10
  -9  -3  -1   65.59    8.10
   9  -3   1   85.49    7.40
  -9  -3  -1   68.59    6.40
  -9   3  -1   68.19    6.00
   9   3   1   78.79    8.20
  -9   3  -1   71.49    6.00
   9   3   1   82.29    8.40
  10  -3   1   12.40    3.20
  10   3   1   22.70    5.30
  10   3   1   16.30    3.50
  10  -4  -1    5.00    5.00
 -10  -4   1   10.40    2.70
  10  -4  -1   10.10    4.10
 -10  -4   1    8.50    2.80
  10   4  -1   10.40    3.90
 -10   4   1   10.60    2.10
  10   4  -1   10.90    5.40
 -10   4   1    7.00    2.30
   9  -4  -1   42.50    7.70
   9  -4  -1   52.39   10.90
   9  -4  -1   41.20    8.30
  -9  -4   1   50.19    6.50
  -9  -4   1   40.10    5.80
   9  -4  -1   47.90    6.90
   9   4  -1   39.60    7.10
  -9   4   1   44.90    5.30
  -9   4   1   44.70    4.90
   9   4  -1   57.29    9.90
   9   4  -1   65.79    9.90
   8  -4  -1  174.18    9.80
   8  -4  -1  142.09   16.10
   8  -4  -1  152.68   11.40
  -8  -4   1  164.58   11.40
   8  -4  -1  157.08   12.90
   8  -4  -1  160.18   13.10
   8  -4  -1  164.98   13.00
  -8  -4   1  179.28   10.30
  -8   4   1  161.98    9.30
  -8   4   1  159.48   10.10
   8   4  -1  189.68   13.50
   8   4  -1  168.98   14.00
   8   4  -1  170.78   15.20
   8   4  -1  181.38   10.40
   8   4  -1  164.68   13.00
   8   4  -1  170.08   13.90
   7  -4  -1   31.70    6.00
   7  -4  -1   32.80    7.40
   7  -4  -1   31.30    7.00
  -7  -4   1   34.10    4.90
   7  -4  -1   38.00    5.10
   7  -4  -1   33.30    7.50
   7   4  -1   45.30    9.20
   7   4  -1   26.40    7.00
   7   4  -1   30.20    7.80
   7   4  -1   20.30    5.50
  -7   4   1   36.80    5.50
  -7   4   1   35.60    7.80
   7   4  -1   47.10    8.40
   7   4  -1   31.70    7.70
   6  -4  -1  208.78   20.40
   6  -4  -1  197.68   14.30
  -6  -4   1  188.68   10.40
   6  -4  -1  180.78   15.00
   6  -4  -1  192.78   11.30
   6  -4  -1  183.88   13.00
   6   4  -1  154.28   17.20
  -6   4   1  200.28    9.90
   6   4  -1  199.18   13.60
  -6   4   1  186.08   14.00
   6   4  -1  191.98   15.90
   6   4  -1  200.58   13.20
   6   4  -1  183.78   16.40
  -5  -4   1   13.80   13.00
  -5  -4   1   20.30   18.70
  -5  -4   1   18.90    3.90
  -5  -4   1   10.10   23.70
  -5   4   1   47.20   18.50
  -5   4   1   10.50   17.40
  -5   4   1   16.80    3.30
  -4  -4   1   50.59    9.90
  -4  -4   1   52.99   15.80
  -4  -4   1   36.10   10.90
  -4  -4   1   26.30   10.20
  -4   4   1   46.70   11.70
  -4   4   1   38.60   13.10
  -3  -4   1  201.68   16.50
   3  -4  -1  247.88   13.90
  -3  -4   1  222.98   14.50
   3  -4  -1  233.48   20.40
  -3  -4   1  194.48   19.30
  -3  -4   1  214.18   14.90
  -3   4   1  195.58   21.80
   3   4  -1  205.78   22.30
  -3   4   1  225.08   16.30
  -3   4   1  212.98   16.90
   3   4  -1  214.68   21.80
   2  -4  -1 3196.08  121.39
  -2  -4   1 3347.06  120.89
  -2  -4   1 3320.77  120.99
  -2  -4   1 3153.48  123.79
   2  -4  -1 3342.17  121.09
  -2  -4   1 3184.88  122.69
  -2   4   1 3399.86  121.89
  -2   4   1 2993.20  123.89
   2   4  -1 3241.08  122.29
  -2   4   1 3312.27  122.09
   2   4  -1 3239.28  122.49
  -1  -4   1 1854.31   64.49
   1  -4  -1 1624.44   66.89
  -1  -4   1 1880.01   66.19
  -1  -4   1 1783.22   64.79
  -1  -4   1 1707.93   67.29
   1  -4  -1 1572.24   64.69
   1   4  -1 1774.52   65.19
  -1   4   1 1529.85   64.49
   1   4  -1 1593.44   66.69
  -1   4   1 1700.73   65.29
  -1   4   1 1678.93   66.49
   1   4  -1 1667.93   65.49
   1   4  -1 1895.41   66.59
   0  -4  -1 1860.51   72.19
   0  -4  -1 2013.20   74.39
   0  -4   1 1903.31   75.39
   0  -4   1 2006.00   73.59
   0  -4  -1 1782.92   72.09
   0  -4   1 2000.90   72.39
   0   4  -1 1983.80   72.39
   0   4   1 1859.71   72.09
   0   4   1 1952.20   70.99
   0   4  -1 1929.71   73.39
   0   4   1 1887.61   74.89
   0   4   1 1996.30   72.59
   0   4  -1 2101.69   74.59
   0   4  -1 1904.41   72.79
  -1  -4  -1 2392.96   86.09
   1  -4   1 2334.67   86.79
   1  -4   1 2278.37   89.89
  -1  -4  -1 2391.26   86.19
  -1  -4  -1 2394.16   89.99
   1  -4   1 2372.06   87.09
   1   4   1 2379.06   86.29
  -1   4  -1 2241.38   88.79
   1   4   1 2192.98   86.69
   1   4   1 2076.79   90.89
  -1   4  -1 2554.04   88.69
  -1   4  -1 2466.75   87.09
   1   4   1 2320.47   86.59
  -1   4  -1 2303.87   86.89
  -2  -4  -1  214.58   17.10
  -2  -4  -1  223.98   12.90
   2  -4   1  202.18   13.40
  -2  -4  -1  245.68   11.30
   2  -4   1  197.68   15.30
  -2   4  -1  229.18   12.90
   2   4   1  217.28   13.60
   2   4   1  226.68   15.60
   2   4   1  232.58   11.40
  -2   4  -1  217.28   12.90
  -2   4  -1  253.57   13.30
  -2   4  -1  181.08   17.00
  -3  -4  -1 2797.72  108.39
  -3  -4  -1 2760.42  108.79
  -3  -4  -1 2674.23  114.99
  -3  -4  -1 3072.29  105.59
  -3   4  -1 3015.40  108.59
  -3   4  -1 2929.31  107.29
   3   4   1 2654.33  107.19
  -3   4  -1 2894.41  112.69
   3   4   1 2724.53  112.19
  -4  -4  -1  216.68   24.10
  -4  -4  -1  235.78   16.10
  -4  -4  -1  211.28   33.70
  -4   4  -1  252.97   22.70
  -4   4  -1  267.47   29.30
  -5  -4  -1   47.40   14.60
  -5  -4  -1   77.69   28.80
   5  -4   1   62.09   11.20
   5  -4   1   52.99   10.40
   5  -4   1   41.00    7.10
  -5   4  -1   39.00    7.60
   5   4   1   44.10    8.90
   5   4   1   40.60    8.80
   5   4   1   27.50    8.60
  -5   4  -1   40.80   21.80
   6  -4   1  150.08   13.10
   6  -4   1  159.08   11.50
  -6  -4  -1  151.78   11.30
   6  -4   1  165.18   12.10
   6  -4   1  171.18   13.80
   6  -4   1  155.08   13.90
   6   4   1  136.49   13.10
  -6   4  -1  147.59    9.60
   6   4   1  160.78   14.20
   6   4   1  156.68   16.80
   6   4   1  169.08   15.70
   7  -4   1  225.58   14.30
  -7  -4  -1  205.68   12.60
   7  -4   1  237.88   15.30
   7  -4   1  246.78   16.10
   7  -4   1  222.08   16.20
   7  -4   1  243.48   13.70
   7   4   1  206.28   16.40
   7   4   1  193.38   15.90
   7   4   1  220.48   16.20
   7   4   1  218.18   14.40
  -7   4  -1  225.58   11.40
   7   4   1  228.38   16.40
  -8  -4  -1   96.79    8.40
   8  -4   1  109.29    9.20
   8  -4   1  112.69   10.20
   8  -4   1  102.59    9.30
   8   4   1  105.09   11.70
  -8   4  -1  110.59    9.30
  -8   4  -1   90.99    7.00
   8   4   1   91.89   11.10
   8   4   1   75.59   13.10
  -9  -4  -1   12.40    3.50
   9  -4   1   13.70    3.70
   9  -4   1   17.70    4.10
  -9  -4  -1   23.40    5.40
  -9   4  -1   17.30    3.30
   9   4   1   16.30    4.60
  -9   4  -1   17.40    3.00
   9   4   1   15.10    4.50
  10   4   1    7.60    3.40
  10   4   1   17.40    5.90
 -10  -5   1   26.50    4.70
  10  -5  -1   37.10    5.90
  10   5  -1   28.90    5.90
 -10   5   1   29.20    3.30
 -10   5   1   33.50    4.40
   9  -5  -1   10.80    6.30
  -9  -5   1   14.90    3.70
  -9  -5   1   12.70    3.90
   9  -5  -1   15.90    4.90
   9  -5  -1   12.60    4.10
   9  -5  -1   13.40    4.60
   9   5  -1   15.80    6.00
   9   5  -1   13.40    6.20
   9   5  -1   14.50    6.20
  -9   5   1   13.10    3.10
   9   5  -1   21.90    5.70
  -9   5   1   12.10    2.70
   8  -5  -1   50.99    7.60
  -8  -5   1   53.79    7.00
   8  -5  -1   50.99    8.20
  -8  -5   1   44.70    8.50
   8  -5  -1   45.70    8.20
   8  -5  -1   50.19    9.40
   8  -5  -1   33.20    6.90
   8   5  -1   52.69   12.70
  -8   5   1   49.60    5.60
   8   5  -1   58.19   11.60
   8   5  -1   51.59   11.30
  -8   5   1   55.09    6.70
   8   5  -1   57.79    9.80
   8   5  -1   67.79    8.10
   7  -5  -1  183.88   13.90
   7  -5  -1  184.38   14.50
  -7  -5   1  173.98   14.00
   7  -5  -1  205.08   13.80
   7  -5  -1  188.38   12.60
   7  -5  -1  196.58   10.90
  -7  -5   1  210.78   11.20
  -7   5   1  204.28   10.20
   7   5  -1  212.88   12.40
   7   5  -1  170.88   13.40
   7   5  -1  180.88   15.10
   7   5  -1  161.58   16.20
  -7   5   1  176.48   11.50
   7   5  -1  192.88   15.80
   7   5  -1  196.48   15.90
  -6  -5   1  226.28   11.50
  -6  -5   1  178.08   18.70
   6  -5  -1  226.28   16.70
   6  -5  -1  215.58   13.70
   6  -5  -1  234.98   12.10
   6  -5  -1  250.57   14.40
   6  -5  -1  220.08   15.80
   6   5  -1  237.48   14.50
   6   5  -1  199.28   18.40
  -6   5   1  211.38   14.00
   6   5  -1  205.78   17.60
  -6   5   1  222.78   10.70
   6   5  -1  211.38   17.80
   6   5  -1  228.68   14.60
  -5  -5   1  130.89   23.10
  -5  -5   1   97.59    7.60
  -5  -5   1   86.59   26.40
  -5  -5   1  105.59   20.40
  -5   5   1  114.69   25.40
  -5   5   1  121.09    7.00
  -5   5   1   84.69   21.80
   4  -5  -1  181.18   14.30
  -4  -5   1  156.58   18.20
  -4  -5   1  151.58   25.90
  -4  -5   1  179.68   16.90
  -4   5   1  154.08    9.30
  -4   5   1  174.58   22.70
  -4   5   1  206.88   32.20
  -3  -5   1  793.52   41.90
  -3  -5   1  822.72   40.00
  -3  -5   1  875.41   37.00
  -3  -5   1  878.91   37.50
   3  -5  -1  920.41   37.50
  -3   5   1  871.11   39.70
  -3   5   1  780.52   38.90
  -3   5   1  875.91   39.40
   2  -5  -1   45.20    9.80
  -2  -5   1   51.19    7.10
  -2  -5   1   50.99   11.30
   2  -5  -1   47.10    8.00
  -2  -5   1   38.10    7.10
  -2  -5   1   52.49    9.70
  -2   5   1   46.70    8.60
   2   5  -1   46.00    9.60
  -2   5   1   54.29    8.80
  -2   5   1   48.30    7.50
  -2   5   1   53.49   11.80
   2   5  -1   53.59    8.50
   1  -5  -1 3681.03  141.99
  -1  -5   1 3903.51  141.49
  -1  -5   1 3850.91  145.29
   1  -5  -1 3811.02  144.99
  -1  -5   1 3816.52  141.69
   1  -5  -1 3599.64  143.19
  -1   5   1 3778.62  141.89
   1   5  -1 3822.12  142.99
  -1   5   1 3944.71  144.49
   1   5  -1 3900.61  141.79
  -1   5   1 3754.72  142.49
   1   5  -1 3948.81  142.49
   1   5  -1 4217.38  144.29
   0  -5  -1 3003.90  113.19
   0  -5  -1 2930.11  113.19
   0  -5   1 3160.88  115.09
   0  -5   1 3012.80  116.99
   0  -5   1 3181.68  113.39
   0  -5  -1 3239.78  115.89
   0   5  -1 2889.31  113.69
   0   5  -1 3287.47  115.79
   0   5  -1 3093.09  113.39
   0   5   1 3089.69  111.89
   0   5   1 2907.31  113.09
   0   5   1 3118.29  113.69
   0   5  -1 2970.70  114.79
   0   5   1 3009.10  116.59
  -1  -5  -1  581.94   23.10
   1  -5   1  551.44   24.40
  -1  -5  -1  552.04   26.10
   1  -5   1  550.24   27.60
  -1  -5  -1  592.84   22.50
  -1  -5  -1  559.74   26.60
   1   5   1  509.05   29.10
  -1   5  -1  535.95   24.00
  -1   5  -1  591.24   25.70
   1   5   1  555.34   24.00
   1   5   1  586.54   23.30
  -1   5  -1  534.75   23.80
   1   5   1  525.45   23.50
  -1   5  -1  529.85   25.80
   2  -5   1 1559.44   62.09
  -2  -5  -1 1636.84   63.99
  -2  -5  -1 1658.63   60.49
   2  -5   1 1552.04   65.29
  -2  -5  -1 1589.94   66.89
  -2  -5  -1 1603.44   61.39
   2   5   1 1648.04   60.49
  -2   5  -1 1598.04   61.79
  -2   5  -1 1650.03   62.39
   2   5   1 1466.95   63.39
  -2   5  -1 1447.66   65.99
   2   5   1 1472.05   61.79
  -2   5  -1 1758.52   63.09
  -3  -5  -1   55.09   14.30
   3  -5   1   71.79   17.00
  -3  -5  -1   76.59   12.80
  -3   5  -1   68.99   10.30
  -3   5  -1   73.89   16.20
   3   5   1   83.59   11.30
  -3   5  -1  105.59   15.40
   3   5   1   65.09   18.00
   3   5   1   76.19   13.30
  -4  -5  -1  144.59   14.90
  -4  -5  -1  134.19   22.70
  -4  -5  -1  148.09   26.90
  -4   5  -1  131.19   22.40
  -4   5  -1  188.48   31.20
  -5  -5  -1   30.60   29.30
  -5  -5  -1   50.59   17.20
   5  -5   1   51.69    9.40
   5  -5   1   41.00    8.20
   5  -5   1   56.69   10.30
   5  -5   1   68.39   11.20
   5   5   1   61.09   10.30
   5   5   1   60.09    9.60
  -5   5  -1   46.10    6.80
  -5   5  -1   53.69   24.90
   5   5   1   59.59   12.10
   5   5   1   36.40    8.70
   6  -5   1  143.79   12.50
   6  -5   1  134.69   11.80
   6  -5   1  138.59   12.60
   6  -5   1  142.09   11.20
   6  -5   1  136.39   13.00
  -6  -5  -1  151.08   10.60
   6   5   1  124.29   13.90
  -6   5  -1  159.58    8.90
   6   5   1  147.69   13.60
   6   5   1  138.69   15.40
   6   5   1  136.49   12.10
   7  -5   1  180.98   13.60
   7  -5   1  178.58   11.90
  -7  -5  -1  167.98   11.20
   7  -5   1  196.68   14.30
   7  -5   1  179.38   12.60
   7  -5   1  189.48   14.60
   7   5   1  181.38   15.10
   7   5   1  171.88   15.00
   7   5   1  151.38   12.70
  -7   5  -1  182.68    9.80
   7   5   1  161.58   15.00
   8  -5   1   80.49    8.10
   8  -5   1   65.89    8.60
   8  -5   1   88.09    9.20
   8  -5   1   85.49    8.50
   8  -5   1   73.69   12.10
  -8  -5  -1   70.19    7.70
   8   5   1   68.69   11.20
   8   5   1   64.39   10.70
   8   5   1   72.49   10.70
  -8   5  -1   71.89    6.20
  -8   5  -1   69.19    7.80
   9  -5   1    1.70    3.10
   9  -5   1    4.10    3.30
  -9  -5  -1    1.00    3.30
   9   5   1    1.90    4.00
  -9   5  -1    0.80    2.70
  -9   5  -1    4.60    2.50
   9   5   1    5.00    4.20
  10   5   1   10.30    4.20
 -10  -6   1   42.40    4.30
  10  -6  -1   39.90    6.50
 -10  -6   1   32.10    4.80
 -10   6   1   33.20    4.30
 -10   6   1   22.30    4.00
  10   6  -1   30.00    4.80
  -9  -6   1  127.99    8.10
   9  -6  -1  128.39    8.60
   9  -6  -1  126.59    9.80
   9  -6  -1  107.99    9.20
  -9  -6   1  128.69    8.40
   9  -6  -1  114.89   11.00
  -9   6   1  117.29    6.90
   9   6  -1  117.89   12.10
   9   6  -1  141.99   12.50
   9   6  -1  128.09   11.10
  -9   6   1  109.69    6.80
   9   6  -1  122.59   11.40
   8  -6  -1   63.19    8.40
   8  -6  -1   67.09    9.80
   8  -6  -1   64.19   10.50
  -8  -6   1   55.59    8.70
   8  -6  -1   81.89   12.30
  -8  -6   1   62.79    7.40
   8  -6  -1   66.99   10.10
   8   6  -1   69.49   11.90
  -8   6   1   75.09    6.70
   8   6  -1   61.29   12.90
   8   6  -1   83.89   12.20
   8   6  -1   76.79    8.60
   8   6  -1   69.89   12.00
   8   6  -1   60.39    9.50
  -8   6   1   66.49    5.80
   7  -6  -1   35.80    7.30
   7  -6  -1   36.60    6.40
   7  -6  -1   41.40   10.10
  -7  -6   1   55.99   10.60
   7  -6  -1   41.50    7.10
  -7  -6   1   32.30    4.90
   7   6  -1   38.80    6.10
   7   6  -1   30.40    6.50
  -7   6   1   35.10    5.30
   7   6  -1   27.30    8.80
   7   6  -1   29.60    8.90
   7   6  -1   56.89   11.30
   7   6  -1   30.30    7.40
  -7   6   1   46.90    7.10
   6  -6  -1  297.87   17.90
   6  -6  -1  312.77   14.80
   6  -6  -1  305.17   16.20
   6  -6  -1  303.47   18.70
  -6  -6   1  293.77   14.20
  -6  -6   1  271.87   19.10
   6  -6  -1  303.47   16.20
   6   6  -1  297.97   20.00
   6   6  -1  299.67   16.60
   6   6  -1  308.67   20.70
   6   6  -1  288.07   16.50
   6   6  -1  286.97   20.50
  -6   6   1  320.27   13.50
  -6   6   1  299.57   15.40
  -5  -6   1   31.30   21.70
  -5  -6   1   29.40   29.70
  -5  -6   1   14.10   14.10
  -5  -6   1   43.60    6.00
  -5   6   1   14.70   25.60
  -5   6   1   33.70   21.60
  -5   6   1   29.90    4.60
  -4  -6   1  192.98   31.90
  -4  -6   1  218.48   30.10
  -4  -6   1  232.38   11.30
  -4  -6   1  248.88   22.30
  -4  -6   1  252.07   19.50
  -4   6   1  249.08   25.70
  -4   6   1  236.38   25.20
  -4   6   1  237.08   10.70
  -3  -6   1  389.06   28.20
   3  -6  -1  403.16   23.70
  -3  -6   1  395.36   27.00
  -3  -6   1  371.16   20.70
  -3  -6   1  415.96   21.60
  -3   6   1  337.27   25.90
   3   6  -1  363.06   30.00
  -3   6   1  372.36   24.00
  -3   6   1  381.76   24.40
  -2  -6   1   61.09    8.10
   2  -6  -1   64.49   11.40
  -2  -6   1   63.79    8.10
   2  -6  -1   57.49    9.50
  -2  -6   1   58.49   11.10
  -2  -6   1   60.69   11.20
   2   6  -1   65.49   10.80
  -2   6   1   67.29   10.60
   2   6  -1   53.89    8.10
   2   6  -1   59.49   11.60
  -2   6   1   64.99   11.70
  -2   6   1   70.79   14.60
   2   6  -1   66.59   10.40
  -1  -6   1 4781.62  176.98
   1  -6  -1 4623.14  178.98
  -1  -6   1 4786.52  179.68
   1  -6  -1 4818.12  177.58
   1  -6  -1 4597.14  175.38
  -1  -6   1 4801.42  175.08
   1   6  -1 5059.29  177.98
   1   6  -1 4600.54  179.18
   1   6  -1 4764.92  175.08
  -1   6   1 4871.31  178.58
  -1   6   1 4741.53  175.48
   1   6  -1 4750.02  175.88
   1   6  -1 4609.84  176.58
  -1   6   1 4847.71  176.28
   0  -6  -1 2064.99   78.39
   0  -6   1 2006.50   80.29
   0  -6  -1 1910.51   75.29
   0  -6  -1 1985.10   78.19
   0  -6  -1 1944.71   75.59
   0  -6   1 2045.60   75.49
   0  -6   1 1869.01   76.09
   0  -6   1 2067.09   77.79
   0   6  -1 2091.19   78.09
   0   6   1 2081.89   80.19
   0   6   1 1888.41   75.39
   0   6  -1 1880.51   81.69
   0   6  -1 1987.60   77.89
   0   6  -1 1955.60   75.69
   0   6   1 2020.60   73.99
   0   6   1 2012.10   75.79
   0   6  -1 2000.20   75.49
  -1  -6  -1  832.12   30.60
   1  -6   1  793.92   32.40
  -1  -6  -1  788.82   31.50
  -1  -6  -1  790.12   35.50
  -1  -6  -1  761.92   35.30
   1  -6   1  769.92   37.40
   1  -6   1  753.12   33.20
  -1   6  -1  775.32   32.50
  -1   6  -1  759.42   34.70
   1   6   1  715.43   39.20
   1   6   1  744.83   31.90
  -1   6  -1  812.92   34.40
   1   6   1  716.03   32.70
  -1   6  -1  740.23   32.80
   1   6   1  800.32   31.90
  -2  -6  -1  611.94   32.70
  -2  -6  -1  610.84   26.90
   2  -6   1  615.94   33.80
   2  -6   1  637.84   30.00
  -2  -6  -1  644.94   26.60
  -2  -6  -1  592.64   31.30
  -2   6  -1  646.74   29.20
  -2   6  -1  689.53   29.70
   2   6   1  604.14   26.70
   2   6   1  581.74   30.30
   2   6   1  572.04   30.20
  -2   6  -1  654.43   29.00
  -2   6  -1  569.64   33.40
  -3  -6  -1 2436.86  103.79
  -3  -6  -1 2456.95   95.99
  -3  -6  -1 2618.94   93.89
   3  -6   1 2233.08   99.59
  -3  -6  -1 2531.65   99.09
   3   6   1 2296.17  101.99
  -3   6  -1 2486.85   97.39
   3   6   1 2632.34   94.19
  -3   6  -1 2575.24   97.49
  -3   6  -1 2501.15  101.89
  -4  -6  -1   78.79   23.90
  -4  -6  -1   57.19   11.40
  -4  -6  -1   73.79   17.20
  -4   6  -1   74.49   16.90
  -4   6  -1   96.49   25.00
  -4   6  -1   69.19    6.80
   5  -6   1  448.26   22.00
   5  -6   1  475.15   21.30
  -5  -6  -1  389.96   68.19
   5  -6   1  431.96   20.40
  -5  -6  -1  390.46   21.30
   5  -6   1  421.96   21.10
  -5   6  -1  376.16   49.30
  -5   6  -1  440.86   18.20
   5   6   1  431.86   24.90
   5   6   1  487.45   23.60
   5   6   1  451.15   20.30
   5   6   1  396.66   23.70
  -6  -6  -1  608.74   25.30
   6  -6   1  623.24   27.80
   6   6   1  621.34   26.70
  -6   6  -1  643.04   24.50
   6   6   1  529.05   30.50
   7  -6   1   90.69   10.60
   7  -6   1   91.59    9.80
   7  -6   1   90.99   17.50
  -7  -6  -1   83.39    9.00
   7  -6   1   81.39    9.00
   7  -6   1  104.29   11.90
   7   6   1  101.69   12.30
   7   6   1   73.59   13.50
   7   6   1   76.59   12.20
  -7   6  -1   83.19    7.00
  -7   6  -1   64.19   10.10
   7   6   1   80.79   10.20
  -8  -6  -1  164.28   10.30
   8  -6   1  163.68   13.50
   8  -6   1  146.69   13.10
   8  -6   1  186.58   13.00
  -8   6  -1  162.88    8.70
   8   6   1  140.29   11.90
   8   6   1  158.08   13.30
   8   6   1  168.88   14.40
  -8   6  -1  159.58    9.40
   9  -6   1   22.00    4.90
   9  -6   1   16.30    3.70
  -9  -6  -1   16.40    4.90
  -9  -6  -1   15.10    3.70
  -9   6  -1   24.30    4.20
   9   6   1   24.50    5.10
   9   6   1   12.60    4.50
  -9   6  -1   27.30    5.50
 -10  -7   1   80.49    6.00
 -10  -7   1   88.49    5.50
  10   7  -1   82.89   10.20
  10   7  -1   87.59    9.60
 -10   7   1   81.29    5.30
   9  -7  -1  137.59    8.90
   9  -7  -1  125.49   10.60
  -9  -7   1  138.89    8.40
   9  -7  -1  128.69    9.50
   9  -7  -1  150.08   12.30
   9  -7  -1  150.58   10.30
  -9  -7   1  129.79    8.40
   9   7  -1  130.69   11.50
  -9   7   1  149.39    7.40
   9   7  -1  116.99   18.80
  -9   7   1  129.69    7.20
   9   7  -1  155.88   13.30
   9   7  -1  140.29   11.60
   8  -7  -1   13.20    6.30
  -8  -7   1   18.50    4.20
   8  -7  -1   27.80    6.20
   8  -7  -1   30.40    6.00
  -8  -7   1   16.20    5.20
   8  -7  -1   16.50    5.50
   8   7  -1   17.30    5.20
   8   7  -1   17.60    5.40
  -8   7   1   28.60    5.30
   8   7  -1   29.10    7.70
   8   7  -1   23.70    7.60
   8   7  -1   21.10    6.90
  -8   7   1   19.10    3.20
   8   7  -1   13.10    6.80
   7  -7  -1   47.30    7.80
   7  -7  -1   39.50    6.70
   7  -7  -1   47.30    9.40
  -7  -7   1   58.39   10.30
  -7  -7   1   49.00    7.20
   7  -7  -1   48.60    8.50
   7  -7  -1   51.89   10.40
   7   7  -1   28.00    9.30
  -7   7   1   51.49    5.50
   7   7  -1   37.30    8.20
   7   7  -1   39.60    9.60
   7   7  -1   43.60    6.50
  -7   7   1   40.40    6.80
   7   7  -1   54.39   10.00
   7   7  -1   42.00    8.50
  -6  -7   1  107.09    8.30
   6  -7  -1  120.99   12.70
   6  -7  -1   99.89   13.50
  -6  -7   1   77.69   14.20
   6  -7  -1  108.09   10.60
   6  -7  -1  108.89   10.60
   6  -7  -1  107.19    8.70
  -6   7   1  126.49    9.40
   6   7  -1   82.29   11.30
   6   7  -1  117.09   15.20
   6   7  -1  108.99   17.70
  -6   7   1  112.59    7.00
   6   7  -1  118.29   10.80
   6   7  -1   98.49   14.90
   5  -7  -1  702.33   28.80
  -5  -7   1  732.43   28.30
  -5  -7   1  641.24   58.79
  -5  -7   1  723.73   41.70
   5  -7  -1  650.63   29.90
  -5  -7   1  795.42  101.89
   5  -7  -1  729.23   29.90
   5   7  -1  730.53   33.30
   5   7  -1  599.34   37.40
  -5   7   1  729.63   27.60
  -5   7   1  679.33   56.19
  -5   7   1  784.12   54.89
   5   7  -1  737.93   34.20
   5   7  -1  769.92   30.30
  -4  -7   1  148.59   17.60
  -4  -7   1  128.89   28.40
  -4  -7   1  139.09    8.20
  -4  -7   1  131.29   20.10
  -4   7   1  145.19   20.40
   4   7  -1  113.69   20.40
  -4   7   1  133.99    7.30
  -4   7   1  106.69   18.90
  -3  -7   1  587.74   35.00
  -3  -7   1  564.64   38.60
  -3  -7   1  602.34   29.40
   3  -7  -1  618.34   34.40
  -3  -7   1  609.84   29.00
  -3   7   1  686.23   33.80
  -3   7   1  590.34   33.20
  -3   7   1  501.85   34.50
   3   7  -1  645.34   29.50
  -2  -7   1  191.98   12.60
   2  -7  -1  188.38   17.80
   2  -7  -1  173.08   17.80
  -2  -7   1  181.48   16.20
  -2  -7   1  167.68   21.00
  -2  -7   1  170.78   12.70
   2   7  -1  194.18   13.20
  -2   7   1  172.58   15.10
   2   7  -1  150.58   19.20
  -2   7   1  188.08   17.30
  -2   7   1  171.08   19.40
   2   7  -1  215.88   16.00
  -1  -7   1  534.85   24.00
   1  -7  -1  496.05   25.30
  -1  -7   1  536.95   30.90
   1  -7  -1  519.05   28.30
   1  -7  -1  549.95   28.00
  -1   7   1  529.35   28.40
   1   7  -1  572.44   30.90
   1   7  -1  519.95   25.90
   1   7  -1  566.94   27.20
   1   7  -1  530.65   24.00
  -1   7   1  522.25   25.30
  -1   7   1  489.95   25.20
   1   7  -1  488.55   27.10
   0  -7   1 1054.89   41.10
   0  -7   1  918.61   43.90
   0  -7  -1  880.21   40.90
   0  -7  -1  980.90   41.10
   0  -7  -1  890.31   38.00
   0  -7  -1  910.21   37.40
   0  -7   1  874.51   37.20
   0   7   1  849.32   37.90
   0   7   1  904.71   43.10
   0   7   1  922.31   36.10
   0   7  -1  832.12   38.80
   0   7   1  921.31   38.00
   0   7  -1  946.01   40.40
   0   7  -1  881.71   37.40
   0   7  -1  904.51   41.00
   0   7  -1  854.31   37.60
  -1  -7  -1  284.27   21.50
  -1  -7  -1  305.67   19.60
   1  -7   1  350.16   24.90
  -1  -7  -1  337.47   18.40
   1  -7   1  287.67   19.60
   1  -7   1  310.07   17.10
  -1   7  -1  335.87   19.50
   1   7   1  275.37   26.20
  -1   7  -1  293.87   20.20
   1   7   1  299.77   19.50
  -1   7  -1  314.37   19.00
  -1   7  -1  328.47   17.60
   1   7   1  317.87   16.60
   2  -7   1  558.34   35.40
  -2  -7  -1  599.64   26.00
  -2  -7  -1  581.14   26.40
  -2  -7  -1  597.44   32.70
  -2  -7  -1  551.54   32.50
  -2   7  -1  598.64   29.20
  -2   7  -1  557.74   29.60
   2   7   1  560.34   30.90
  -2   7  -1  551.94   33.80
   2   7   1  563.14   26.30
  -2   7  -1  608.44   28.70
  -3  -7  -1  217.48   15.30
  -3  -7  -1  194.78   17.40
  -3  -7  -1  171.88   27.60
  -3  -7  -1  185.98   25.30
   3  -7   1  212.78   30.10
  -3   7  -1  179.88   26.30
  -3   7  -1  170.68   26.70
   3   7   1  171.08   26.50
   3   7   1  181.88   17.00
  -3   7  -1  177.48   20.20
  -4  -7  -1  527.65   48.80
  -4  -7  -1  590.14   29.70
  -4  -7  -1  501.65   36.00
  -4   7  -1  563.04   48.10
  -4   7  -1  525.65   38.40
  -4   7  -1  528.15   21.50
   5  -7   1   66.79   10.10
   5  -7   1   57.49   10.10
   5  -7   1   73.39   10.40
   5  -7   1   55.79    8.90
  -5  -7  -1   46.20    8.10
   5   7   1   65.59    8.60
   5   7   1   45.20    9.30
   5   7   1   88.89   17.00
  -5   7  -1   50.19    6.80
  -5   7  -1   25.30   33.20
   6  -7   1  360.36   18.50
  -6  -7  -1  348.77   16.70
   6  -7   1  362.66   17.70
   6  -7   1  342.07   18.10
   6  -7   1  369.86   19.00
   6   7   1  395.96   27.00
   6   7   1  332.27   21.80
   6   7   1  349.77   18.00
  -6   7  -1  373.86   15.60
   6   7   1  329.87   20.30
   7  -7   1   80.29   10.60
   7  -7   1   85.09    8.80
   7  -7   1   82.29   10.00
   7  -7   1   74.09    9.20
   7  -7   1   81.59   10.80
   7   7   1   54.29    9.40
   7   7   1   67.49   12.00
  -7   7  -1   77.79    8.60
   7   7   1   64.89   13.60
   7   7   1   66.29   12.00
   8  -7   1  108.79    8.90
  -8  -7  -1   86.89   10.70
  -8  -7  -1  106.89    8.70
   8  -7   1  105.09   11.20
   8  -7   1  113.59   11.60
   8   7   1  106.59   12.30
  -8   7  -1  109.59    6.80
   8   7   1   94.39   10.20
  -8   7  -1  108.79    7.30
   8   7   1  108.29   12.60
   8   7   1   79.19   15.30
   9  -7   1   29.90    5.50
   9  -7   1   25.30    4.90
  -9  -7  -1   28.00    4.10
  -9  -7  -1   30.30    4.70
   9   7   1   27.50    5.20
   9   7   1   34.60    7.30
  -9   7  -1   31.10    4.30
 -10  -8   1  110.79    6.00
  10   8  -1  102.79    7.50
   9  -8  -1   41.60    7.50
   9  -8  -1   50.39    9.80
  -9  -8   1   33.70    5.80
   9  -8  -1   59.69    8.40
  -9  -8   1   41.10    5.70
   9  -8  -1   50.99    5.90
   9  -8  -1   49.00    7.50
   9   8  -1   43.40    8.90
   9   8  -1   48.20    9.30
  -9   8   1   40.20    4.20
   9   8  -1   48.80   10.90
  -9   8   1   40.40    4.20
   8  -8  -1  120.69   10.70
   8  -8  -1  111.69   10.40
  -8  -8   1  107.19    9.60
  -8  -8   1  111.69    8.70
   8  -8  -1  112.49    9.20
   8  -8  -1  128.49   10.20
   8   8  -1  134.29   14.50
   8   8  -1  108.99   12.80
   8   8  -1  116.39   10.10
   8   8  -1  132.39   16.30
   8   8  -1  103.79   12.90
  -8   8   1  124.79    7.60
  -8   8   1  117.19    7.10
  -7  -8   1   63.09    7.80
   7  -8  -1   74.29   11.20
   7  -8  -1   71.09   10.30
   7  -8  -1   55.59    9.60
   7  -8  -1   74.49    8.80
  -7  -8   1   67.89    8.20
   7   8  -1   75.89    9.60
   7   8  -1   54.59   10.20
   7   8  -1   78.49   10.20
  -7   8   1   79.19    5.90
   7   8  -1   70.99   10.80
   7   8  -1   87.09   13.60
  -7   8   1   68.79    6.90
   6  -8  -1   62.19    9.10
   6  -8  -1   60.99   12.90
   6  -8  -1   51.99    7.10
  -6  -8   1   51.79    8.60
   6  -8  -1   70.29   11.20
   6  -8  -1   40.50    6.50
  -6  -8   1   54.69    7.00
   6   8  -1   53.89    7.40
  -6   8   1   45.00    7.40
   6   8  -1   33.10    8.60
   6   8  -1   50.99    9.10
   6   8  -1   36.60   10.10
   6   8  -1   60.99   11.10
  -6   8   1   43.40    5.10
   5  -8  -1  609.54   26.40
  -5  -8   1  574.14   24.50
   5  -8  -1  617.44   28.30
  -5  -8   1  607.24   41.70
   5  -8  -1  612.14   25.90
   5  -8  -1  614.94   25.10
   5   8  -1  556.44   30.40
   5   8  -1  621.04   26.40
  -5   8   1  588.64   24.90
  -5   8   1  563.64   55.79
   5   8  -1  616.24   30.10
   5   8  -1  604.84   27.10
  -4  -8   1   63.39   12.50
  -4  -8   1   51.29    6.00
  -4  -8   1   64.39   15.20
  -4  -8   1   41.10   18.50
   4   8  -1   49.20   14.20
  -4   8   1   76.79   18.60
  -4   8   1   66.09   20.90
  -4   8   1   52.89    4.60
  -3  -8   1  943.91   48.70
  -3  -8   1 1020.60   44.60
   3  -8  -1 1081.29   52.59
  -3  -8   1 1036.90   51.49
  -3  -8   1  909.31   56.29
   3   8  -1 1100.19   47.00
  -3   8   1 1051.49   49.20
  -3   8   1 1029.10   49.10
  -2  -8   1  406.06   21.10
  -2  -8   1  424.96   20.90
  -2  -8   1  354.46   32.10
   2  -8  -1  385.76   27.30
  -2  -8   1  415.46   25.30
   2   8  -1  434.26   25.20
   2   8  -1  424.36   28.80
   2   8  -1  420.66   21.80
  -2   8   1  360.56   26.10
   2   8  -1  315.27   35.40
  -2   8   1  413.76   24.50
   1  -8  -1  204.78   18.80
  -1  -8   1  230.68   16.60
   1  -8  -1  228.38   20.60
   1  -8  -1  208.98   17.80
  -1  -8   1  222.78   14.10
  -1  -8   1  241.68   24.80
  -1   8   1  213.38   15.90
   1   8  -1  226.28   21.40
   1   8  -1  198.78   14.20
   1   8  -1  201.28   17.90
   1   8  -1  240.68   24.50
  -1   8   1  187.48   20.70
  -1   8   1  195.18   18.00
   1   8  -1  225.38   17.50
   0  -8   1 1903.01   81.29
   0  -8  -1 1912.31   74.59
   0  -8   1 1991.90   73.89
   0  -8  -1 1931.31   77.49
   0  -8   1 2016.10   77.49
   0  -8  -1 1785.82   73.49
   0  -8  -1 1848.22   77.99
   0   8   1 1925.01   81.09
   0   8   1 1886.41   74.29
   0   8   1 1837.12   73.49
   0   8  -1 2063.09   77.59
   0   8  -1 1757.92   75.29
   0   8  -1 1898.01   74.29
   0   8   1 1714.93   74.39
   0   8  -1 1960.40   78.69
   1  -8   1 1807.82   71.99
   1  -8   1 1624.54   75.79
  -1  -8  -1 1858.51   71.09
  -1  -8  -1 1792.72   76.69
   1  -8   1 1811.72   79.69
  -1  -8  -1 1898.11   75.79
  -1   8  -1 1834.12   75.99
  -1   8  -1 1799.12   73.39
   1   8   1 1769.52   71.59
  -1   8  -1 1934.71   75.09
  -1   8  -1 1864.31   72.39
   1   8   1 1958.30   71.79
  -2  -8  -1  653.43   36.50
  -2  -8  -1  634.44   28.60
  -2  -8  -1  638.54   39.00
   2  -8   1  649.34   42.60
  -2  -8  -1  667.33   29.50
  -2   8  -1  646.14   40.50
   2   8   1  652.93   30.30
  -2   8  -1  653.43   35.10
   2   8   1  631.94   36.10
  -2   8  -1  653.63   32.70
  -2   8  -1  639.04   32.90
  -3  -8  -1   19.80   13.70
  -3  -8  -1   13.00   21.90
  -3  -8  -1   27.60    9.80
   3  -8   1   -6.00   23.70
   3   8   1    6.00   10.90
  -3   8  -1    4.40   11.80
  -3   8  -1   16.20    3.00
  -4  -8  -1  358.96   49.50
  -4  -8  -1  371.56   16.60
  -4  -8  -1  443.66   28.00
  -4  -8  -1  346.67   33.70
  -4   8  -1  408.46   38.80
  -4   8  -1  279.37   48.40
  -4   8  -1  384.96   15.80
   5  -8   1  173.28   12.60
   5  -8   1  160.88   12.10
   5  -8   1  172.68   12.70
   5  -8   1  148.69   11.50
   5   8   1  166.58   14.60
   5   8   1  169.38   11.30
  -5   8  -1  156.18    8.70
   5   8   1  206.18   19.60
   6  -8   1  282.37   16.50
   6  -8   1  294.17   15.80
  -6  -8  -1  272.07   14.20
   6  -8   1  287.67   15.10
   6  -8   1  297.07   15.90
   6   8   1  298.57   20.70
   6   8   1  264.07   18.30
  -6   8  -1  299.97   19.40
   6   8   1  248.38   19.00
   6   8   1  275.57   15.40
  -6   8  -1  299.37   13.00
  -7  -8  -1  391.56   18.70
   7  -8   1  421.16   19.40
   7  -8   1  424.06   19.90
   7  -8   1  448.56   20.80
   7  -8   1  430.26   21.00
   7  -8   1  452.15   20.30
  -7   8  -1  426.76   18.30
   7   8   1  399.26   23.20
   7   8   1  379.96   19.60
  -7   8  -1  430.96   17.50
   7   8   1  368.56   22.80
   7   8   1  386.66   22.20
   8  -8   1  177.18   12.40
  -8  -8  -1  182.08   12.30
   8  -8   1  201.88   11.00
  -8  -8  -1  181.08   10.80
   8  -8   1  187.48   11.50
   8  -8   1  192.38   12.80
   8   8   1  196.28   14.20
  -8   8  -1  177.38    9.30
   8   8   1  168.48   13.80
  -8   8  -1  180.08    9.00
   8   8   1  186.38   14.00
   8   8   1  184.68   11.60
   9  -8   1   23.40    4.80
  -9  -8  -1   22.40    3.90
  -9  -8  -1   20.00    4.60
   9  -8   1   23.00    3.80
   9   8   1   27.00    5.20
  -9   8  -1   25.30    4.30
   9   8   1   26.60    5.20
 -10  -9   1  114.49    6.10
  10   9  -1  111.49    7.50
   9  -9  -1   31.00    5.30
   9  -9  -1   40.20    6.00
   9  -9  -1   35.60    7.50
  -9  -9   1   30.80    5.50
  -9  -9   1   39.20    5.70
   9  -9  -1   36.10    5.80
   9   9  -1   31.00    6.00
  -9   9   1   42.80    3.90
   9   9  -1   28.90    6.20
  -9   9   1   36.60    4.00
   9   9  -1   47.00   10.50
  -8  -9   1  332.67   16.00
   8  -9  -1  380.16   18.70
   8  -9  -1  335.37   16.40
  -8  -9   1  342.37   16.70
   8  -9  -1  338.87   17.00
   8   9  -1  321.17   19.70
   8   9  -1  346.47   17.00
   8   9  -1  374.76   20.00
  -8   9   1  336.47   14.70
  -8   9   1  353.96   14.90
   8   9  -1  345.07   21.20
  -7  -9   1   40.60    7.10
   7  -9  -1   43.20    7.50
   7  -9  -1   45.80    8.40
   7  -9  -1   40.10    8.20
  -7  -9   1   36.50    6.50
   7  -9  -1   38.00    9.20
   7   9  -1   37.40   10.20
   7   9  -1   31.90    6.30
   7   9  -1   46.70    9.10
  -7   9   1   43.00    6.00
  -7   9   1   48.50    5.10
   7   9  -1   28.90   10.80
   7   9  -1   32.80    7.90
   6  -9  -1  131.79   14.20
   6  -9  -1  133.89   17.00
  -6  -9   1  157.88    9.60
   6  -9  -1  138.39   12.30
   6  -9  -1  136.49   12.90
   6  -9  -1  140.89   14.90
  -6  -9   1  126.79   12.90
  -6   9   1  139.89    8.90
   6   9  -1  128.29   16.50
  -6   9   1  150.28    7.90
   6   9  -1  152.68   15.40
   6   9  -1  141.29   21.20
   6   9  -1  146.39   19.70
   6   9  -1  152.28   12.50
  -5  -9   1   15.90    3.80
   5  -9  -1   20.70    8.70
   5  -9  -1   10.80    6.00
   5  -9  -1   27.20    5.60
   5  -9  -1   12.00    7.10
  -5  -9   1   26.20    8.40
   5  -9  -1   20.00    4.70
  -5   9   1   14.80    2.50
   5   9  -1   16.70    6.00
  -5   9   1   26.60    4.70
   5   9  -1   10.50    8.60
   5   9  -1   -1.60    6.60
  -4  -9   1   12.30   12.30
  -4  -9   1   28.50   21.00
  -4  -9   1   11.40   15.10
  -4  -9   1   11.60    3.30
   4   9  -1   18.00   16.90
  -4   9   1   -3.30   22.70
  -4   9   1   10.00    2.40
  -4   9   1   10.20   20.10
  -3  -9   1  886.01   42.70
  -3  -9   1  941.81   50.59
  -3  -9   1  957.90   42.90
   3  -9  -1  979.60   55.49
   3   9  -1  917.61   43.70
  -3   9   1  948.01   35.30
  -3   9   1  976.10   50.09
  -3   9   1  955.00   48.70
  -2  -9   1  663.13   35.60
   2  -9  -1  671.73   40.10
  -2  -9   1  637.54   30.90
  -2   9   1  650.03   34.70
   2   9  -1  641.94   31.30
  -1  -9   1   83.89   20.20
  -1  -9   1   84.99   11.00
  -1  -9   1   65.19   13.30
   1  -9  -1   65.29   15.60
   1  -9  -1   70.59   14.80
  -1   9   1   82.29   13.40
   1   9  -1   73.79   14.00
   1   9  -1   68.69   17.80
   1   9  -1   75.09   11.60
   1   9  -1   80.09   14.50
   0  -9  -1 2064.79   80.09
   0  -9   1 1930.91   79.09
   0  -9   1 1901.51   74.89
   0  -9  -1 1884.11   74.99
   0  -9  -1 1853.71   76.39
   0  -9   1 1813.52   84.09
   0   9   1 1962.90   75.89
   0   9   1 1936.81   73.79
   0   9  -1 1737.93   77.79
   0   9  -1 1957.50   78.89
   0   9  -1 1872.91   75.79
   0   9  -1 1942.31   81.69
   0   9  -1 1881.81   74.99
   1  -9   1  162.58   29.70
  -1  -9  -1  150.08   17.70
   1  -9   1  138.79   14.60
   1  -9   1  131.89   19.60
  -1  -9  -1  151.68   13.00
   1   9   1  153.68   18.10
  -1   9  -1  167.58   15.30
  -1   9  -1  148.99   17.20
  -1   9  -1  130.99   22.80
   1   9   1  145.59   14.50
  -1   9  -1  174.68   22.50
   2  -9   1  454.25   44.00
  -2  -9  -1  528.95   25.70
  -2  -9  -1  490.55   24.30
  -2   9  -1  510.75   29.30
  -2   9  -1  448.36   35.70
   2   9   1  531.75   27.20
   2   9   1  477.05   35.70
  -3  -9  -1  185.38   32.00
  -3  -9  -1  188.78    9.60
  -3  -9  -1  194.48   20.40
  -3  -9  -1  144.29   18.30
  -3   9  -1  194.68    8.80
  -3   9  -1  155.28   25.60
   4  -9   1   58.99   10.30
  -4  -9  -1   58.29   20.10
  -4  -9  -1   50.09    6.90
  -4  -9  -1   51.59   16.40
   4  -9   1   70.69   10.00
   4  -9   1   59.09    9.20
   4   9   1   53.39    8.30
  -4   9  -1    8.80   24.40
  -4   9  -1   52.59    5.00
   5  -9   1  130.09   11.50
   5  -9   1  119.79   10.30
   5  -9   1  114.59   10.70
   5  -9   1  111.79   10.90
   5  -9   1  119.19   16.60
   5   9   1  153.18   14.00
  -5   9  -1  125.09   11.10
   5   9   1  125.09   14.90
   5   9   1  109.49   15.00
   5   9   1  149.49   19.70
  -5   9  -1  130.39    7.30
   5   9   1  122.79   10.00
   6  -9   1  454.65   21.40
   6  -9   1  487.45   22.50
   6  -9   1  456.05   21.00
   6  -9   1  473.05   21.80
  -6  -9  -1  446.96   20.10
   6   9   1  433.76   24.10
   6   9   1  423.36   25.60
   6   9   1  475.45   26.00
   6   9   1  460.95   21.50
  -6   9  -1  490.55   19.10
  -6   9  -1  448.96   20.10
   7  -9   1  573.34   24.60
   7  -9   1  560.24   25.80
  -7  -9  -1  557.64   23.90
   7  -9   1  629.54   25.90
   7  -9   1  576.34   25.00
   7   9   1  543.55   28.10
   7   9   1  502.95   28.40
   7   9   1  541.15   24.60
   7   9   1  553.74   27.30
  -7   9  -1  579.94   22.60
  -7   9  -1  560.84   23.00
   8  -9   1    0.60    3.70
  -8  -9  -1    0.40    3.70
   8  -9   1    9.70    5.00
   8  -9   1    7.00    5.30
   8  -9   1   10.70    4.20
  -8  -9  -1    1.20    5.40
   8   9   1    3.20    5.00
   8   9   1    3.70    6.00
  -8   9  -1    5.20    2.80
   8   9   1    6.40    6.30
  -8   9  -1    6.20    2.50
   8   9   1    0.00    4.50
   9  -9   1    0.10    3.00
   9  -9   1    3.70    3.50
  -9  -9  -1    2.40    4.00
  -9  -9  -1    1.40    3.50
   9   9   1    5.90    5.90
  -9   9  -1    0.80    2.30
   9   9   1    1.00    4.20
 -10 -10   1   32.80    3.80
  10  10  -1   23.40    4.30
  -9 -10   1   21.00    6.40
   9 -10  -1   18.40    5.40
  -9 -10   1   20.70    3.80
   9 -10  -1   31.00    5.10
  -9  10   1   27.30    4.80
   9  10  -1   19.70    5.60
   9  10  -1   26.00    5.60
   9  10  -1   24.60    6.30
   8 -10  -1   25.70    5.90
   8 -10  -1   13.30    5.10
   8 -10  -1   15.60    6.00
  -8 -10   1   21.50    7.40
  -8 -10   1    8.40    3.80
   8 -10  -1   17.30    4.40
   8 -10  -1   17.60    6.90
   8  10  -1   22.50   12.20
  -8  10   1   15.80    3.20
   8  10  -1    8.70    6.30
   8  10  -1   22.80    7.30
   8  10  -1   20.50    6.10
  -8  10   1   12.30    2.70
   7 -10  -1  139.49   10.40
  -7 -10   1  116.09    9.10
   7 -10  -1  116.69   12.50
   7 -10  -1  125.69   10.20
   7 -10  -1  124.69   11.40
  -7 -10   1  130.59   10.80
  -7  10   1  122.59    7.80
   7  10  -1  111.49   10.50
  -7  10   1  121.29    7.20
   7  10  -1  101.89   16.60
   7  10  -1  112.39   12.10
   6 -10  -1  322.07   16.70
   6 -10  -1  294.27   18.50
  -6 -10   1  337.27   15.40
   6 -10  -1  298.77   23.60
   6 -10  -1  319.77   16.50
   6  10  -1  322.37   22.00
  -6  10   1  317.77   13.90
   6  10  -1  312.47   18.20
  -6  10   1  319.17   14.50
   6  10  -1  344.47   17.00
   6  10  -1  300.87   21.40
  -5 -10   1  715.83   32.00
   5 -10  -1  769.82   32.60
   5 -10  -1  738.93   31.00
   5 -10  -1  731.43   31.30
   5 -10  -1  754.32   30.40
  -5 -10   1  785.72   30.10
   5 -10  -1  788.62   33.20
   5  10  -1  739.03   32.30
   5  10  -1  795.82   31.70
   5  10  -1  752.62   35.30
  -5  10   1  782.82   29.10
   5  10  -1  641.34   34.10
  -5  10   1  779.72   29.70
  -4 -10   1   40.30    5.50
  -4 -10   1   45.40   15.90
   4 -10  -1   39.20    9.90
  -4 -10   1   29.60   28.40
  -4 -10   1   58.19   19.70
  -4  10   1   45.20   24.50
  -4  10   1   27.60   28.30
  -4  10   1   45.70    4.20
  -3 -10   1   48.20   11.30
  -3 -10   1   75.59   19.10
  -3 -10   1   65.99   12.80
  -3  10   1   66.69    4.60
   3  10  -1  116.09   20.40
  -3  10   1   72.29   17.30
  -3  10   1   46.40   17.90
  -2 -10   1  313.37   13.60
  -2 -10   1  297.27   25.60
  -2 -10   1  327.67   21.30
   2  10  -1  341.07   22.40
  -2  10   1  335.77   26.20
  -2  10   1  300.47   12.90
   1 -10  -1  638.94   53.69
  -1 -10   1  742.23   37.40
  -1 -10   1  711.63   33.40
  -1  10   1  672.83   35.70
  -1  10   1  683.93   33.10
   1  10  -1  734.73   38.50
   1  10  -1  725.13   33.90
   0 -10  -1  392.16   22.80
   0 -10  -1  355.56   28.90
   0 -10  -1  431.66   27.80
   0 -10   1  349.07   21.90
   0 -10   1  361.76   26.60
   0  10  -1  395.46   26.70
   0  10  -1  356.26   22.30
   0  10   1  343.07   23.20
   0  10  -1  398.46   38.70
   0  10   1  415.36   23.60
  -1 -10  -1  369.16   22.00
   1 -10   1  372.16   30.20
  -1 -10  -1  387.66   28.10
   1 -10   1  385.26   23.90
   1  10   1  394.46   28.20
   1  10   1  401.76   23.90
  -1  10  -1  370.16   24.20
  -1  10  -1  379.36   26.70
  -2 -10  -1  165.78   16.80
  -2 -10  -1  170.18    8.40
  -2 -10  -1  151.78   24.30
  -2  10  -1  173.88   22.30
  -2  10  -1  159.28    7.80
   2  10   1  149.29   20.20
   2  10   1  177.68   25.80
  -3 -10  -1  824.62   54.59
  -3 -10  -1  788.12   40.10
  -3 -10  -1  797.52   30.60
  -3 -10  -1  838.32   39.90
  -3  10  -1  760.32   48.00
  -3  10  -1  787.12   30.30
   4 -10   1  290.37   15.80
  -4 -10  -1  396.46   34.60
   4 -10   1  317.27   16.80
   4 -10   1  301.17   16.30
   4 -10   1  295.17   16.90
  -4 -10  -1  315.27   13.80
   4 -10   1  309.87   19.00
  -4  10  -1  312.77   14.60
   4  10   1  281.07   17.90
  -4  10  -1  200.18   35.30
   4  10   1  302.57   15.60
   4  10   1  271.87   24.90
   4  10   1  316.47   17.60
   5 -10   1  149.69   11.00
   5 -10   1  139.49   11.20
   5 -10   1  141.39   11.50
   5 -10   1  118.69   15.20
   5 -10   1  131.59   10.40
   5  10   1  129.69   15.40
  -5  10  -1  138.79   10.20
   5  10   1  146.09   10.30
   5  10   1  111.69   14.10
  -5  10  -1  148.09    7.80
   5  10   1  142.99   18.00
   5  10   1  106.19   14.10
  -6 -10  -1    5.70    4.10
   6 -10   1   -5.90    9.80
   6 -10   1    8.50    4.50
   6 -10   1    8.60    4.60
   6 -10   1    9.60    5.20
   6 -10   1    9.00    5.40
   6  10   1    4.70    7.70
  -6  10  -1    9.50    2.90
  -6  10  -1   -0.80    4.00
   6  10   1    8.10    7.40
   6  10   1    4.50    4.70
   6  10   1   14.80    8.30
   7 -10   1  347.47   16.60
   7 -10   1  308.57   15.60
   7 -10   1  283.47   15.60
   7 -10   1  293.77   16.80
  -7 -10  -1  297.27   15.00
  -7 -10  -1  279.07   17.10
  -7  10  -1  301.07   13.20
   7  10   1  297.27   15.40
   7  10   1  297.97   19.70
   7  10   1  304.07   19.00
  -7  10  -1  307.37   13.70
   7  10   1  275.07   19.80
   8 -10   1   32.60    5.70
   8 -10   1   34.30    6.50
   8 -10   1   37.30    6.40
  -8 -10  -1   35.70    5.70
  -8 -10  -1   23.90    4.80
   8 -10   1   47.70    7.90
  -8  10  -1   30.20    4.40
   8  10   1   29.80    6.60
   8  10   1   30.50    7.20
   8  10   1   37.70    7.30
   8  10   1   39.40    9.70
  -9 -10  -1   27.00    4.30
   9 -10   1   20.50    4.00
  -9  10  -1   32.70    4.00
   9  10   1   36.50    7.20
   9  10   1   28.10    5.00
  -9 -11   1   85.69    6.40
   9 -11  -1   92.59    8.60
   9 -11  -1   86.39    9.20
   9 -11  -1   79.89    7.40
  -9 -11   1   78.99    6.50
   9  11  -1   94.69   10.00
   9  11  -1   83.59   10.10
  -9  11   1   86.49    5.30
   9  11  -1   93.89    9.30
  -8 -11   1  127.09    8.80
  -8 -11   1  120.49    9.20
   8 -11  -1  151.38   10.10
   8 -11  -1  141.79   10.70
   8 -11  -1  143.69   10.90
  -8  11   1  131.79    7.20
   8  11  -1  109.79   13.70
   8  11  -1  126.59   12.80
   8  11  -1  131.19   13.70
   8  11  -1  138.79   10.00
  -7 -11   1  298.07   15.10
   7 -11  -1  303.47   15.50
  -7 -11   1  292.27   15.70
   7 -11  -1  321.47   16.70
   7 -11  -1  274.77   17.60
   7 -11  -1  297.57   15.30
   7  11  -1  277.47   21.30
   7  11  -1  274.67   16.10
   7  11  -1  286.47   19.70
  -7  11   1  308.27   13.40
   7  11  -1  298.77   16.10
  -7  11   1  297.87   13.30
   6 -11  -1  313.07   16.20
  -6 -11   1  314.07   14.80
  -6 -11   1  281.37   16.20
   6 -11  -1  318.17   17.20
   6 -11  -1  297.07   16.00
   6 -11  -1  295.17   18.60
   6  11  -1  302.27   17.00
   6  11  -1  267.47   20.70
   6  11  -1  312.67   16.10
  -6  11   1  307.27   13.60
  -6  11   1  297.57   13.10
   6  11  -1  268.37   20.80
  -5 -11   1  396.16   20.50
   5 -11  -1  397.86   19.70
   5 -11  -1  413.86   20.10
   5 -11  -1  423.16   21.20
   5 -11  -1  449.06   21.30
  -5 -11   1  419.56   18.40
   5  11  -1  418.56   21.10
  -5  11   1  405.16   17.10
   5  11  -1  426.96   20.10
  -5  11   1  426.16   17.70
   5  11  -1  425.96   25.00
   4 -11  -1   -1.00    6.50
   4 -11  -1    0.40    7.40
  -4 -11   1   -5.10    8.30
  -4 -11   1   18.50   22.50
   4 -11  -1   -1.10    5.80
  -4 -11   1   14.60   18.00
   4  11  -1   -0.10    6.70
   4  11  -1    0.30   10.00
  -4  11   1   35.60   29.90
   4  11  -1    5.40    8.10
  -4  11   1   15.20   33.40
  -4  11   1    7.80    3.90
   4  11  -1    0.80    6.20
  -3 -11   1  532.65   32.70
  -3 -11   1  527.65   42.10
  -3  11   1  515.65   20.20
  -3  11   1  491.05   40.50
   3  11  -1  542.05   35.80
  -3  11   1  486.45   41.80
   2 -11  -1  730.43   28.10
  -2 -11   1  754.52   28.50
  -2 -11   1  714.13   36.60
  -2 -11   1  734.33   42.80
   2  11  -1  750.42   38.20
  -2  11   1  727.03   27.90
  -2  11   1  748.73   42.80
   1 -11  -1  338.97   31.50
  -1 -11   1  337.77   27.10
  -1 -11   1  337.07   14.10
  -1 -11   1  335.57   22.70
   1 -11  -1  314.57   13.50
  -1  11   1  296.27   25.20
  -1  11   1  349.67   26.40
   0 -11   1  703.23   34.10
   0 -11  -1  711.03   39.80
   0 -11  -1  634.04   35.20
   0 -11  -1  679.43   25.70
   0  11  -1  670.23   25.70
   0  11   1  640.64   36.10
   0  11   1  675.43   35.70
   0  11  -1  674.93   34.50
   1 -11   1  222.68   29.30
   1 -11   1  251.27   21.60
  -1 -11  -1  235.58   10.40
  -1 -11  -1  239.78   19.90
  -1 -11  -1  252.17   26.20
  -1  11  -1  225.28   10.20
   1  11   1  236.68   31.40
   1  11   1  252.67   22.30
  -1  11  -1  233.68   22.40
  -2 -11  -1  333.07   33.10
  -2 -11  -1  341.87   14.30
  -2 -11  -1  355.06   24.80
   2  11   1  357.56   28.90
  -2  11  -1  335.47   30.40
  -2  11  -1  345.17   14.10
  -3 -11  -1  187.18   25.40
  -3 -11  -1  169.38    8.70
  -3 -11  -1  171.48   42.00
  -3  11  -1  166.88    8.10
  -3  11  -1  130.19   25.10
   4 -11   1   21.00    5.50
   4 -11   1   22.90    7.30
   4 -11   1   21.80    5.40
   4 -11   1   14.80    6.90
  -4 -11  -1   36.60    5.80
   4  11   1   21.80   12.10
   4  11   1   27.30    6.70
   4  11   1   29.50    7.30
  -4  11  -1   29.40    5.40
   4  11   1   15.50    4.90
  -4  11  -1   22.60    4.00
   5 -11   1  292.57   18.70
  -5 -11  -1  304.07   14.30
   5 -11   1  286.47   16.30
  -5  11  -1  319.37   13.80
   5  11   1  278.67   22.30
   5  11   1  341.57   20.90
   5  11   1  298.17   18.00
  -5  11  -1  318.87   14.50
   5  11   1  278.17   17.90
  -6 -11  -1   69.49    7.80
  -6 -11  -1   73.49   13.30
   6 -11   1   58.79    8.90
   6 -11   1   77.79   10.30
   6 -11   1   72.69    9.20
   6 -11   1   66.69    9.20
   6  11   1   75.59   13.20
   6  11   1   67.89    9.00
  -6  11  -1   65.39    6.90
  -6  11  -1   60.89    5.70
   6  11   1   85.19   14.60
   6  11   1   79.09   16.10
  -7 -11  -1  173.38   10.90
   7 -11   1  170.58   11.40
   7 -11   1  180.58   11.80
   7 -11   1  191.48   12.00
   7 -11   1  172.58   12.70
   7  11   1  175.78   16.40
  -7  11  -1  179.88    9.10
   7  11   1  195.98   15.10
   7  11   1  182.18   17.00
   7  11   1  176.18   11.40
   8 -11   1   62.69    6.70
   8 -11   1   67.99    8.40
   8 -11   1   59.89    7.60
  -8 -11  -1   55.19    6.80
   8 -11   1   63.09    6.70
  -8 -11  -1   56.79    7.80
   8  11   1   55.59    7.90
   8  11   1   58.39    7.20
   8  11   1   48.90   10.40
  -8  11  -1   67.19    4.80
   8  11   1   53.49   10.10
   9 -11   1   59.79    5.90
  -9 -11  -1   45.10    6.40
   9  11   1   62.09    7.30
  -9 -12   1    5.80    3.10
   9 -12  -1   15.10    3.80
  -9 -12   1   11.50    3.10
   9 -12  -1   16.10    5.20
   9  12  -1   14.40    5.90
   9  12  -1   12.10    5.70
  -9  12   1   10.10    2.40
  -8 -12   1   48.40    6.70
   8 -12  -1   48.10    7.20
   8 -12  -1   52.89    8.30
   8 -12  -1   56.99    8.50
  -8 -12   1   44.20    6.30
  -8  12   1   43.50    4.50
   8  12  -1   40.00    8.00
   8  12  -1   57.49   11.00
   8  12  -1   42.90    7.90
   8  12  -1   47.10    7.50
  -7 -12   1  250.37   13.80
   7 -12  -1  231.08   13.30
   7 -12  -1  196.08   17.50
   7 -12  -1  269.57   14.70
  -7 -12   1  257.47   12.90
   7  12  -1  232.68   14.20
  -7  12   1  244.68   11.30
   7  12  -1  241.08   14.00
   7  12  -1  233.78   19.90
  -7  12   1  238.48   11.10
   6 -12  -1   24.40    5.10
   6 -12  -1   43.90    9.50
   6 -12  -1   25.10    7.40
  -6 -12   1   40.70    6.80
  -6 -12   1   28.20    5.90
   6 -12  -1   32.50    6.10
   6  12  -1   38.90    7.00
   6  12  -1   37.60    6.20
  -6  12   1   33.90    5.20
   6  12  -1   44.50   10.10
   6  12  -1   33.50    9.90
  -6  12   1   40.20    4.70
  -5 -12   1  372.16   16.20
   5 -12  -1  345.07   17.40
   5 -12  -1  350.96   18.50
  -5 -12   1  336.97   18.00
   5 -12  -1  375.06   18.70
   5 -12  -1  333.57   17.40
   5  12  -1  330.87   22.80
   5  12  -1  370.66   18.80
   5  12  -1  363.56   17.90
  -5  12   1  347.97   15.20
  -5  12   1  350.96   14.70
   5  12  -1  284.67   19.60
   4 -12  -1   53.19   10.10
  -4 -12   1   59.19   10.20
   4 -12  -1   57.39   10.60
   4 -12  -1   64.09   11.30
  -4 -12   1   53.39    6.00
   4 -12  -1   50.99    8.20
  -4  12   1   53.69    4.60
   4  12  -1   59.09   12.20
   4  12  -1   73.49   11.50
   4  12  -1   54.59    9.90
  -3 -12   1  441.86   33.70
  -3 -12   1  444.16   44.70
  -3  12   1  426.26   17.20
  -3  12   1  426.36   46.10
  -3  12   1  425.76   44.40
   3  12  -1  418.86   37.90
  -2 -12   1  680.73   44.80
   2 -12  -1  671.13   26.40
  -2 -12   1  689.53   26.80
  -2 -12   1  713.03   37.80
  -2  12   1  701.33   44.60
  -2  12   1  677.73   26.20
  -1 -12   1  235.48   11.20
   1 -12  -1  245.38   10.80
  -1 -12   1  219.18   21.80
   1 -12  -1  237.68   32.90
  -1 -12   1  288.57   28.80
   1  12  -1  251.17   12.30
  -1  12   1  247.68   11.20
   0 -12  -1  581.54   41.10
   0 -12  -1  574.94   22.30
   0 -12   1  613.94   40.50
   0 -12   1  577.54   22.80
   0 -12  -1  603.84   33.40
   0  12  -1  564.64   33.70
   0  12  -1  570.14   22.30
   0  12   1  585.94   35.40
   0  12   1  496.65   38.50
  -1 -12  -1  397.16   27.50
   1 -12   1  351.66   38.60
  -1 -12  -1  396.36   16.10
  -1 -12  -1  432.56   35.90
   1 -12   1  378.06   30.00
  -1  12  -1  417.16   30.40
  -1  12  -1  388.26   15.90
   1  12   1  433.46   31.20
  -2 -12  -1   71.19    5.30
  -2 -12  -1   66.19   14.50
  -2 -12  -1   58.89   23.50
   2  12   1   74.09   28.50
  -2  12  -1   66.69    4.80
  -2  12  -1   47.90   18.50
   3 -12   1  464.65   22.60
  -3 -12  -1  498.15   20.10
   3 -12   1  525.55   23.40
  -3 -12  -1  497.85   38.00
   3 -12   1  475.15   24.20
  -3  12  -1  512.45   21.60
   3  12   1  501.45   23.50
  -3  12  -1  481.25   51.59
   3  12   1  504.65   22.90
   3  12   1  505.65   22.10
   4 -12   1   20.00    6.60
   4 -12   1   26.30    6.10
   4 -12   1   16.50    5.30
   4 -12   1   22.30    6.80
  -4 -12  -1   31.30    5.50
   4  12   1   15.20    4.70
   4  12   1   22.00   12.30
   4  12   1   25.80    6.80
   4  12   1   10.30    6.90
  -4  12  -1   26.20    4.10
  -5 -12  -1   69.39    6.90
   5 -12   1   65.79    9.70
   5 -12   1   70.09   12.10
   5 -12   1   74.19    9.40
   5 -12   1   67.19    9.10
   5  12   1   72.89   12.10
   5  12   1   69.99    8.80
   5  12   1   63.29    8.90
  -5  12  -1   67.39    5.60
   5  12   1   50.79   11.10
   5  12   1   61.89   13.90
  -5  12  -1   53.49    6.80
   6 -12   1  424.36   24.20
   6 -12   1  492.85   22.40
   6 -12   1  519.45   26.50
  -6 -12  -1  430.36   22.50
   6 -12   1  459.75   21.40
  -6 -12  -1  504.25   24.30
   6 -12   1  487.95   21.80
  -6  12  -1  499.15   19.80
   6  12   1  447.46   27.90
   6  12   1  494.15   28.40
   6  12   1  477.25   21.70
   6  12   1  411.86   23.10
   6  12   1  497.95   26.40
  -7 -12  -1  312.57   16.60
   7 -12   1  332.07   16.20
   7 -12   1  345.17   17.30
   7 -12   1  340.07   16.80
   7 -12   1  313.27   15.90
  -7 -12  -1  305.67   15.40
   7  12   1  327.27   15.90
   7  12   1  289.97   20.30
  -7  12  -1  322.47   14.00
   7  12   1  351.66   23.30
   7  12   1  377.86   23.20
   8 -12   1    2.70    3.90
  -8 -12  -1    2.10    3.50
  -8 -12  -1   -0.40    3.90
   8 -12   1    6.10    4.00
   8 -12   1    1.50    4.00
   8 -12   1    3.00    3.20
  -8  12  -1    0.80    2.20
   8  12   1    1.60    4.80
   8  12   1    3.50    3.60
   8  12   1   -3.60    5.50
   9  12   1   83.89    7.50
   9 -13  -1    4.10    4.10
  -9 -13   1    4.20    3.00
   9 -13  -1    7.80    4.00
  -9 -13   1    7.60    3.60
  -9  13   1    4.60    2.60
   9  13  -1    4.90    5.30
   9  13  -1   10.90    5.50
   9  13  -1    5.60    5.20
   8 -13  -1  269.67   13.00
  -8 -13   1  246.88   12.20
   8 -13  -1  278.87   13.90
  -8 -13   1  253.67   12.40
   8 -13  -1  245.28   13.50
  -8  13   1  237.88   10.80
   8  13  -1  251.17   16.00
   8  13  -1  246.58   15.30
   8  13  -1  220.28   16.20
   8  13  -1  248.48   12.80
   7 -13  -1  247.08   17.00
   7 -13  -1  246.08   13.80
  -7 -13   1  255.27   13.90
   7 -13  -1  270.37   15.00
  -7 -13   1  254.87   13.30
   7  13  -1  268.37   17.00
   7  13  -1  253.77   14.30
  -7  13   1  254.67   11.50
   7  13  -1  241.18   14.40
   7  13  -1  259.17   20.40
  -6 -13   1  300.67   15.40
   6 -13  -1  302.67   16.40
  -6 -13   1  285.97   14.30
   6 -13  -1  279.47   16.70
   6 -13  -1  281.17   15.20
   6  13  -1  282.07   16.60
   6  13  -1  288.97   21.20
   6  13  -1  285.57   15.40
  -6  13   1  282.27   12.70
   6  13  -1  251.77   20.70
   5 -13  -1   58.79    9.50
   5 -13  -1   71.39    9.10
  -5 -13   1   70.19    7.30
  -5  13   1   72.49    6.70
   5  13  -1   64.19   16.80
   5  13  -1   88.59   13.40
   5  13  -1   69.29    9.30
   5  13  -1   59.49   13.30
  -4 -13   1  665.23   28.50
   4 -13  -1  706.23   29.90
  -4 -13   1  691.23   27.30
   4 -13  -1  721.23   29.40
   4 -13  -1  647.44   28.70
   4  13  -1  679.33   33.10
   4  13  -1  630.34   30.00
  -4  13   1  696.03   26.40
   4  13  -1  695.03   29.20
   4  13  -1  673.23   29.90
   3 -13  -1  230.98   15.80
   3 -13  -1  281.87   16.80
  -3 -13   1  314.97   35.80
  -3 -13   1  254.17   14.30
   3 -13  -1  286.77   15.60
   3  13  -1  262.67   16.20
   3  13  -1  200.18   37.30
  -3  13   1  211.98   36.30
   3  13  -1  271.97   19.90
   3  13  -1  265.87   17.00
  -3  13   1  280.87   51.49
   3  13  -1  266.27   16.30
   2 -13  -1  280.07   12.30
  -2 -13   1  296.07   30.00
  -2 -13   1  274.57   38.30
  -2  13   1  266.67   39.10
  -2  13   1  271.67   11.70
   2  13  -1  250.87   32.10
   1 -13  -1  118.39    6.50
  -1 -13   1  115.79    7.30
   1 -13  -1  112.59   27.30
  -1 -13   1  127.69   18.10
  -1 -13   1   95.09   22.00
  -1  13   1   89.39   19.80
  -1  13   1  111.59    7.30
   1  13  -1   93.79   17.70
   1  13  -1  111.79    7.90
   0 -13   1    0.80   14.00
   0 -13  -1   -8.50   19.50
   0 -13   1  -11.00   19.00
   0 -13  -1    5.20    2.50
   0  13  -1    4.20    2.50
   0  13   1   -4.60   19.70
   0  13  -1   -5.40   14.50
  -1 -13  -1  807.32   53.09
  -1 -13  -1  741.73   43.10
  -1 -13  -1  767.52   29.30
   1  13   1  750.32   46.20
  -1  13  -1  755.92   45.80
  -1  13  -1  772.62   29.10
  -2 -13  -1   -1.90   16.80
  -2 -13  -1   17.10    2.80
   2 -13   1   23.40    7.60
  -2 -13  -1   48.10   37.90
   2 -13   1   18.30    5.70
   2  13   1   11.50    6.50
  -2  13  -1   19.60    3.70
   2  13   1   24.10    6.20
  -2  13  -1   39.40   22.70
  -3 -13  -1   20.40    3.40
   3 -13   1   22.50    6.90
   3 -13   1   18.30    6.50
   3 -13   1   17.20    5.90
  -3 -13  -1   19.10    7.30
   3 -13   1   23.00    7.50
   3  13   1   19.80    6.80
   3  13   1   17.30    6.00
   3  13   1   -4.10   12.90
   3  13   1   21.60    5.90
  -3  13  -1   19.60    3.80
   4 -13   1   81.69    9.30
   4 -13   1   70.19    9.20
   4 -13   1   64.89   10.30
   4 -13   1   86.69   11.80
  -4 -13  -1   92.49    6.90
  -4 -13  -1   71.19   12.20
  -4  13  -1   70.79    5.50
   4  13   1   54.59   12.40
   4  13   1   72.09   10.50
   4  13   1   85.79    9.00
   4  13   1   64.49   11.40
  -5 -13  -1  461.55   19.00
  -5 -13  -1  433.26   21.20
   5 -13   1  411.86   20.40
   5 -13   1  476.85   21.30
   5 -13   1  432.76   20.30
   5 -13   1  435.56   22.20
   5  13   1  362.26   24.30
   5  13   1  428.16   21.40
   5  13   1  451.75   20.40
   5  13   1  429.26   21.40
  -5  13  -1  433.56   17.90
   5  13   1  411.36   26.80
   6 -13   1   11.90    5.00
   6 -13   1    6.60    4.30
   6 -13   1   -0.60    7.00
  -6 -13  -1   10.00    3.90
   6 -13   1    9.90    5.30
  -6 -13  -1    0.30    6.00
   6 -13   1    3.00    4.70
   6  13   1   -8.40    7.00
  -6  13  -1    8.90    2.70
   6  13   1    4.70    4.30
   6  13   1   -1.80    8.30
   6  13   1   16.40    8.10
   6  13   1    0.70    9.10
   7 -13   1  145.89   10.10
  -7 -13  -1  138.89    9.40
   7 -13   1  155.18   10.30
   7 -13   1  144.89   11.10
   7 -13   1  143.59    9.90
  -7 -13  -1  146.89   10.70
   7  13   1  179.78   16.70
   7  13   1  130.39    9.50
   7  13   1  140.09   15.20
  -7  13  -1  146.89    7.70
   7  13   1  151.18   14.70
   8 -13   1   38.60    5.80
  -8 -13  -1   38.50    6.10
  -8 -13  -1   31.90    5.90
   8 -13   1   34.00    7.40
   8 -13   1   33.30    4.70
   8 -13   1   30.70    5.90
  -8  13  -1   25.20    3.80
   8  13   1   20.20    5.30
   8  13   1   34.70    5.60
   8  13   1   28.90    7.80
   9 -14  -1   59.89    5.80
   9 -14  -1   57.09    6.50
  -9 -14   1   52.79    4.60
   9  14  -1   48.40    8.70
   9  14  -1   42.00    6.00
  -8 -14   1   71.49    6.40
   8 -14  -1   69.79    8.50
   8 -14  -1   68.19    7.80
   8 -14  -1   75.29    6.90
  -8 -14   1   69.39    6.50
   8  14  -1   82.09   10.60
   8  14  -1   52.59   10.60
  -8  14   1   68.49    4.90
   8  14  -1   73.49    7.00
   8  14  -1   67.79   10.90
   7 -14  -1   93.39    8.70
  -7 -14   1   94.09    8.60
   7 -14  -1   95.49   12.40
  -7 -14   1   95.59    8.00
   7  14  -1  109.39   12.30
   7  14  -1   99.19    9.00
   7  14  -1   90.99   13.00
   7  14  -1  125.09   16.10
  -7  14   1   90.39    6.20
   6 -14  -1   72.69    8.80
  -6 -14   1   72.09    8.70
   6 -14  -1   72.69   10.90
  -6 -14   1   78.09    8.80
   6 -14  -1   72.29   10.40
  -6  14   1   76.79    6.30
   6  14  -1   81.89   11.10
   6  14  -1   54.69   11.00
   6  14  -1   69.79    9.00
   6  14  -1   95.09   15.80
   5 -14  -1  200.98   13.80
  -5 -14   1  206.08   11.40
  -5 -14   1  216.78   12.80
   5 -14  -1  203.78   14.00
   5 -14  -1  197.28   12.80
   5  14  -1  205.38   13.00
   5  14  -1  171.98   18.60
  -5  14   1  201.38    9.90
   5  14  -1  212.28   14.60
  -4 -14   1   91.99    7.20
   4 -14  -1   73.19   10.80
   4 -14  -1   86.39   11.10
   4 -14  -1   84.39    9.80
  -4 -14   1   86.29    9.20
   4  14  -1   78.69   16.50
   4  14  -1   84.39   10.10
   4  14  -1   73.69   11.40
  -4  14   1   72.99    5.70
   4  14  -1   81.89   10.90
   3 -14  -1  363.46   19.00
  -3 -14   1  361.56   17.10
   3 -14  -1  376.56   18.00
  -3 -14   1  335.17   20.50
  -3 -14   1  365.16   15.60
   3 -14  -1  348.17   18.70
   3 -14  -1  349.37   18.40
  -3  14   1  345.87   20.60
   3  14  -1  336.17   19.00
   3  14  -1  326.37   18.80
   3  14  -1  344.27   18.90
   3  14  -1  360.26   22.50
  -3  14   1  358.66   14.60
  -2 -14   1  200.68   11.90
   2 -14  -1  189.48   14.20
  -2 -14   1  208.18   35.00
  -2 -14   1  282.87   55.59
   2 -14  -1  201.88   10.00
   2 -14  -1  189.58   14.90
   2 -14  -1  196.48   10.70
  -2 -14   1  179.88   21.90
  -2  14   1  205.78    9.30
   2  14  -1  206.18   14.60
   2  14  -1  203.58   17.80
   2  14  -1  241.78   29.70
   2  14  -1  189.28   14.60
  -2  14   1  204.28   33.60
  -1 -14   1   98.79   10.70
   1 -14  -1   75.29   11.10
  -1 -14   1   91.79   19.30
  -1 -14   1   97.79   27.20
   1 -14  -1   64.29   31.70
   1 -14  -1   76.19    5.50
   1  14  -1   48.80   20.90
  -1  14   1   52.89    6.80
  -1  14   1   82.19   23.50
   1  14  -1   65.49    7.50
   0 -14   1   63.49   26.70
   0 -14   1   16.80   19.30
   0 -14  -1   58.89    4.90
   0 -14  -1   39.40   26.70
   0  14   1   75.69   22.60
   0  14  -1   64.09    5.40
   0  14  -1   72.49   20.70
   1 -14   1   64.09    9.50
  -1 -14  -1   51.69    4.90
  -1 -14  -1   51.99   19.80
   1 -14   1   47.40    9.30
   1 -14   1   50.79    8.70
   1  14   1   48.10    9.10
  -1  14  -1   46.40    4.50
  -1  14  -1   80.59   23.90
   1  14   1   38.10   24.70
   1  14   1   51.49    8.20
   2 -14   1  959.00   40.30
  -2 -14  -1  950.80   37.90
  -2 -14  -1 1012.10   36.90
   2 -14   1  992.60   39.60
   2 -14   1  967.40   39.70
   2 -14   1  940.91   39.20
  -2  14  -1 1009.60   36.70
   2  14   1  967.60   39.10
   2  14   1  982.70   39.40
   2  14   1  906.01   38.70
   3 -14   1  167.88   19.10
   3 -14   1  152.18   12.10
  -3 -14  -1  150.58    8.80
   3 -14   1  169.18   13.20
   3 -14   1  167.98   13.10
   3 -14   1  174.28   11.90
  -3 -14  -1  167.88   12.40
   3  14   1  152.68   12.30
  -3  14  -1  162.18    8.10
   3  14   1  115.79   23.20
   3  14   1  137.59   11.10
   3  14   1  158.28   13.10
  -4 -14  -1  106.69   10.90
   4 -14   1   84.19   11.00
   4 -14   1   78.69   10.20
  -4 -14  -1   93.79    7.30
   4 -14   1   86.99    9.70
  -4  14  -1   92.29    6.10
   4  14   1   82.89   13.30
   4  14   1   75.89   13.90
   4  14   1   79.59    9.10
  -5 -14  -1  483.05   19.70
   5 -14   1  451.25   21.10
   5 -14   1  438.86   21.00
  -5 -14  -1  454.65   21.20
   5 -14   1  437.16   22.50
   5 -14   1  483.25   21.80
   5  14   1  451.25   21.80
   5  14   1  436.56   22.00
   5  14   1  449.95   25.00
   5  14   1  475.25   21.20
   5  14   1  442.36   27.40
   5  14   1  407.76   25.70
  -5  14  -1  470.55   18.70
  -6 -14  -1   67.49    7.60
   6 -14   1   63.49    8.40
  -6 -14  -1   70.39    9.30
   6 -14   1   60.29   11.80
   6 -14   1   42.60   13.60
   6 -14   1   57.99    9.30
   6 -14   1   64.69    9.50
   6  14   1   85.59   15.00
   6  14   1  100.29   16.70
  -6  14  -1   64.19    5.60
   6  14   1   73.29    8.20
   6  14   1   66.19   14.30
   6  14   1   61.39   11.00
   7 -14   1  141.79    9.60
   7 -14   1  143.99   10.10
  -7 -14  -1  129.49    9.40
   7 -14   1  143.29    9.40
   7 -14   1  108.59    9.60
  -7 -14  -1  120.09    8.60
  -7  14  -1  126.29    7.00
   7  14   1  136.39    9.00
   7  14   1  112.49   13.90
   7  14   1  118.79   13.70
   7  14   1  146.49   15.90
  -8 -14  -1   19.10    3.80
   8 -14   1   16.20    3.70
  -8 -14  -1   18.30    6.80
   8 -14   1   19.20    3.80
   8 -14   1   18.80    3.90
   8  14   1   16.60    5.40
   8  14   1   11.40    3.40
   8  14   1   31.20    6.80
  -8  14  -1   22.70    3.70
   9 -15  -1   41.30    5.20
   9 -15  -1   33.40    4.80
  -9 -15   1   36.00    4.10
   8 -15  -1   12.80    3.50
   8 -15  -1   10.80    3.80
  -8 -15   1   11.30    4.70
  -8 -15   1   14.00    3.30
   8  15  -1   21.90    6.20
   8  15  -1    8.40    5.60
  -8  15   1    6.60    2.60
   8  15  -1   14.70    6.20
   7 -15  -1   35.10    6.80
   7 -15  -1   37.20    8.60
  -7 -15   1   35.70    6.10
  -7 -15   1   17.80    4.20
   7 -15  -1   27.20    5.40
   7  15  -1   10.70    7.70
   7  15  -1   17.50    6.70
   7  15  -1   18.60    5.50
   7  15  -1    8.80    6.80
   7  15  -1   26.60    5.30
  -7  15   1   30.90    4.30
   6 -15  -1   99.69   10.90
  -6 -15   1   98.19    8.50
  -6 -15   1   96.79    9.20
   6 -15  -1  104.09   10.90
   6 -15  -1  104.89    9.30
  -6  15   1  102.09    6.50
   6  15  -1   80.09   15.00
   6  15  -1  106.69   15.70
   6  15  -1  103.89   12.10
   6  15  -1   85.09    9.50
  -5 -15   1   60.39    8.60
   5 -15  -1   41.60    9.70
   5 -15  -1   53.99   10.10
  -5 -15   1   51.39    6.80
   5 -15  -1   49.60    8.60
  -5  15   1   48.10    5.10
   5  15  -1   43.40    7.40
   5  15  -1   35.30   10.10
   5  15  -1   47.90    8.80
   4 -15  -1  701.93   30.90
   4 -15  -1  595.54   32.60
  -4 -15   1  689.73   34.80
  -4 -15   1  719.23   27.90
  -4 -15   1  641.44   31.90
  -4  15   1  699.23   36.60
  -4  15   1  734.13   26.70
   4  15  -1  661.03   33.70
   3 -15  -1  125.29   11.70
   3 -15  -1   98.79   12.50
  -3 -15   1  106.49    7.50
  -3 -15   1  117.29   14.00
   3 -15  -1  111.99   11.20
   3 -15  -1  123.79   12.20
  -3 -15   1  111.79    9.70
  -3  15   1  111.89   14.60
   3  15  -1  104.39   12.40
   3  15  -1  130.59   12.70
   3  15  -1  102.59   11.70
  -3  15   1  105.49    6.60
   3  15  -1   86.19   15.50
  -2 -15   1   55.69    9.40
  -2 -15   1   58.29    8.20
   2 -15  -1   51.99    7.00
   2 -15  -1   63.89    6.60
   2 -15  -1   60.19   10.30
   2  15  -1   70.19   14.90
   2  15  -1   62.59   34.30
   2  15  -1   41.20    9.80
   2  15  -1   56.49    8.30
  -2  15   1   58.79    8.80
   2  15  -1   70.19   11.10
   1 -15  -1   14.20    4.70
   1 -15  -1   13.20    3.70
   1 -15  -1   16.30    7.10
  -1 -15   1   12.30    6.40
  -1 -15   1    1.10   23.70
  -1 -15   1   13.70    4.70
   1  15  -1    6.40   27.00
  -1  15   1    5.90    6.30
   1  15  -1   14.10    7.00
   1  15  -1    7.50    7.40
  -1  15   1   18.90   29.90
   1  15  -1    7.50    7.10
   0 -15   1  148.09   16.80
   0 -15   1  141.99   27.30
   0 -15   1  128.69    9.80
   0 -15  -1  136.09    8.70
   0 -15   1  152.58    9.00
   0 -15  -1  136.49    7.60
   0 -15   1  132.39   12.30
   0  15  -1  132.59   14.40
   0  15  -1  132.59    7.70
   0  15   1  142.39   13.60
   0  15  -1  114.39   28.60
   0  15   1  132.49   11.50
   0  15   1  150.98   31.90
   1 -15   1  194.78   13.30
   1 -15   1  199.18   15.30
   1 -15   1  203.28   14.50
  -1 -15  -1  192.78    9.50
  -1 -15  -1  188.78   10.70
  -1  15  -1  194.68    9.30
   1  15   1  210.08   30.60
   1  15   1  188.88   14.20
  -1  15  -1  190.88   17.00
   1  15   1  199.58   12.60
   2 -15   1  232.98   15.10
  -2 -15  -1  217.98   10.40
  -2 -15  -1  200.88   12.30
   2 -15   1  224.98   13.70
   2 -15   1  201.58   14.70
   2 -15   1  219.08   15.90
   2  15   1  207.68   13.70
  -2  15  -1  218.18    9.90
   2  15   1  210.28   13.50
   2  15   1  190.18   13.40
  -3 -15  -1  260.77   18.30
   3 -15   1  262.07   17.10
  -3 -15  -1  293.27   15.20
   3 -15   1  296.97   16.80
   3 -15   1  320.47   16.50
   3 -15   1  301.97   16.30
   3 -15   1  287.47   20.50
  -3 -15  -1  313.37   13.70
   3  15   1  261.57   25.40
  -3  15  -1  318.87   13.00
   3  15   1  287.77   16.50
   3  15   1  309.47   17.00
   3  15   1  297.07   15.60
   4 -15   1  176.88   13.90
   4 -15   1  181.68   12.70
  -4 -15  -1  189.48   12.60
   4 -15   1  217.88   13.30
   4 -15   1  179.38   14.00
   4  15   1  206.48   21.40
  -4  15  -1  203.28    9.70
   4  15   1  196.18   12.50
   4  15   1  184.58   13.90
   4  15   1  184.58   13.00
   5 -15   1    8.00    4.80
  -5 -15  -1   13.50    7.70
  -5 -15  -1    8.90    3.70
   5 -15   1   16.80    6.30
   5 -15   1    6.10    7.60
   5 -15   1   13.90    9.30
   5  15   1    5.10    4.60
   5  15   1    8.00    6.10
   5  15   1   -0.10    9.50
   5  15   1   13.00   10.20
   5  15   1    5.70    6.80
  -5  15  -1    9.30    2.70
   5  15   1   -3.00    7.60
  -6 -15  -1   77.89    7.40
   6 -15   1   72.39   10.90
   6 -15   1   84.19    8.80
   6 -15   1   66.59   11.00
   6 -15   1   74.19    8.00
   6 -15   1   63.29    8.70
   6 -15   1   54.89    9.40
  -6 -15  -1   85.89    9.30
   6  15   1   70.69    7.80
   6  15   1   86.79   14.20
  -6  15  -1   76.49    5.70
   6  15   1   76.09   12.90
   7 -15   1   45.70    6.50
  -7 -15  -1   36.90    6.60
   7 -15   1   47.50    7.30
   7 -15   1   48.00    6.90
  -7 -15  -1   40.20    6.30
   7  15   1   41.40    7.80
   7  15   1   31.50    8.60
   7  15   1   46.50    7.70
  -7  15  -1   42.00    4.40
   7  15   1   42.60    6.40
   8 -15   1   33.00    5.20
  -8 -15  -1   38.10    6.10
   8 -15   1   36.70    5.50
  -8 -15  -1   30.40    5.20
   8  15   1   23.90    5.40
  -8  15  -1   37.10    4.20
  -8 -16   1   38.60    4.80
   8 -16  -1   29.20    5.70
   8 -16  -1   38.80    5.40
  -8 -16   1   32.80    5.50
   8  16  -1   29.00    8.10
  -8  16   1   38.60    4.90
   8  16  -1   49.50   10.00
   8  16  -1   30.60    6.20
  -7 -16   1   49.10    6.50
  -7 -16   1   63.39    6.60
   7 -16  -1   65.49    7.80
   7 -16  -1   70.39    9.50
   7 -16  -1   66.59    7.30
   7  16  -1   59.29    8.10
  -7  16   1   53.39    5.10
   7  16  -1   53.49   11.60
   7  16  -1   80.49   12.40
   7  16  -1   66.19    7.20
   6 -16  -1   29.50    6.10
  -6 -16   1   30.10    5.20
   6 -16  -1   41.60    8.80
   6 -16  -1   38.70    7.60
  -6 -16   1   24.50    4.50
   6  16  -1   35.30    6.50
   6  16  -1   34.70    5.70
   6  16  -1   21.20    8.90
   6  16  -1   19.10    8.30
  -6  16   1   29.60    4.70
  -5 -16   1  307.07   15.30
   5 -16  -1  282.37   15.70
  -5 -16   1  306.07   14.50
   5 -16  -1  281.67   16.40
   5 -16  -1  309.37   16.90
   5  16  -1  297.57   16.30
  -5  16   1  305.07   13.10
   5  16  -1  296.17   17.10
   5  16  -1  275.77   21.20
   4 -16  -1  570.84   24.70
  -4 -16   1  564.24   23.00
  -4 -16   1  557.14   23.80
  -4 -16   1  495.15   28.00
   4 -16  -1  534.95   24.10
   4 -16  -1  561.04   27.50
   4 -16  -1  569.54   25.30
  -4  16   1  558.14   22.20
   4  16  -1  551.44   25.70
   4  16  -1  531.75   24.50
   4  16  -1  540.15   28.60
  -4  16   1  533.55   27.60
   4  16  -1  526.05   25.10
  -3 -16   1   39.70    8.60
  -3 -16   1   38.80    7.50
   3 -16  -1   33.70    7.60
  -3 -16   1   34.80    5.70
   3 -16  -1   21.60    6.20
   3 -16  -1   30.80    6.20
   3 -16  -1   26.40    7.00
   3  16  -1   43.80    7.70
   3  16  -1   23.00    6.50
  -3  16   1   27.00    8.10
  -3  16   1   31.80    4.80
   3  16  -1   18.40    6.40
   3  16  -1   26.20    8.90
  -2 -16   1   26.40    6.70
   2 -16  -1   27.90    6.10
   2 -16  -1   31.60    4.60
   2 -16  -1   24.30    4.50
  -2 -16   1   34.80    5.50
  -2 -16   1   26.00    5.00
   2 -16  -1   28.10    6.50
   2  16  -1   17.00    6.40
   2  16  -1   30.90    6.80
  -2  16   1   24.60    6.80
  -2  16   1   28.40    5.50
   2  16  -1   15.60    8.20
   1 -16  -1  188.68   10.10
  -1 -16   1  227.88   28.40
  -1 -16   1  178.68   13.20
   1 -16  -1  179.88   14.00
   1 -16  -1  191.78    9.50
  -1 -16   1  194.68   11.00
  -1 -16   1  192.28   10.00
   1  16  -1  163.18   14.20
  -1  16   1  176.08   16.70
   1  16  -1  196.58   15.00
  -1  16   1  195.08   13.30
   0 -16  -1  186.58   17.50
   0 -16   1  184.88   17.80
   0 -16   1  225.58   14.30
   0 -16   1  198.88   12.30
   0 -16   1  231.18   11.80
   0 -16  -1  221.48   11.20
   0 -16  -1  233.28   10.50
   0  16  -1  232.88   10.70
   0  16  -1  232.78   15.90
   0  16   1  241.98   15.40
   0  16   1  188.08   18.80
   0  16   1  183.88   44.50
   0  16   1  210.78   13.40
  -1 -16  -1   40.30    5.00
  -1 -16  -1   34.60    5.00
   1 -16   1   65.29   12.20
   1 -16   1   18.00   14.50
   1 -16   1   33.30    7.00
  -1  16  -1   36.20    5.00
   1  16   1   49.20    9.30
   1  16   1   48.80    9.90
   1  16   1   23.20   11.80
  -1  16  -1   24.20    8.50
   2 -16   1   48.40    8.60
  -2 -16  -1   39.40    7.40
   2 -16   1   24.20    6.60
  -2 -16  -1   35.60    5.20
   2 -16   1   43.30    7.90
  -2 -16  -1   37.60    6.90
   2 -16   1   33.90    7.30
   2  16   1   28.30    6.30
   2  16   1   23.30   11.00
   2  16   1   24.20    6.00
  -2  16  -1   30.90    4.50
   2  16   1   44.60    7.10
  -3 -16  -1  156.08   11.30
  -3 -16  -1  172.38    9.10
   3 -16   1  154.28   13.10
   3 -16   1  128.59   12.60
   3 -16   1  156.78   12.10
   3  16   1  148.29   12.50
  -3  16  -1  159.78    8.30
   3  16   1  150.38   12.60
   3  16   1  170.28   12.10
   3  16   1  142.29   24.30
   4 -16   1   44.70    8.80
  -4 -16  -1   46.90    8.30
   4 -16   1   69.69   10.70
   4 -16   1   74.59   12.10
   4 -16   1   55.39    9.00
   4  16   1   60.89    8.80
  -4  16  -1   70.69    5.50
   4  16   1   63.79    9.60
   4  16   1   43.10    7.30
   4  16   1   55.99   12.20
   5 -16   1  360.06   17.30
   5 -16   1  361.96   18.30
   5 -16   1  345.37   18.70
   5 -16   1  324.77   18.00
   5 -16   1  373.26   18.20
  -5 -16  -1  364.66   16.10
  -5 -16  -1  346.27   17.10
   5  16   1  373.46   17.60
   5  16   1  335.87   18.20
   5  16   1  312.57   22.30
  -5  16  -1  355.16   15.00
   5  16   1  357.96   24.20
   5  16   1  336.57   18.00
   6 -16   1  176.98   13.00
  -6 -16  -1  178.38   10.70
   6 -16   1  175.68   15.20
  -6 -16  -1  172.58   10.00
   6  16   1  168.38   18.80
   6  16   1  144.89   21.80
  -6  16  -1  183.58    8.70
   7 -16   1   82.59    7.40
   7 -16   1   91.19    7.50
   7 -16   1   79.59    6.80
  -7 -16  -1   73.89    6.70
   7  16   1   85.39   15.60
  -7  16  -1   75.99    5.30
   7  16   1   65.39   10.60
   7  16   1   69.19    6.60
  -8 -16  -1   15.90    3.10
   8 -16   1   16.90    2.90
   8  16   1   21.50    4.90
   8 -17  -1   87.59    7.00
   8 -17  -1   80.09    6.50
  -8 -17   1   92.89    5.80
  -8 -17   1   95.19    6.60
   8  17  -1   87.49   10.40
   8  17  -1  103.99   10.30
   7 -17  -1   62.49    6.60
   7 -17  -1   72.89    9.40
   7 -17  -1   57.49    7.10
  -7 -17   1   53.59    6.20
  -7 -17   1   50.59    5.70
   7  17  -1   55.89    8.10
   7  17  -1   60.29   11.90
   7  17  -1   46.80    6.40
  -7  17   1   55.09    5.10
   7  17  -1   72.09   11.20
   7  17  -1   62.39    7.80
   6 -17  -1  144.89   10.40
   6 -17  -1  150.08   14.10
  -6 -17   1  140.19    9.00
   6 -17  -1  165.08   15.10
  -6 -17   1  129.99    9.30
  -6  17   1  127.79    7.50
   6  17  -1  131.89   18.00
   6  17  -1  126.19   15.20
   6  17  -1  134.09   10.10
   6  17  -1  144.79   16.90
   5 -17  -1   85.79    9.40
  -5 -17   1   92.29    8.00
  -5 -17   1   95.89    8.70
   5 -17  -1   86.29    9.80
   5 -17  -1   79.69   10.50
   5  17  -1  108.49    9.90
   5  17  -1   83.59   14.90
   5  17  -1   85.69   10.90
  -5  17   1   82.29    6.30
   4 -17  -1  204.78   13.60
   4 -17  -1  206.98   16.70
   4 -17  -1  198.48   14.30
   4 -17  -1  186.58   13.00
  -4 -17   1  216.88   12.20
  -4 -17   1  214.98   11.50
  -4 -17   1  180.28   18.30
   4  17  -1  227.18   18.50
  -4  17   1  212.98   10.10
  -4  17   1  204.08   18.00
   4  17  -1  225.68   13.90
   4  17  -1  196.48   14.50
  -3 -17   1  165.28    9.70
   3 -17  -1  164.58   12.20
   3 -17  -1  156.48   13.00
  -3 -17   1  169.18   10.70
  -3 -17   1  164.28   14.30
  -3  17   1  165.28   18.60
   3  17  -1  152.58   16.10
   3  17  -1  171.68   14.80
  -3  17   1  167.58    8.80
   3  17  -1  169.58   13.70
   2 -17  -1   12.10    4.20
  -2 -17   1    7.00    3.40
  -2 -17   1   13.40    4.60
   2 -17  -1   14.80    6.10
  -2 -17   1   14.20    6.10
   2 -17  -1   17.20    5.70
  -2  17   1   20.20    4.00
   2  17  -1   17.20    6.70
  -2  17   1   20.10    6.50
  -1 -17   1   96.39    7.40
   1 -17  -1  101.79    9.60
   1 -17  -1   95.29    6.90
   1 -17  -1   96.29   12.20
  -1 -17   1   75.89   10.50
   1 -17  -1   96.79    7.50
  -1 -17   1  139.59   23.20
  -1 -17   1   86.29    8.00
   1  17  -1   88.59   12.50
   1  17  -1   92.99   11.70
  -1  17   1   64.09   14.30
  -1  17   1   98.89   10.40
   0 -17  -1  150.48   15.60
   0 -17  -1  136.19    8.80
   0 -17  -1  141.99    8.00
   0 -17   1  120.59   15.00
   0 -17   1  133.19   10.00
   0 -17   1  135.29   11.80
   0 -17   1  129.19    9.50
   0  17  -1  118.89    8.60
   0  17   1  149.59   13.10
   0  17   1  143.99   16.80
   0  17  -1  124.89   13.30
   0  17   1  146.69   10.90
  -1 -17  -1  263.77   12.10
   1 -17   1  260.57   16.60
   1 -17   1  262.87   15.60
  -1 -17  -1  249.38   12.80
  -1 -17  -1  273.47   14.70
  -1  17  -1  255.47   17.50
  -1  17  -1  266.47   11.90
   1  17   1  234.58   14.60
   1  17   1  254.17   15.50
   1  17   1  262.77   21.80
   2 -17   1    0.60    7.30
   2 -17   1   17.40    7.10
   2 -17   1    5.30    5.40
  -2 -17  -1    9.70    4.70
  -2 -17  -1    8.20    3.10
   2  17   1   11.40    5.60
  -2  17  -1   22.40    9.70
   2  17   1    5.50    6.90
  -2  17  -1   10.00    3.00
   2  17   1   14.80    6.80
   2  17   1   21.10   10.70
  -3 -17  -1  147.59   13.50
   3 -17   1  142.29   11.60
  -3 -17  -1  136.39    8.50
   3 -17   1  109.69   12.20
  -3 -17  -1  146.59   10.00
   3 -17   1  110.19   14.80
   3 -17   1  130.69   11.30
  -3  17  -1  124.89    7.60
   3  17   1  175.48   21.80
   3  17   1  143.89   11.50
   3  17   1  131.89   11.90
   3  17   1  132.39   11.50
  -4 -17  -1  242.28   13.20
   4 -17   1  222.58   15.00
  -4 -17  -1  248.78   12.20
   4 -17   1  243.68   14.50
   4 -17   1  242.78   14.10
   4  17   1  249.78   22.00
   4  17   1  249.28   15.10
   4  17   1  232.38   14.00
   4  17   1  239.28   14.80
  -4  17  -1  238.08   11.10
   5 -17   1  256.07   13.50
  -5 -17  -1  244.08   12.90
   5 -17   1  255.47   15.00
   5 -17   1  247.68   14.10
  -5 -17  -1  245.78   12.30
   5 -17   1  226.78   14.40
   5  17   1  210.58   14.20
   5  17   1  228.38   18.40
  -5  17  -1  247.28   11.10
   5  17   1  243.18   14.50
   5  17   1  255.07   13.50
   5  17   1  223.48   20.80
   6 -17   1   44.50    8.10
   6 -17   1   65.89    7.40
   6 -17   1   45.70    6.60
   6 -17   1   62.79   12.90
  -6 -17  -1   48.10    6.20
   6 -17   1   45.50    7.60
  -6 -17  -1   55.79    6.90
   6  17   1   36.00    8.50
   6  17   1   34.90    6.30
   6  17   1   55.09   10.10
  -6  17  -1   58.79    4.90
  -7 -17  -1    5.20    3.40
   7 -17   1    3.90    3.30
   7 -17   1    5.70    3.40
   7 -17   1    5.50    3.20
  -7 -17  -1    5.40    3.00
   7  17   1    8.50    5.30
  -7  17  -1    5.10    2.40
   7  17   1    8.10    3.20
   8 -17   1   63.69    5.40
   8  17   1   68.59    7.20
   8 -18  -1   29.90    4.70
   8 -18  -1   41.80    5.40
  -8 -18   1   31.70    4.10
   8  18  -1   26.00    6.30
  -7 -18   1  107.99    6.70
   7 -18  -1  108.99    8.10
   7 -18  -1   97.49    7.40
   7 -18  -1  108.99    9.70
   7  18  -1   94.59   11.80
   7  18  -1   98.19   11.60
   7  18  -1   96.09    7.40
  -7  18   1   89.79    6.90
   7  18  -1   85.59   12.30
  -6 -18   1   50.39    6.30
   6 -18  -1   40.80    6.00
  -6 -18   1   55.99    6.30
   6 -18  -1   50.09    7.30
  -6  18   1   37.90    5.30
   6  18  -1   53.29    7.20
   6  18  -1   44.50    8.60
   6  18  -1   37.30    8.10
  -5 -18   1   53.59    7.30
  -5 -18   1   74.49    7.30
   5 -18  -1   63.59    8.80
   5  18  -1   75.69   14.00
  -5  18   1   61.49    5.90
   5  18  -1   59.19   10.00
   5  18  -1   57.19    9.10
   4 -18  -1    5.10    5.20
  -4 -18   1    5.60    3.80
  -4 -18   1   15.70    9.30
  -4 -18   1    5.40    4.30
   4 -18  -1   -1.30    8.20
   4 -18  -1    2.50    5.70
   4  18  -1   -7.00    5.50
  -4  18   1    2.20    3.10
  -4  18   1   15.90    8.10
   4  18  -1   -2.40    8.20
   4  18  -1    1.40    5.70
   3 -18  -1   57.19    9.50
  -3 -18   1   67.49    9.30
   3 -18  -1   57.19    7.80
  -3 -18   1   58.79    7.60
  -3 -18   1   48.60    6.90
   3 -18  -1   85.39   12.50
   3  18  -1   48.70    8.70
  -3  18   1   52.79    6.60
   3  18  -1   83.69   12.60
   2 -18  -1   22.20    5.40
   2 -18  -1   13.20    4.50
   2 -18  -1    9.20    5.80
  -2 -18   1   16.00    6.50
  -2 -18   1   19.40    4.70
  -2 -18   1   17.00    4.00
   2  18  -1   13.30    7.70
   2  18  -1   18.70    6.50
  -2  18   1   16.30    6.40
  -1 -18   1   45.20   14.20
  -1 -18   1   70.69    7.50
  -1 -18   1   69.79   11.10
   1 -18  -1   61.39    9.80
  -1 -18   1   72.69   10.00
   1 -18  -1   54.99    6.50
   1 -18  -1   66.79    7.00
  -1  18   1   71.59   13.70
  -1  18   1   50.29   10.40
   0 -18   1  162.08   10.50
   0 -18   1  200.68   15.80
   0 -18  -1  165.38   16.30
   0 -18  -1  203.48   16.30
   0 -18  -1  168.08   10.30
   0 -18   1  151.18   13.70
   0 -18  -1  173.98    9.40
   0  18   1  169.38   18.20
  -1 -18  -1  196.88   12.80
  -1 -18  -1  194.28   10.70
  -1 -18  -1  189.48   10.00
   1 -18   1  204.98   13.80
   1 -18   1  192.48   14.30
  -1  18  -1  189.28   10.90
   1  18   1  184.98   12.90
   1  18   1  185.48   13.60
   2 -18   1   74.69   10.90
   2 -18   1   49.70    9.40
   2 -18   1   77.89    9.40
  -2 -18  -1   62.89    6.40
   2 -18   1   74.09   12.50
  -2 -18  -1   70.69    7.60
  -2 -18  -1   72.99   10.00
   2  18   1   68.99    9.40
  -2  18  -1   39.80   10.00
  -2  18  -1   59.89    6.10
   2  18   1  109.09   18.20
   2  18   1   58.19    8.90
   2  18   1   86.09   10.30
   3 -18   1   26.90    6.40
  -3 -18  -1   29.40    7.50
   3 -18   1   21.90    5.60
  -3 -18  -1   19.90    4.90
   3 -18   1   28.20    6.40
   3 -18   1   24.70    7.10
   3 -18   1   23.20    7.90
   3  18   1   28.20    6.20
   3  18   1   19.10    6.10
   3  18   1   13.40    6.00
   3  18   1   33.60   11.80
  -3  18  -1   25.30    4.80
   4 -18   1  454.05   21.70
   4 -18   1  448.36   21.90
   4 -18   1  445.56   21.20
  -4 -18  -1  457.55   20.20
   4 -18   1  439.96   21.90
  -4 -18  -1  469.85   19.70
  -4  18  -1  460.85   18.80
   4  18   1  466.65   27.10
   4  18   1  467.75   21.70
   4  18   1  457.75   21.90
   4  18   1  474.05   21.20
   5 -18   1  118.59    9.80
   5 -18   1   95.99    9.10
   5 -18   1  106.79   10.50
   5 -18   1  109.59   10.30
  -5 -18  -1  115.39    8.20
  -5 -18  -1  115.59    9.70
  -5  18  -1  103.89    6.60
   5  18   1  108.39   14.30
   5  18   1  114.59   11.00
   5  18   1  114.29    8.90
   5  18   1   90.29   19.00
   6 -18   1  177.48   10.40
   6 -18   1  170.48    9.80
   6 -18   1  147.69   13.30
   6 -18   1  161.78   11.30
   6 -18   1  173.88   10.50
  -6 -18  -1  161.78    9.20
  -6 -18  -1  156.28    9.30
   6  18   1  165.68    9.70
   6  18   1  150.38   14.20
  -6  18  -1  155.38    7.90
  -7 -18  -1  118.09    7.30
   7 -18   1  112.49    7.50
  -7 -18  -1  119.89    7.00
   7 -18   1  123.59    7.30
  -7  18  -1  119.59    6.50
   7  18   1  117.19    7.20
   7  18   1  105.19    9.50
   8 -19  -1   22.00    3.30
  -7 -19   1   60.49    5.30
   7 -19  -1   64.89   10.30
  -7 -19   1   86.59    6.60
   7 -19  -1   68.19    6.40
   7 -19  -1   71.09    6.60
   7  19  -1   95.19   15.10
   7  19  -1   72.49   10.00
  -6 -19   1   84.79    7.20
   6 -19  -1   90.09    8.40
  -6 -19   1   91.39    7.00
   6 -19  -1   83.59    7.90
   6 -19  -1   92.09    8.80
   6  19  -1  107.49   13.20
   6  19  -1   90.89   12.30
  -6  19   1   64.49   10.50
   6  19  -1   91.89   12.90
   6  19  -1   91.79    7.90
   6  19  -1  106.69    8.80
   5 -19  -1  147.89   11.00
  -5 -19   1  150.58    9.40
  -5 -19   1  156.38    9.50
   5 -19  -1  163.48   12.80
   5  19  -1  127.79   20.90
   5  19  -1  159.88   13.10
  -5  19   1  134.29    8.40
   5  19  -1  139.19   11.40
   4 -19  -1  243.78   17.60
  -4 -19   1  282.67   19.40
  -4 -19   1  295.27   13.90
   4 -19  -1  281.07   15.60
   4 -19  -1  276.37   15.40
  -4 -19   1  278.97   13.70
  -4  19   1  253.77   17.80
   4  19  -1  266.77   16.30
   4  19  -1  280.67   15.60
  -4  19   1  263.07   12.70
   4  19  -1  299.57   19.50
   3 -19  -1   52.49    9.10
  -3 -19   1   39.80    6.90
   3 -19  -1   54.49   10.00
  -3 -19   1   52.19    7.10
   3 -19  -1   39.00    9.50
  -3 -19   1   38.90    7.70
   3  19  -1   42.00    8.40
   3  19  -1   33.60    7.70
   3  19  -1   37.60    6.90
  -3  19   1   41.70    8.00
   2 -19  -1   32.10    5.00
  -2 -19   1   21.20    4.60
   2 -19  -1   25.70    6.10
  -2 -19   1   37.90    7.10
   2 -19  -1   24.00    5.60
  -2 -19   1   22.40    4.40
   2  19  -1   25.10    7.70
  -2  19   1   20.50    6.20
   2  19  -1   29.30    6.70
   1 -19  -1  129.79   10.80
   1 -19  -1  118.39    8.30
   1 -19  -1  135.39   12.60
  -1 -19   1  110.89   11.60
  -1 -19   1  129.39    9.70
  -1 -19   1  122.29    8.80
   1  19  -1  134.29   13.30
   1  19  -1  135.29   12.40
  -1  19   1  114.09   15.10
   0 -19  -1   25.20    4.30
   0 -19   1   20.60    5.00
   0 -19  -1   22.90    3.90
   0 -19  -1   14.60    8.40
   0 -19  -1   23.50    5.40
   0 -19   1   28.50    8.30
   0 -19   1   32.30    6.70
   0  19   1   40.20    9.60
   0  19  -1   27.70    7.00
   0  19   1   15.50    7.10
   0  19   1   24.10    5.80
   0  19  -1   36.90    7.00
  -1 -19  -1   25.90    4.30
  -1 -19  -1   27.70    5.80
  -1 -19  -1   25.30    4.00
   1 -19   1   28.90    6.90
   1 -19   1   28.60    6.90
   1  19   1   25.90   10.10
   1  19   1   23.50    5.70
  -1  19  -1   16.70    7.70
  -1  19  -1   40.00    6.80
   1  19   1   25.00    6.30
   2 -19   1   60.79   10.70
   2 -19   1   53.29    8.40
  -2 -19  -1   56.79    7.80
   2 -19   1   55.49   10.70
   2 -19   1   53.29    8.80
  -2 -19  -1   66.99    7.40
   2  19   1   64.49    9.70
  -2  19  -1   69.19    6.20
  -2  19  -1   41.10    9.50
   2  19   1   60.69   10.00
   2  19   1   58.89    9.10
  -3 -19  -1   58.09   11.50
  -3 -19  -1   64.19    7.50
   3 -19   1   67.39    9.90
   3 -19   1   63.29   10.40
   3 -19   1   69.49   12.50
   3 -19   1   82.59   11.80
   3  19   1   54.39    9.80
  -3  19  -1   67.79    7.40
   3  19   1   68.89    9.70
   3  19   1   70.29   10.40
  -4 -19  -1  206.48   11.20
   4 -19   1  232.48   14.30
   4 -19   1  227.88   13.30
   4 -19   1  205.68   13.70
  -4 -19  -1  229.28   12.10
   4  19   1  203.38   13.40
   4  19   1  233.08   13.70
   4  19   1  212.38   13.00
  -4  19  -1  205.38   10.20
   4  19   1  227.48   22.40
   5 -19   1  120.59   10.40
   5 -19   1  132.59    9.20
  -5 -19  -1  127.19    8.50
   5 -19   1  115.59   10.20
  -5 -19  -1  119.99    8.10
   5  19   1  122.79   14.40
  -5  19  -1  114.69    6.90
   5  19   1  108.59   10.50
   5  19   1   97.19   19.60
   5  19   1  120.09    8.90
   6 -19   1   56.19    6.30
  -6 -19  -1   52.79    5.80
   6 -19   1   53.59   10.70
   6 -19   1   56.29    8.00
   6 -19   1   59.29    7.00
  -6 -19  -1   55.79    9.90
  -6  19  -1   47.80    4.80
   6  19   1   46.10    5.70
   6  19   1   35.70    6.80
  -7 -19  -1   71.19    5.50
   7 -19   1   77.39    6.20
   7  19   1   84.49    8.50
   7  19   1   81.39    5.70
   7 -20  -1   11.80    4.80
   7 -20  -1   11.00    3.40
   7 -20  -1    9.10    4.10
  -7 -20   1   13.90    5.20
   7  20  -1    4.90    6.70
   7  20  -1    4.20    6.20
  -6 -20   1   48.00    6.70
   6 -20  -1   39.50    7.20
  -6 -20   1   46.90    5.20
   6 -20  -1   63.09    7.90
   6 -20  -1   62.49    7.00
   6  20  -1   65.59   11.30
   6  20  -1   51.39   10.40
   6  20  -1   44.00    7.10
  -5 -20   1  123.29    7.90
  -5 -20   1   99.09    7.80
   5 -20  -1  116.69    9.60
   5 -20  -1   96.79    9.20
   5  20  -1  112.49    9.60
   5  20  -1  111.59    9.90
   5  20  -1  100.49   12.30
   5  20  -1  104.79   12.80
  -4 -20   1  739.63   30.20
  -4 -20   1  644.64   37.30
  -4 -20   1  736.63   30.20
   4 -20  -1  844.22   38.30
   4 -20  -1  758.32   31.60
   4 -20  -1  745.93   31.60
   4  20  -1  759.92   32.40
   4  20  -1  773.22   34.30
   4  20  -1  747.33   31.50
  -4  20   1  855.41   37.70
  -3 -20   1   75.99    7.50
   3 -20  -1   86.69   10.30
   3 -20  -1   69.09    9.60
  -3 -20   1   75.79    8.00
  -3 -20   1   72.59   12.00
   3  20  -1   82.39   10.80
   3  20  -1   60.89    9.00
  -3  20   1   86.49   11.00
   3  20  -1  105.59   14.10
  -2 -20   1   54.59    7.80
  -2 -20   1   49.00    7.00
  -2 -20   1   60.99   11.00
   2 -20  -1   58.89   10.10
  -2  20   1   81.39   14.60
   2  20  -1   59.49   10.80
  -1 -20   1  221.88   13.50
   1 -20  -1  229.88   15.20
   1 -20  -1  243.88   14.10
  -1 -20   1  235.18   12.10
   1 -20  -1  239.18   11.60
  -1 -20   1  277.77   15.60
   1 -20  -1  216.28   14.20
   1  20  -1  257.27   15.80
  -1  20   1  234.48   18.00
   1  20  -1  226.38   16.60
  -1  20   1  215.48   14.70
   0 -20  -1   39.50    6.10
   0 -20  -1   28.60    9.20
   0 -20  -1   34.80    6.20
   0 -20   1   51.19    8.20
   0 -20   1   41.70    7.80
   0 -20   1   44.80    8.70
   0  20  -1   47.50    7.90
   0  20  -1   54.09   11.20
   0  20   1   29.70    9.70
   0  20   1   40.00    6.50
  -1 -20  -1    6.20    5.30
  -1 -20  -1    3.90    3.80
   1 -20   1    2.70    6.50
   1 -20   1   -3.70    6.20
   1  20   1  -10.00    9.60
   1  20   1    6.20    6.60
  -1  20  -1   11.20    7.40
   1  20   1    7.20    5.30
  -1  20  -1    8.10    5.80
   2 -20   1   60.19   10.50
  -2 -20  -1   59.79   10.30
  -2 -20  -1   72.49    7.30
   2 -20   1   52.09    7.60
   2  20   1   60.99   10.00
  -2  20  -1   58.09    7.50
  -2  20  -1   77.09   15.10
   2  20   1   93.89   19.50
   2  20   1   84.49    9.90
  -3 -20  -1  106.79   11.60
  -3 -20  -1  104.09    7.60
   3 -20   1  121.79   13.70
   3 -20   1   92.99   11.20
   3 -20   1   92.59   12.30
   3 -20   1   93.19   10.50
  -3 -20  -1  107.29    8.00
   3  20   1   82.89   10.00
  -3  20  -1   77.29    6.90
   3  20   1   81.89   12.30
   3  20   1   98.09   10.10
   3  20   1  103.69   10.90
   4 -20   1   35.50    6.70
   4 -20   1   30.40    6.00
  -4 -20  -1   41.90    7.20
   4  20   1   31.00    5.60
   4  20   1   26.20   12.90
  -4  20  -1   41.10    5.30
   5 -20   1   23.20    5.10
  -5 -20  -1   20.60    3.90
   5 -20   1   34.00    6.60
   5 -20   1   17.60    4.90
  -5 -20  -1   16.30    3.50
   5  20   1   20.10    7.00
  -5  20  -1   20.10    3.20
   5  20   1   17.30    4.30
   5  20   1   26.40    6.70
  -6 -20  -1    6.60    3.40
   6 -20   1   11.50    4.40
  -6 -20  -1    7.60    2.90
   6  20   1   10.30    3.30
   6  20   1   11.20    5.50
  -6  20  -1    5.50    3.20
  -7 -20  -1  207.78    8.50
   7 -20   1  180.28    9.30
   7  20   1  181.18   10.00
  -7 -21   1    9.40    2.50
   7 -21  -1    2.00    3.50
   7  21  -1    9.00    5.00
  -6 -21   1    5.30    4.10
   6 -21  -1    3.70    4.00
  -6 -21   1    2.50    2.80
   6 -21  -1    6.70    4.10
   6 -21  -1    4.50    4.00
   6  21  -1    5.30    5.30
  -5 -21   1  188.48    9.50
   5 -21  -1  159.78   11.10
  -5 -21   1  169.08   10.20
   5 -21  -1  195.98   11.20
   5 -21  -1  205.18   12.20
   5  21  -1  172.98   13.90
   5  21  -1  191.28   14.70
   5  21  -1  178.68   14.00
   4 -21  -1   23.60    6.70
  -4 -21   1   23.90    4.40
   4 -21  -1   20.80    6.20
   4 -21  -1   18.90    6.90
  -4 -21   1   27.80    8.30
   4 -21  -1   13.20    6.90
   4  21  -1   15.20    6.20
  -4  21   1   26.10    7.40
   4  21  -1   23.30    7.60
  -3 -21   1  264.27   13.80
  -3 -21   1  277.17   13.40
   3 -21  -1  280.67   16.10
   3 -21  -1  281.77   15.50
  -3 -21   1  280.97   16.90
   3  21  -1  288.27   18.40
   3  21  -1  284.87   16.30
  -3  21   1  276.17   16.60
  -3  21   1  318.07   17.10
  -2 -21   1    0.30    6.10
   2 -21  -1    7.60    5.30
   2 -21  -1    0.70    5.60
  -2 -21   1   -5.10    4.90
  -2 -21   1    6.80    3.80
   2  21  -1   10.00    5.70
  -2  21   1    7.20    5.60
  -2  21   1    2.90    7.40
   2  21  -1    4.40    6.80
   1 -21  -1   37.20    7.40
  -1 -21   1   37.00    6.80
   1 -21  -1   38.10    6.60
  -1 -21   1   49.10    7.00
   1 -21  -1   27.20    5.90
   1  21  -1   26.60    7.00
  -1  21   1   49.00    9.10
  -1  21   1   39.60    8.70
   1  21  -1   34.90    7.10
   0 -21  -1   95.49   16.40
   0 -21  -1   79.19    7.10
   0 -21   1   89.59   11.20
   0 -21   1   72.79   14.20
   0 -21  -1   84.79   10.00
   0 -21  -1   92.69    8.60
   0  21   1   82.39   16.30
   0  21  -1   87.99   11.60
   0  21  -1   72.69   11.80
   0  21   1   83.39   10.20
  -1 -21  -1  108.39    8.10
   1 -21   1  111.29   11.50
   1 -21   1   94.49   12.30
  -1 -21  -1   98.99   10.70
  -1 -21  -1   94.19    7.60
   1  21   1   93.59   17.60
  -1  21  -1  103.49   11.40
   1  21   1   96.09   10.30
  -1  21  -1   83.79   12.40
  -2 -21  -1  132.99   11.30
  -2 -21  -1  139.09    8.60
   2 -21   1  119.89   11.70
  -2 -21  -1  131.69    8.70
   2 -21   1  138.09   11.80
   2  21   1  174.88   21.10
   2  21   1  132.49   10.90
  -2  21  -1  111.19   15.30
   3 -21   1  128.19   15.60
   3 -21   1  105.89   10.50
  -3 -21  -1  103.89    7.80
   3 -21   1   87.39   17.30
  -3 -21  -1  112.09    7.90
   3  21   1  127.49   10.00
  -3  21  -1   86.09    7.80
   3  21   1   95.49   11.20
   4 -21   1  109.79    9.30
  -4 -21  -1   97.59    7.40
   4 -21   1  106.79   13.80
  -4 -21  -1  101.59    7.50
   4 -21   1  101.39    9.40
  -4  21  -1   94.19    7.30
   4  21   1  111.49    9.20
   4  21   1  103.89    9.20
   4  21   1  108.09   12.70
  -5 -21  -1   74.89    7.10
   5 -21   1   64.59    8.30
  -5 -21  -1   69.59    5.90
   5 -21   1   62.39    7.70
   5  21   1   72.09    6.80
  -5  21  -1   51.19    6.70
   5  21   1   85.79   11.20
  -6 -21  -1   82.69    6.40
   6 -21   1   75.19    7.80
   6 -21   1   77.79    7.00
   6  21   1   84.09    6.20
   6  21   1   77.89   11.00
  -6 -22   1   84.49    8.50
   6 -22  -1   77.69    7.60
   6  22  -1   67.59   11.80
   6  22  -1   70.79   11.50
  -5 -22   1   42.10    4.90
   5 -22  -1   34.70    5.10
  -5 -22   1   52.89    7.90
   5 -22  -1   40.50    5.90
   5 -22  -1   49.50    9.40
   5  22  -1   37.80    7.50
   5  22  -1   44.90    9.80
  -5  22   1   47.10    7.50
   5  22  -1   38.60    5.20
   4 -22  -1   27.10    5.20
   4 -22  -1   21.50    7.10
  -4 -22   1   21.70    8.10
  -4 -22   1   31.60    5.10
  -4 -22   1   33.30    5.40
   4 -22  -1   36.00    7.30
   4  22  -1   32.50    5.60
  -4  22   1   27.80    7.30
   3 -22  -1   17.60    5.70
  -3 -22   1   12.30    6.40
  -3 -22   1    9.10    5.00
  -3  22   1   16.00    5.80
   3  22  -1   16.40    7.40
  -3  22   1    6.80    7.30
   3  22  -1   25.30    7.80
  -2 -22   1   50.69    6.50
  -2 -22   1   46.20    7.10
   2 -22  -1   52.19    9.40
   2 -22  -1   50.29    7.10
  -2  22   1   51.69   10.00
   2  22  -1   57.59   12.10
   2  22  -1   60.29    9.80
   1 -22  -1   30.80    6.90
  -1 -22   1   28.40    6.30
  -1 -22   1   27.20    5.10
   1 -22  -1   43.80    7.10
   1 -22  -1   37.10    6.60
  -1  22   1   33.60    9.20
   1  22  -1   32.60    7.40
  -1  22   1   24.10    5.80
   1  22  -1   29.20    6.60
   0 -22  -1   86.99   11.30
   0 -22  -1   98.59   10.20
   0 -22  -1  100.39    9.90
   0 -22   1  102.79   11.50
   0 -22  -1   81.29    7.30
   0 -22   1   97.89   13.80
   0  22   1   77.49   16.80
   0  22  -1  112.39   12.10
   0  22   1   85.19    9.90
   0  22  -1   88.59   11.60
   1 -22   1   11.70    6.20
  -1 -22  -1    9.40    3.50
   1 -22   1    4.30    5.50
  -1 -22  -1    3.30    4.10
  -1 -22  -1   11.10    5.50
  -1  22  -1    8.70    6.80
   1  22   1    9.10    5.00
  -1  22  -1    3.00    5.40
   2 -22   1   79.09   10.40
   2 -22   1   77.89   10.70
  -2 -22  -1   91.59    7.60
  -2 -22  -1   86.79    7.30
  -2 -22  -1   98.09   10.90
  -2  22  -1   80.29   12.70
   2  22   1  107.99    9.60
  -2  22  -1  101.99   11.30
  -3 -22  -1   54.79    6.70
   3 -22   1   67.09   11.10
   3 -22   1   61.89    8.60
  -3 -22  -1   62.19    6.40
  -3 -22  -1   68.29   10.40
  -3  22  -1   51.49    8.50
   3  22   1   59.79    8.00
   3  22   1   56.59    9.80
  -4 -22  -1   83.29    6.40
   4 -22   1   82.19    8.20
  -4 -22  -1   87.09    6.90
   4  22   1   89.39   11.30
  -5 -22  -1    9.40    3.50
  -5 -22  -1    5.30    2.80
   5 -22   1    7.50    3.70
   5 -22   1    5.00    5.20
   5 -22   1    6.30    4.40
   5  22   1    7.40    5.40
   5  22   1    1.10    5.30
  -6 -22  -1   15.80    2.70
   6  22   1   20.60    4.90
   6 -23  -1   12.00    3.70
   6  23  -1   13.80    5.20
   5 -23  -1   86.09    7.50
   5 -23  -1   67.99   10.30
  -5 -23   1   80.09    5.50
   5  23  -1   76.49   11.80
   5  23  -1   74.79    9.20
   5  23  -1   85.09    7.60
  -4 -23   1   52.99    5.30
  -4 -23   1   37.90    8.80
  -4  23   1   44.00    8.30
  -4  23   1   63.49   11.50
   4  23  -1   37.10    7.50
   4  23  -1   48.70    6.90
  -3 -23   1   26.80    6.40
   3 -23  -1   20.80    5.60
   3 -23  -1   26.30    5.30
  -3 -23   1   31.70    5.60
   3  23  -1   13.00    7.30
  -3  23   1   27.50    6.10
   3  23  -1   26.30    5.30
  -3  23   1   16.70    7.50
   2 -23  -1  119.29   10.70
  -2 -23   1  104.99   10.20
  -2 -23   1  120.09    7.80
   2 -23  -1   96.69   10.20
  -2  23   1  107.49   10.50
   2  23  -1  102.29   11.20
   2  23  -1   86.89   12.70
  -2  23   1  116.89   15.00
   1 -23  -1   18.50    5.80
  -1 -23   1   15.30    6.20
   1 -23  -1   10.40    6.60
  -1  23   1   35.40   10.10
   1  23  -1   16.90    7.20
   1  23  -1   14.50    7.50
   0 -23  -1  103.99    8.30
   0 -23  -1  119.89   10.40
   0 -23   1  123.89   11.20
   0 -23   1  121.49   14.60
   0  23   1  119.99   12.10
  -1 -23  -1  161.98   15.90
   1 -23   1  174.68   13.20
   1 -23   1  150.78   17.10
  -1 -23  -1  193.48   11.30
  -1 -23  -1  219.28   10.80
  -1  23  -1  173.68   13.30
  -1  23  -1  208.98   14.40
  -2 -23  -1  269.47   12.40
  -2 -23  -1  246.28   12.80
   2 -23   1  263.87   14.70
  -2 -23  -1  298.47   15.00
   2 -23   1  262.37   15.00
   2  23   1  264.87   14.10
  -2  23  -1  251.47   18.00
  -2  23  -1  255.77   14.80
   3 -23   1   40.80    7.50
  -3 -23  -1   41.30    6.70
  -3 -23  -1   42.50    6.60
  -3 -23  -1   49.30    5.40
   3 -23   1   52.59    9.90
   3  23   1   41.60    7.80
  -3  23  -1   56.89    8.30
   4 -23   1   34.80    6.80
  -4 -23  -1   48.80    6.30
  -4 -23  -1   40.10    4.80
   4  23   1   39.90    9.40
  -4  23  -1   47.00    7.40
   4  23   1   39.90    7.30
  -5 -23  -1    3.90    2.80
   5 -23   1    1.60    4.40
   5 -23   1    4.60    4.20
  -5  23  -1    0.20    3.80
   5  23   1   -2.40    5.30
   5 -24  -1   31.80    6.20
   5  24  -1   27.00    4.10
   5  24  -1   40.00    7.70
   4 -24  -1   23.20    4.40
   4  24  -1   24.00    8.60
   4  24  -1   11.30    4.00
   4  24  -1   14.00    5.10
  -4  24   1   16.80    6.80
   3 -24  -1   22.80    5.40
  -3 -24   1   37.30    5.90
  -3 -24   1   19.40    5.70
   3 -24  -1   20.30    4.90
  -3  24   1   25.80    5.90
   3  24  -1   19.30    6.80
   3  24  -1   24.80    4.80
   2 -24  -1    2.40    5.10
  -2 -24   1   10.40    5.10
   2 -24  -1   -1.50    4.70
   2  24  -1   12.80    6.70
   2  24  -1   -4.70    4.40
  -2  24   1    7.90    4.90
   1 -24  -1   18.90    6.90
  -1 -24   1   19.10    5.20
   1 -24  -1   27.90    5.50
  -1  24   1   10.50    5.10
   1  24  -1   18.10    5.50
   1  24  -1   12.20    6.50
   0 -24  -1   32.60    5.70
   0 -24   1   17.50    5.00
   0 -24   1   37.30    8.70
   0 -24  -1   19.30    5.00
   0  24   1   29.50    5.50
   0  24  -1   31.30    6.10
   0  24  -1   31.70    6.60
  -1 -24  -1   10.70    5.00
  -1 -24  -1   10.00    3.60
   1 -24   1   16.20    5.80
   1 -24   1    8.30    4.80
  -1  24  -1    7.50    6.00
   1  24   1    3.50    4.10
  -1  24  -1   13.30    5.50
  -2 -24  -1   -3.80    4.90
  -2 -24  -1    2.00    4.90
   2 -24   1   -2.60    4.90
   2 -24   1   -1.20    5.00
  -2 -24  -1   -3.10    4.80
   2  24   1    1.10    3.90
  -2  24  -1    2.70    7.20
  -2  24  -1   -4.10    4.70
  -3 -24  -1   50.19    8.00
   3 -24   1   38.80    7.50
   3 -24   1   44.80    7.20
  -3 -24  -1   53.29    5.00
  -3 -24  -1   53.39   10.10
  -3  24  -1   53.09    8.20
   3  24   1   47.80    9.50
   3  24   1   43.10    6.50
   4 -24   1   47.30    6.70
  -4 -24  -1   38.80    4.10
  -4  24  -1   59.99    7.80
   4  24   1   58.39    8.90
  -5 -24  -1   38.00    4.90
   5 -24   1   38.00    6.20
   5  24   1   41.40    7.40
   5 -25  -1   18.20    3.70
   5  25  -1    1.20    5.00
   4 -25  -1   20.20    5.30
  -4  25   1   18.50    9.50
   4  25  -1   18.90    6.40
   4  25  -1   17.50    5.70
   3 -25  -1   26.40    4.80
   3 -25  -1   24.80    7.90
  -3 -25   1   28.40    7.00
   3  25  -1   16.00    4.20
  -3  25   1   27.60    7.00
   3  25  -1   16.40    7.50
   2 -25  -1   57.59    7.30
   2 -25  -1   39.10    6.00
  -2 -25   1   39.80    5.90
   2  25  -1   48.50    7.20
  -2  25   1   44.10    7.70
   2  25  -1   31.60    7.10
   1 -25  -1   76.09    8.00
  -1 -25   1   64.79    7.70
   1 -25  -1   43.80    8.30
  -1  25   1   69.09    7.90
   1  25  -1   56.39    8.30
   1  25  -1   61.79   11.50
   0 -25   1  163.78   10.70
   0 -25  -1  161.28   10.50
   0  25  -1  147.79   11.50
   0  25  -1  155.28   12.60
   0  25   1  176.18   10.30
  -1 -25  -1  123.29    9.20
  -1 -25  -1  109.39   10.90
   1 -25   1  109.09    9.20
   1 -25   1  115.59   11.10
  -1  25  -1  132.69   11.40
  -1  25  -1  123.09   11.40
   1  25   1  121.69    8.70
   2 -25   1   46.20    7.90
   2 -25   1   45.90    8.00
  -2 -25  -1   43.30    5.70
  -2 -25  -1   48.10    6.00
  -2  25  -1   66.19   11.20
   2  25   1   40.50    6.10
   3 -25   1   93.19    8.00
  -3 -25  -1   87.29    7.20
  -3 -25  -1   64.49   11.40
   3 -25   1   80.49   13.40
   3  25   1   72.99    9.60
  -3  25  -1   96.59    8.60
   4 -25   1   48.20    6.10
  -4 -25  -1   46.30    7.00
   4 -25   1   41.20    6.40
   4  25   1   33.10    6.00
   4 -26  -1   75.39    7.40
   4  26  -1   76.29    7.60
  -3 -26   1   53.89    8.80
   3 -26  -1   40.20    6.30
  -3  26   1   49.99    6.20
   2 -26  -1  178.38   11.90
   2 -26  -1  177.58   10.60
  -2 -26   1  187.68   10.70
   2  26  -1  193.98   14.40
  -2  26   1  195.08   11.20
   2  26  -1  194.48   10.40
  -1 -26   1   96.49    8.20
   1 -26  -1  104.19    8.10
  -1  26   1  122.09    8.10
   1  26  -1  113.69   12.50
   1  26  -1  108.29    8.80
   0 -26   1   12.00    4.10
   0 -26  -1   18.80    4.20
   0  26  -1   17.30    5.00
   0  26   1   11.60    3.90
   0  26  -1    4.20    7.50
   1 -26   1   50.89    7.70
  -1 -26  -1   76.49    6.90
   1 -26   1   64.89    7.50
  -1  26  -1   61.59   10.00
   1  26   1   65.49    6.60
   2 -26   1   85.79    8.40
  -2 -26  -1   90.99    8.20
   2 -26   1   83.19    8.80
   2  26   1   85.79    8.20
  -2  26  -1   77.69   10.20
   2  26   1   87.59   12.30
  -2  26  -1   68.99   12.60
   3 -26   1   23.60    4.40
   3  27  -1   10.60    4.20
   3  27  -1    7.10    5.20
  -2 -27   1   32.30    5.50
   2 -27  -1   36.20    6.40
   2  27  -1   44.90    5.90
  -2  27   1   37.60    5.80
  -1 -27   1    2.10    3.90
   1 -27  -1    4.30    3.30
   1  27  -1    1.60    3.90
  -1  27   1    2.70    3.70
   0 -27   1   75.69    9.20
   0  27  -1  107.19    8.40
   0  27   1   98.89    9.70
   1 -27   1    4.90    3.90
  -1 -27  -1    4.30    3.80
   1  27   1    8.60    3.50
  -1  27  -1   -2.80    5.50
   2  27   1   38.60    9.40
  -1 -28   1   47.10    7.60
  -1  28   1   49.10    6.50
   1  28  -1   42.50    5.70
   0 -28  -1   54.69    5.80
   0 -28   1   49.50    6.50
   0  28   1   58.69    5.50
 -10   0   2   17.50    3.20
  10   0  -2   20.60    4.50
 -10   0   2   18.60    3.00
  10   0  -2   19.10    4.50
   9   0  -2   26.90    6.60
  -9   0   2   16.50    3.20
   9   0  -2   16.80    4.50
   9   0  -2   22.00    6.30
   9   0  -2   22.80    5.30
  -9   0   2   23.60    4.70
   8   0  -2   30.40    8.30
   8   0  -2   28.90    7.40
   8   0  -2   46.90    7.00
  -8   0   2   27.20    4.90
   8   0  -2   33.30    6.60
  -8   0   2   31.40    5.70
   8   0  -2   22.50    7.00
  -7   0   2  246.48   14.50
   7   0  -2  258.37   18.70
   7   0  -2  239.08   18.90
   7   0  -2  245.28   16.40
   7   0  -2  252.87   14.00
  -7   0   2  276.77   12.70
   7   0  -2  266.57   15.80
   7   0  -2  261.67   17.00
   6   0  -2  142.29   15.40
  -6   0   2  201.08   29.40
   6   0  -2  165.98   11.70
   6   0  -2  176.88   13.90
  -5   0   2   -9.90   13.10
  -5   0   2  -14.00   13.20
  -5   0   2    2.10    2.90
  -4   0   2    5.90    8.90
  -4   0   2   -0.10    7.40
   4   0  -2    9.00    4.50
  -3   0   2 1376.56   56.39
   3   0  -2 1409.66   54.69
   3   0  -2 1327.57   58.29
  -3   0   2 1429.66   55.59
   3   0  -2 1332.77   57.49
  -2   0   2  768.72   31.90
  -2   0   2  737.73   30.40
   2   0  -2  746.53   32.70
   2   0  -2  723.03   32.30
   1   0  -2  743.23   28.70
  -1   0   2  734.13   28.60
   1   0  -2  714.23   30.10
  -1   0   2  775.22   30.00
   1   0  -2  709.83   32.00
   0   0  -2 2931.31  108.89
   0   0  -2 2742.83  112.49
   0   0  -2 3253.37  108.39
  -1   0  -2  332.47   18.60
  -1   0  -2  338.87   17.20
  -2   0  -2  347.27   19.40
  -2   0  -2  325.97   19.20
  -3   0  -2   12.30    6.90
  -3   0  -2   13.50   10.40
  -4   0  -2   19.50   21.60
  -4   0  -2    3.30   17.50
   5   0   2  740.83   32.00
   5   0   2  710.73   31.20
   5   0   2  711.33   30.60
   5   0   2  688.53   32.40
   6   0   2   33.90    7.10
   6   0   2   29.70    7.50
   6   0   2   22.90    6.80
   7   0   2   81.79   11.10
   7   0   2   89.59   10.10
   7   0   2   84.89   11.00
  -8   0  -2   20.80    4.10
   8   0   2   12.90    7.70
   8   0   2    8.90    6.60
   9   0   2  148.89    9.20
  -9   0  -2  126.49    8.80
   9   0   2  162.68    8.70
  10  -1  -2    8.20    3.90
 -10  -1   2   13.50    2.70
 -10  -1   2   10.80    3.00
  10  -1  -2   12.30    4.00
  10   1  -2   16.70    4.50
  10   1  -2   15.30    4.30
 -10   1   2   14.00    3.00
 -10   1   2   16.70    2.80
   9  -1  -2  950.90   39.70
  -9  -1   2  892.91   37.00
  -9  -1   2  857.11   34.20
   9  -1  -2  853.11   34.10
   9  -1  -2  891.91   35.80
   9  -1  -2  873.41   36.70
  -9   1   2  942.71   35.30
  -9   1   2  847.02   34.00
   9   1  -2  866.71   33.80
   9   1  -2  897.51   36.20
   9   1  -2  868.41   37.00
   9   1  -2  842.62   36.90
  -8  -1   2  113.59    8.40
   8  -1  -2  124.59   14.00
   8  -1  -2  110.19   12.90
   8  -1  -2  111.79   14.40
   8  -1  -2  119.09    9.00
  -8  -1   2  123.39    9.30
   8  -1  -2  126.19   12.20
   8  -1  -2  120.59   10.90
   8   1  -2  136.19   13.20
   8   1  -2  116.79   11.30
  -8   1   2  121.69    9.00
   8   1  -2  115.39    9.10
   8   1  -2  115.89   12.30
  -8   1   2  115.79    8.00
   8   1  -2  114.89   14.10
   7  -1  -2   85.69   14.50
  -7  -1   2   72.29    9.70
   7  -1  -2   62.89   10.90
  -7  -1   2   83.79    7.00
   7  -1  -2   66.49    9.20
   7  -1  -2   79.69    8.70
   7  -1  -2   66.79   11.50
   7  -1  -2   78.89   11.70
   7   1  -2   73.39    9.00
   7   1  -2   73.09   15.20
   7   1  -2   77.29   12.50
   7   1  -2   82.09   11.60
  -7   1   2   78.09    6.90
   7   1  -2   53.89   10.80
  -7   1   2   75.69    9.20
   6  -1  -2  244.18   15.60
   6  -1  -2  219.78   16.90
  -6  -1   2  264.07   41.00
   6  -1  -2  235.28   20.00
   6  -1  -2  236.28   17.20
   6  -1  -2  245.18   14.10
   6   1  -2  236.68   14.70
   6   1  -2  270.27   16.50
   6   1  -2  242.18   17.50
  -6   1   2  250.97   42.40
  -6   1   2  254.27   17.60
  -5  -1   2  387.86   30.50
  -5  -1   2  331.17   28.20
  -5  -1   2  351.76   15.60
  -5   1   2  363.26   30.60
  -5   1   2  364.76   15.60
  -5   1   2  397.36   31.70
   4  -1  -2   57.49    7.40
  -4  -1   2   49.30   10.90
  -4  -1   2   41.90   10.30
  -4   1   2   58.29   11.50
  -4   1   2   52.29   11.00
   3  -1  -2  458.35   25.80
   3  -1  -2  448.66   27.10
  -3  -1   2  454.35   22.50
   3  -1  -2  445.06   22.00
  -3  -1   2  418.96   22.90
   3   1  -2  433.56   27.50
   3   1  -2  422.56   25.60
  -3   1   2  475.25   24.00
   3   1  -2  483.75   21.90
  -3   1   2  456.85   22.80
   2  -1  -2 2668.13  100.89
   2  -1  -2 2573.14   99.59
  -2  -1   2 2665.63  100.29
  -2  -1   2 2728.33   99.19
   2  -1  -2 2590.34  101.19
   2   1  -2 2659.83  101.19
  -2   1   2 2670.13  100.59
   2   1  -2 2713.73  101.09
  -2   1   2 2723.03   99.19
   2   1  -2 2580.74   99.99
   1  -1  -2 1924.51   73.89
  -1  -1   2 1998.80   75.39
  -1  -1   2 1736.43   77.49
   1  -1  -2 1924.11   75.39
  -1  -1   2 2215.28   74.49
   1   1  -2 1942.71   77.59
  -1   1   2 2021.00   75.59
  -1   1   2 2148.78   74.99
  -1   1   2 2212.28   73.79
   1   1  -2 1909.31   75.69
   1   1  -2 2029.20   74.69
   0  -1  -2 1662.43   55.69
   0  -1   2 1259.97   58.69
   0  -1  -2 1507.75   55.09
   0  -1   2 1568.84   54.99
   0   1  -2 1471.95   55.49
   0   1  -2 1589.14   53.99
   0   1  -2 1429.96   58.89
   0   1   2 1344.77   55.69
  -1  -1  -2  511.25   25.30
  -1  -1  -2  524.25   23.80
  -1  -1  -2  526.35   22.10
  -1   1  -2  486.65   24.50
  -2  -1  -2 1334.57   52.09
  -2  -1  -2 1251.57   54.99
  -2  -1  -2 1229.38   52.69
  -2   1  -2 1278.67   51.89
  -3  -1  -2  197.48   18.90
  -3  -1  -2  190.58   24.00
  -3  -1  -2  190.18   16.20
  -3   1  -2  207.48   13.70
  -3   1  -2  185.88   19.90
  -4  -1  -2  496.05   37.90
  -4  -1  -2  498.65   48.50
  -4   1  -2  543.05   38.70
   5  -1   2  572.64   25.30
   5  -1   2  535.85   31.40
   5  -1   2  529.25   26.90
   5  -1   2  545.15   25.50
   5   1   2  579.54   27.40
   5   1   2  583.74   26.20
   5   1   2  557.84   27.80
   5   1   2  577.34   26.50
   6  -1   2  314.27   19.60
   6  -1   2  294.27   17.70
   6  -1   2  284.77   18.90
   6   1   2  306.27   18.60
   6   1   2  310.37   18.50
   6   1   2  319.77   17.60
   7  -1   2   52.59    9.60
   7  -1   2   61.99   10.20
   7  -1   2   52.29    9.10
   7   1   2   56.19   10.90
   7   1   2   47.70   10.30
   7   1   2   39.30    7.30
  -8  -1  -2   94.89    8.10
   8  -1   2   59.09   11.60
  -8   1  -2   79.89    7.30
   9  -1   2  187.08    9.90
  -9  -1  -2  183.58   10.20
   9  -1   2  191.28   10.30
   9   1   2  191.98   10.80
  -9   1  -2  190.18    9.90
   9   1   2  192.98   10.40
  10  -2  -2   16.70    4.00
 -10  -2   2   28.40    4.40
  10  -2  -2   22.20    4.30
 -10  -2   2   25.70    3.80
  10   2  -2   30.60    4.90
 -10   2   2   23.30    3.50
  10   2  -2   21.70    4.70
 -10   2   2   28.10    4.00
  10   2  -2   27.60    9.00
   9  -2  -2   45.40    6.90
  -9  -2   2   54.19    5.90
   9  -2  -2   46.70    8.00
   9   2  -2   53.59   11.10
   9   2  -2   40.50    7.60
  -9   2   2   40.30    5.00
   9   2  -2   48.40    6.50
  -8  -2   2  132.89   10.10
   8  -2  -2  140.69   14.30
   8  -2  -2  147.89    9.50
   8  -2  -2  114.99   13.00
   8  -2  -2  139.29   13.70
   8  -2  -2  146.09   11.50
  -8  -2   2  133.49    8.90
   8   2  -2  133.49   13.30
   8   2  -2  139.39   10.20
   8   2  -2  140.19   12.60
   8   2  -2  136.49   13.10
  -8   2   2  134.19    9.30
  -8   2   2  142.39    8.50
   8   2  -2  134.99   14.40
   7  -2  -2   14.60    8.30
   7  -2  -2   11.00    4.60
   7  -2  -2   16.30    7.50
  -7  -2   2   24.60    5.60
   7  -2  -2    7.60    7.30
  -7  -2   2   11.50    3.60
   7  -2  -2   17.10    7.20
   7  -2  -2   19.20    7.30
   7   2  -2   13.30    9.00
  -7   2   2   15.30    3.60
   7   2  -2    8.50    6.60
   7   2  -2    8.70    9.20
   7   2  -2   15.70    5.30
  -7   2   2    1.30    4.70
   7   2  -2    5.10    7.10
   7   2  -2   13.30    7.00
  -6  -2   2  643.04   50.89
   6  -2  -2  654.23   28.00
   6  -2  -2  680.43   28.80
  -6  -2   2  637.04   31.10
   6  -2  -2  664.43   28.90
   6  -2  -2  678.03   30.20
   6  -2  -2  654.03   30.40
   6   2  -2  665.63   30.90
   6   2  -2  782.32   33.80
  -6   2   2  695.53   26.60
   6   2  -2  571.14   37.50
  -6   2   2  602.04   54.39
  -6   2   2  622.64   28.00
   6   2  -2  654.03   28.50
   6   2  -2  674.73   29.80
  -5  -2   2  165.28   21.80
  -5  -2   2  179.18   23.30
  -5  -2   2  143.99    8.60
  -5   2   2  143.69   21.10
  -5   2   2  148.39    8.20
  -5   2   2  148.89   21.10
   4  -2  -2   88.69    9.10
  -4  -2   2   78.79   14.10
   4  -2  -2   79.79   11.20
  -4  -2   2   93.19   14.70
  -4   2   2   88.09   13.30
   4   2  -2  111.89   10.60
  -4   2   2   86.39   15.40
   3  -2  -2 1362.46   56.09
   3  -2  -2 1317.67   57.59
  -3  -2   2 1613.54   57.49
  -3  -2   2 1352.96   55.79
   3  -2  -2 1355.36   58.99
   3   2  -2 1496.35   55.69
  -3   2   2 1406.66   56.39
   3   2  -2 1282.57   59.39
  -3   2   2 1464.25   57.79
   3   2  -2 1250.57   58.09
   2  -2  -2 4098.19  155.68
  -2  -2   2 4344.67  154.38
  -2  -2   2 4158.88  155.28
  -2  -2   2 3792.82  156.68
   2  -2  -2 4258.77  154.78
   2   2  -2 4227.48  156.48
  -2   2   2 3907.51  156.48
   2   2  -2 4195.48  155.48
  -2   2   2 4401.76  156.08
  -2   2   2 4360.46  154.28
   2   2  -2 4347.47  156.38
  -1  -2   2 2713.53   97.89
   1  -2  -2 2473.35   99.19
  -1  -2   2 2710.03   99.09
   1  -2  -2 2544.85   97.29
   1  -2  -2 2624.64   99.29
  -1  -2   2 2796.52   98.49
  -1  -2   2 2370.36  101.79
  -1   2   2 2675.23   99.49
  -1   2   2 2825.32   97.19
   1   2  -2 2612.44   99.79
   1   2  -2 2757.12   98.89
  -1   2   2 2924.81   99.59
   1   2  -2 2617.74  101.49
   0  -2   2 8088.89  276.07
   0  -2  -2 7652.73  274.67
   0  -2   2 6813.72  280.17
   0  -2  -2 7707.13  275.87
   0  -2  -2 8044.20  277.37
   0   2  -2 7467.55  279.87
   0   2  -2 7812.82  276.67
   0   2  -2 7557.84  275.07
   0   2   2 7425.76  277.67
   0   2   2 7718.03  276.37
  -1  -2  -2 2513.45   93.29
  -1  -2  -2 2564.64   96.09
   1  -2   2 2231.38   97.09
  -1   2  -2 2469.85   96.39
  -1   2  -2 2674.33   92.09
  -1   2  -2 2632.74   92.29
  -2  -2  -2  988.20   40.80
  -2  -2  -2  940.71   44.30
  -2   2  -2  950.70   41.00
  -2   2  -2  964.00   37.50
  -2   2  -2 1018.70   37.20
  -3  -2  -2 1069.59   54.49
  -3  -2  -2 1042.40   47.00
  -3  -2  -2 1026.60   48.10
  -3   2  -2 1139.49   42.20
  -3   2  -2 1165.18   44.10
  -3   2  -2 1069.19   50.89
  -4  -2  -2   63.09   18.30
  -4  -2  -2   77.59   24.60
  -4   2  -2   50.09   20.50
   5  -2   2  271.37   14.90
   5  -2   2  255.47   17.30
   5  -2   2  224.48   16.60
   5  -2   2  247.28   15.00
   5   2   2  207.58   16.50
   5   2   2  248.18   19.10
   5   2   2  215.98   15.30
   5   2   2  213.88   17.90
   5   2   2  235.78   16.00
   6  -2   2  276.37   17.20
   6  -2   2  270.27   17.80
   6  -2   2  265.57   15.90
   6   2   2  261.57   17.80
   6   2   2  304.07   17.60
   6   2   2  281.57   16.80
   7  -2   2  253.87   14.10
  -7  -2  -2  212.08   16.30
   7  -2   2  224.28   14.70
   7  -2   2  232.88   15.20
   7   2   2  216.48   15.40
   7   2   2  217.58   16.50
   7   2   2  236.48   15.30
  -7   2  -2  250.77   16.40
   8  -2   2   10.60    5.30
  -8  -2  -2   10.10    4.50
   8  -2   2   23.60    6.40
   8   2   2   20.00    5.90
   8   2   2   19.60    8.00
  -8   2  -2   20.30    3.90
   9  -2   2  179.48    9.30
  -9  -2  -2  162.98    9.90
   9  -2   2  178.08    9.70
   9   2   2  183.08   10.40
  -9   2  -2  150.48    9.10
   9   2   2  169.88    9.50
 -10  -3   2   47.70    4.80
  10  -3  -2   52.29    6.10
 -10  -3   2   54.49    4.70
  10  -3  -2   49.50    6.70
 -10   3   2   52.99    4.50
  10   3  -2   50.49    7.80
  10   3  -2   51.69    7.70
 -10   3   2   46.30    3.90
  10   3  -2   62.59    7.70
  -9  -3   2  244.58   14.80
   9  -3  -2  210.68   15.20
  -9  -3   2  237.98   11.80
   9  -3  -2  235.78   14.50
   9  -3  -2  267.37   14.50
   9  -3  -2  238.38   14.70
   9   3  -2  236.58   16.30
   9   3  -2  242.18   11.70
   9   3  -2  238.78   16.50
   9   3  -2  273.67   19.90
  -9   3   2  225.18   11.10
  -8  -3   2  302.67   14.20
   8  -3  -2  289.47   17.60
   8  -3  -2  302.77   18.30
  -8  -3   2  299.67   15.30
   8  -3  -2  309.97   17.40
   8  -3  -2  299.77   14.40
   8  -3  -2  311.27   16.30
   8   3  -2  298.77   18.40
  -8   3   2  285.87   14.20
   8   3  -2  290.97   17.80
   8   3  -2  229.28   29.60
   8   3  -2  304.67   17.30
   8   3  -2  283.57   18.00
  -8   3   2  301.17   13.70
   7  -3  -2   13.40    7.10
   7  -3  -2   19.00    7.80
   7  -3  -2   21.40    7.50
  -7  -3   2   20.70    4.10
  -7  -3   2   17.70    5.90
   7   3  -2   16.30    9.10
  -7   3   2   24.50    5.40
   7   3  -2   17.00    6.30
  -7   3   2   17.70    3.40
   7   3  -2   18.10    6.60
   7   3  -2   32.80    9.50
  -6  -3   2  372.56   55.59
   6  -3  -2  276.27   17.50
   6  -3  -2  275.37   18.70
   6  -3  -2  292.17   16.60
   6  -3  -2  265.47   14.50
   6  -3  -2  264.57   16.10
  -6  -3   2  308.77   13.30
  -6  -3   2  279.37   16.80
   6   3  -2  269.67   19.00
   6   3  -2  299.87   17.90
   6   3  -2  237.18   22.10
  -6   3   2  294.37   12.90
   6   3  -2  282.37   16.20
  -6   3   2  252.27   15.30
   6   3  -2  277.57   16.70
  -5  -3   2  449.95   30.80
  -5  -3   2  393.46   43.10
  -5  -3   2  434.06   18.10
  -5  -3   2  405.16   33.10
  -5   3   2  432.76   17.80
  -5   3   2  463.25   35.40
  -5   3   2  442.16   35.00
   4  -3  -2  158.88   12.90
  -4  -3   2  155.98   22.80
  -4  -3   2  161.48   17.00
   4  -3  -2  156.58   13.70
  -4   3   2  148.29   18.20
   4   3  -2  194.68   14.30
  -4   3   2  166.78   19.30
  -3  -3   2  873.81   41.70
   3  -3  -2  923.51   43.50
  -3  -3   2 1054.99   40.20
  -3  -3   2  935.71   40.00
  -3  -3   2  869.91   42.80
   3   3  -2  959.30   43.50
  -3   3   2  962.80   40.20
  -3   3   2  996.20   41.80
  -3   3   2  814.92   43.90
   3   3  -2  849.72   44.10
  -2  -3   2  620.04   25.40
   2  -3  -2  600.14   27.70
  -2  -3   2  564.54   26.00
  -2  -3   2  557.94   27.00
  -2  -3   2  539.55   28.70
  -2   3   2  609.34   27.20
  -2   3   2  631.44   25.40
   2   3  -2  583.44   28.40
   2   3  -2  599.94   27.40
   2   3  -2  586.44   27.10
  -2   3   2  570.34   28.20
  -1  -3   2 1506.05   53.59
  -1  -3   2 1532.25   53.19
   1  -3  -2 1351.06   53.99
  -1  -3   2 1234.78   57.19
   1  -3  -2 1345.87   54.99
  -1  -3   2 1442.66   53.99
   1   3  -2 1288.47   54.99
  -1   3   2 1544.65   55.29
  -1   3   2 1331.37   55.49
   1   3  -2 1401.76   56.49
  -1   3   2 1403.16   51.69
   0  -3  -2 2424.16   84.29
   0  -3   2 2352.46   82.39
   0  -3  -2 2259.67   82.09
   0  -3   2 1964.60   86.69
   0   3  -2 2248.68   82.29
   0   3   2 2114.09   81.79
   0   3   2 2170.98   84.79
   0   3   2 2321.87   82.59
   0   3  -2 2201.88   82.99
   0   3  -2 2277.07   81.89
   0   3  -2 2086.19   85.69
  -1  -3  -2 1228.78   45.30
  -1  -3  -2 1267.37   49.20
   1  -3   2 1046.30   50.19
   1  -3   2 1202.08   45.00
  -1   3  -2 1256.77   45.30
  -1   3  -2 1028.80   46.90
  -1   3  -2 1256.67   45.60
  -1   3  -2 1205.98   49.10
  -2  -3  -2 3772.92  146.89
  -2   3  -2 4051.59  148.19
  -2   3  -2 4018.20  144.99
  -2   3  -2 3978.10  145.29
  -3  -3  -2 1363.26   61.29
  -3  -3  -2 1445.06   67.89
  -3  -3  -2 1400.66   60.69
  -3  -3  -2 1498.35   59.99
  -3   3  -2 1557.34   57.69
  -3   3  -2 1594.34   56.89
  -3   3  -2 1248.78   76.29
  -3   3  -2 1450.55   57.09
  -4  -3  -2  247.78   42.60
  -4  -3  -2  270.57   31.30
  -4   3  -2  292.07   35.40
   5  -3   2   86.19   11.70
   5  -3   2  105.59   12.50
   5  -3   2   77.39   10.20
   5  -3   2   77.69   10.30
   5  -3   2   83.69   14.40
   5   3   2  108.09   15.80
   5   3   2   75.59   11.90
   5   3   2  100.29   11.00
   5   3   2   56.69   11.60
   6  -3   2  112.89   10.50
   6  -3   2  111.19   11.50
   6  -3   2  128.89   14.50
   6  -3   2  110.09   10.80
  -6   3  -2   91.89   14.50
   6   3   2  120.19   12.80
   6   3   2  125.89   20.80
   6   3   2  101.69   13.10
   6   3   2  129.99   12.70
   7  -3   2   22.40    5.60
   7  -3   2   30.30    6.20
   7  -3   2   14.90    7.70
  -7  -3  -2   25.00    6.00
   7   3   2   28.30    7.50
   7   3   2   21.40    6.40
  -7   3  -2   27.20    4.70
   8  -3   2  287.37   15.30
   8  -3   2  279.67   14.40
  -8  -3  -2  266.27   13.90
  -8   3  -2  268.37   12.70
   8   3   2  260.27   16.30
   8   3   2  297.67   15.70
   9  -3   2   76.39    6.20
   9  -3   2   82.59    6.50
   9   3   2   84.29    7.30
  -9   3  -2   73.39    7.40
  -9   3  -2   80.79    6.60
   9   3   2   71.89    7.00
  10  -4  -2    9.40    3.60
 -10  -4   2    4.00    2.60
 -10  -4   2    1.00    2.50
 -10   4   2    3.80    1.90
  10   4  -2    8.50    4.10
 -10   4   2    5.10    2.30
  10   4  -2   -2.10    5.10
   9  -4  -2    3.00    5.30
   9  -4  -2   -1.50    5.50
  -9  -4   2   -2.40    2.90
  -9  -4   2    5.30    3.60
   9  -4  -2    2.90    6.30
   9  -4  -2    6.50    6.30
  -9   4   2    3.30    2.40
   9   4  -2    5.30    5.60
   9   4  -2   -0.90    6.70
  -9   4   2    3.70    3.20
   9   4  -2    3.20    8.10
   9   4  -2    4.50    4.00
   8  -4  -2    8.50    6.40
   8  -4  -2    4.50    5.40
   8  -4  -2    6.30    7.30
  -8  -4   2    3.40    3.40
   8  -4  -2   19.90    6.90
  -8  -4   2   10.30    4.50
   8  -4  -2    3.10    5.00
   8   4  -2    5.30    7.70
  -8   4   2    1.70    3.80
   8   4  -2    3.90    6.20
  -8   4   2    5.70    2.80
   8   4  -2   14.00    6.90
   8   4  -2    4.90    7.20
   8   4  -2    1.50    7.00
   7  -4  -2  245.98   18.20
   7  -4  -2  236.88   19.60
   7  -4  -2  249.78   15.30
  -7  -4   2  279.97   13.20
  -7  -4   2  284.97   16.20
   7   4  -2  248.18   20.20
   7   4  -2  257.17   20.80
   7   4  -2  238.48   16.00
  -7   4   2  266.77   12.30
   6  -4  -2  171.08   13.40
   6  -4  -2  180.28   18.40
   6  -4  -2  171.88   16.60
   6  -4  -2  206.38   15.40
  -6  -4   2  186.28   10.10
   6  -4  -2  196.78   13.40
  -6  -4   2  189.88   14.10
   6  -4  -2  185.08   11.70
   6   4  -2  164.98   13.50
   6   4  -2  142.89   19.40
   6   4  -2  189.88   15.60
  -6   4   2  191.98   11.80
   6   4  -2  169.08   16.70
  -6   4   2  179.68    9.40
   6   4  -2  178.88   13.00
  -5  -4   2  162.78   39.00
  -5  -4   2  151.38   27.00
  -5  -4   2  156.18    9.20
  -5  -4   2  215.68   24.60
  -5   4   2  174.58   29.80
  -5   4   2  182.28    8.80
  -5   4   2  180.38   29.80
   4  -4  -2  158.48   16.70
  -4  -4   2  159.38   17.70
   4  -4  -2  160.88   15.40
  -4  -4   2  131.99   23.80
  -4  -4   2  150.48   26.90
  -4  -4   2  161.38   17.10
  -4   4   2  160.28   19.20
  -4   4   2  138.19   20.50
   4   4  -2  194.18   15.90
  -3  -4   2  713.23   31.90
  -3  -4   2  656.73   35.50
  -3  -4   2  650.43   35.60
  -3  -4   2  735.23   32.70
   3   4  -2  814.92   33.10
  -3   4   2  717.63   34.50
  -3   4   2  714.73   33.00
  -3   4   2  663.43   38.50
  -2  -4   2 1478.25   59.29
  -2  -4   2 1693.33   61.29
  -2  -4   2 1519.45   58.59
  -2  -4   2 1357.66   62.39
  -2   4   2 1521.15   60.59
   2   4  -2 1633.64   61.19
   2   4  -2 1478.65   60.49
  -2   4   2 1494.45   61.99
  -2   4   2 1486.25   58.39
   2   4  -2 1416.56   61.29
  -1  -4   2 5469.75  190.58
   1  -4  -2 5150.58  191.98
  -1  -4   2 5040.00  194.78
   1  -4  -2 5290.47  192.68
   1   4  -2 4587.04  190.58
  -1   4   2 5525.95  191.38
   1   4  -2 5056.99  191.48
   1   4  -2 5414.76  190.98
   1   4  -2 5388.66  193.38
  -1   4   2 4873.51  193.88
  -1   4   2 5338.57  188.18
   0  -4   2  201.18   16.90
   0  -4  -2  236.18   11.70
   0  -4   2  251.07   11.90
   0  -4  -2  232.68   13.60
   0  -4   2  226.08   13.50
   0   4   2  224.28   12.20
   0   4  -2  233.78   13.20
   0   4  -2  221.78   11.50
   0   4  -2  234.98   15.00
   0   4  -2  240.78   12.10
   0   4   2  223.28   11.60
  -1  -4  -2  376.26   16.20
   1  -4   2  355.16   23.50
   1  -4   2  439.56   17.30
  -1  -4  -2  379.76   16.30
  -1  -4  -2  376.76   20.50
  -1   4  -2  404.46   17.20
   1   4   2  370.66   16.50
  -1   4  -2  345.17   18.90
   1   4   2  317.57   23.00
  -1   4  -2  387.86   20.60
  -1   4  -2  382.26   17.90
  -2  -4  -2 1621.74   70.09
  -2  -4  -2 1634.04   64.69
  -2  -4  -2 1785.52   61.99
   2  -4   2 1477.75   69.59
  -2   4  -2 1726.63   64.29
  -2   4  -2 1736.53   66.59
  -2   4  -2 1681.63   63.99
  -3  -4  -2  140.49   19.80
  -3  -4  -2  112.89   27.00
  -3  -4  -2  120.39   16.70
  -3   4  -2  116.79   14.80
  -3   4  -2  137.89   16.10
  -3   4  -2  140.19   23.00
  -3   4  -2  138.89   13.80
  -4  -4  -2  102.09   29.00
  -4  -4  -2   86.39   20.40
  -4   4  -2  128.89   22.40
  -4   4  -2   79.69   22.60
   5  -4   2   48.70    7.30
   5  -4   2   53.69   10.60
   5  -4   2   48.20    7.60
   5  -4   2   48.00    9.00
   5  -4   2   53.79    8.30
   5   4   2   65.99    9.60
   5   4   2   41.40    8.20
   5   4   2   63.69   11.20
   5   4   2   59.79   12.30
   6  -4   2  210.58   13.40
   6  -4   2  218.58   14.80
   6  -4   2  183.28   14.90
   6  -4   2  214.18   12.90
   6   4   2  196.08   15.30
   6   4   2  190.38   16.20
   6   4   2  188.98   16.70
   6   4   2  184.78   15.50
  -6   4  -2  230.88   14.70
   7  -4   2   84.69    9.10
   7  -4   2   67.99    9.80
   7  -4   2   82.59   12.10
  -7  -4  -2   66.69   10.10
   7  -4   2   90.29    9.30
   7  -4   2   65.99   13.00
  -7   4  -2   75.79    7.30
   7   4   2   71.19   11.20
   7   4   2   76.79   11.10
   7   4   2   81.69   11.60
  -8  -4  -2   35.40    5.30
   8  -4   2   20.00    4.70
   8   4   2   40.00    8.30
  -8   4  -2   22.30    3.80
   8   4   2   28.50    6.40
   9  -4   2   12.20    3.20
   9  -4   2   11.40    3.00
   9   4   2   13.00    4.00
  -9   4  -2   12.40    3.30
   9   4   2   10.60    3.70
  10  -5  -2   72.29    7.30
 -10  -5   2   65.89    5.70
  10  -5  -2   88.69    6.50
 -10  -5   2   80.49    5.40
 -10   5   2   84.19    5.10
  10   5  -2   67.69    7.80
  10   5  -2   79.39   10.20
 -10   5   2   78.99    4.70
  10   5  -2   93.19   13.90
   9  -5  -2  135.19   12.40
   9  -5  -2  131.99   11.30
   9  -5  -2  130.19   11.30
   9  -5  -2  105.79   10.30
  -9  -5   2  104.79    7.90
  -9  -5   2  105.59    7.80
  -9   5   2  122.59    7.10
   9   5  -2  110.29   11.10
   9   5  -2  107.39    7.90
  -9   5   2  111.49    6.80
   9   5  -2  133.79   15.40
   9   5  -2  123.19   12.90
   9   5  -2  105.69   14.00
   8  -5  -2   10.80    7.00
   8  -5  -2    7.80    3.70
  -8  -5   2   12.50    4.70
   8  -5  -2   14.90    5.90
   8  -5  -2   12.80    5.20
   8  -5  -2   22.10    6.90
  -8   5   2   19.00    4.10
   8   5  -2   19.80    7.00
   8   5  -2    1.70    4.80
   8   5  -2   15.30    6.30
   8   5  -2    7.90    8.10
   8   5  -2    8.50    7.00
  -7  -5   2   95.49   13.90
   7  -5  -2   72.39    7.90
  -7  -5   2   72.39    7.50
   7  -5  -2   76.49    9.80
   7  -5  -2   52.49    9.80
  -7   5   2   70.39    7.80
  -7   5   2   75.89    6.20
   7   5  -2   73.29    9.90
   7   5  -2   68.09   10.40
   7   5  -2   81.69   12.30
   7   5  -2   65.69   15.70
   7   5  -2   67.29   12.60
   6  -5  -2  163.98   10.50
   6  -5  -2  156.68   12.00
   6  -5  -2  130.49   17.10
   6  -5  -2  134.49   12.00
  -6  -5   2  149.79   13.30
   6  -5  -2  139.49   16.20
  -6  -5   2  160.28    9.20
   6   5  -2  159.68   12.60
   6   5  -2  154.98   19.10
   6   5  -2  147.39   12.60
  -6   5   2  167.28    8.40
   6   5  -2  163.98   15.80
   6   5  -2  143.59   15.50
  -6   5   2  152.78   10.60
  -5  -5   2  609.44   37.20
  -5  -5   2  626.84   40.70
  -5  -5   2  585.64   51.89
  -5  -5   2  610.84   24.20
  -5   5   2  621.34   45.10
  -5   5   2  602.14   44.10
  -5   5   2  583.44   23.60
  -4  -5   2 1153.28   59.29
   4  -5  -2 1163.88   52.79
  -4  -5   2 1197.48   45.10
  -4  -5   2 1075.09   58.19
  -4  -5   2 1197.28   52.79
  -4   5   2 1229.18   44.80
   4   5  -2 1372.06   52.69
  -3  -5   2 1768.62   69.49
  -3  -5   2 1552.84   73.89
  -3  -5   2 1759.72   69.99
  -3  -5   2 1719.53   73.59
  -3   5   2 1801.12   72.39
  -3   5   2 1768.92   70.69
  -3   5   2 1659.63   76.09
   3   5  -2 1973.10   71.39
  -2  -5   2 1196.68   49.30
  -2  -5   2 1170.48   47.70
  -2  -5   2 1164.18   47.00
  -2  -5   2 1082.79   52.49
   2  -5  -2 1180.18   49.20
  -2   5   2 1158.78   49.20
  -2   5   2 1228.78   51.49
   2   5  -2 1149.19   49.80
   2   5  -2 1367.76   50.59
  -2   5   2 1179.08   47.10
   2   5  -2 1069.39   50.49
   1  -5  -2 7319.97  261.57
  -1  -5   2 6708.53  263.37
  -1  -5   2 7050.99  258.17
   1  -5  -2 7088.29  258.57
  -1  -5   2 7502.15  258.67
   1   5  -2 6371.96  259.37
   1   5  -2 7022.70  258.97
   1   5  -2 7117.49  259.87
  -1   5   2 7173.28  256.07
  -1   5   2 7194.58  261.07
   1   5  -2 7348.46  261.47
  -1   5   2 6822.82  258.07
  -1   5   2 7220.38  259.37
   0  -5   2 1984.80   76.79
   0  -5   2 1881.11   81.49
   0  -5  -2 2222.48   78.79
   0  -5   2 2056.39   75.69
   0  -5  -2 2011.50   75.29
   0   5  -2 2018.80   75.59
   0   5   2 1997.80   80.19
   0   5  -2 2012.20   78.99
   0   5   2 2085.69   76.19
   0   5  -2 1701.93   78.49
   0   5  -2 1998.40   76.39
   0   5   2 2023.40   75.39
  -1  -5  -2  597.04   22.40
  -1  -5  -2  561.24   24.90
  -1  -5  -2  581.34   28.00
   1  -5   2  561.64   24.30
   1  -5   2  516.55   31.30
  -1   5  -2  533.75   26.20
   1   5   2  590.04   24.00
  -1   5  -2  553.24   26.00
  -1   5  -2  594.64   27.60
   1   5   2  498.75   31.90
  -1   5  -2  553.04   24.30
   1   5   2  551.64   24.20
   2  -5   2  757.72   42.60
  -2  -5  -2  825.12   41.10
  -2  -5  -2  909.31   33.30
  -2  -5  -2  917.81   35.20
  -2   5  -2  830.42   35.80
  -2   5  -2  893.61   37.80
   2   5   2  817.62   33.10
   2   5   2  754.22   34.00
  -2   5  -2  862.11   35.60
  -2   5  -2  747.53   40.80
  -3  -5  -2 1222.08   61.79
  -3  -5  -2 1231.68   53.59
  -3  -5  -2 1284.77   57.69
  -3   5  -2 1275.07   53.39
  -3   5  -2 1213.18   59.99
  -3   5  -2 1293.37   52.89
  -3   5  -2 1270.97   52.99
  -4  -5  -2  194.48   44.40
  -4  -5  -2  167.28   31.90
  -4   5  -2  188.18   31.80
   5  -5   2  213.08   12.80
   5  -5   2  178.78   13.80
   5  -5   2  182.18   12.80
   5  -5   2  191.08   14.30
   5  -5   2  193.58   14.60
   5   5   2  196.98   12.20
   5   5   2  231.08   19.70
   5   5   2  164.68   16.40
  -5   5  -2  169.08   12.40
   5   5   2  191.28   15.70
   6  -5   2    1.40    6.80
   6  -5   2    0.00    5.00
   6  -5   2    3.90    5.20
   6  -5   2    4.20    4.60
   6  -5   2   -0.70    6.40
   6   5   2    2.70    6.90
   6   5   2  -10.10    6.70
   6   5   2   12.10    5.50
   6   5   2   14.90    8.00
  -6   5  -2   -4.40    3.90
   7  -5   2  172.18   13.60
  -7  -5  -2  139.19   11.80
   7  -5   2  174.38   12.60
   7  -5   2  155.28   11.10
   7  -5   2  170.08   13.90
  -7   5  -2  161.38    9.30
   7   5   2  146.49   13.60
   7   5   2  142.09   12.20
   7   5   2  154.48   13.80
  -8  -5  -2   38.00    5.30
   8  -5   2   47.60    6.50
   8  -5   2   45.50    7.10
   8  -5   2   50.89    7.50
   8   5   2   49.10    7.10
  -8   5  -2   46.00    8.40
   8   5   2   43.60    9.40
  -8   5  -2   42.60    5.50
   9  -5   2  161.08    8.10
   9  -5   2  162.98    8.60
   9   5   2  146.59    9.50
  -9   5  -2  147.19    8.30
   9   5   2  143.09    9.00
 -10  -6   2   13.10    2.80
 -10  -6   2   14.40    2.80
  10  -6  -2   23.00    4.70
  10   6  -2   23.00   10.00
 -10   6   2   14.70    2.50
  10   6  -2   16.00    6.30
  10   6  -2   12.80    4.40
 -10   6   2   15.60    2.90
   9  -6  -2  192.78   16.60
  -9  -6   2  210.98   11.20
   9  -6  -2  216.68   12.10
   9  -6  -2  244.48   14.20
   9  -6  -2  228.98   13.40
  -9  -6   2  217.38   11.40
   9  -6  -2  236.48   13.30
   9   6  -2  248.58   14.90
   9   6  -2  233.88   14.30
   9   6  -2  218.58   14.90
   9   6  -2  214.78   16.90
  -9   6   2  210.58   10.30
  -9   6   2  212.68   10.20
  -8  -6   2   76.69    7.40
  -8  -6   2   70.89    8.20
   8  -6  -2   50.59   10.20
   8  -6  -2   56.19    8.40
   8  -6  -2   55.49    8.80
   8  -6  -2   64.19    9.90
   8  -6  -2   62.19    7.60
  -8   6   2   60.39    6.40
   8   6  -2   56.19   11.80
   8   6  -2   65.39   11.80
  -8   6   2   69.39    5.80
   8   6  -2   64.29    9.20
   8   6  -2   80.99   12.30
   8   6  -2   57.09   11.00
   8   6  -2   62.59   14.10
   7  -6  -2  147.89   14.60
   7  -6  -2  153.28   10.20
   7  -6  -2  149.59   11.70
  -7  -6   2  141.49    9.60
  -7  -6   2  148.59   11.50
   7  -6  -2  152.88   11.80
   7  -6  -2  161.08   14.80
   7   6  -2  124.99   16.60
   7   6  -2  142.49   14.30
   7   6  -2  145.79   11.60
  -7   6   2  145.29    8.30
  -7   6   2  155.88    9.50
   7   6  -2  128.89   14.70
   7   6  -2  132.89   11.70
  -6  -6   2  263.57   16.00
   6  -6  -2  247.28   19.20
  -6  -6   2  273.87   12.90
   6  -6  -2  216.48   18.80
   6  -6  -2  266.47   14.90
   6  -6  -2  271.87   15.30
   6  -6  -2  256.97   13.40
   6   6  -2  254.07   18.70
   6   6  -2  280.17   15.50
   6   6  -2  260.47   15.60
   6   6  -2  257.37   18.80
  -6   6   2  254.17   13.30
   6   6  -2  251.67   20.80
  -6   6   2  262.67   11.90
  -5  -6   2  428.06   32.50
  -5  -6   2  377.66   16.90
  -5  -6   2  399.36   50.59
  -5  -6   2  431.46   36.30
  -5   6   2  392.56   40.40
  -5   6   2  390.06   16.30
  -5   6   2  376.76   41.60
  -4  -6   2  412.26   17.10
  -4  -6   2  397.06   25.80
   4  -6  -2  411.16   29.00
  -4  -6   2  417.46   26.70
  -4  -6   2  371.76   42.00
  -4  -6   2  388.86   33.60
  -4   6   2  414.56   30.30
   4   6  -2  438.96   27.50
  -4   6   2  397.56   16.40
  -4   6   2  399.36   31.10
  -3  -6   2  343.37   20.40
  -3  -6   2  343.77   24.40
  -3  -6   2  351.76   20.10
  -3  -6   2  265.77   29.90
   3  -6  -2  334.07   23.00
  -3   6   2  313.27   23.60
   3   6  -2  387.06   22.50
  -3   6   2  342.07   21.60
   2  -6  -2  771.62   38.30
  -2  -6   2  804.02   42.90
  -2  -6   2  831.02   37.80
  -2  -6   2  870.31   35.80
  -2  -6   2  844.62   36.10
  -2   6   2  857.31   38.20
   2   6  -2  932.51   39.20
  -2   6   2  786.32   37.70
  -2   6   2  872.31   35.80
   2   6  -2  895.01   42.20
  -2   6   2  860.41   40.90
   2   6  -2  751.12   39.00
  -1  -6   2 2167.18   92.49
   1  -6  -2 2257.67   89.69
  -1  -6   2 2189.48   85.69
  -1  -6   2 2422.56   86.89
   1  -6  -2 2181.88   86.19
   1   6  -2 2109.29   88.29
   1   6  -2 2342.37   85.89
   1   6  -2 2164.68   88.09
  -1   6   2 2132.89   85.99
  -1   6   2 2367.26   87.49
   1   6  -2 2344.97   89.29
  -1   6   2 2349.26   85.89
   1   6  -2 2250.87   87.19
  -1   6   2 2311.87   89.89
   0  -6   2  350.56   26.10
   0  -6   2  381.26   18.40
   0  -6  -2  367.96   18.60
   0  -6   2  383.76   20.30
   0  -6  -2  415.36   21.60
   0   6   2  384.86   19.20
   0   6  -2  408.86   18.70
   0   6  -2  372.46   21.00
   0   6   2  373.46   15.20
   0   6   2  373.76   24.90
   0   6  -2  358.76   20.00
   1  -6   2  402.36   29.80
   1  -6   2  449.16   20.70
  -1  -6  -2  457.95   17.70
  -1  -6  -2  422.96   20.50
  -1  -6  -2  425.46   19.70
   1   6   2  370.76   30.80
  -1   6  -2  448.16   23.80
  -1   6  -2  436.36   20.60
   1   6   2  408.06   21.50
   1   6   2  419.86   19.60
  -1   6  -2  400.26   22.50
  -1   6  -2  416.36   23.10
   1   6   2  430.76   20.40
  -2  -6  -2 2226.08   83.09
  -2  -6  -2 2089.69   88.89
  -2  -6  -2 2189.48   90.49
   2  -6   2 1994.30   92.49
  -2  -6  -2 2360.16   82.69
  -2   6  -2 2361.66   87.39
   2   6   2 2061.69   83.99
  -2   6  -2 2363.86   85.39
  -2   6  -2 2168.48   85.19
  -2   6  -2 2076.19   89.69
  -3  -6  -2 1063.69   56.79
  -3  -6  -2 1147.69   43.10
  -3  -6  -2 1034.70   47.00
  -3  -6  -2  990.70   54.59
  -3   6  -2 1101.69   56.29
  -3   6  -2 1087.19   47.90
  -3   6  -2 1061.39   47.80
   4  -6   2  120.19   14.40
   4  -6   2  119.89   12.60
  -4  -6  -2  102.49   23.30
  -4  -6  -2   93.09   28.80
   4   6   2  110.09   19.90
  -4   6  -2   89.49   11.70
  -4   6  -2   95.99   30.80
  -4   6  -2  167.88   30.10
   5  -6   2    7.40    5.90
   5  -6   2   11.90    5.60
   5  -6   2    4.50    5.70
   5  -6   2    8.10    5.00
   5  -6   2   10.80    6.10
   5   6   2    4.50    7.40
   5   6   2   -0.50    4.30
   5   6   2   -8.20    9.30
  -5   6  -2   -0.80    3.90
   5   6   2   -1.80    8.10
   6  -6   2  918.91   37.10
   6  -6   2  899.41   36.50
   6  -6   2  883.81   37.50
   6  -6   2  896.81   36.70
   6  -6   2  884.31   35.70
   6   6   2  859.01   38.70
   6   6   2  787.92   39.00
   6   6   2  859.61   38.10
   6   6   2  844.42   35.70
  -6   6  -2  926.51   34.10
   7  -6   2   36.20    7.00
  -7  -6  -2   18.00    6.00
   7  -6   2   37.60    7.50
   7  -6   2   28.70    6.90
   7  -6   2   40.30    8.10
   7   6   2   38.90    7.80
   7   6   2   22.60    7.50
  -7   6  -2   26.10    4.10
   7   6   2   32.20    6.30
   7   6   2   36.70    7.90
   8  -6   2   15.00    6.30
   8  -6   2    8.70    4.10
   8  -6   2    6.40    3.50
  -8  -6  -2    8.00    4.40
   8   6   2    1.40    9.50
   8   6   2   11.70    5.80
  -8   6  -2   11.60    3.10
   8   6   2   14.50    5.10
  -8   6  -2    7.70    4.20
   9  -6   2   66.99    5.80
   9  -6   2   58.99    5.10
  -9   6  -2   74.29    6.70
   9   6   2   57.29    6.70
 -10  -7   2   11.00    2.70
 -10  -7   2    8.90    2.50
 -10   7   2    9.90    2.40
  10   7  -2    5.50    4.20
  -9  -7   2   98.89    7.40
   9  -7  -2  104.19   12.80
   9  -7  -2   93.09    9.00
  -9  -7   2   88.29    6.90
   9  -7  -2   71.79   10.00
   9  -7  -2   89.09    7.90
   9  -7  -2   94.39   11.10
   9   7  -2  105.19   11.40
   9   7  -2  101.59   10.90
  -9   7   2   87.29    5.70
   9   7  -2   84.19   13.10
  -9   7   2   81.79    5.70
   9   7  -2   86.39   11.40
   8  -7  -2  189.88   12.10
  -8  -7   2  189.08   11.80
   8  -7  -2  180.78   12.40
   8  -7  -2  208.18   13.70
   8  -7  -2  194.68   10.50
  -8  -7   2  209.88   11.20
   8  -7  -2  180.28   14.00
   8   7  -2  177.88   12.40
   8   7  -2  149.39   18.00
  -8   7   2  200.88   10.00
   8   7  -2  207.68   12.10
   8   7  -2  192.88   15.50
  -8   7   2  190.18    9.60
   8   7  -2  191.58   15.50
   7  -7  -2  478.85   20.60
   7  -7  -2  479.45   23.40
   7  -7  -2  480.55   21.70
  -7  -7   2  454.35   21.50
   7  -7  -2  475.75   21.90
  -7  -7   2  477.05   20.60
   7  -7  -2  440.26   23.70
   7   7  -2  456.65   25.00
   7   7  -2  483.55   22.10
  -7   7   2  489.45   19.50
  -7   7   2  488.55   20.00
   7   7  -2  450.25   21.90
   7   7  -2  439.86   24.00
   6  -7  -2   64.39   16.50
   6  -7  -2   86.59   14.80
  -6  -7   2   78.39    7.20
   6  -7  -2   82.99    7.80
   6  -7  -2   68.09   10.00
  -6  -7   2   93.09   11.40
   6  -7  -2   70.29    9.70
   6   7  -2   77.09   12.40
   6   7  -2   68.19   10.20
   6   7  -2   53.39   10.40
  -6   7   2   82.19    5.80
  -6   7   2   82.89    7.70
   6   7  -2   61.49    9.90
   6   7  -2   70.89   10.30
   5  -7  -2  404.76   18.80
   5  -7  -2  398.06   19.70
  -5  -7   2  384.06   38.60
  -5  -7   2  420.86   17.70
  -5  -7   2  387.76   53.29
  -5  -7   2  440.96   35.00
  -5   7   2  427.56   17.00
   5   7  -2  402.96   20.80
   5   7  -2  436.76   20.20
  -5   7   2  374.76   47.40
   5   7  -2  416.16   23.90
  -5   7   2  454.65   44.70
  -4  -7   2   23.40   10.40
  -4  -7   2   34.90   12.80
  -4  -7   2   58.59    5.80
  -4  -7   2   31.50   17.40
  -4  -7   2   44.30   28.50
  -4   7   2   78.59   16.90
  -4   7   2   45.50    4.50
  -4   7   2   56.69   16.40
  -3  -7   2   46.70    8.80
  -3  -7   2   45.50    9.90
  -3  -7   2   33.70   19.10
  -3  -7   2   37.60   11.10
   3  -7  -2   61.59   13.50
   3   7  -2   58.69   11.20
  -3   7   2   43.40   11.60
  -3   7   2   41.80   11.30
  -2  -7   2  527.25   24.70
  -2  -7   2  521.55   27.00
   2  -7  -2  467.55   29.20
   2  -7  -2  487.35   28.90
  -2  -7   2  497.15   24.80
  -2  -7   2  458.85   35.20
  -2   7   2  521.15   25.10
   2   7  -2  530.75   28.10
   2   7  -2  490.75   24.80
   2   7  -2  539.45   31.20
  -2   7   2  545.35   32.30
  -2   7   2  500.65   27.70
  -1  -7   2 1922.11   70.09
   1  -7  -2 1651.53   68.89
  -1  -7   2 1837.82   68.49
  -1  -7   2 1866.31   77.79
   1  -7  -2 1750.22   72.99
   1   7  -2 1716.23   71.89
  -1   7   2 1841.62   74.19
   1   7  -2 1604.34   72.09
   1   7  -2 1757.42   68.39
   1   7  -2 1799.42   71.99
  -1   7   2 1693.83   69.79
  -1   7   2 1592.64   70.49
   1   7  -2 1725.53   70.09
   0  -7   2  720.53   43.00
   0  -7  -2  862.11   38.10
   0  -7  -2  796.62   34.70
   0  -7   2  813.72   34.10
   0  -7   2  781.12   36.60
   0   7   2  808.72   42.40
   0   7  -2  835.02   34.30
   0   7   2  798.52   31.00
   0   7  -2  846.52   37.80
   0   7  -2  742.33   37.00
   0   7  -2  813.22   37.30
   0   7   2  827.02   35.20
   0   7   2  756.92   35.00
   0   7  -2  768.72   35.80
  -1  -7  -2 2776.92  102.79
  -1  -7  -2 2853.11  108.09
   1  -7   2 2512.95  112.39
  -1  -7  -2 2708.43  103.29
   1   7   2 2587.24  101.59
   1   7   2 2371.46  113.19
   1   7   2 2703.23  103.99
  -1   7  -2 2937.21  107.39
  -1   7  -2 2727.93  105.19
  -1   7  -2 2841.42  103.79
  -1   7  -2 2697.93  106.19
   1   7   2 2967.00  103.69
  -2  -7  -2  822.32   42.60
  -2  -7  -2  818.52   33.90
  -2  -7  -2  718.53   43.00
  -2  -7  -2  810.72   33.40
   2  -7   2  741.13   49.30
   2   7   2  724.83   38.20
   2   7   2  776.52   35.10
  -2   7  -2  865.41   37.30
  -2   7  -2  860.01   39.10
  -2   7  -2  753.02   43.10
  -2   7  -2  836.62   39.70
  -3  -7  -2  592.44   27.30
  -3  -7  -2  521.85   41.10
  -3  -7  -2  532.85   30.50
  -3   7  -2  610.14   33.80
  -3   7  -2  563.84   32.90
   4  -7   2   19.50    6.60
   4  -7   2   27.00    7.00
  -4  -7  -2    2.40   22.10
   4  -7   2   21.40    6.60
   4  -7   2   20.80    5.40
  -4  -7  -2   25.30   29.90
  -4   7  -2   25.90   21.80
   4   7   2   19.50    9.00
  -4   7  -2   27.20    4.20
   4   7   2   35.00    6.30
   5  -7   2   12.90    5.60
   5  -7   2   21.20    6.30
   5  -7   2   23.00    5.00
   5  -7   2   23.50    6.50
   5  -7   2   12.50    5.30
   5   7   2   11.40    5.30
   5   7   2    3.00    8.40
   5   7   2   17.40    7.40
   5   7   2   17.00   10.70
  -5   7  -2   17.10    3.90
   6  -7   2  595.64   26.20
   6  -7   2  599.94   26.70
  -6  -7  -2  555.74   24.70
   6  -7   2  609.74   25.90
   6  -7   2  561.34   25.10
   6  -7   2  636.84   27.30
   6   7   2  513.35   28.80
  -6   7  -2  603.34   23.50
   6   7   2  602.74   28.40
   6   7   2  539.65   29.30
   6   7   2  561.54   25.40
   7  -7   2   78.99    9.00
   7  -7   2   80.59    8.60
   7  -7   2   78.99   10.70
   7  -7   2   92.79   10.90
  -7  -7  -2   64.39    9.80
   7   7   2   71.09    9.50
  -7   7  -2   78.89    6.50
   7   7   2  100.69   13.00
   7   7   2   62.49   11.90
   7   7   2   75.19   12.00
   8  -7   2   29.10    5.70
   8  -7   2   35.60    6.20
   8  -7   2   24.70    6.00
   8  -7   2   49.90    9.80
   8   7   2   34.90    6.50
   8   7   2   25.40    5.90
   8   7   2   31.90    6.00
  -8   7  -2   33.30    5.10
  -8   7  -2   31.80    5.90
   9  -7   2   46.80    6.90
   9  -7   2   39.50    4.70
   9   7   2   35.80    8.10
   9   7   2   29.60    6.20
 -10  -8   2   23.90    4.70
  10  -8  -2   30.40    6.70
 -10  -8   2   33.30    4.70
  10   8  -2   31.90    4.90
  -9  -8   2   57.49    6.20
  -9  -8   2   59.59    6.20
   9  -8  -2   72.39    8.30
   9  -8  -2   61.29   11.20
   9  -8  -2   65.39    6.80
   9   8  -2   79.49   10.50
  -9   8   2   67.09    5.00
   9   8  -2   65.69   10.90
   9   8  -2   54.99   13.20
  -9   8   2   58.59    4.80
   9   8  -2   69.89   10.20
   8  -8  -2  259.57   15.70
   8  -8  -2  265.37   14.70
  -8  -8   2  248.18   13.80
  -8  -8   2  272.57   13.60
   8  -8  -2  279.57   14.50
   8  -8  -2  241.98   16.00
   8   8  -2  276.27   18.40
  -8   8   2  270.67   12.40
  -8   8   2  271.47   12.20
   8   8  -2  273.17   20.30
   8   8  -2  267.47   15.00
   8   8  -2  289.07   14.30
   8   8  -2  275.27   17.90
   8   8  -2  253.57   17.70
  -7  -8   2  597.44   25.10
   7  -8  -2  608.24   24.90
   7  -8  -2  558.04   27.60
   7  -8  -2  580.84   26.10
  -7  -8   2  590.14   25.80
   7  -8  -2  606.54   26.00
   7  -8  -2  617.14   27.40
   7   8  -2  540.35   30.90
   7   8  -2  576.44   28.40
   7   8  -2  571.64   26.20
  -7   8   2  608.64   24.20
   7   8  -2  612.04   29.80
  -7   8   2  619.94   23.90
   7   8  -2  622.84   26.60
  -6  -8   2  411.96   20.20
   6  -8  -2  413.26   22.00
   6  -8  -2  400.26   20.00
   6  -8  -2  418.36   19.70
   6  -8  -2  427.26   23.80
  -6  -8   2  424.16   18.40
   6  -8  -2  423.36   18.80
   6   8  -2  377.76   24.70
  -6   8   2  433.46   17.30
   6   8  -2  419.26   24.20
   6   8  -2  415.46   24.10
   6   8  -2  407.36   20.00
   6   8  -2  403.06   20.70
  -6   8   2  419.76   17.90
   5  -8  -2  686.23   28.00
  -5  -8   2  630.44   28.90
   5  -8  -2  659.33   27.40
   5  -8  -2  640.44   28.90
  -5  -8   2  705.53   44.50
  -5   8   2  649.64   58.89
  -5   8   2  675.73   26.60
   5   8  -2  624.84   29.20
   5   8  -2  699.33   28.60
  -5   8   2  682.53   57.79
   5   8  -2  658.23   32.10
  -4  -8   2   94.59   20.30
  -4  -8   2  183.18   22.40
  -4  -8   2  141.09    8.30
  -4  -8   2  129.49   20.10
  -4   8   2  213.28   30.50
  -4   8   2  113.89   20.90
   4   8  -2  134.09   23.40
  -3  -8   2  713.03   33.90
  -3  -8   2  732.93   38.90
  -3  -8   2  668.03   26.70
  -3  -8   2  698.23   33.90
   3  -8  -2  616.84   40.70
  -3   8   2  667.93   26.10
  -3   8   2  649.43   38.30
  -3   8   2  690.23   36.50
   3   8  -2  735.73   38.00
   3   8  -2  696.93   34.20
  -2  -8   2  634.84   32.20
   2  -8  -2  591.94   36.50
  -2  -8   2  606.44   29.70
  -2  -8   2  578.84   44.10
  -2   8   2  674.53   30.50
  -2   8   2  606.14   32.90
   2   8  -2  634.64   29.90
   2   8  -2  629.94   33.70
  -1  -8   2 1391.96   91.39
   1  -8  -2 1765.62   72.69
  -1  -8   2 1648.54   66.39
   1  -8  -2 1561.94   71.49
   1  -8  -2 1949.41   69.09
  -1  -8   2 1778.92   68.79
   1   8  -2 1671.03   69.59
  -1   8   2 1747.33   68.99
   1   8  -2 1541.95   72.29
   1   8  -2 1529.65   71.19
  -1   8   2 1860.11   74.79
  -1   8   2 1660.93   63.59
   1   8  -2 1655.13   66.59
   1   8  -2 1748.23   70.79
   0  -8  -2  587.14   30.50
   0  -8  -2  517.05   27.80
   0  -8   2  559.24   26.10
   0  -8   2  550.64   39.60
   0  -8   2  544.25   29.20
   0   8   2  556.74   27.40
   0   8   2  536.05   37.30
   0   8   2  529.65   23.10
   0   8  -2  489.45   29.40
   0   8  -2  520.55   25.80
   0   8  -2  557.94   31.60
   0   8  -2  586.14   30.30
   0   8  -2  494.45   31.40
  -1  -8  -2  172.78   14.10
  -1  -8  -2  181.58   18.80
   1  -8   2  186.98   32.00
  -1  -8  -2  195.08   33.30
   1  -8   2  169.28   15.00
  -1  -8  -2  201.98   18.20
  -1   8  -2  156.38   22.30
  -1   8  -2  165.28   14.80
   1   8   2  150.38   14.80
  -1   8  -2  193.28   18.40
  -1   8  -2  157.18   20.90
   1   8   2  221.58   18.20
  -2  -8  -2 2998.50  110.09
  -2  -8  -2 3005.80  108.59
  -2  -8  -2 2856.61  118.29
   2  -8   2 2914.11  140.49
  -2   8  -2 2882.31  115.29
  -2   8  -2 2911.31  112.89
   2   8   2 2675.83  112.89
  -2   8  -2 2928.01  114.89
   2   8   2 2922.31  110.89
  -3  -8  -2 1194.38   63.99
  -3  -8  -2 1135.49   50.19
  -3   8  -2 1181.88   55.19
  -3   8  -2 1084.49   42.70
   4  -8   2   24.40    6.10
   4  -8   2   18.70    6.20
   4  -8   2   39.20   11.80
   4  -8   2   25.80    6.70
   4  -8   2   28.60    6.00
  -4   8  -2   19.10    3.40
   4   8   2   29.80    5.70
   4   8   2   16.90    8.60
   4   8   2   14.50    8.80
  -4   8  -2   41.50   26.70
   4   8   2   18.20   17.10
   5  -8   2   73.69    8.80
   5  -8   2   58.29    9.90
   5  -8   2   87.49   16.20
   5  -8   2   55.59    8.30
   5  -8   2   67.69    9.30
  -5   8  -2   57.59    6.10
   5   8   2   60.19   12.20
   5   8   2   48.50    8.10
   5   8   2   72.29   11.90
   5   8   2   42.50    9.60
   6  -8   2 1173.68   48.40
   6  -8   2 1182.58   47.50
   6  -8   2 1231.88   47.90
   6  -8   2 1275.07   49.00
  -6  -8  -2 1181.08   46.30
   6   8   2 1210.28   47.30
   6   8   2 1174.48   50.59
   6   8   2 1101.29   50.89
  -6   8  -2 1279.47   45.50
   6   8   2 1180.28   49.60
   7  -8   2   13.40    5.60
   7  -8   2   11.80    5.60
   7  -8   2   16.80    4.90
  -7  -8  -2   14.80    5.10
   7  -8   2   14.60    4.60
   7   8   2   14.10    7.20
  -7   8  -2   11.50    4.80
   7   8   2    6.30    7.90
  -7   8  -2   16.90    3.40
   7   8   2    9.10    4.80
   7   8   2   12.90    6.70
  -8  -8  -2  119.09    9.20
   8  -8   2  136.09   10.90
   8  -8   2  140.89    8.80
   8  -8   2  127.89    8.10
   8  -8   2  115.89   10.50
   8   8   2  111.69   10.40
  -8   8  -2  112.39    6.90
   8   8   2  107.29   10.90
   8   8   2   98.99    9.70
   9  -8   2   84.29    5.70
   9  -8   2   87.79    5.70
   9   8   2   78.19    7.40
   9   8   2   95.79    7.30
 -10  -9   2  119.29    6.10
 -10  -9   2  114.09    6.80
  10   9  -2  116.19    8.30
  -9  -9   2    9.10    3.30
  -9  -9   2   12.40    3.70
   9  -9  -2    7.50    5.50
   9  -9  -2   13.80    4.50
   9  -9  -2   13.00    3.60
  -9   9   2    8.20    2.30
   9   9  -2    6.80    9.50
   9   9  -2   14.10    5.50
   9   9  -2   11.80    7.20
  -9   9   2   10.90    2.30
   9   9  -2   10.50    5.60
   8  -9  -2  164.98   12.90
   8  -9  -2  155.08   10.60
   8  -9  -2  180.58   11.10
  -8  -9   2  141.59   10.30
  -8  -9   2  156.58    9.90
   8   9  -2  150.18   11.30
   8   9  -2  146.49   15.30
   8   9  -2  140.49   14.50
  -8   9   2  147.99    8.40
  -8   9   2  151.38    8.20
   8   9  -2  189.48   17.60
   8   9  -2  170.68   11.00
   8   9  -2  135.99   14.20
   7  -9  -2    4.50    5.20
   7  -9  -2    5.70    3.70
  -7  -9   2    6.60    3.80
  -7  -9   2    7.10    5.00
   7  -9  -2    8.10    4.90
   7  -9  -2    0.20    6.50
  -7   9   2    6.30    2.60
   7   9  -2   10.40    5.00
  -7   9   2    5.20    3.10
   7   9  -2    8.10    8.80
   7   9  -2    8.60    9.10
   7   9  -2    5.90    5.80
   7   9  -2   16.30    8.30
   6  -9  -2  292.97   16.80
  -6  -9   2  327.17   15.00
   6  -9  -2  327.47   19.80
   6  -9  -2  310.27   15.20
  -6  -9   2  290.57   16.60
   6  -9  -2  326.77   18.90
   6  -9  -2  316.07   16.00
  -6   9   2  309.67   13.60
   6   9  -2  323.17   21.20
   6   9  -2  303.77   21.30
   6   9  -2  309.57   16.80
  -6   9   2  306.07   14.10
   6   9  -2  294.17   21.70
   6   9  -2  321.37   17.70
  -5  -9   2  191.98   10.30
   5  -9  -2  197.18   14.80
   5  -9  -2  159.38   13.70
  -5  -9   2  189.08   13.30
   5  -9  -2  185.08   12.50
   5  -9  -2  187.48   11.60
  -5   9   2  199.08    9.00
   5   9  -2  230.18   20.00
   5   9  -2  170.88   18.70
   5   9  -2  187.28   14.40
   5   9  -2  190.08   12.90
  -5   9   2  180.58   10.20
  -4  -9   2  187.98   10.10
  -4  -9   2  210.58   24.50
  -4  -9   2  188.58   26.50
  -4  -9   2  202.38   36.70
   4   9  -2  184.78   28.10
  -4   9   2  230.48   37.20
  -4   9   2  198.98    9.10
  -4   9   2  206.78   28.00
  -3  -9   2  238.98   11.40
  -3  -9   2  241.78   20.70
  -3  -9   2  257.87   20.40
  -3  -9   2  237.28   27.00
  -3   9   2  250.77   10.50
  -3   9   2  270.57   24.90
   3   9  -2  248.38   21.90
  -3   9   2  226.68   27.20
   3   9  -2  188.98   29.50
  -2  -9   2   53.99    9.60
  -2  -9   2   64.29   15.30
   2   9  -2   75.39   24.80
   2   9  -2   65.69   10.20
  -2   9   2   45.30   12.10
   2   9  -2   52.69   11.20
  -2   9   2   61.59   11.30
  -1  -9   2  214.88   18.10
   1  -9  -2  159.78   23.50
   1  -9  -2  188.78   20.80
  -1  -9   2  181.98   15.10
   1   9  -2  133.39   28.30
   1   9  -2  200.58   19.90
  -1   9   2  175.28   18.50
   1   9  -2  200.28   15.70
   0  -9   2  560.04   28.00
   0  -9  -2  553.94   31.30
   0  -9  -2  584.34   32.70
   0  -9   2  532.25   32.00
   0   9  -2  518.85   36.70
   0   9   2  628.74   30.30
   0   9   2  558.54   25.50
   0   9  -2  588.24   32.80
   0   9  -2  564.94   28.00
   0   9  -2  564.24   36.00
  -1  -9  -2  257.47   18.10
  -1  -9  -2  236.88   25.40
   1  -9   2  267.27   20.00
   1   9   2  249.48   19.70
   1   9   2  322.07   21.60
  -1   9  -2  268.87   30.90
  -1   9  -2  247.48   29.10
  -1   9  -2  241.98   19.50
  -1   9  -2  259.77   23.10
  -2  -9  -2  772.22   41.40
  -2  -9  -2  843.72   47.30
   2   9   2  834.52   40.50
  -2   9  -2  787.12   43.90
  -2   9  -2  889.11   41.80
  -2   9  -2  814.22   31.00
  -3  -9  -2  278.27   25.20
  -3  -9  -2  390.76   44.90
  -3  -9  -2  328.27   27.10
  -3   9  -2  350.76   14.10
  -3   9  -2  337.37   34.00
  -4  -9  -2  253.47   16.60
   4  -9   2  266.17   15.20
   4  -9   2  283.57   15.90
   4  -9   2  261.17   14.70
   4  -9   2  277.07   19.20
   4   9   2  227.58   18.50
   4   9   2  238.78   21.10
  -4   9  -2  317.57   52.99
   4   9   2  266.77   25.00
   4   9   2  271.07   14.10
   4   9   2  282.47   16.10
   5  -9   2    1.90    8.40
   5  -9   2   13.20    8.00
   5  -9   2    1.40    9.20
   5   9   2   20.50   10.70
  -5   9  -2    8.60    3.10
   5   9   2   11.90    7.30
   5   9   2    3.90    9.40
   6  -9   2  178.28   12.20
   6  -9   2  185.68   13.80
   6  -9   2  178.88   13.00
  -6  -9  -2  191.98   11.90
   6  -9   2  199.18   13.00
   6   9   2  203.28   16.60
   6   9   2  184.08   20.00
  -6   9  -2  190.68   12.00
   6   9   2  199.18   17.50
   6   9   2  206.28   12.40
  -6   9  -2  205.38    9.90
   7  -9   2   47.80    7.50
   7  -9   2   51.69    9.20
  -7  -9  -2   39.30    6.00
   7  -9   2   36.60    6.30
   7  -9   2   40.60    8.10
  -7   9  -2   47.10    7.20
  -7   9  -2   56.39    5.40
   7   9   2   44.30    7.90
   7   9   2   57.39   11.80
   7   9   2   50.99    8.80
   8  -9   2   35.20    5.40
  -8  -9  -2   29.10    5.00
   8  -9   2   38.10    6.00
   8  -9   2   28.90    5.40
   8  -9   2   40.60    5.80
   8   9   2   26.90    5.80
   8   9   2   30.90    5.20
  -8   9  -2   37.60    5.40
   8   9   2   35.10    6.50
   9  -9   2   68.39    5.30
   9  -9   2   90.39    5.80
   9   9   2   79.29    7.10
 -10 -10   2   19.30    3.40
  10  10  -2   21.30    4.50
  -9 -10   2   29.70    5.20
   9 -10  -2   18.90    5.50
  -9 -10   2   19.00    3.60
   9  10  -2   21.70    5.90
  -9  10   2   19.30    3.60
   9  10  -2   19.70    6.90
   9  10  -2   17.20    5.80
   8 -10  -2  183.28   11.30
  -8 -10   2  176.98   10.60
  -8 -10   2  180.18   11.10
   8 -10  -2  178.68   14.90
   8 -10  -2  188.88   11.50
   8  10  -2  151.28   22.20
   8  10  -2  212.98   12.50
   8  10  -2  183.68   15.40
   8  10  -2  184.08   11.80
  -8  10   2  189.28    9.20
   8  10  -2  177.58   14.60
  -8  10   2  179.58    9.00
   8  10  -2  170.98   18.90
  -7 -10   2  277.37   14.20
  -7 -10   2  279.57   15.10
   7 -10  -2  294.47   17.00
   7 -10  -2  284.57   15.30
   7 -10  -2  280.57   15.30
   7  10  -2  270.47   16.00
   7  10  -2  290.27   19.80
   7  10  -2  282.47   19.80
  -7  10   2  279.27   12.80
   7  10  -2  272.77   21.10
  -7  10   2  281.47   12.60
   7  10  -2  278.17   15.80
   6 -10  -2  251.07   16.30
  -6 -10   2  252.67   12.70
   6 -10  -2  235.88   14.90
   6 -10  -2  237.18   16.60
   6 -10  -2  276.77   18.30
   6  10  -2  237.38   19.90
   6  10  -2  253.57   19.60
   6  10  -2  230.38   20.10
  -6  10   2  195.88   13.00
  -6  10   2  240.98   11.10
   6  10  -2  230.48   15.60
   5 -10  -2    1.30    5.10
   5 -10  -2   14.40    6.30
   5 -10  -2   -1.20    8.10
   5 -10  -2    6.40    4.50
  -5 -10   2    5.80    6.00
   5 -10  -2   -5.70   10.10
  -5 -10   2    5.30    3.30
   5  10  -2    2.20    6.60
  -5  10   2    6.60    2.40
   5  10  -2   -6.20    8.50
   5  10  -2    3.00   11.10
   5  10  -2    4.70    5.50
  -5  10   2    5.80    3.40
  -4 -10   2  460.95   50.19
  -4 -10   2  500.55   21.00
  -4 -10   2  514.55   38.20
  -4 -10   2  555.34   35.80
  -4  10   2  512.25   49.40
  -4  10   2  512.05   20.00
   4  10  -2  555.04   40.90
  -4  10   2  455.15   47.20
   3 -10  -2   39.90    5.00
  -3 -10   2   40.70   11.60
  -3 -10   2   42.50    5.60
  -3 -10   2   43.70   15.50
  -3  10   2   24.90   16.70
  -3  10   2   39.40    4.20
   3  10  -2   52.39   13.80
   3  10  -2   39.40   15.50
  -3  10   2   43.70   17.20
  -2 -10   2  941.91   37.00
   2 -10  -2  910.61   36.40
  -2 -10   2  962.00   47.30
  -2 -10   2  973.40   48.10
   2  10  -2 1025.20   50.29
   2  10  -2  992.40   45.10
  -2  10   2  949.71   49.20
  -2  10   2 1075.69   45.90
   1 -10  -2  147.89   23.60
  -1 -10   2  203.88   20.50
  -1 -10   2  179.18   16.60
  -1  10   2  181.18   16.30
   1  10  -2  180.18   17.30
  -1  10   2  169.78   21.00
   1  10  -2  189.48   22.20
   0 -10   2  633.44   31.50
   0 -10   2  613.24   36.60
   0 -10  -2  615.24   36.70
   0 -10  -2  585.94   38.10
   0  10  -2  649.83   36.70
   0  10   2  595.94   30.00
   0  10  -2  568.84   43.80
   0  10   2  645.94   33.90
   0  10  -2  662.63   31.70
   1 -10   2  851.11   41.60
  -1 -10  -2  871.61   47.10
  -1  10  -2  907.11   45.90
  -1  10  -2  899.21   41.90
  -1  10  -2  882.61   32.50
   1  10   2  726.63   41.40
   1  10   2  922.81   43.00
  -2 -10  -2  529.05   22.10
  -2 -10  -2  570.94   31.50
  -2 -10  -2  553.54   41.20
  -2  10  -2  556.44   37.90
  -2  10  -2  618.14   36.00
  -2  10  -2  588.34   22.10
   3 -10   2  237.18   14.10
  -3 -10  -2  285.27   48.10
  -3 -10  -2  210.48   10.80
  -3 -10  -2  181.48   26.50
   3 -10   2  211.98   13.70
   3 -10   2  236.88   21.80
  -3  10  -2  240.08   45.00
   3  10   2  217.48   12.70
  -3  10  -2  213.38   10.00
   4 -10   2  128.19   15.00
   4 -10   2  125.89   10.70
   4 -10   2  116.49   10.60
   4 -10   2  120.99   10.70
  -4  10  -2  125.29    7.10
   4  10   2  131.19   18.70
   4  10   2  113.49   15.50
   4  10   2  124.29    9.70
   4  10   2  111.09   22.90
   4  10   2  132.29   11.80
   5 -10   2   16.50    5.50
   5 -10   2    9.70    5.70
   5 -10   2   16.30    5.00
   5 -10   2   13.80    6.00
   5  10   2    9.70    7.80
  -5  10  -2   11.40    6.20
   5  10   2   23.50    5.10
  -5  10  -2   14.80    3.10
  -6 -10  -2  540.35   26.00
   6 -10   2  551.94   24.80
   6 -10   2  542.15   25.10
   6 -10   2  532.05   24.30
   6 -10   2  564.74   24.10
   6  10   2  581.54   30.90
   6  10   2  530.85   28.80
   6  10   2  471.35   29.00
  -6  10  -2  568.84   22.00
   6  10   2  522.55   23.80
  -6  10  -2  518.15   22.50
  -7 -10  -2  136.09   10.10
   7 -10   2  168.18   15.40
   7 -10   2  144.79   14.70
  -7  10  -2  138.19    7.80
   7  10   2  123.29   15.90
   7  10   2  134.69   13.70
   7  10   2  146.29   12.40
   7  10   2  116.39   14.20
  -8 -10  -2  180.08   13.30
   8 -10   2  225.88   11.90
  -8 -10  -2  199.68   11.70
   8 -10   2  207.98   10.50
   8 -10   2  220.58   12.50
   8 -10   2  220.08   11.10
   8  10   2  218.38   13.50
  -8  10  -2  209.78    9.50
   8  10   2  214.48   11.40
   8  10   2  210.38   12.20
   9 -10   2   14.90    3.00
   9  10   2   19.00    4.10
 -10 -11   2   23.30    3.40
  10  11  -2   27.50    4.50
  -9 -11   2  190.08   11.90
  -9 -11   2  160.58    8.70
   9 -11  -2  158.88    9.70
   9 -11  -2  134.29   13.20
   9  11  -2  169.38   12.00
  -9  11   2  160.18    8.70
   9  11  -2  136.49   13.70
   9  11  -2  170.38   12.10
   8 -11  -2   40.10    7.60
  -8 -11   2   51.09    8.20
  -8 -11   2   46.40    6.50
   8 -11  -2   58.99   11.90
   8 -11  -2   51.79   11.10
  -8  11   2   48.40    4.70
   8  11  -2   44.80    8.80
   8  11  -2   49.30   13.40
   8  11  -2   39.60    6.40
   8  11  -2   63.09   11.60
  -8  11   2   41.80    4.50
  -7 -11   2  117.79   10.20
  -7 -11   2  133.19   10.30
   7 -11  -2  114.89   10.20
   7 -11  -2  140.89   12.90
   7 -11  -2  115.89   10.40
   7 -11  -2  129.59   15.60
  -7  11   2  117.39    7.30
   7  11  -2  111.49   10.60
   7  11  -2  119.39   15.50
   7  11  -2  139.89   17.70
   7  11  -2  122.39   11.70
   7  11  -2   93.99   16.30
  -7  11   2  133.69    8.40
   6 -11  -2 1122.39   47.50
   6 -11  -2 1112.79   45.30
   6 -11  -2 1125.09   45.20
   6 -11  -2 1177.28   44.80
  -6 -11   2 1146.59   45.30
  -6 -11   2 1175.98   44.80
   6 -11  -2 1140.89   45.90
   6  11  -2 1159.18   46.70
  -6  11   2 1162.38   43.60
   6  11  -2 1028.60   49.40
  -6  11   2 1183.68   43.40
   6  11  -2 1204.58   53.59
   6  11  -2 1162.48   49.00
   6  11  -2 1178.48   46.10
   5 -11  -2  261.27   16.50
   5 -11  -2  323.37   18.50
   5 -11  -2  284.17   14.70
   5 -11  -2  264.47   15.10
  -5 -11   2  287.37   15.40
   5 -11  -2  272.67   16.30
  -5 -11   2  288.37   13.80
   5  11  -2  282.87   22.30
   5  11  -2  282.87   21.10
   5  11  -2  276.77   17.20
   5  11  -2  304.37   15.70
  -5  11   2  281.97   12.40
  -5  11   2  296.77   13.00
   4 -11  -2   44.90    7.10
   4 -11  -2   25.70    6.10
   4 -11  -2   35.70    6.30
  -4 -11   2   18.00   19.00
  -4 -11   2   26.30   31.00
  -4 -11   2   30.50    6.60
  -4  11   2   44.90   32.40
   4  11  -2   19.10    7.10
  -4  11   2   39.40    4.90
   4  11  -2   28.90    6.40
   4  11  -2   24.30   24.90
   4  11  -2   50.09    9.80
  -4  11   2   16.40   30.50
  -4  11   2   30.90    4.10
  -3 -11   2   24.90   13.40
  -3 -11   2   20.60    3.60
   3 -11  -2   17.70    3.10
  -3 -11   2   15.10   17.90
   3  11  -2   39.80   15.50
  -3  11   2   17.90    2.70
  -3  11   2   -4.00   19.80
  -3  11   2    8.30   19.80
  -2 -11   2   92.09    6.90
  -2 -11   2  102.89   23.00
  -2 -11   2   77.69   13.10
   2 -11  -2   96.89    5.50
  -2  11   2   99.79   16.10
   2  11  -2   81.09   18.90
   2  11  -2  113.29   25.10
  -2  11   2   81.79    6.00
  -2  11   2   94.19   19.90
   2  11  -2   80.69    7.10
   1 -11  -2 1265.77   65.29
  -1 -11   2 1258.87   56.19
   1 -11  -2 1282.97   47.80
  -1 -11   2 1321.17   70.19
  -1  11   2 1304.07   55.29
   1  11  -2 1281.27   48.00
   1  11  -2 1247.48   58.59
  -1  11   2 1303.57   60.39
   1  11  -2 1377.96   63.09
   0 -11   2   72.09   12.80
   0 -11  -2   62.69    4.90
   0 -11  -2   68.59   17.50
   0 -11   2   79.59   17.30
   0  11   2   41.90   14.50
   0  11  -2   68.69    4.80
   0  11  -2   61.99   15.90
   0  11  -2   39.50   11.40
  -1 -11  -2  356.06   15.40
  -1 -11  -2  374.06   33.80
   1 -11   2  415.86   29.10
  -1  11  -2  414.06   28.40
  -1  11  -2  375.56   15.30
  -1  11  -2  364.26   33.10
   1  11   2  402.26   31.20
  -2 -11  -2  760.32   40.80
  -2 -11  -2  793.22   53.49
  -2 -11  -2  770.12   29.70
  -2  11  -2  794.42   29.60
  -2  11  -2  740.63   45.60
  -2  11  -2  809.32   48.60
   3 -11   2  385.36   19.00
  -3 -11  -2  393.86   36.30
  -3 -11  -2  382.16   16.30
   3 -11   2  412.66   19.60
   3 -11   2  389.06   21.10
   3 -11   2  397.96   18.90
   3  11   2  405.16   19.30
   3  11   2  385.16   18.30
  -3  11  -2  375.66   49.90
   3  11   2  371.46   21.00
   4 -11   2  134.99   10.60
  -4 -11  -2  137.89    8.60
   4 -11   2  132.29   14.10
   4 -11   2  126.89   10.90
   4 -11   2  121.49   10.40
  -4  11  -2  125.99    7.10
   4  11   2  100.89   15.60
   4  11   2  126.29   15.90
   4  11   2  119.79   11.40
  -4  11  -2  116.09   10.50
   4  11   2  147.79   14.10
   4  11   2  131.39    9.70
   5 -11   2   44.30    9.10
   5 -11   2   45.50    8.90
   5 -11   2   44.60    7.90
   5 -11   2   44.70    8.10
   5 -11   2   30.80    6.30
   5  11   2   45.00    7.60
  -5  11  -2   54.99    5.30
   5  11   2   49.20   11.90
   5  11   2   25.10   10.30
   5  11   2   49.30   10.10
  -5  11  -2   40.30    7.80
   6 -11   2  274.37   16.20
  -6 -11  -2  270.47   14.10
   6 -11   2  257.27   19.90
   6 -11   2  290.77   15.60
   6 -11   2  286.67   14.90
   6 -11   2  285.37   15.20
  -6  11  -2  289.67   12.70
   6  11   2  282.97   23.00
   6  11   2  240.88   20.10
   6  11   2  292.17   19.70
   6  11   2  278.07   15.00
   7 -11   2  248.88   14.00
   7 -11   2  243.38   13.50
   7 -11   2  231.18   13.20
  -7 -11  -2  220.18   12.50
   7 -11   2  232.88   12.30
   7  11   2  236.08   12.50
   7  11   2  200.88   15.50
   7  11   2  226.88   21.10
   7  11   2  219.28   18.20
  -7  11  -2  217.28   10.50
  -8 -11  -2    8.30    5.40
   8 -11   2    6.30    4.00
  -8 -11  -2    8.20    4.30
   8 -11   2   10.50    3.40
   8 -11   2   10.40    3.10
   8  11   2    8.60    3.80
  -8  11  -2   11.60    2.50
   8  11   2   19.90    9.00
   8  11   2    7.90    4.90
  -9 -12   2   18.90    3.40
   9 -12  -2   28.90    5.00
  -9 -12   2   27.30    5.00
   9 -12  -2   24.50    4.20
  -9  12   2   27.00    4.00
   9  12  -2   27.70    5.40
   9  12  -2   29.00    7.20
   9  12  -2   28.70    5.90
  -8 -12   2  201.78   11.20
   8 -12  -2  202.38   14.30
   8 -12  -2  210.68   11.90
  -8 -12   2  207.88   11.40
   8  12  -2  194.68   17.60
   8  12  -2  202.68   11.90
   8  12  -2  236.38   15.60
   8  12  -2  230.38   16.10
  -8  12   2  211.48    9.70
   8  12  -2  207.18   12.20
   7 -12  -2  301.67   15.70
  -7 -12   2  296.57   15.60
  -7 -12   2  315.47   15.20
   7 -12  -2  311.97   15.80
   7 -12  -2  305.27   17.60
   7 -12  -2  310.27   18.80
   7  12  -2  315.57   16.40
  -7  12   2  307.37   13.40
   7  12  -2  305.87   20.60
   7  12  -2  301.47   16.80
   7  12  -2  314.17   22.20
  -6 -12   2  563.24   24.30
   6 -12  -2  561.74   24.40
   6 -12  -2  525.25   24.10
   6 -12  -2  544.45   25.80
   6 -12  -2  544.85   25.00
  -6 -12   2  573.74   23.60
   6  12  -2  548.75   28.80
   6  12  -2  571.94   25.00
   6  12  -2  486.25   29.10
   6  12  -2  544.15   25.90
  -6  12   2  549.05   21.90
   6  12  -2  590.24   28.90
  -6  12   2  537.75   22.10
  -5 -12   2   70.69    9.10
   5 -12  -2   60.39   10.70
   5 -12  -2   59.19    9.30
  -5 -12   2   63.69    6.90
   5 -12  -2   55.19    8.90
   5 -12  -2   56.49   10.40
  -5  12   2   55.19    5.60
   5  12  -2   53.59    9.10
   5  12  -2   53.09    8.00
   5  12  -2   46.00   10.00
   5  12  -2   62.49   12.10
  -5  12   2   48.80    4.90
   4 -12  -2  149.88   16.10
  -4 -12   2  180.98   10.10
   4 -12  -2  195.58   12.50
  -4 -12   2  177.38   12.50
   4 -12  -2  182.38   15.10
   4  12  -2  179.48   17.40
  -4  12   2  189.08    8.80
   4  12  -2  189.18   14.10
  -4  12   2  162.98   17.30
  -4  12   2  188.28   59.99
   4  12  -2  186.88   13.30
  -3 -12   2  297.57   13.50
  -3 -12   2  332.27   31.60
   3 -12  -2  277.87   12.70
  -3 -12   2  297.67   42.10
  -3 -12   2  288.17   18.60
   3 -12  -2  341.07   21.60
   3  12  -2  206.08   35.10
  -3  12   2  262.17   41.90
   3  12  -2  296.97   29.50
  -3  12   2  278.47   45.00
  -3  12   2  291.27   12.40
  -2 -12   2  164.28   23.30
   2 -12  -2  125.69    6.80
  -2 -12   2  114.99   27.80
  -2 -12   2  131.19    8.10
   2  12  -2  139.59    8.40
  -2  12   2  133.09    7.40
   2  12  -2  106.99   18.40
  -2  12   2  131.09   23.10
  -2  12   2  115.29   19.70
   2  12  -2  156.68   32.00
  -1 -12   2 1403.36   68.69
   1 -12  -2 1452.45   74.79
  -1 -12   2 1415.96   62.89
  -1 -12   2 1390.56   53.19
   1 -12  -2 1383.76   52.59
   1  12  -2 1406.36   52.79
   1  12  -2 1344.57   69.49
  -1  12   2 1423.76   67.89
   1  12  -2 1625.54   63.99
   0 -12  -2  183.48   31.90
   0 -12   2  195.08   33.50
   0 -12  -2  219.38    9.70
   0  12  -2  221.98   30.60
   0  12   2  220.68   30.60
   0  12  -2  252.77   25.10
   0  12  -2  223.98    9.90
   1 -12   2  284.07   30.10
  -1 -12  -2  287.17   36.40
  -1 -12  -2  281.77   12.00
  -1  12  -2  258.17   29.10
  -1  12  -2  295.17   12.00
  -1  12  -2  280.77   34.30
   1  12   2  243.88   33.60
  -2 -12  -2   24.80   25.40
  -2 -12  -2   61.09    5.40
   2 -12   2   79.09    9.50
   2 -12   2   74.39    9.40
  -2  12  -2   66.59    4.90
   2  12   2   64.49    9.80
  -2  12  -2   60.39   22.50
  -3 -12  -2 1260.37   46.90
   3 -12   2 1267.57   48.90
   3 -12   2 1155.78   48.00
   3 -12   2 1215.68   48.00
   3 -12   2 1203.08   49.20
  -3  12  -2 1255.97   46.00
   3  12   2 1287.77   48.60
   3  12   2 1193.78   48.40
   3  12   2 1205.48   47.70
   4 -12   2  594.14   26.60
   4 -12   2  634.44   27.30
   4 -12   2  612.04   28.40
  -4 -12  -2  631.54   24.80
   4 -12   2  630.94   26.50
   4  12   2  679.93   27.20
   4  12   2  585.94   27.30
   4  12   2  579.54   46.50
   4  12   2  604.84   26.10
   4  12   2  547.75   31.10
  -4  12  -2  631.34   24.20
   5 -12   2  199.18   12.90
   5 -12   2  190.38   12.70
   5 -12   2  193.88   13.80
   5 -12   2  196.58   15.60
   5 -12   2  198.28   12.40
   5  12   2  186.78   13.80
  -5  12  -2  205.28    9.80
   5  12   2  160.98   19.30
   5  12   2  199.68   12.00
   5  12   2  217.28   22.40
   6 -12   2   20.90    4.90
   6 -12   2   20.10    8.60
   6 -12   2   25.90    5.40
   6 -12   2   26.40    6.10
   6 -12   2   33.00    7.50
  -6 -12  -2   28.20    5.00
  -6  12  -2   20.60    3.30
   6  12   2   23.20    9.20
   6  12   2   28.60    7.40
   6  12   2   33.40   11.40
   6  12   2   20.40    4.80
   6  12   2   16.60    8.50
  -7 -12  -2   30.00    6.90
  -7 -12  -2   37.00    5.30
   7 -12   2   47.20    6.00
   7 -12   2   48.40    8.60
   7 -12   2   50.99    6.80
   7 -12   2   43.80    6.70
   7  12   2   44.30    6.60
   7  12   2   37.80    9.40
  -7  12  -2   47.80    4.70
   7  12   2   29.50    7.10
   8 -12   2   36.80    6.10
   8 -12   2   24.00    4.20
  -8 -12  -2   31.10    4.70
  -8 -12  -2   28.00    5.40
   8 -12   2   40.60    5.10
   8  12   2   40.20    7.60
   8  12   2   42.20    5.90
  -8  12  -2   32.00    4.10
   8  12   2   28.30    6.20
  -9 -13   2   13.70    3.40
   9 -13  -2   15.20    4.30
   9  13  -2   21.50    5.40
   9  13  -2   19.80    6.70
   9  13  -2   13.60    5.00
  -9  13   2   26.40    4.60
  -8 -13   2   69.79    6.90
  -8 -13   2   78.09    6.90
   8 -13  -2   68.79    7.40
   8  13  -2   56.99   11.30
   8  13  -2   71.69   14.00
  -8  13   2   62.29    5.00
   8  13  -2   67.69   11.00
   8  13  -2   49.20    7.90
   7 -13  -2   33.60    7.10
   7 -13  -2   52.69   10.90
  -7 -13   2   43.50    7.50
  -7 -13   2   39.60    6.90
   7 -13  -2   42.30    7.70
   7  13  -2   42.30    8.10
   7  13  -2   52.19    9.60
   7  13  -2   45.20    9.00
   7  13  -2   34.00    9.40
  -7  13   2   44.20    5.00
   6 -13  -2  963.70   39.30
  -6 -13   2  976.30   38.10
   6 -13  -2  952.70   38.60
   6 -13  -2  956.50   38.20
  -6 -13   2  973.40   37.60
   6 -13  -2  869.71   37.80
   6  13  -2 1008.90   39.00
   6  13  -2  936.01   39.60
   6  13  -2  961.50   42.20
   6  13  -2  866.11   42.70
  -6  13   2  934.71   36.10
   5 -13  -2  259.67   17.10
  -5 -13   2  275.07   13.50
   5 -13  -2  274.27   16.90
   5  13  -2  242.08   21.20
  -5  13   2  271.67   12.00
   4 -13  -2  288.97   16.10
  -4 -13   2  308.07   14.10
   4 -13  -2  303.37   15.80
  -4 -13   2  303.27   15.60
   4 -13  -2  289.37   18.50
  -4  13   2  300.37   12.80
   4  13  -2  293.97   17.50
  -4  13   2  281.77   18.30
   4  13  -2  267.97   19.90
   4  13  -2  326.37   16.80
   3 -13  -2   34.70    6.30
  -3 -13   2   40.80    6.20
   3 -13  -2   25.30    5.40
   3 -13  -2   41.60   12.70
  -3 -13   2   49.30   32.70
  -3 -13   2   48.10   12.00
   3 -13  -2   37.60    5.80
  -3 -13   2   50.09    6.30
  -3 -13   2   63.99   22.40
   3  13  -2   30.30    7.80
  -3  13   2   -2.90   31.80
   3  13  -2   35.90   25.80
  -3  13   2   35.40    4.60
   3  13  -2   36.80    7.70
   3  13  -2   56.29   10.20
  -3  13   2   42.90    8.20
  -2 -13   2  547.15   21.70
  -2 -13   2  556.04   46.20
   2 -13  -2  547.75   20.90
  -2 -13   2  476.75   37.70
   2  13  -2  518.25   21.60
  -2  13   2  517.55   20.90
   2  13  -2  541.45   39.90
  -2  13   2  539.15   49.90
   1 -13  -2  870.61   32.10
   1 -13  -2  836.42   61.29
  -1 -13   2  863.01   46.30
  -1 -13   2  853.61   32.90
  -1 -13   2  799.22   53.49
   1  13  -2  833.72   54.79
   1  13  -2  832.72   32.30
  -1  13   2  930.21   54.39
   1  13  -2  830.42   46.70
   0 -13  -2  292.07   12.50
   0 -13  -2  297.17   41.40
   0 -13   2  332.07   31.50
   0 -13   2  303.37   42.30
   0  13  -2  308.57   12.70
   0  13   2  350.76   39.10
   0  13  -2  220.88   31.70
   0  13  -2  275.27   38.00
   1 -13   2  440.06   21.80
   1 -13   2  449.66   40.10
  -1 -13  -2  427.46   17.10
  -1 -13  -2  420.16   47.80
  -1  13  -2  413.96   17.00
  -1  13  -2  388.76   38.10
   2 -13   2  160.48   15.00
  -2 -13  -2  168.58   10.80
   2 -13   2  195.38   13.10
   2 -13   2  169.88   13.50
   2 -13   2  170.88   12.20
   2 -13   2  169.78   18.80
   2  13   2  199.98   12.30
   2  13   2  175.98   12.60
  -2  13  -2  166.88   51.79
  -2  13  -2  179.68    8.60
   2  13   2  178.98   12.90
   3 -13   2   62.39    9.90
   3 -13   2   92.39   12.00
   3 -13   2   61.29    9.00
   3 -13   2   71.99    9.70
  -3 -13  -2   69.99    5.90
   3  13   2   56.89    8.10
  -3  13  -2   70.99    5.30
   3  13   2   60.09    8.10
   3  13   2   67.39    9.50
   4 -13   2  114.09   12.80
   4 -13   2  114.49   13.90
  -4 -13  -2  110.89    7.80
   4 -13   2  114.99   10.00
   4 -13   2  118.49   11.10
   4 -13   2  107.29   10.10
   4  13   2  110.19   10.40
  -4  13  -2  112.19    6.90
   4  13   2  102.79    9.40
   4  13   2   91.59   14.70
   5 -13   2  211.48   14.40
   5 -13   2  238.98   13.80
   5 -13   2  234.38   13.00
   5 -13   2  212.88   16.20
   5 -13   2  223.08   13.60
   5  13   2  186.78   18.70
  -5  13  -2  236.58   10.80
   5  13   2  238.48   13.10
   5  13   2  202.58   14.30
   5  13   2  266.87   23.60
   5  13   2  205.18   21.70
   6 -13   2    5.70    5.00
   6 -13   2    4.70    4.30
   6 -13   2    7.20    7.40
  -6 -13  -2    2.10    4.00
   6 -13   2   -1.50    4.10
   6 -13   2    3.30    4.10
   6  13   2   18.00    9.00
  -6  13  -2    1.70    2.50
   6  13   2   -1.80    7.40
   6  13   2   -0.40    4.20
   6  13   2    9.90   10.00
   6  13   2   -5.20   16.40
   7 -13   2  149.29   10.60
   7 -13   2  145.79    9.30
  -7 -13  -2  146.59   11.00
   7 -13   2  164.88    9.80
   7 -13   2  150.98    9.90
  -7 -13  -2  134.69   14.40
  -7  13  -2  149.88    7.60
   7  13   2  146.99   13.20
   7  13   2  144.79    9.20
   7  13   2  135.69   13.00
   8 -13   2    8.70    4.10
  -8 -13  -2   13.20    4.30
   8 -13   2   16.20    6.20
   8 -13   2   11.10    3.10
  -8  13  -2    8.70    2.50
   8  13   2   18.40    4.10
   9 -14  -2   73.89    7.30
   9 -14  -2   77.19    8.70
  -9 -14   2   67.79    6.20
  -9 -14   2   71.69    5.30
   9  14  -2   70.89   12.60
   9  14  -2   71.19    8.80
   9  14  -2   76.59   10.40
  -8 -14   2   77.39    6.60
  -8 -14   2   78.69    6.80
   8 -14  -2   84.19    7.20
   8  14  -2   65.69   10.20
   8  14  -2   72.09   13.20
   8  14  -2   78.39   11.10
   8  14  -2   70.79    7.70
  -8  14   2   74.39    5.30
  -7 -14   2   71.59    7.60
   7 -14  -2   59.29   11.30
  -7 -14   2   74.79    7.50
   7 -14  -2   66.89    8.00
   7 -14  -2  105.49   18.80
   7  14  -2   74.59    8.80
   7  14  -2   89.89   15.80
   7  14  -2   74.89    9.70
   7  14  -2   76.99   13.40
  -7  14   2   68.09    5.60
   6 -14  -2  228.48   13.10
   6 -14  -2  210.58   15.00
   6 -14  -2  210.38   14.20
  -6 -14   2  235.78   12.10
  -6 -14   2  215.78   13.00
   6  14  -2  217.48   15.00
   6  14  -2  224.68   18.10
   6  14  -2  239.38   14.00
   6  14  -2  176.08   18.40
  -6  14   2  213.98   10.40
  -5 -14   2  327.67   16.20
  -5 -14   2  321.37   15.40
   5 -14  -2  328.97   16.90
   5 -14  -2  321.87   18.70
   5 -14  -2  320.07   16.60
   5  14  -2  335.87   22.00
  -5  14   2  331.17   14.30
   5  14  -2  316.47   17.30
   5  14  -2  301.87   18.20
  -4 -14   2 1020.60   37.10
  -4 -14   2  872.01   40.90
   4 -14  -2  944.91   39.30
   4 -14  -2  918.51   37.70
   4 -14  -2  910.11   37.70
   4 -14  -2 1016.50   45.80
  -4 -14   2  929.11   37.40
   4  14  -2  900.71   41.00
  -4  14   2  935.91   39.00
   4  14  -2  983.70   38.60
  -4  14   2  954.40   35.70
   4  14  -2  895.11   39.30
  -3 -14   2  301.07   15.40
   3 -14  -2  296.37   18.80
  -3 -14   2  283.07   20.00
   3 -14  -2  304.47   13.60
   3 -14  -2  290.07   17.90
   3 -14  -2  315.97   15.80
   3 -14  -2  325.37   13.90
  -3 -14   2  314.77   14.20
   3  14  -2  296.87   20.10
   3  14  -2  277.07   17.90
  -3  14   2  349.77   18.60
  -3  14   2  317.57   13.10
   3  14  -2  211.68   37.80
   3  14  -2  301.87   18.60
  -2 -14   2   20.10   27.80
   2 -14  -2   71.39    9.90
  -2 -14   2   62.79    6.70
  -2 -14   2   94.29   13.10
  -2 -14   2   66.99    9.00
   2 -14  -2   63.29    6.50
   2 -14  -2   69.59    5.40
  -2 -14   2   81.79   23.30
   2  14  -2   56.79   24.90
   2  14  -2   80.69   13.10
  -2  14   2   82.49   10.20
   2  14  -2   85.89   12.90
  -2  14   2   54.59   33.60
  -1 -14   2   56.59    9.00
   1 -14  -2   64.69    6.60
   1 -14  -2   58.49    4.80
  -1 -14   2   52.99   21.40
  -1 -14   2   55.49   27.00
  -1 -14   2   67.39    8.90
  -1 -14   2   43.60    7.40
  -1  14   2   63.49    9.30
   1  14  -2   87.89   22.60
   1  14  -2   52.79    5.60
  -1  14   2   33.60   28.60
   1  14  -2   57.59   12.40
  -1  14   2   58.79    9.50
   0 -14   2   83.89   31.60
   0 -14   2   82.29   12.30
   0 -14   2   92.69   23.50
   0 -14  -2   72.69    7.50
   0 -14  -2   68.69    5.30
   0  14  -2   95.49   24.00
   0  14   2   67.89   29.20
   0  14   2   64.69    9.20
   0  14   2   84.39   11.50
   0  14   2   63.09    9.40
   0  14  -2   72.09    5.40
   1 -14   2  125.79   11.10
   1 -14   2  102.99   14.50
   1 -14   2   97.99   13.50
  -1 -14  -2  123.09    7.30
   1 -14   2  127.79   14.90
  -1 -14  -2  130.49    9.40
   1 -14   2  126.19   14.40
   1  14   2  140.79   11.50
  -1  14  -2  133.69   29.00
  -1  14  -2  133.99    6.90
   1  14   2  108.99   11.40
   1  14   2  136.19   10.80
   2 -14   2  108.29   11.30
  -2 -14  -2  109.09    6.60
   2 -14   2   98.29   15.70
   2 -14   2  100.89   10.20
   2 -14   2  104.29   12.30
   2 -14   2  107.09   11.40
   2  14   2   92.89   12.60
   2  14   2  113.79   10.30
   2  14   2  120.69   11.00
   2  14   2  101.79   10.10
  -2  14  -2  111.19    6.50
  -3 -14  -2  275.47   16.70
   3 -14   2  260.47   22.00
   3 -14   2  319.97   16.40
   3 -14   2  305.57   16.20
  -3 -14  -2  314.47   13.70
   3 -14   2  303.87   17.80
   3 -14   2  317.27   16.20
   3  14   2  277.27   17.10
  -3  14  -2  320.47   13.40
   3  14   2  317.77   15.50
   3  14   2  335.17   16.70
   4 -14   2  201.28   12.90
   4 -14   2  196.48   12.60
  -4 -14  -2  192.98   14.30
   4 -14   2  221.18   13.20
  -4 -14  -2  212.28   10.80
   4 -14   2  197.18   15.20
   4 -14   2  211.48   13.60
   4  14   2  205.18   13.30
  -4  14  -2  208.88   10.00
   4  14   2  180.88   17.60
   4  14   2  194.78   14.80
   4  14   2  210.48   12.30
   5 -14   2   15.50    6.90
   5 -14   2   16.50    5.30
   5 -14   2    8.00    5.10
   5 -14   2   12.80    4.70
   5 -14   2   10.30    4.80
  -5 -14  -2   25.30    7.20
   5  14   2   10.10    4.60
   5  14   2   17.80    5.90
   5  14   2   32.30   14.20
   5  14   2    8.90    8.80
   6 -14   2  120.09   18.60
   6 -14   2  131.69   13.30
  -6 -14  -2  124.69    9.10
   6 -14   2  135.49    9.90
  -6 -14  -2  133.49   11.10
   6 -14   2  135.39   11.00
   6 -14   2  146.19   10.10
   6  14   2  135.29   15.70
   6  14   2  118.59   11.60
  -6  14  -2  139.49    7.50
   6  14   2  136.19    9.50
   7 -14   2   79.39    7.10
   7 -14   2   86.19    7.30
   7 -14   2   76.69    7.40
   7 -14   2   70.09    7.70
  -7 -14  -2   86.79    8.30
  -7  14  -2   72.49    5.30
   7  14   2   63.89   10.20
   7  14   2   76.29    6.60
  -8 -14  -2   33.40    5.90
   8 -14   2   40.30    5.60
   8  14   2   42.60    7.30
   8  14   2   34.50    5.00
  -8  14  -2   38.30    6.20
  -9 -15   2   89.89    5.40
   9 -15  -2   80.79    6.60
   9 -15  -2   86.19    6.40
   9  15  -2   96.79    9.60
   9  15  -2  103.09    8.40
   8 -15  -2   18.70    3.70
  -8 -15   2   23.40    3.90
  -8 -15   2   35.00    5.10
   8 -15  -2   26.00    4.50
   8  15  -2   21.60    5.90
  -8  15   2   21.20    3.20
   8  15  -2   33.90    6.40
   8  15  -2   25.20    7.30
   7 -15  -2  132.99   11.50
   7 -15  -2  128.49   10.30
   7 -15  -2  112.39   12.60
  -7 -15   2  132.49    8.60
  -7  15   2  108.19    7.00
   7  15  -2  145.09   11.60
   7  15  -2  129.89   22.50
  -6 -15   2   28.00    5.40
  -6 -15   2   39.00    6.50
   6 -15  -2   54.19   11.20
   6 -15  -2   30.20    5.70
   6 -15  -2   34.90    6.30
   6  15  -2   37.70    7.10
  -6  15   2   39.40    5.10
   6  15  -2   33.90    8.10
   6  15  -2   24.30    9.20
   6  15  -2   35.20    6.30
   5 -15  -2 1077.39   43.90
   5 -15  -2 1120.39   44.70
   5 -15  -2 1108.29   43.80
  -5 -15   2 1142.69   43.50
  -5 -15   2 1149.69   43.10
   5  15  -2 1086.09   45.30
   5  15  -2 1032.60   47.50
  -5  15   2 1122.59   41.60
   5  15  -2 1127.29   44.40
  -5  15   2 1061.69   45.60
   4 -15  -2  162.68   14.80
  -4 -15   2  197.98   19.00
   4 -15  -2  205.68   16.70
  -4 -15   2  220.18   15.20
   4 -15  -2  179.98   13.90
  -4 -15   2  181.18   10.80
  -4  15   2  195.78    9.50
   4  15  -2  187.08   22.10
   4  15  -2  169.78   17.60
  -4  15   2  187.28   19.10
  -3 -15   2  496.95   24.60
   3 -15  -2  503.85   22.30
   3 -15  -2  481.25   21.00
  -3 -15   2  496.05   20.90
   3 -15  -2  515.65   20.30
   3 -15  -2  466.75   23.60
  -3 -15   2  497.65   21.60
   3  15  -2  491.85   25.80
   3  15  -2  480.55   24.20
  -3  15   2  502.85   23.10
  -3  15   2  491.95   19.80
   3  15  -2  500.45   24.20
   2 -15  -2  211.88   10.50
  -2 -15   2  187.68   11.90
  -2 -15   2  199.78   10.80
   2 -15  -2  209.88    9.80
  -2 -15   2  217.68   16.00
   2 -15  -2  200.58   12.90
  -2  15   2  122.29   62.19
  -2  15   2  222.38   13.50
   2  15  -2  165.48   50.69
   2  15  -2  198.98   15.70
   2  15  -2  199.08   15.90
  -1 -15   2    0.50    5.10
  -1 -15   2    3.20    4.40
  -1 -15   2   36.70   26.70
   1 -15  -2    3.90    2.40
   1 -15  -2    0.90    3.40
   1 -15  -2   11.40    6.30
  -1 -15   2    0.90    7.20
  -1 -15   2    4.10    9.40
   1  15  -2   11.80   31.10
  -1  15   2   -3.10    5.50
  -1  15   2   -7.50    8.70
  -1  15   2   -1.40    5.70
   1  15  -2   10.10    6.80
   1  15  -2   13.00    8.40
  -1  15   2    1.70   39.40
   1  15  -2    4.40    3.20
   0 -15   2   69.79   13.70
   0 -15   2   75.39   11.00
   0 -15  -2   83.29    7.60
   0 -15   2  108.59   12.70
   0 -15   2  120.09   15.10
   0 -15  -2   95.29    6.20
   0 -15  -2   78.69   10.30
   0 -15   2   22.50   29.90
   0  15   2   98.29   11.60
   0  15  -2  110.89   16.90
   0  15  -2  102.69    6.30
   0  15   2   99.09    9.50
   0  15   2   98.99    9.80
  -1 -15  -2  347.57   14.00
  -1 -15  -2  326.17   15.20
   1 -15   2  297.47   18.50
   1 -15   2  321.57   17.10
   1 -15   2  340.47   19.30
   1 -15   2  305.27   18.90
   1 -15   2  317.97   18.50
   1  15   2  304.47   17.60
   1  15   2  352.36   16.90
  -1  15  -2  331.57   13.90
   1  15   2  323.67   16.40
   1  15   2  346.27   17.40
  -2 -15  -2  146.59    8.10
   2 -15   2  161.78   12.60
  -2 -15  -2  142.69   10.10
   2 -15   2  146.69   12.50
   2 -15   2  137.29   15.70
   2 -15   2  153.78   13.00
   2 -15   2  148.19   11.50
   2 -15   2  120.59   13.60
   2  15   2  131.89   10.90
   2  15   2  159.18   11.60
   2  15   2  158.18   12.70
   2  15   2  148.49   11.60
  -2  15  -2  144.49    7.70
   3 -15   2  392.46   19.30
  -3 -15  -2  426.56   17.10
   3 -15   2  399.86   19.50
   3 -15   2  367.96   23.60
  -3 -15  -2  432.16   20.50
   3 -15   2  339.27   22.00
   3 -15   2  385.16   20.60
   3  15   2  413.56   19.70
  -3  15  -2  400.96   16.60
   3  15   2  366.26   19.50
   4 -15   2   66.29    8.90
   4 -15   2   56.09    8.20
   4 -15   2   63.69    8.90
  -4 -15  -2   58.19   10.00
   4 -15   2   61.39    8.80
  -4 -15  -2   56.99    6.40
  -4  15  -2   58.89    5.40
   4  15   2   65.29   11.50
   4  15   2   55.59    8.20
   4  15   2   46.80    9.50
   5 -15   2   17.10    4.90
   5 -15   2   10.60    4.50
   5 -15   2    3.20    6.20
  -5 -15  -2   21.80    6.00
   5 -15   2    6.30    5.40
   5 -15   2   19.70    5.10
  -5 -15  -2    9.80    3.60
   5  15   2   10.40    4.40
   5  15   2   14.00    8.30
  -5  15  -2    8.50    2.70
   5  15   2   17.30    5.90
  -6 -15  -2    3.30    4.90
   6 -15   2    4.50    4.30
   6 -15   2    5.30    5.00
  -6 -15  -2    8.80    3.80
   6 -15   2    9.40    4.30
   6 -15   2   13.60    6.50
   6 -15   2   14.60    7.80
   6 -15   2   10.20    4.80
   6  15   2    6.00    5.80
  -6  15  -2    7.30    2.60
   6  15   2   12.90    4.20
   6  15   2    4.30    8.00
  -7 -15  -2   75.19    7.40
   7 -15   2   63.09    7.10
   7 -15   2   74.89    6.80
   7 -15   2   77.29    6.60
  -7 -15  -2   70.89    7.10
   7  15   2   74.89    6.40
  -7  15  -2   77.69    6.50
   7  15   2   75.39    9.90
   8 -15   2   -0.80    2.50
   8 -15   2   -3.60    2.90
   8  15   2   -2.70    4.20
  -9 -16   2  131.49    5.90
   9 -16  -2  108.19    7.10
   9 -16  -2  137.19    7.10
   8 -16  -2   21.00    3.90
  -8 -16   2   18.90    3.70
  -8 -16   2   18.60    3.40
   8 -16  -2   14.30    3.60
   8  16  -2   17.90    6.20
  -8  16   2   16.40    3.80
   8  16  -2   14.70    6.40
   8  16  -2   15.40    5.70
   7 -16  -2   76.29    7.70
  -7 -16   2   78.39    6.70
   7 -16  -2   69.29    9.90
  -7 -16   2   65.59    6.80
  -7  16   2   65.99    5.70
   7  16  -2   50.59    8.10
   7  16  -2   74.69    8.80
   7  16  -2   59.19   10.20
   7  16  -2   76.69    7.70
  -6 -16   2   49.70    6.90
  -6 -16   2   60.69    7.20
   6 -16  -2   51.59    8.70
   6 -16  -2   45.10    7.60
   6 -16  -2   46.70    8.50
   6  16  -2   40.60    8.30
   6  16  -2   77.19   12.90
   6  16  -2   44.30    7.20
  -6  16   2   52.79    5.50
   5 -16  -2   74.19    9.70
  -5 -16   2   80.59    8.50
  -5 -16   2   70.79    7.70
   5 -16  -2   71.49   12.40
   5 -16  -2   85.69    9.80
   5  16  -2   74.29    9.80
  -5  16   2   89.19   17.20
   5  16  -2   94.09   11.60
   5  16  -2   62.79   10.40
  -5  16   2   79.69    6.20
   4 -16  -2  217.58   13.70
  -4 -16   2  213.08   11.80
   4 -16  -2  220.58   13.60
  -4 -16   2  221.38   12.50
  -4 -16   2  240.18   19.00
   4 -16  -2  219.58   15.50
   4  16  -2  223.88   18.10
   4  16  -2  197.38   14.90
  -4  16   2  229.88   10.50
  -4  16   2  218.18   15.60
   4  16  -2  207.38   14.60
  -3 -16   2  271.37   13.80
  -3 -16   2  284.97   13.10
   3 -16  -2  261.27   15.60
   3 -16  -2  235.48   17.00
  -3 -16   2  240.58   16.90
   3 -16  -2  236.88   12.30
  -3  16   2  242.58   15.30
   3  16  -2  267.67   16.80
   3  16  -2  276.87   18.70
  -3  16   2  265.27   12.10
   3  16  -2  257.77   17.50
   2 -16  -2  194.18   10.10
  -2 -16   2  194.98   11.50
  -2 -16   2  204.88   15.10
   2 -16  -2  200.28    9.80
  -2 -16   2  203.18   10.90
   2 -16  -2  162.38   13.20
   2  16  -2  199.28   15.80
  -2  16   2  205.38   13.50
   2  16  -2  203.48   15.50
   1 -16  -2  595.84   26.70
   1 -16  -2  603.54   24.20
   1 -16  -2  613.44   23.90
  -1 -16   2  635.14   25.00
  -1 -16   2  602.14   25.00
  -1 -16   2  635.14   27.60
  -1 -16   2  596.54   31.10
  -1  16   2  585.84   27.70
  -1  16   2  600.74   26.00
   1  16  -2  618.84   28.70
   1  16  -2  576.04   24.10
   1  16  -2  595.54   27.50
   0 -16  -2   11.00    8.60
   0 -16  -2   -1.20    2.30
   0 -16   2    7.90    6.90
   0 -16  -2   -3.10    3.50
   0 -16   2   -1.20    7.80
   0 -16   2    7.20    8.20
   0  16   2   -4.00    4.80
   0  16  -2    0.10    2.80
   0  16  -2   -4.70    9.50
   0  16   2   -2.30    6.70
   0  16   2   -6.70    5.10
   1 -16   2   60.59    9.00
   1 -16   2   45.30    8.20
   1 -16   2   42.60    7.50
   1 -16   2   44.60    8.20
   1 -16   2   34.50    8.60
  -1 -16  -2   48.90    6.80
  -1 -16  -2   52.19    5.20
   1  16   2   49.99    8.90
   1  16   2   55.79    9.50
  -1  16  -2   43.70    5.00
   1  16   2   46.00    7.70
   1  16   2   42.80    6.80
  -2 -16  -2  235.38   10.90
   2 -16   2  223.98   15.20
   2 -16   2  198.38   16.50
   2 -16   2  217.88   14.50
  -2 -16  -2  216.98   12.30
   2 -16   2  219.68   16.80
   2  16   2  203.78   13.30
   2  16   2  216.58   16.60
  -2  16  -2  239.98   13.20
   3 -16   2   60.19   11.20
   3 -16   2   83.39   15.70
   3 -16   2   79.49   11.20
   3 -16   2   87.39   10.10
  -3 -16  -2   75.79    6.80
  -3 -16  -2   99.89    9.40
  -3 -16  -2   78.29   13.20
   3 -16   2   75.89    9.30
   3 -16   2  106.49   17.30
   3  16   2   75.19    9.00
   3  16   2   82.39    9.80
   3  16   2   90.09   11.20
  -3  16  -2   81.79    6.00
   4 -16   2  188.68   13.60
   4 -16   2  203.08   13.00
   4 -16   2  187.58   14.20
  -4 -16  -2  198.18   10.50
   4 -16   2  203.58   12.70
   4 -16   2  190.38   14.00
  -4 -16  -2  187.18   12.70
   4  16   2  195.38   12.10
   4  16   2  185.58   17.60
   4  16   2  177.28   13.90
   4  16   2  173.38   13.00
  -4  16  -2  210.98    9.80
  -5 -16  -2   23.10    4.00
  -5 -16  -2   31.90    5.60
   5 -16   2   25.80    5.80
   5 -16   2   30.90    7.20
   5 -16   2   20.90    6.10
   5 -16   2   28.10    5.40
   5 -16   2   18.50    5.50
   5  16   2   29.20    8.80
   5  16   2   24.60    5.20
  -5  16  -2   29.20    4.60
   5  16   2   26.20    5.70
   6 -16   2   45.90    7.10
   6 -16   2   44.60    7.40
  -6 -16  -2   39.50    6.00
   6 -16   2   31.10    6.40
  -6 -16  -2   38.20    7.10
   6 -16   2   41.30    6.70
   6  16   2   37.40    8.70
   6  16   2   40.00    6.00
  -6  16  -2   42.00    4.40
   7 -16   2  128.49    8.30
  -7 -16  -2  144.69    9.60
   7 -16   2  124.09    7.70
  -7  16  -2  132.09    6.70
   7  16   2  127.39    7.70
   7  16   2  124.19   10.90
  -8 -17   2   17.20    3.70
   8 -17  -2   25.20    3.70
   8 -17  -2   21.60    3.70
  -8 -17   2   24.80    4.10
   8  17  -2   43.60    9.20
   8  17  -2   19.10    7.30
   8  17  -2   26.80    6.70
   7 -17  -2   19.00    5.50
  -7 -17   2   35.40    5.30
  -7 -17   2   24.40    4.20
   7 -17  -2   29.40    4.70
   7  17  -2   24.00    7.80
   7  17  -2   23.60    7.80
   7  17  -2   28.50    5.20
   6 -17  -2   23.50    5.30
  -6 -17   2   20.00    4.20
  -6 -17   2   26.70    4.60
   6 -17  -2   16.90    5.00
   6  17  -2   28.90    7.80
  -6  17   2   17.40    3.50
   6  17  -2   17.20    5.00
   6  17  -2   19.70    8.60
   6  17  -2   22.70    6.10
  -5 -17   2  116.99    9.20
   5 -17  -2  121.09   10.80
   5 -17  -2  118.79   10.50
  -5 -17   2  123.19    9.90
   5  17  -2  118.49   11.90
  -5  17   2  123.59    7.80
   5  17  -2  128.99   15.50
  -5  17   2  135.09   15.20
   5  17  -2  126.29   10.90
  -4 -17   2  473.95   19.80
   4 -17  -2  454.15   21.20
   4 -17  -2  438.76   22.00
   4 -17  -2  443.46   21.30
  -4 -17   2  468.15   20.10
  -4 -17   2  430.06   24.50
  -4  17   2  418.36   22.00
   4  17  -2  464.25   24.80
   4  17  -2  483.05   21.90
   4  17  -2  445.86   22.70
  -4  17   2  437.96   18.50
   3 -17  -2  400.76   17.30
  -3 -17   2  404.36   18.00
  -3 -17   2  402.86   18.30
   3 -17  -2  432.06   19.80
   3 -17  -2  413.36   19.50
  -3 -17   2  399.36   21.60
   3  17  -2  398.46   21.30
   3  17  -2  420.16   22.70
  -3  17   2  421.76   20.30
   3  17  -2  351.36   22.50
   2 -17  -2   18.70    7.20
   2 -17  -2   16.00    3.60
   2 -17  -2   14.60    4.90
  -2 -17   2   16.90    7.80
  -2 -17   2   19.10    5.10
  -2 -17   2   20.90    4.40
  -2  17   2   12.50    6.40
   2  17  -2   16.20    7.80
   2  17  -2   21.20   10.70
   1 -17  -2  354.36   15.50
  -1 -17   2  353.16   16.40
   1 -17  -2  350.86   18.50
   1 -17  -2  360.16   15.20
  -1 -17   2  326.77   19.20
  -1 -17   2  323.77   23.10
  -1  17   2  362.56   19.80
   1  17  -2  335.67   15.70
  -1  17   2  371.06   17.80
   1  17  -2  379.46   20.80
   1  17  -2  354.36   19.20
   0 -17   2  170.78   14.10
   0 -17  -2  190.48    9.40
   0 -17  -2  159.18   16.40
   0 -17   2  161.78   16.50
   0 -17   2  201.98   16.90
   0 -17  -2  191.58   10.00
   0  17  -2  186.98    9.70
   0  17   2  186.78   11.90
   0  17   2  177.48   13.50
   0  17  -2  193.58   17.10
   1 -17   2  171.18   15.40
   1 -17   2  210.58   15.50
  -1 -17  -2  206.38   10.30
  -1  17  -2  201.08   13.70
   1  17   2  197.48   14.80
  -1  17  -2  165.18   19.50
  -2 -17  -2   17.50    4.60
   2 -17   2   14.30    6.90
   2 -17   2   14.00    6.30
   2 -17   2   21.10    7.60
  -2 -17  -2   18.60    3.40
   2 -17   2   14.60    7.60
   2 -17   2   14.90    6.20
   2 -17   2   14.60    5.50
   2  17   2   13.40    5.80
   2  17   2   12.90    5.70
   2  17   2   27.10    5.90
  -2  17  -2   15.70    3.10
   3 -17   2  270.07   15.30
   3 -17   2  273.47   16.10
   3 -17   2  258.57   16.40
  -3 -17  -2  263.07   13.80
   3 -17   2  285.77   19.00
  -3 -17  -2  266.97   12.80
   3 -17   2  262.37   15.10
  -3 -17  -2  286.77   16.80
   3 -17   2  251.17   16.00
   3  17   2  247.68   15.30
   3  17   2  261.77   15.60
   3  17   2  271.37   14.50
  -3  17  -2  267.07   12.10
  -4 -17  -2   12.30    4.90
   4 -17   2   18.40    6.20
   4 -17   2   19.40    5.80
   4 -17   2   22.20    5.30
   4 -17   2   20.00    6.10
   4  17   2   17.50    5.30
   4  17   2   13.60    6.30
  -4  17  -2   14.50    3.00
   4  17   2   17.30    5.00
   4  17   2   19.50    7.50
   5 -17   2   21.00    5.50
  -5 -17  -2   24.70    4.10
   5 -17   2   23.20    5.90
   5 -17   2   26.10    4.90
   5 -17   2   36.50    7.60
   5  17   2   33.80    6.80
   5  17   2   21.90    8.00
  -5  17  -2   30.60    4.50
   6 -17   2   47.60    6.30
   6 -17   2   35.10    6.30
  -6 -17  -2   28.50    4.60
   6 -17   2   17.20    7.20
   6 -17   2   33.80    6.10
  -6 -17  -2   40.20    5.80
   6 -17   2   39.60    8.10
   6 -17   2   34.00    5.20
   6  17   2   26.70    7.80
   6  17   2   34.50    5.60
  -6  17  -2   37.90    4.30
  -7 -17  -2   90.19    7.10
  -7 -17  -2   99.89    6.80
   7 -17   2  109.09    8.20
   7 -17   2   95.49    6.60
   7  17   2   98.59    6.30
  -7  17  -2   94.29    5.70
   7  17   2   91.49    8.70
  -8 -18   2    9.40    2.60
   8 -18  -2   13.80    3.30
   8 -18  -2    8.90    3.40
   8  18  -2    2.00    5.90
   8  18  -2   18.80    5.50
   8  18  -2   10.30    6.70
   7 -18  -2   23.60    5.30
   7 -18  -2   21.90    4.20
  -7 -18   2   17.60    3.40
   7  18  -2   23.70    6.00
   7  18  -2   17.10    4.70
   7  18  -2    9.80    6.80
   7  18  -2   17.70    6.20
  -6 -18   2   10.70    4.00
  -6 -18   2    4.60    3.80
   6 -18  -2   11.10    4.70
   6 -18  -2   -4.30    4.40
   6  18  -2    2.60    7.50
   6  18  -2   12.30    6.70
   6  18  -2    7.20    4.50
  -6  18   2    7.20    3.80
   6  18  -2   12.70    6.00
  -5 -18   2  393.36   17.90
  -5 -18   2  396.96   18.10
   5 -18  -2  405.46   19.20
   5 -18  -2  417.76   19.20
   5  18  -2  389.76   20.40
  -5  18   2  408.06   21.60
   5  18  -2  428.06   23.60
   5  18  -2  407.76   19.40
  -5  18   2  377.76   16.90
  -4 -18   2  180.18   12.80
  -4 -18   2  181.48   10.50
   4 -18  -2  161.68   13.00
  -4 -18   2  148.09   19.60
   4 -18  -2  168.38   12.40
   4 -18  -2  143.59   13.50
   4  18  -2  162.28   12.80
   4  18  -2  173.48   16.30
   4  18  -2  169.08   13.50
  -4  18   2  173.48   15.50
  -3 -18   2   54.49    7.40
   3 -18  -2   59.59    9.20
  -3 -18   2   48.10    8.30
   3 -18  -2   51.19    7.50
  -3 -18   2   53.29    7.10
   3 -18  -2   39.80    6.50
  -3  18   2   38.80    7.00
   3  18  -2   46.70    8.90
   3  18  -2   31.90    8.40
   3  18  -2   37.50    7.60
  -2 -18   2  335.37   18.90
   2 -18  -2  330.87   14.60
  -2 -18   2  335.57   15.50
  -2 -18   2  325.67   15.60
   2 -18  -2  329.97   14.70
   2 -18  -2  315.37   17.40
  -2  18   2  336.57   17.40
   2  18  -2  340.17   19.30
   2  18  -2  315.97   19.50
   1 -18  -2   95.89   11.30
   1 -18  -2  103.59    7.50
  -1 -18   2   91.49   12.00
  -1 -18   2  129.39   10.00
   1 -18  -2  102.59    7.20
  -1  18   2   93.59   10.00
   1  18  -2  102.69   11.90
   1  18  -2   87.99   13.10
  -1  18   2  111.29   16.10
   0 -18   2   61.79   11.30
   0 -18   2   55.79    8.90
   0 -18  -2   57.89    5.80
   0 -18  -2   62.39    6.70
   0  18   2   49.30    8.50
   0  18   2   55.29   10.30
   0  18  -2   50.89   10.40
   0  18  -2   70.99   15.20
   0  18  -2   52.29    6.60
  -1 -18  -2   63.29    6.00
  -1 -18  -2   52.89    7.20
   1 -18   2   87.29   13.80
   1 -18   2   64.59    8.90
   1 -18   2   48.70    8.00
  -1  18  -2   63.09    6.00
   1  18   2   62.69    9.60
   1  18   2   64.29    9.50
  -1  18  -2   69.99   11.50
  -2 -18  -2  162.08   12.50
   2 -18   2  164.08   14.50
   2 -18   2  148.39   12.90
   2 -18   2  171.68   13.80
  -2 -18  -2  166.98    9.20
  -2 -18  -2  153.48    9.90
   2 -18   2  152.38   13.70
   2  18   2  150.58   11.90
   2  18   2  157.68   12.10
   2  18   2  141.09   12.20
  -2  18  -2  165.28    8.80
   3 -18   2   10.90    5.70
  -3 -18  -2   13.60    4.40
   3 -18   2   11.30    6.60
   3 -18   2   10.80    5.10
  -3 -18  -2    9.50    3.70
  -3 -18  -2   25.30    7.40
   3 -18   2   -7.50    8.10
   3 -18   2   13.90    7.20
   3 -18   2    5.20    5.90
  -3  18  -2    7.80    3.10
   3  18   2   -0.50    5.50
   3  18   2   11.20    5.30
   3  18   2   20.20    5.40
   4 -18   2   19.30    4.90
   4 -18   2   11.90    5.50
  -4 -18  -2   26.60    4.90
  -4 -18  -2   21.40    3.90
   4 -18   2   21.70    5.30
   4 -18   2   23.30    5.80
   4 -18   2   18.90    6.90
   4  18   2   14.70    4.90
  -4  18  -2   26.00    4.50
   4  18   2   37.40    6.60
   4  18   2   20.60    5.30
   4  18   2   14.40    7.30
   5 -18   2   10.50    5.20
   5 -18   2   14.30    5.00
  -5 -18  -2   17.50    4.50
   5 -18   2   14.20    4.50
   5 -18   2   11.00    6.70
   5  18   2   25.10    5.60
   5  18   2    8.10    7.20
  -5  18  -2   22.20    4.10
   6 -18   2   59.09    6.40
  -6 -18  -2   64.69    6.30
   6 -18   2   58.49    6.70
  -6 -18  -2   62.79    6.30
   6 -18   2   58.69    6.10
   6 -18   2   56.49    8.30
   6  18   2   62.49    5.90
   6  18   2   56.89    9.90
  -6  18  -2   57.29    6.40
   7 -18   2   -4.10    2.90
  -7 -18  -2    1.20    2.80
   7  18   2    0.30    2.60
   7  18   2   -2.30    4.50
  -8 -19   2    9.60    2.50
   8 -19  -2   13.80    3.30
   8 -19  -2    9.80    2.80
  -7 -19   2   88.59    8.00
   7 -19  -2  101.69    7.70
   7 -19  -2   95.59    7.50
   7 -19  -2  123.39    9.10
  -7 -19   2  107.69    6.50
   7  19  -2  108.99   11.60
   7  19  -2  106.39   10.00
   7  19  -2  104.39   10.10
  -6 -19   2   75.09    7.20
   6 -19  -2   77.09    8.80
  -6 -19   2   74.09    6.30
   6 -19  -2   69.19    7.80
   6  19  -2   80.49   11.80
   6  19  -2   68.99   12.40
   6  19  -2   64.69    8.60
   5 -19  -2   84.89    8.90
  -5 -19   2   89.99    8.10
  -5 -19   2   96.69    7.50
   5 -19  -2  105.69   16.00
  -5  19   2   80.69   12.50
   5  19  -2   83.39   10.50
   5  19  -2   83.59   10.20
   5  19  -2   86.39   13.60
  -4 -19   2  347.47   15.70
  -4 -19   2  329.67   15.50
   4 -19  -2  344.07   18.20
  -4 -19   2  316.57   20.20
   4 -19  -2  325.07   16.70
   4 -19  -2  332.27   17.80
   4  19  -2  330.37   17.70
   4  19  -2  316.97   20.40
  -4  19   2  336.87   18.10
   4  19  -2  319.67   18.40
   3 -19  -2   79.09   11.30
  -3 -19   2   51.89    8.30
  -3 -19   2   79.29    7.60
   3 -19  -2   82.49    9.60
  -3 -19   2   65.89   11.60
  -3  19   2   76.69   10.40
   3  19  -2   84.19   11.50
   3  19  -2   59.49   12.20
   2 -19  -2  154.18   11.20
  -2 -19   2  172.18   10.00
  -2 -19   2  148.39   11.20
   2 -19  -2  153.38    9.00
   2 -19  -2  143.19   11.90
  -2 -19   2  141.59   13.30
   2 -19  -2  156.58    9.70
   2  19  -2  171.08   13.90
   2  19  -2  159.58   14.30
  -2  19   2  156.48   11.60
   1 -19  -2   45.30    5.90
  -1 -19   2   36.70   10.10
  -1 -19   2   26.40    5.70
  -1 -19   2   33.60    7.40
   1 -19  -2   38.10    5.70
   1 -19  -2   33.20    6.90
   1 -19  -2   54.09    8.40
  -1  19   2   43.10    8.40
  -1  19   2   25.50    8.10
   1  19  -2   33.20    7.10
   1  19  -2   43.20    8.50
   0 -19   2   37.90    7.90
   0 -19   2   25.40    6.70
   0 -19  -2   32.10    5.70
   0 -19  -2   37.00    9.10
   0 -19  -2   28.60    5.30
   0  19   2   31.30    7.20
   0  19  -2   27.60    8.60
   0  19  -2   39.30    7.10
   0  19   2   31.80    6.10
   0  19  -2   33.80    6.80
   1 -19   2  209.68   18.20
   1 -19   2  241.18   16.10
   1 -19   2  236.88   16.30
  -1 -19  -2  265.07   14.70
  -1 -19  -2  257.77   12.50
  -1 -19  -2  255.47   12.10
   1  19   2  250.97   15.10
   1  19   2  252.17   14.60
  -1  19  -2  254.77   20.30
  -1  19  -2  266.07   12.00
   2 -19   2  153.98   15.60
  -2 -19  -2  195.28   10.10
  -2 -19  -2  183.98   12.70
  -2 -19  -2  180.18   10.80
   2 -19   2  175.28   14.00
   2 -19   2  190.88   27.90
   2 -19   2  167.38   16.10
  -2  19  -2  202.48    9.70
   2  19   2  179.78   12.70
   2  19   2  182.98   13.70
   2  19   2  202.88   13.10
   3 -19   2   85.69   13.20
   3 -19   2   87.79   10.80
   3 -19   2   63.09    9.90
  -3 -19  -2   78.09    7.40
   3 -19   2   79.59   11.60
   3 -19   2   73.89   13.40
  -3 -19  -2   73.49    8.80
  -3  19  -2   73.39    6.20
   3  19   2   90.99    9.80
   3  19   2   87.39    9.70
   3  19   2   64.39    9.60
   4 -19   2  194.78   12.40
   4 -19   2  199.78   13.10
   4 -19   2  206.38   13.40
  -4 -19  -2  209.88   14.00
  -4 -19  -2  195.18   10.50
  -4  19  -2  193.28    9.70
   4  19   2  216.48   13.00
   4  19   2  204.68   12.50
   4  19   2  212.88   15.60
   4  19   2  192.68   17.10
   5 -19   2   19.30    5.40
  -5 -19  -2   18.40    3.70
   5 -19   2   20.00    5.20
  -5 -19  -2   30.00    5.70
   5 -19   2   21.90    4.50
   5 -19   2   24.60    5.10
   5 -19   2   32.30    6.60
  -5  19  -2   17.70    2.90
   5  19   2   26.10    7.40
   5  19   2   21.70    4.10
  -6 -19  -2    8.60    3.30
  -6 -19  -2   10.00    3.30
   6 -19   2   14.60    8.00
   6 -19   2   15.10    3.80
  -6  19  -2    7.20    2.60
   6  19   2    9.00    3.10
   6  19   2   11.20    5.30
   7 -19   2   27.70    4.90
   7  19   2   31.80    7.40
  -7 -20   2   78.09    5.70
   7 -20  -2   80.59    6.70
   7 -20  -2  100.59    8.30
   7 -20  -2   86.69    6.90
   7  20  -2  100.79   14.60
   7  20  -2   86.69   11.50
   6 -20  -2   84.99    8.30
   6 -20  -2   83.09    7.90
  -6 -20   2   95.59    6.40
  -6 -20   2   88.09    9.80
   6  20  -2   82.59   12.10
   6  20  -2   91.29    8.20
   6  20  -2  117.39   11.50
  -5 -20   2   49.30    7.50
  -5 -20   2   33.40    5.80
   5 -20  -2   34.00    5.60
   5 -20  -2   38.90    6.10
  -5  20   2   34.40    6.90
   5  20  -2   37.90    6.60
   5  20  -2   46.70    8.30
   4 -20  -2  110.79   10.00
   4 -20  -2  109.19   11.90
  -4 -20   2  116.89   13.80
  -4 -20   2  117.49    9.10
  -4 -20   2  118.59    8.20
  -4  20   2   96.79   11.30
   4  20  -2  116.39   14.40
   4  20  -2  103.99   10.80
  -3 -20   2  281.37   14.00
   3 -20  -2  267.27   15.40
  -3 -20   2  266.87   14.10
  -3 -20   2  301.17   17.00
   3 -20  -2  255.57   15.30
   3  20  -2  276.17   16.90
   3  20  -2  278.27   17.80
   2 -20  -2   20.70    5.90
   2 -20  -2   11.40    4.90
  -2 -20   2   17.30    5.10
  -2 -20   2   10.90    6.50
   2 -20  -2   14.60    4.30
   2  20  -2    9.70    6.50
   2  20  -2   12.80    6.80
  -2  20   2   24.10    5.40
  -1 -20   2  150.08   13.20
  -1 -20   2  136.89   24.30
   1 -20  -2  143.49    8.90
   1 -20  -2  155.48   11.30
   1 -20  -2  167.98    9.10
   1 -20  -2  151.58   13.60
   1  20  -2  121.39   14.30
   1  20  -2  153.48   13.40
   0 -20  -2   46.10    9.60
   0 -20   2   46.00    8.50
   0 -20  -2   51.99    6.00
   0 -20  -2   44.30    6.20
   0 -20   2   55.89   11.00
   0 -20  -2   51.79    8.70
   0  20  -2   45.50    9.30
   0  20   2   41.70    6.30
   0  20   2   51.89   10.50
   0  20  -2   54.09   10.00
   1 -20   2  730.93   31.70
  -1 -20  -2  692.73   28.90
   1 -20   2  704.33   31.50
  -1 -20  -2  716.33   30.50
  -1 -20  -2  782.72   31.50
  -1  20  -2  725.33   33.50
   1  20   2  703.93   31.30
   1  20   2  728.63   32.40
  -1  20  -2  733.93   31.20
  -2 -20  -2  101.89   11.00
  -2 -20  -2  103.99    8.00
  -2 -20  -2   95.79    7.10
   2 -20   2   90.99   11.50
   2 -20   2  103.19   11.20
   2  20   2  102.99   14.00
   2  20   2   94.49   10.00
   2  20   2  109.09   10.20
  -2  20  -2   89.39    7.30
   3 -20   2  137.69   11.40
  -3 -20  -2  148.89    8.90
  -3 -20  -2  136.59   16.90
   3 -20   2  148.59   18.10
  -3 -20  -2  139.39    8.50
   3  20   2  137.29   10.80
  -3  20  -2  127.59    7.80
   3  20   2  111.39   11.60
   3  20   2  146.79   10.80
   4 -20   2   99.89   10.40
  -4 -20  -2   87.89    7.00
   4 -20   2   84.89    9.30
  -4 -20  -2   94.69    7.30
  -4  20  -2   87.09    6.20
   4  20   2   88.89    9.80
   4  20   2   91.79    8.80
   4  20   2   99.39    8.60
   4  20   2   93.49   14.10
   5 -20   2    8.50    4.90
  -5 -20  -2    6.10    3.20
  -5 -20  -2    6.00    3.30
   5 -20   2   13.50    4.20
   5 -20   2    7.10    4.20
   5  20   2    7.40    3.50
  -5  20  -2   11.30    3.80
   5  20   2   12.40    6.40
  -6 -20  -2   67.09    6.20
  -6 -20  -2   69.29    5.40
   6 -20   2   85.79    8.40
   6 -20   2   69.29    6.10
   6  20   2   67.79   10.60
   6  20   2   78.89    6.50
  -7 -21   2   63.19    5.60
   7 -21  -2   77.39    9.90
   7 -21  -2   82.59    6.80
   7  21  -2   83.59    9.20
   7  21  -2   92.49    9.90
   6 -21  -2   90.29    7.90
   6 -21  -2   93.79    7.90
   6 -21  -2   68.89    9.40
  -6 -21   2   90.09    9.30
  -6 -21   2   83.59    5.80
   6  21  -2   80.69    7.30
   6  21  -2   92.59   10.90
   6  21  -2   79.59   10.70
  -5 -21   2   35.40    5.30
  -5 -21   2   37.50    6.70
   5 -21  -2   38.50    6.20
   5 -21  -2   36.10    7.00
  -5  21   2   41.20    7.20
   5  21  -2   36.80    5.80
   5  21  -2   32.60    6.80
  -4 -21   2   78.19    9.20
  -4 -21   2   72.89    9.40
   4 -21  -2   71.89   12.10
   4 -21  -2   82.29   11.80
  -4 -21   2   92.79    9.40
  -4  21   2   77.49   10.20
   4  21  -2   95.19   15.10
  -3 -21   2  134.89   13.30
  -3 -21   2  126.89    8.50
   3 -21  -2  142.69   11.20
   3 -21  -2  134.59   10.80
   3  21  -2  131.49   12.10
  -3  21   2  137.39   11.10
   3  21  -2  136.59   12.90
  -2 -21   2  122.09    8.70
   2 -21  -2  113.19    8.20
   2 -21  -2   91.89   11.20
  -2 -21   2  138.39   11.80
   2 -21  -2  102.39   10.40
  -2  21   2  128.49   10.40
   2  21  -2  109.39   12.50
   2  21  -2  109.69   11.80
   1 -21  -2   57.89    9.10
  -1 -21   2   49.20   10.90
  -1 -21   2   56.79   10.70
   1 -21  -2   55.69    7.70
   1 -21  -2   66.69    6.30
   1  21  -2   40.80    7.70
   1  21  -2   56.09   11.10
  -1  21   2   47.80    8.80
   0 -21   2   59.99   10.10
   0 -21  -2   43.60    6.00
   0 -21  -2   52.99    8.90
   0 -21   2   67.19   12.40
   0  21  -2   41.60    8.90
   0  21   2   40.70    7.20
   0  21   2   51.19    8.80
   0  21  -2   46.50   10.20
   1 -21   2  228.98   14.70
   1 -21   2  218.78   14.40
  -1 -21  -2  217.38   11.00
  -1 -21  -2  220.68   13.30
   1  21   2  212.78   12.90
  -1  21  -2  185.58   12.10
  -1  21  -2  225.98   14.00
  -1  21  -2  199.08   18.10
   1  21   2  203.58   13.80
  -2 -21  -2   31.50    5.60
   2 -21   2   34.00    6.50
  -2 -21  -2   42.20    6.50
   2 -21   2   26.00    6.30
   2  21   2   26.70    5.60
  -2  21  -2   40.10    6.30
   2  21   2   26.20    5.70
  -3 -21  -2   85.99    6.80
   3 -21   2   90.09   13.50
   3 -21   2   76.39   12.20
  -3 -21  -2   94.19   11.10
  -3 -21  -2   93.09    7.40
   3 -21   2   91.79   12.00
   3  21   2   93.39    9.20
  -3  21  -2   88.79    6.80
   3  21   2   73.19    9.60
   3  21   2   94.19   13.30
  -4 -21  -2   32.20    5.50
   4 -21   2   48.60    7.40
  -4 -21  -2   43.10    5.70
   4 -21   2   56.29    9.70
  -4  21  -2   45.70    5.40
   4  21   2   36.20    7.00
   4  21   2   34.30    7.60
  -5 -21  -2   31.20    5.30
   5 -21   2   18.20    4.20
  -5 -21  -2   18.60    3.30
   5 -21   2   25.90    5.30
   5 -21   2   39.40    7.20
   5  21   2   23.60    6.40
  -5  21  -2   24.80    3.60
   5  21   2   28.30    5.40
  -6 -21  -2  238.78   10.20
   6 -21   2  239.68   12.40
  -6  21  -2  237.68   11.00
   6  21   2  235.38   12.60
  -6 -22   2   86.69    5.60
   6 -22  -2   76.99    8.10
   6 -22  -2   97.89    8.00
   6  22  -2   96.99   10.30
   6  22  -2   89.09    9.00
   6  22  -2   75.69   11.20
  -5 -22   2  176.38    8.90
   5 -22  -2  183.98   10.50
   5 -22  -2  171.08   11.50
   5  22  -2  174.08   12.50
   5  22  -2  163.78   13.10
  -5  22   2  176.98   13.30
   5  22  -2  194.88   10.80
  -4 -22   2   63.59    8.70
   4 -22  -2   99.89    8.60
   4 -22  -2   93.09   10.70
  -4 -22   2   82.19    6.60
   4 -22  -2   93.59   12.00
   4  22  -2   83.89    9.10
  -4  22   2   83.69   10.20
   4  22  -2   84.79   11.90
  -3 -22   2   75.19    7.20
   3 -22  -2   80.39    9.60
  -3 -22   2   84.69   11.40
   3 -22  -2   66.19   10.30
   3  22  -2   79.49   14.90
  -3  22   2   81.09    9.40
   2 -22  -2   83.19    9.80
  -2 -22   2   77.29   11.10
   2 -22  -2   99.29   10.60
  -2  22   2   85.39    9.50
   2  22  -2   94.09   11.20
   2  22  -2  103.39   11.90
   1 -22  -2   13.90    3.80
   1 -22  -2   24.80    7.10
   1 -22  -2   14.40    5.30
  -1 -22   2    2.80    5.50
  -1  22   2   13.00    4.90
   1  22  -2   30.50    6.70
   1  22  -2   16.10    6.40
   0 -22   2   43.40    6.80
   0 -22  -2   58.09    9.00
   0 -22   2   45.50    7.90
   0 -22  -2   56.09    5.90
   0 -22  -2   55.89    7.30
   0  22  -2   49.20    9.70
   0  22   2   55.49    8.30
   0  22  -2   42.90    8.10
  -1 -22  -2   99.79    7.30
  -1 -22  -2  115.39   10.50
  -1 -22  -2   98.19    7.60
   1 -22   2   97.39   11.30
   1 -22   2  100.29   10.60
  -1  22  -2  105.99   15.60
   1  22   2   99.29    9.40
  -1  22  -2  105.89   10.50
   2 -22   2  204.88   13.60
  -2 -22  -2  190.28   12.50
   2 -22   2  174.28   13.30
  -2 -22  -2  188.98   13.00
  -2 -22  -2  184.68    9.90
  -2  22  -2  182.48   12.20
   2  22   2  191.38   14.00
   2  22   2  185.68   15.50
  -3 -22  -2   26.60    4.10
   3 -22   2   19.20    4.90
  -3 -22  -2   23.80    6.50
   3 -22   2   19.10    6.80
  -3 -22  -2   23.90    3.90
   3  22   2   26.60    6.30
   3  22   2   16.40    6.60
   3  22   2   33.00    5.20
  -3  22  -2   28.60    5.00
  -3  22  -2   25.20    6.80
   4 -22   2   33.30    8.00
  -4 -22  -2   45.00    5.00
   4 -22   2   35.30    6.70
  -4  22  -2   31.60    4.50
   5 -22   2   27.80    5.20
   5 -22   2   23.90    5.60
   5 -22   2   38.10    7.40
  -5 -22  -2   35.20    5.30
  -5 -22  -2   30.40    5.40
   5  22   2   42.80    8.90
  -5  22  -2   33.50    5.10
   5  22   2   30.90    4.20
   6 -23  -2   77.79    7.00
   6  23  -2   65.89    9.00
   5 -23  -2   54.39   10.80
   5 -23  -2   58.39    6.70
  -5 -23   2   41.70    6.40
   5  23  -2   47.40    6.50
  -5  23   2   40.50    7.40
   5  23  -2   37.00    9.10
   5  23  -2   63.29    9.60
  -4 -23   2   23.30    7.10
  -4 -23   2   16.00    3.80
   4 -23  -2   14.70    4.30
   4 -23  -2   16.70    6.20
   4  23  -2   19.60    4.80
   4  23  -2   19.20    6.20
  -4  23   2   21.60    5.70
   3 -23  -2   30.10    5.30
  -3 -23   2   21.20    6.10
   3 -23  -2   49.60    9.10
   3  23  -2   29.30    6.40
  -3  23   2   27.70    5.40
   3  23  -2   21.50    5.50
   2 -23  -2    7.50    4.70
   2 -23  -2   11.20    5.50
  -2 -23   2    3.90    5.40
   2  23  -2    9.30    6.00
   2  23  -2    4.80    5.20
  -2  23   2    8.70    4.60
   1 -23  -2   27.10    7.50
   1 -23  -2   26.60    7.10
  -1 -23   2   26.60    9.20
   1  23  -2   26.90    6.50
   1  23  -2   31.10    7.00
   0 -23  -2   49.99    5.70
   0 -23   2   55.99    8.10
   0 -23   2   67.99   10.40
   0 -23  -2   38.60    5.50
   0  23  -2   48.80   10.30
   0  23  -2   47.70    7.70
  -1 -23  -2   58.89    7.20
  -1 -23  -2   81.09    6.40
  -1 -23  -2   72.09    8.60
   1 -23   2   93.69   10.50
   1 -23   2   74.89    9.50
  -1  23  -2   73.29   13.90
  -1  23  -2   76.99    9.40
   1  23   2   86.69    8.20
   2 -23   2   23.10    5.80
   2 -23   2   20.70    5.30
  -2 -23  -2   18.40    3.80
  -2 -23  -2   29.50    5.00
  -2 -23  -2   15.40    5.20
  -2  23  -2   25.60    5.20
   2  23   2   25.20    4.80
   3 -23   2  120.99    9.30
  -3 -23  -2  100.19   11.60
  -3 -23  -2  122.09    7.30
   3 -23   2  131.39   11.60
  -3 -23  -2  138.59   10.90
   3  23   2  121.59    8.90
  -3  23  -2  126.69    9.10
   3  23   2  129.19   12.60
   4 -23   2   75.99    7.00
   4 -23   2   74.49    7.10
  -4 -23  -2   76.89    6.70
  -4 -23  -2   69.09    5.30
  -4  23  -2   75.69    6.90
   4  23   2   60.79    9.40
   4  23   2   64.49    8.60
   5 -23   2   86.49    7.10
  -5 -23  -2   69.89    4.90
   5  23   2   76.09    9.00
  -5  23  -2   80.79    7.10
   5  24  -2   18.60    3.80
   5  24  -2    9.90    6.00
   5  24  -2   15.50    5.70
  -4 -24   2  100.99   12.40
   4 -24  -2   94.99    7.90
  -4  24   2   89.69    9.80
   4  24  -2   86.99    7.70
   4  24  -2   75.19   10.50
   3 -24  -2   47.70    8.10
   3 -24  -2   61.09    7.80
  -3 -24   2   44.70    8.80
   3  24  -2   39.50    6.60
  -3  24   2   41.60    7.60
   3  24  -2   43.10    7.20
  -2 -24   2    4.00    4.90
   2 -24  -2    2.40    5.10
   2 -24  -2    6.40    5.30
  -2  24   2   -0.30    4.10
   2  24  -2   -2.10    5.40
   2  24  -2    5.90    5.00
  -1 -24   2    6.60    4.80
   1 -24  -2    7.80    4.40
   1 -24  -2    6.70    7.80
   1  24  -2   17.60    5.70
   1  24  -2   17.20    5.70
  -1  24   2    9.50    4.50
   0 -24   2  364.76   17.60
   0 -24   2  308.67   18.40
   0 -24  -2  355.46   16.80
   0 -24  -2  352.96   14.90
   0  24  -2  351.76   17.80
   0  24   2  370.26   16.90
   0  24  -2  370.36   18.80
  -1 -24  -2    8.20    4.50
  -1 -24  -2   12.40    3.30
   1 -24   2    8.10    5.40
  -1 -24  -2   12.80    5.30
  -1  24  -2   10.90    7.40
  -1  24  -2    6.10    4.90
   1  24   2    1.00    3.80
  -2 -24  -2   39.50    4.80
  -2 -24  -2   34.90    5.60
   2 -24   2   35.90    5.90
  -2 -24  -2   39.00    6.90
   2 -24   2   37.10    5.50
   2  24   2   43.90    6.40
  -2  24  -2   33.70    5.10
  -3 -24  -2   19.90    3.10
  -3 -24  -2   31.50    7.70
   3 -24   2   23.10    4.40
  -3 -24  -2   18.40    4.80
   3  24   2   17.20    6.40
  -3  24  -2   26.60    4.60
   3  24   2   15.00    5.50
   4 -24   2   75.39    7.10
   4 -24   2   70.29    6.80
  -4 -24  -2   69.79    4.90
  -4  24  -2   74.09    7.60
   4  24   2   62.59    9.20
   5 -25  -2   36.20    6.30
   5  25  -2   35.00    6.10
   4 -25  -2    6.30    5.00
   4  25  -2    5.40    7.40
   4  25  -2    8.70    4.50
  -4  25   2   -1.40    4.90
  -3 -25   2    7.30    5.10
   3 -25  -2   15.80    5.30
   3  25  -2   18.30    5.60
  -3  25   2   10.30    4.20
   3  25  -2    6.10    4.10
  -2 -25   2   72.39    8.10
   2 -25  -2   64.69    9.80
   2 -25  -2   60.19    7.60
  -2  25   2   54.79    6.90
   2  25  -2   63.69   10.10
   2  25  -2   69.99    7.80
  -1 -25   2   35.20    5.40
   1 -25  -2   38.80    6.80
   1  25  -2   22.50    5.50
  -1  25   2   20.20    4.30
   1  25  -2   24.30    5.80
   0 -25   2   45.00    7.50
   0 -25  -2   55.39    7.20
   0  25   2   56.89    6.50
   0  25  -2   41.70    6.90
  -1 -25  -2   31.80    4.90
   1 -25   2   50.69    7.50
  -1 -25  -2   36.40    7.00
   1 -25   2   43.70    6.60
  -1  25  -2   23.60   13.20
  -1  25  -2   37.80    7.90
   1  25   2   47.40    6.30
  -2 -25  -2   73.19    6.20
  -2 -25  -2   61.09    9.20
   2 -25   2   76.99    8.50
   2 -25   2   70.19   11.80
   2  25   2   71.99   10.50
  -2  25  -2   82.49    8.80
   2  25   2   75.19    6.60
   3 -25   2  105.39    8.90
   3 -25   2   88.19    7.80
  -3 -25  -2   91.99    5.70
  -3  25  -2  102.59    7.80
   3  25   2   93.49   10.70
   4 -25   2   98.49    8.00
   4 -26  -2   45.10    7.10
   4  26  -2   32.00    5.60
   4  26  -2   26.70    5.80
   3 -26  -2   12.90    5.20
  -3 -26   2    1.90    5.50
   3 -26  -2    5.00    4.70
   3  26  -2    5.30    5.80
  -3  26   2   10.70    4.20
   3  26  -2    7.80    4.70
   2 -26  -2   18.30    6.80
   2 -26  -2    9.10    4.00
  -2 -26   2   11.50    4.60
   2  26  -2   -2.70    5.60
   2  26  -2    3.90    4.10
  -2  26   2    5.70    3.80
  -1 -26   2   20.90    4.40
   1 -26  -2   27.20    4.40
   1  26  -2   15.80    7.60
  -1  26   2   31.40    5.70
   1  26  -2   23.20    5.30
   0 -26   2   35.10    6.50
   0 -26  -2   37.00    5.90
   0  26  -2   38.50    6.80
   0  26  -2   42.30    8.10
   0  26   2   26.80    4.20
  -1 -26  -2  103.79    8.10
   1 -26   2  111.59    8.40
   1  26   2  107.89    7.40
  -1  26  -2  113.09   10.40
   1  26   2   88.09   11.40
  -1  26  -2  133.79   13.60
   2 -26   2   13.10    3.60
   2 -26   2   15.10    4.70
  -2 -26  -2   16.80    5.30
   2 -26   2   22.40    5.70
   2  26   2   15.50    7.20
  -2  26  -2   15.40    5.40
   3 -26   2   92.79    6.40
   3  27  -2   68.99    6.70
   3  27  -2   83.59    7.80
   2 -27  -2   24.60    4.70
   2  27  -2   33.80    6.20
  -2  27   2   20.50    3.90
   1 -27  -2   86.09    6.80
  -1 -27   2   70.39    7.00
   1  27  -2   95.29    8.30
  -1  27   2   80.49    6.50
   0 -27   2   56.39    6.50
   0 -27  -2   64.89    6.10
   0  27   2   55.99    6.00
   0  27  -2   40.60    6.20
   1 -27   2    9.90    4.90
   1 -27   2   11.00    4.60
  -1 -27  -2    6.40    3.40
   1  27   2    0.70    3.40
 -11   0   3   18.00    2.60
  10   0  -3    7.70    4.80
  10   0  -3   -0.20    3.90
 -10   0   3    3.30    2.40
 -10   0   3    4.70    2.30
   9   0  -3  204.98   10.80
   9   0  -3  181.48   14.30
  -9   0   3  192.58   10.10
   9   0  -3  202.48   12.80
  -9   0   3  200.08   10.30
   8   0  -3  545.95   37.20
   8   0  -3  476.25   25.60
   8   0  -3  520.35   25.60
   8   0  -3  564.24   26.20
  -8   0   3  547.25   22.80
   8   0  -3  556.44   25.20
  -8   0   3  555.14   22.50
   8   0  -3  536.35   23.50
   7   0  -3  940.51   37.50
   7   0  -3  853.71   39.00
  -7   0   3  919.31   36.70
   7   0  -3  941.21   38.30
   7   0  -3  894.51   39.60
   7   0  -3  955.70   38.30
  -7   0   3  974.80   36.30
   6   0  -3  452.35   22.40
  -6   0   3  459.35   20.60
  -6   0   3  549.74   48.60
   6   0  -3  421.66   24.00
   6   0  -3  453.55   21.40
  -6   0   3  452.15   18.90
   6   0  -3  457.55   22.30
  -5   0   3   26.40    4.80
  -5   0   3   26.90   15.80
  -5   0   3   42.40   15.90
  -4   0   3  112.29   17.80
   4   0  -3  139.09   16.50
  -3   0   3 1164.38   50.69
  -3   0   3 1231.08   48.60
   3   0  -3 1164.18   51.49
   3   0  -3 1181.68   51.49
   3   0  -3 1184.18   54.79
   2   0  -3  434.46   24.90
  -2   0   3  510.05   20.80
   2   0  -3  452.25   25.70
  -2   0   3  452.15   23.00
   2   0  -3  462.45   22.10
   1   0  -3 1662.03   72.89
   1   0  -3 1741.53   69.39
  -1   0   3 1966.50   66.09
  -1   0   3 1820.52   68.89
   1   0  -3 1772.02   67.29
   0   0  -3  404.36   18.70
   0   0  -3  462.25   16.80
   0   0  -3  373.66   23.70
  -1   0  -3  216.08   18.90
  -1   0  -3  272.97   15.40
  -2   0  -3   34.60    9.80
  -2   0  -3   60.49   11.40
  -2   0  -3   50.09   11.30
  -3   0  -3 1285.07   63.59
  -3   0  -3 1283.27   65.09
  -3   0  -3 1305.97   57.59
  -4   0  -3   12.30   30.60
  -4   0  -3    5.40   25.50
   4   0   3   27.60    6.90
   4   0   3   15.10    7.60
   5   0   3  440.46   22.60
   5   0   3  439.56   21.90
   5   0   3  450.15   21.60
   5   0   3  397.46   23.20
   6   0   3  478.75   22.50
   6   0   3  447.36   23.70
   6   0   3  462.35   22.40
   7   0   3   10.10    5.50
   7   0   3   11.20    5.20
   8   0   3   28.60    6.60
   8   0   3   39.00    6.30
   9   0   3   90.89    6.40
   9   0   3   83.79    6.30
 -11  -1   3   18.00    2.60
 -11   1   3   18.00    2.60
 -10  -1   3   83.29    5.80
  10  -1  -3   92.09    8.60
 -10  -1   3   89.59    5.60
  10  -1  -3   92.29    7.80
  10   1  -3  102.69    9.30
  10   1  -3   87.49    7.90
 -10   1   3   92.19    5.80
 -10   1   3   94.09    5.60
  -9  -1   3  122.19    7.90
   9  -1  -3  140.79   10.50
   9  -1  -3  112.99    8.30
   9  -1  -3  125.49   16.90
   9  -1  -3  125.09   12.10
  -9  -1   3  115.09    7.60
  -9   1   3  121.49    7.50
  -9   1   3  124.79    7.90
   9   1  -3  123.09   13.50
   9   1  -3  115.59    8.60
   9   1  -3  130.59   10.50
  -8  -1   3   65.69    7.60
  -8  -1   3   74.69    6.70
   8  -1  -3   72.59    9.10
   8  -1  -3   76.99   10.30
   8  -1  -3   65.39    8.20
   8  -1  -3   77.19   11.40
   8  -1  -3   80.39   12.50
  -8   1   3   70.09    6.50
  -8   1   3   76.99    7.50
   8   1  -3   64.19    8.50
   8   1  -3   73.69   11.00
   8   1  -3   85.99   11.80
   8   1  -3   67.29   12.60
   8   1  -3   72.29   16.80
   7  -1  -3   25.80    6.70
   7  -1  -3   26.10    6.30
   7  -1  -3   17.60    5.30
  -7  -1   3   33.20    5.60
   7  -1  -3   28.70    6.60
  -7  -1   3   25.90    5.00
  -7   1   3   21.30    4.70
   7   1  -3   34.80    8.30
   7   1  -3   31.30    6.90
   7   1  -3   33.50    7.90
   7   1  -3   27.90    5.60
  -7   1   3   39.10    5.50
   6  -1  -3  136.99   11.60
   6  -1  -3  156.58   13.00
   6  -1  -3  139.19   12.90
  -6  -1   3  145.79   11.10
   6  -1  -3  119.09   15.10
   6   1  -3  150.88   12.90
  -6   1   3   97.09   31.00
   6   1  -3  135.49   12.10
  -6   1   3  151.38    8.30
  -6   1   3  139.29   10.90
   6   1  -3  146.59   15.80
  -5  -1   3   89.29   18.30
  -5  -1   3   99.99    6.80
  -5  -1   3   80.19   15.70
  -5   1   3   91.29   17.30
  -5   1   3   79.59   18.10
  -5   1   3   94.39    6.40
   4  -1  -3  202.18   18.90
  -4  -1   3  205.68   17.50
  -4  -1   3  205.28   19.90
  -4   1   3  236.18   21.70
  -4   1   3  221.18   18.20
   4   1  -3  216.78   18.60
  -3  -1   3  523.05   27.20
   3  -1  -3  541.45   29.00
   3  -1  -3  526.45   32.90
  -3  -1   3  533.35   25.30
   3  -1  -3  533.35   29.30
  -3   1   3  571.54   25.70
   3   1  -3  522.95   34.40
   3   1  -3  512.25   28.10
   3   1  -3  496.45   29.40
  -3   1   3  537.95   27.90
   2  -1  -3 3638.14  144.59
  -2  -1   3 4183.58  142.29
  -2  -1   3 3860.51  144.09
   2  -1  -3 3663.13  147.09
   2   1  -3 3700.63  146.69
  -2   1   3 3960.20  144.59
  -2   1   3 4172.68  141.79
   2   1  -3 3780.52  143.19
  -2   1   3 3621.94  143.29
   2   1  -3 3876.21  145.49
   1  -1  -3  407.06   17.50
   1  -1  -3  399.26   20.30
   1  -1  -3  397.46   24.10
  -1  -1   3  422.96   19.50
   1   1  -3  379.16   26.80
  -1   1   3  441.66   19.90
  -1   1   3  442.76   18.10
   1   1  -3  382.06   23.30
   1   1  -3  414.06   18.60
   0  -1  -3 2384.26   82.59
   0  -1  -3 2038.50   88.69
   0  -1  -3 2190.28   82.29
   0  -1   3 2302.77   81.99
   0  -1  -3 2277.87   81.49
   0   1  -3 2006.10   87.89
   0   1  -3 2285.47   83.19
  -1  -1  -3  844.02   32.20
  -1  -1  -3  680.73   36.70
  -1  -1  -3  754.22   32.80
  -1   1  -3  728.63   36.50
  -1   1  -3  713.73   32.20
  -2  -1  -3   63.59   12.50
  -2  -1  -3   88.69   13.60
  -2  -1  -3   63.19   15.60
  -2   1  -3   67.99   11.20
  -2   1  -3   38.70   10.80
  -2   1  -3   57.79   11.40
  -3  -1  -3  271.07   26.50
  -3  -1  -3  219.78   24.90
  -3  -1  -3  289.87   34.00
  -3   1  -3  231.58   31.90
  -3   1  -3  258.87   23.30
  -3   1  -3  244.78   26.90
   4  -1   3  454.15   21.90
  -4  -1  -3  431.06   59.79
   4  -1   3  424.76   22.90
  -4  -1  -3  415.56   47.60
   4   1   3  406.26   24.00
  -4   1  -3  462.35   62.19
  -4   1  -3  468.05   49.80
   4   1   3  506.05   27.20
   5  -1   3  482.15   23.00
   5  -1   3  488.75   22.90
   5  -1   3  464.45   24.00
   5  -1   3  489.35   24.60
   5   1   3  458.85   24.80
   5   1   3  529.15   23.70
   6  -1   3  134.29   14.00
   6  -1   3  122.09   11.40
   6  -1   3  131.39   11.10
   6  -1   3  128.19   12.40
   6   1   3  140.89   11.90
   6   1   3  107.69   13.70
   6   1   3  117.29   12.90
   7  -1   3  147.29   11.00
   7  -1   3  140.49   11.80
   7   1   3  151.38   11.70
   7   1   3  129.39   11.90
   8  -1   3   25.60    4.40
   8  -1   3   29.10    6.70
   8   1   3   17.40    4.60
   8   1   3   19.90    4.30
   9  -1   3    4.10    2.80
   9  -1   3    6.40    2.80
   9   1   3    7.50    3.20
   9   1   3    5.60    2.90
 -11  -2   3   32.20    2.90
 -10  -2   3    9.80    2.60
  10  -2  -3    8.60    4.80
 -10  -2   3    6.90    2.80
  10  -2  -3    7.50    3.70
  10   2  -3    5.50    4.40
  10   2  -3    4.40    4.70
 -10   2   3    7.40    2.20
 -10   2   3   10.00    3.40
   9  -2  -3   80.89   12.00
   9  -2  -3   64.89    8.90
   9  -2  -3   73.09   12.00
   9  -2  -3   73.09    6.80
  -9  -2   3   80.19    6.50
  -9  -2   3   59.99    6.40
  -9   2   3   59.69    6.00
   9   2  -3   85.39    7.80
   9   2  -3   79.59   11.60
   9   2  -3   79.19   10.80
  -9   2   3   73.99    6.00
   9   2  -3   79.89    9.70
   8  -2  -3   87.39   11.90
  -8  -2   3   93.89    8.30
   8  -2  -3   98.99   10.40
  -8  -2   3   86.49    7.50
   8  -2  -3   85.89   13.60
   8  -2  -3  101.59    8.50
   8   2  -3   83.69   12.50
   8   2  -3   82.59   18.60
   8   2  -3   92.89   12.80
   8   2  -3   74.59    9.10
  -8   2   3   84.09    7.60
   8   2  -3   88.29   11.30
   7  -2  -3  311.87   18.50
   7  -2  -3  281.17   15.80
   7  -2  -3  262.37   18.90
   7  -2  -3  310.57   17.10
  -7  -2   3  318.87   15.50
   7  -2  -3  303.17   17.00
  -7  -2   3  323.37   14.40
  -7   2   3  307.97   14.90
   7   2  -3  320.27   17.00
   7   2  -3  297.47   19.50
   7   2  -3  303.77   25.30
   7   2  -3  299.57   18.50
  -7   2   3  319.47   14.10
   6  -2  -3  412.46   23.20
  -6  -2   3  483.95   67.99
   6  -2  -3  370.76   26.60
   6  -2  -3  405.46   21.10
  -6  -2   3  454.55   18.30
  -6  -2   3  417.86   19.90
   6  -2  -3  427.36   20.50
   6  -2  -3  432.46   20.40
   6   2  -3  436.06   21.10
  -6   2   3  425.16   19.20
   6   2  -3  438.36   20.80
  -6   2   3  437.26   18.00
   6   2  -3  429.86   24.00
  -6   2   3  531.65   77.09
   6   2  -3  426.26   21.60
  -5  -2   3  351.56   30.40
  -5  -2   3  348.17   30.00
  -5  -2   3  362.76   15.20
  -5   2   3  297.87   33.20
  -5   2   3  361.76   31.50
  -5   2   3  348.57   14.90
  -4  -2   3  337.67   24.40
   4  -2  -3  360.66   24.30
  -4  -2   3  315.27   31.50
   4   2  -3  381.56   23.20
  -4   2   3  349.67   26.50
  -4   2   3  391.76   23.80
   3  -2  -3  663.43   32.80
  -3  -2   3  613.94   30.80
   3  -2  -3  589.54   36.40
  -3  -2   3  633.14   29.20
   3  -2  -3  637.54   33.50
  -3   2   3  670.43   32.30
   3   2  -3  649.54   38.40
  -3   2   3  682.63   29.40
   3   2  -3  621.24   34.00
   3   2  -3  664.13   32.40
  -3   2   3  587.44   33.50
  -2  -2   3  869.41   36.20
   2  -2  -3  791.12   39.40
   2  -2  -3  813.12   37.60
  -2  -2   3  789.62   34.70
   2  -2  -3  813.72   34.50
  -2  -2   3  755.72   40.80
   2   2  -3  839.02   38.90
   2   2  -3  873.11   36.40
  -2   2   3  852.81   36.80
   2   2  -3  868.61   38.90
  -2   2   3  802.92   38.00
  -2   2   3  925.81   33.60
   1  -2  -3   64.99    9.60
  -1  -2   3   46.60   11.20
   1  -2  -3   56.19    5.30
   1   2  -3   45.50   10.80
   1   2  -3   43.30    7.80
  -1   2   3   50.99    8.30
   1   2  -3   63.49    8.00
  -1   2   3   63.69    7.50
   0  -2  -3  620.44   24.30
   0  -2  -3  571.34   23.10
   0  -2   3  598.74   23.00
   0  -2   3  496.75   30.80
   0  -2  -3  581.34   21.30
   0   2  -3  560.44   24.70
   0   2   3  480.15   24.80
   0   2  -3  510.15   28.60
  -1  -2  -3  304.07   16.10
  -1  -2  -3  301.57   22.70
  -1  -2  -3  326.37   18.60
  -1   2  -3  298.37   21.40
  -1   2  -3  329.27   15.40
  -1   2  -3  334.17   13.90
  -2  -2  -3  467.55   28.20
  -2  -2  -3  432.26   23.90
  -2  -2  -3  433.86   28.90
  -2   2  -3  436.36   26.90
  -3  -2  -3  983.20   51.29
  -3  -2  -3 1196.58   58.99
  -3  -2  -3  969.30   49.10
  -3   2  -3 1046.20   47.30
  -3   2  -3  981.40   52.69
   4  -2   3  350.26   17.90
   4  -2   3  314.07   19.10
  -4  -2  -3  341.87   45.50
  -4  -2  -3  363.96   58.89
   4   2   3  311.37   26.40
  -4   2  -3  356.96   60.09
  -4   2  -3  325.67   50.49
   4   2   3  301.17   20.40
   5  -2   3  260.17   15.40
   5  -2   3  288.57   16.60
   5  -2   3  263.37   15.30
   5  -2   3  242.98   16.20
   5   2   3  266.57   16.10
   5   2   3  234.78   17.40
   5   2   3  242.38   15.00
   6  -2   3  527.95   26.10
   6  -2   3  549.25   24.90
   6  -2   3  549.45   25.50
   6   2   3  564.04   25.70
   6   2   3  510.35   26.60
   7  -2   3   61.69    8.80
   7  -2   3   69.39    8.30
   7   2   3   51.79    9.90
   7   2   3   65.49    9.40
   8  -2   3   39.40    6.10
   8  -2   3   35.90    6.50
   8   2   3   37.30    7.60
   8   2   3   46.10    6.90
   9  -2   3   41.70    4.60
   9  -2   3   41.40    4.60
   9   2   3   41.90    5.10
   9   2   3   40.40    5.10
 -11  -3   3   31.30    2.90
  10  -3  -3   91.09    7.20
  10  -3  -3   80.79    8.80
 -10  -3   3   86.69    5.50
 -10  -3   3   77.59    7.50
 -10   3   3   88.19    5.20
  10   3  -3   81.69    8.40
  10   3  -3   90.99    8.80
 -10   3   3   66.39    7.40
  -9  -3   3   17.90    3.90
   9  -3  -3   19.80    6.80
  -9  -3   3   17.30    3.50
   9  -3  -3   24.50    5.60
   9  -3  -3   25.20    4.30
   9  -3  -3   23.00    7.80
  -9   3   3   24.30    4.40
   9   3  -3   23.30    6.10
   9   3  -3   21.60    5.40
   9   3  -3   21.90    6.70
  -9   3   3   18.30    3.50
   9   3  -3   27.30    9.20
   9   3  -3   34.00    6.40
  -8  -3   3   38.80    6.30
   8  -3  -3   53.39    9.30
   8  -3  -3   56.79    7.60
   8  -3  -3   42.20    8.60
  -8  -3   3   57.69    7.60
   8  -3  -3   51.29    7.50
   8   3  -3   45.90   11.20
  -8   3   3   53.79    6.40
   8   3  -3   32.80    7.00
  -8   3   3   40.50    5.40
   8   3  -3   69.79   12.00
   8   3  -3   47.60    8.50
   8   3  -3   43.80    8.20
  -7  -3   3  215.58   12.30
   7  -3  -3  230.18   14.20
  -7  -3   3  211.58   11.20
   7  -3  -3  192.58   17.20
   7  -3  -3  185.08   15.00
   7   3  -3  222.98   19.20
   7   3  -3  176.98   21.20
  -7   3   3  198.88   11.50
  -7   3   3  213.38   11.50
   6  -3  -3   38.70    7.20
   6  -3  -3   58.79    9.90
  -6  -3   3   33.70    5.60
   6  -3  -3   46.70    8.80
  -6  -3   3   30.70    6.50
   6  -3  -3   30.00    8.60
   6   3  -3   46.20    8.60
   6   3  -3   33.10    7.00
   6   3  -3   36.80    8.90
  -6   3   3   33.90    4.90
   6   3  -3   44.00    7.10
  -6   3   3   51.39    6.20
  -5  -3   3   41.50   16.10
  -5  -3   3   48.60   22.70
  -5  -3   3   63.49   16.40
  -5  -3   3   61.89    5.90
  -5   3   3   90.89   18.40
  -5   3   3   56.49    5.20
  -5   3   3   71.29   20.40
   4  -3  -3 1178.28   55.29
  -4  -3   3 1258.07   55.29
  -4  -3   3 1199.78   53.59
  -4  -3   3 1208.78   46.80
  -4  -3   3 1102.79   58.49
  -4   3   3 1263.77   46.70
   4   3  -3 1413.06   54.69
  -4   3   3 1302.27   57.89
  -4   3   3 1289.97   54.89
   3  -3  -3   24.40   10.70
   3  -3  -3   16.60    9.00
  -3  -3   3   15.30    8.00
  -3  -3   3   23.40    7.30
  -3  -3   3   20.70    6.90
   3  -3  -3   24.00   16.20
  -3  -3   3   36.40   14.00
  -3   3   3    4.90    9.90
   3   3  -3   17.90    8.20
   3   3  -3   14.60   11.00
  -3   3   3   24.60    6.80
  -3   3   3   14.40    8.10
   2  -3  -3 1119.79   46.20
  -2  -3   3 1220.98   48.40
  -2  -3   3 1164.78   47.10
   2  -3  -3 1152.98   49.90
  -2  -3   3 1075.19   53.69
  -2  -3   3 1215.88   46.80
  -2   3   3 1147.09   49.00
   2   3  -3 1170.98   51.29
   2   3  -3 1139.89   52.59
   2   3  -3 1199.78   49.10
  -2   3   3 1272.77   49.60
  -1  -3   3 1199.28   58.09
   1  -3  -3 1312.47   52.09
  -1  -3   3 1380.36   51.59
   1  -3  -3 1310.37   52.39
   1   3  -3 1294.27   55.99
   1   3  -3 1331.87   51.99
   1   3  -3 1260.07   53.29
  -1   3   3 1355.66   52.69
  -1   3   3 1305.57   52.39
   0  -3  -3 1976.00   69.89
   0  -3   3 1908.31   67.79
   0  -3   3 1611.94   75.69
   0  -3  -3 1844.82   67.59
   0   3   3 1624.94   70.49
   0   3  -3 1715.33   69.09
   0   3   3 1781.92   67.99
   0   3  -3 1877.21   67.79
   0   3   3 1886.01   67.19
   0   3  -3 1707.13   73.29
   1  -3   3 3569.34  129.29
  -1  -3  -3 3784.72  133.99
   1  -3   3 3041.60  137.89
  -1  -3  -3 3659.63  129.59
  -1   3  -3 3525.55  136.09
  -1   3  -3 3617.04  130.19
  -1   3  -3 3208.28  130.99
  -1   3  -3 3761.12  129.39
  -2  -3  -3  341.87   24.60
  -2  -3  -3  310.17   19.30
  -2  -3  -3  302.17   26.10
  -2   3  -3  337.57   23.10
  -3  -3  -3  510.05   37.60
  -3  -3  -3  508.65   33.10
  -3  -3  -3  552.74   41.30
  -3   3  -3  594.14   36.60
  -3   3  -3  590.74   39.90
   4  -3   3  228.08   15.40
  -4  -3  -3  221.78   40.50
   4  -3   3  236.08   14.10
  -4  -3  -3  227.78   31.70
   4  -3   3  211.68   15.70
   4   3   3  211.98   17.60
   4   3   3  227.58   17.70
  -4   3  -3  199.38   34.70
   5  -3   3  355.66   20.70
   5  -3   3  390.86   20.70
   5  -3   3  396.46   20.10
   5  -3   3  383.86   19.10
   5  -3   3  393.36   18.90
   5   3   3  365.16   21.70
   5   3   3  384.06   18.60
   5   3   3  377.16   20.50
   5   3   3  371.16   22.70
   6  -3   3  225.08   14.90
   6  -3   3  220.58   13.70
   6  -3   3  224.18   15.10
   6   3   3  214.28   15.50
   6   3   3  237.68   15.10
   6   3   3  196.68   14.60
   7  -3   3   13.40    4.70
   7  -3   3   13.50    8.10
   7   3   3   12.90    5.80
   7   3   3   24.30    6.20
   8  -3   3   94.39    8.00
   8  -3   3   91.99    7.40
   8   3   3   89.09    8.40
   8   3   3   73.59    8.50
  -8   3  -3   89.29    8.30
   9  -3   3   30.60    4.40
   9  -3   3   33.40    4.40
   9   3   3   38.80    5.50
   9   3   3   35.60    4.70
  10  -4  -3   64.59    6.30
 -10  -4   3   68.89    6.00
 -10  -4   3   73.69    5.20
  10  -4  -3   56.69    9.60
 -10   4   3   82.29    4.70
  10   4  -3   74.19    8.70
 -10   4   3   72.49    5.00
  10   4  -3   65.29    8.30
   9  -4  -3   19.70    6.20
  -9  -4   3   22.20    4.00
  -9  -4   3   34.00    5.40
   9  -4  -3   31.60    5.30
   9  -4  -3   36.60    7.00
   9   4  -3   21.90    9.20
   9   4  -3   25.70    6.40
  -9   4   3   32.40    4.50
  -9   4   3   25.50    4.70
  -8  -4   3  117.69    9.10
   8  -4  -3   92.49   14.60
   8  -4  -3  121.59   10.60
   8  -4  -3  126.89   12.20
  -8  -4   3  123.39    8.40
   8  -4  -3  117.49    9.20
  -8   4   3  117.39    7.50
   8   4  -3  106.99   12.90
  -8   4   3  124.19    8.20
   8   4  -3  132.99   10.30
   8   4  -3  114.49   21.50
   8   4  -3  105.29   13.10
   8   4  -3  122.59   12.80
   7  -4  -3  205.38   20.40
   7  -4  -3  167.58   16.70
  -7  -4   3  197.48   10.90
  -7   4   3  204.58   10.10
   7   4  -3  185.58   21.70
   6  -4  -3  219.88   14.70
   6  -4  -3  220.88   17.10
  -6  -4   3  232.18   14.10
   6  -4  -3  220.98   13.60
   6  -4  -3  234.58   14.20
  -6  -4   3  229.48   11.40
   6   4  -3  221.08   18.00
   6   4  -3  210.58   14.40
  -6   4   3  222.68   12.10
   6   4  -3  249.68   16.60
   6   4  -3  208.88   14.40
  -5  -4   3   68.89   22.60
  -5  -4   3   76.19   17.20
  -5  -4   3   48.50   18.80
  -5  -4   3   63.29    6.00
  -5   4   3   55.19   20.10
  -5   4   3   60.59    5.10
  -5   4   3   75.39   18.80
  -4  -4   3  222.78   21.30
  -4  -4   3  215.18   10.50
   4  -4  -3  185.48   23.50
  -4  -4   3  201.38   25.60
  -4  -4   3  210.78   19.20
  -4   4   3  207.18   24.00
  -4   4   3  202.88   20.50
  -4   4   3  205.58    9.70
   4   4  -3  258.97   20.80
  -3  -4   3  564.44   28.90
  -3  -4   3  506.45   37.50
  -3  -4   3  563.44   30.50
  -3  -4   3  582.94   27.70
   3   4  -3  561.24   34.80
  -3   4   3  601.44   27.70
  -3   4   3  567.64   31.00
   3   4  -3  627.54   30.90
  -3   4   3  543.85   34.50
  -2  -4   3 3712.13  142.09
   2  -4  -3 3719.63  143.19
  -2  -4   3 3894.81  141.39
  -2  -4   3 3359.16  147.69
  -2   4   3 4118.39  139.59
   2   4  -3 3856.41  145.59
   2   4  -3 3722.63  143.19
  -2   4   3 3953.80  144.29
  -2   4   3 3855.01  143.69
   2   4  -3 3686.63  144.99
   1  -4  -3 1479.35   63.09
  -1  -4   3 1421.46   68.39
  -1  -4   3 1637.04   61.19
   1  -4  -3 1617.74   63.09
   1   4  -3 1571.84   65.59
   1   4  -3 1590.54   62.09
   1   4  -3 1555.24   63.39
  -1   4   3 1642.84   62.29
   0  -4  -3 2894.21   99.19
   0  -4   3 2708.13   96.19
   0  -4   3 2268.47  104.29
   0  -4  -3 2601.84   95.79
   0   4  -3 2626.24   95.89
   0   4  -3 2498.25  101.59
   0   4   3 2512.35   96.49
   0   4   3 2532.55   95.49
   0   4   3 2453.75  100.39
   0   4  -3 2652.53   96.19
   0   4  -3 2528.85   99.99
  -1  -4  -3 1541.55   59.69
   1  -4   3 1545.05   54.79
  -1   4  -3 1405.96   54.59
  -1   4  -3 1289.47   55.89
  -1   4  -3 1418.76   56.09
  -1   4  -3 1321.17   60.39
  -2  -4  -3   51.99   12.90
  -2  -4  -3   39.10    8.20
  -2   4  -3   52.49    8.70
  -2   4  -3   40.10    7.20
  -2   4  -3   45.00   13.90
  -2   4  -3   52.59   11.20
  -3  -4  -3   75.89   19.50
  -3  -4  -3   73.99   19.40
  -3  -4  -3  114.79   21.90
  -3   4  -3  131.49   24.10
  -3   4  -3   72.39   19.90
   4  -4   3   -7.00    5.90
   4  -4   3   -1.50    6.60
  -4  -4  -3   30.40   35.30
   4  -4   3   -4.50    6.60
   4  -4   3   -1.00    5.40
   4   4   3   -9.60    9.10
   4   4   3    6.10    5.70
   4   4   3   -7.40    8.00
   5  -4   3   93.69   11.30
   5  -4   3   87.59   12.40
   5  -4   3   80.99    9.80
   5  -4   3  101.69   10.70
   5  -4   3   96.09    9.90
   5   4   3   91.19   12.50
   5   4   3   67.39   10.90
   5   4   3   69.69    9.50
   5   4   3   77.29   12.40
   6  -4   3  659.83   29.90
   6  -4   3  653.03   28.50
   6  -4   3  644.64   29.40
   6  -4   3  677.63   29.20
   6   4   3  633.14   31.00
   6   4   3  682.63   29.80
   6   4   3  648.64   28.20
   7  -4   3  207.28   13.20
   7  -4   3  191.18   11.90
   7  -4   3  214.28   16.30
   7   4   3  203.78   13.40
   7   4   3  176.78   14.40
  -7   4  -3  183.78   11.10
   8  -4   3  148.39    9.40
   8  -4   3  135.99    8.70
   8   4   3  135.79   10.10
   8   4   3  136.19   10.40
  -8   4  -3  140.99    9.00
   9  -4   3  115.89    6.70
   9  -4   3  110.99    6.50
   9   4   3  111.19    7.20
   9   4   3  112.79    7.10
  10  -5  -3   46.10    6.90
  10  -5  -3   45.10    5.70
 -10  -5   3   41.10    4.90
 -10  -5   3   42.10    4.40
 -10   5   3   44.00    4.20
  10   5  -3   45.80    7.90
 -10   5   3   46.40    3.80
  10   5  -3   36.50    7.60
   9  -5  -3  288.07   17.30
  -9  -5   3  289.17   13.70
   9  -5  -3  336.57   16.60
   9  -5  -3  316.07   15.90
   9   5  -3  237.08   22.90
   9   5  -3  326.87   14.50
   9   5  -3  256.17   20.70
  -9   5   3  304.07   13.00
  -9   5   3  267.37   15.40
   9   5  -3  328.37   17.80
   8  -5  -3   39.70    9.10
  -8  -5   3   54.79    6.60
   8  -5  -3   52.59    9.10
  -8  -5   3   49.40    7.50
   8  -5  -3   49.90   10.00
   8  -5  -3   47.00    7.40
   8   5  -3   49.99   11.00
   8   5  -3   58.69    8.60
  -8   5   3   54.19    6.20
   8   5  -3   34.20    7.60
  -8   5   3   43.50    5.30
   8   5  -3   38.20    8.20
   8   5  -3   49.10    7.80
   7  -5  -3  137.19   11.60
   7  -5  -3  127.19   10.00
   7  -5  -3  145.79   11.40
  -7  -5   3  117.29   10.30
  -7  -5   3  134.29    9.00
   7  -5  -3  106.49   16.20
  -7   5   3  137.39    8.00
  -7   5   3  137.19    8.80
   7   5  -3  142.79   13.50
   7   5  -3  147.49   14.70
   7   5  -3  121.59   19.30
   7   5  -3  137.79   11.70
   7   5  -3  134.29   13.70
   6  -5  -3  257.97   16.00
  -6  -5   3  261.37   14.50
   6  -5  -3  269.17   14.20
  -6  -5   3  272.37   12.80
   6  -5  -3  260.07   14.90
  -6   5   3  267.47   13.00
   6   5  -3  220.88   25.60
   6   5  -3  265.87   15.70
   6   5  -3  268.67   17.90
   6   5  -3  238.08   19.00
  -6   5   3  265.67   11.90
   6   5  -3  255.47   15.30
  -5  -5   3  199.78   28.30
  -5  -5   3  177.18   29.90
  -5  -5   3  183.48    9.80
  -5  -5   3  180.48   29.00
  -5   5   3  161.88   24.80
  -5   5   3  181.08   28.20
  -5   5   3  195.98    9.10
  -4  -5   3  552.24   31.90
  -4  -5   3  586.84   22.60
  -4  -5   3  556.34   37.10
  -4  -5   3  578.04   31.80
  -4  -5   3  478.95   50.09
   4  -5  -3  488.35   35.70
   4   5  -3  620.04   33.40
  -4   5   3  588.34   22.00
  -4   5   3  556.64   39.10
  -4   5   3  567.44   32.80
  -3  -5   3  221.98   15.80
  -3  -5   3  206.88   18.90
  -3  -5   3  165.08   29.70
  -3  -5   3  199.98   16.90
   3   5  -3  232.68   19.30
  -3   5   3  201.78   25.90
  -3   5   3  214.48   16.20
  -3   5   3  197.28   20.20
  -2  -5   3 1344.87   53.29
  -2  -5   3 1283.37   53.79
   2  -5  -3 1287.77   55.99
  -2  -5   3 1149.58   61.59
  -2  -5   3 1372.66   53.29
   2   5  -3 1220.48   58.49
   2   5  -3 1349.36   57.59
  -2   5   3 1396.36   58.79
  -2   5   3 1383.26   51.19
   2   5  -3 1265.97   56.29
  -2   5   3 1468.15   57.89
   1  -5  -3 1502.05   61.49
  -1  -5   3 1393.56   69.49
  -1  -5   3 1576.64   60.79
   1  -5  -3 1554.24   63.79
  -1  -5   3 1694.73   59.79
   1   5  -3 1521.15   65.29
  -1   5   3 1426.96   60.89
  -1   5   3 1644.54   65.09
  -1   5   3 1586.84   62.39
   1   5  -3 1521.65   62.39
   1   5  -3 1606.64   64.29
   0  -5  -3 1311.57   52.09
   0  -5   3 1097.39   58.99
   0  -5   3 1311.97   53.19
   0  -5  -3 1197.48   48.40
   0   5  -3 1263.97   48.90
   0   5   3 1219.48   49.50
   0   5  -3 1244.08   54.39
   0   5   3 1188.78   55.09
   0   5   3 1207.98   48.50
   0   5  -3 1240.48   51.19
   0   5  -3 1277.87   48.60
  -1  -5  -3   10.40    3.00
   1  -5   3    1.10   15.30
  -1  -5  -3   25.10    8.30
   1  -5   3    4.10    5.70
  -1  -5  -3    8.30    5.10
  -1   5  -3   11.80    5.30
  -1   5  -3    3.50    7.70
  -1   5  -3   21.10    8.30
   1   5   3   -0.10    5.80
   1   5   3   13.00    6.10
  -2  -5  -3 3968.10  149.19
   2  -5   3 3267.47  152.58
  -2  -5  -3 3945.31  140.99
  -2   5  -3 3530.65  146.89
  -2   5  -3 4066.29  142.79
  -2   5  -3 3807.22  146.39
  -2   5  -3 3951.50  141.59
  -3  -5  -3   50.49   20.50
  -3  -5  -3   53.39   21.00
  -3  -5  -3   51.29   14.80
  -3   5  -3   46.30   15.30
  -3   5  -3   20.50   22.00
  -3   5  -3   41.40   12.50
   4  -5   3   31.50    7.30
   4  -5   3   34.60    5.90
   4  -5   3   45.80    7.60
   4  -5   3   43.60    8.90
   4   5   3   26.80    8.90
   4   5   3   17.40   10.20
   4   5   3   32.00    6.10
   5  -5   3   77.49    8.80
   5  -5   3   97.39   11.90
   5  -5   3   76.89   10.00
   5   5   3   69.09    9.00
   5   5   3   70.59   13.10
   5   5   3   68.19   12.70
   5   5   3   65.49   11.40
   6  -5   3   10.60    5.80
   6  -5   3   11.50    5.80
   6  -5   3   10.40    5.00
   6  -5   3    9.00    6.80
   6   5   3   13.70    6.90
   6   5   3    9.30    6.80
   6   5   3   11.40    5.20
   7  -5   3   73.29   12.70
   7  -5   3   65.99    8.80
   7  -5   3   68.39    7.60
   7   5   3   59.79    8.30
   7   5   3   68.89   11.20
   7   5   3   61.89   10.10
  -7   5  -3   71.59    7.60
   8  -5   3    2.20    3.10
   8  -5   3   -2.90    2.80
   8   5   3    1.00    3.90
  -8   5  -3    2.20    3.60
   8   5   3   -3.60    4.00
   9  -5   3  247.88   10.70
   9  -5   3  244.88   10.40
   9   5   3  226.58   11.30
  10  -6  -3    3.60    3.20
  10  -6  -3   -7.80    5.60
 -10  -6   3    0.00    2.60
 -10  -6   3    8.80    2.50
 -10   6   3    6.60    1.80
  10   6  -3    7.70    4.80
  10   6  -3    6.40    5.70
 -10   6   3    8.00    2.40
   9  -6  -3  118.59   10.60
  -9  -6   3  130.29    8.50
   9  -6  -3  135.09   10.80
   9  -6  -3  150.08    8.40
   9  -6  -3  171.48   18.70
  -9  -6   3  145.09    8.60
   9   6  -3  105.89   17.50
   9   6  -3  159.98   14.90
   9   6  -3  140.09    9.20
   9   6  -3  153.98   11.80
  -9   6   3  137.49    7.50
   9   6  -3  118.79   13.50
  -9   6   3  140.59    8.10
   8  -6  -3   67.59    9.10
   8  -6  -3   54.09    9.00
   8  -6  -3   66.59   14.30
  -8  -6   3   58.69    7.70
   8  -6  -3   65.59    7.50
  -8   6   3   54.69    5.80
   8   6  -3   53.09    9.30
   8   6  -3   41.00   10.70
   8   6  -3   58.09    8.70
   8   6  -3   71.39    9.10
  -7  -6   3   17.00    3.90
   7  -6  -3   24.30    6.30
   7  -6  -3   22.40    4.80
   7  -6  -3   20.70    5.40
  -7  -6   3   13.90    5.00
  -7   6   3   24.30    4.30
   7   6  -3    5.60    6.90
  -7   6   3   18.60    3.20
   7   6  -3   10.40    5.90
   7   6  -3   22.90    5.70
   7   6  -3   11.40    7.90
   6  -6  -3  341.57   18.90
   6  -6  -3  350.06   16.90
   6  -6  -3  365.76   17.70
  -6  -6   3  359.06   17.50
  -6  -6   3  369.06   16.10
   6   6  -3  351.96   18.90
   6   6  -3  372.26   20.40
  -6   6   3  362.26   15.10
  -6   6   3  353.26   15.90
   6   6  -3  307.67   26.00
   6   6  -3  351.06   22.40
   6   6  -3  354.56   18.20
  -5  -6   3  235.88   32.50
  -5  -6   3  235.58   31.40
  -5  -6   3  230.58   43.90
  -5  -6   3  231.98   11.60
  -5   6   3  274.77   42.20
  -5   6   3  270.17   38.90
  -5   6   3  242.88   10.80
  -4  -6   3   21.60   31.80
   4  -6  -3   33.00   17.10
  -4  -6   3   33.00   11.70
  -4  -6   3   18.30   15.00
  -4  -6   3   18.60    3.20
  -4  -6   3   12.60   12.10
  -4   6   3   28.40   14.30
  -4   6   3   -0.20   15.50
   4   6  -3   22.70   12.30
  -4   6   3   15.20    2.60
  -3  -6   3 1770.12   72.19
  -3  -6   3 1513.05   82.79
  -3  -6   3 1773.52   74.19
   3   6  -3 1945.91   75.49
  -3   6   3 1816.62   71.29
  -3   6   3 1810.82   75.49
  -2  -6   3 1112.69   61.59
  -2  -6   3 1308.47   50.99
  -2  -6   3 1220.38   50.89
   2  -6  -3 1169.18   53.79
   2   6  -3 1133.09   57.69
  -2   6   3 1265.57   48.10
  -2   6   3 1282.17   55.99
  -2   6   3 1233.78   53.49
   2   6  -3 1284.27   54.99
   1  -6  -3  890.81   41.60
   1  -6  -3  872.01   38.90
  -1  -6   3  902.81   37.60
  -1  -6   3 1010.00   37.70
   1   6  -3  877.01   37.50
   1   6  -3  822.52   42.40
   1   6  -3  868.91   42.10
  -1   6   3  887.11   39.50
   1   6  -3  830.32   40.30
   1   6  -3  785.82   38.60
  -1   6   3  985.20   44.20
   0  -6   3  223.68   14.30
   0  -6   3  213.08   30.30
   0  -6  -3  205.98   15.00
   0  -6  -3  237.78   17.90
   0   6   3  237.68   25.50
   0   6  -3  238.48   16.90
   0   6  -3  237.18   19.20
   0   6  -3  227.58   20.60
   0   6   3  193.48   16.10
   0   6   3  237.98   16.20
   0   6  -3  238.28   14.20
   0   6  -3  198.18   18.30
  -1  -6  -3 1689.83   66.29
   1  -6   3 1933.81   67.79
   1  -6   3 1605.54   81.19
  -1  -6  -3 1810.82   72.49
  -1   6  -3 1807.42   67.49
  -1   6  -3 1733.03   69.09
   1   6   3 1662.63   66.79
   1   6   3 1439.06   77.99
  -1   6  -3 1723.83   69.99
  -1   6  -3 1781.52   72.99
   2  -6   3  931.71   65.49
  -2  -6  -3 1086.99   43.70
  -2   6  -3 1116.79   54.69
  -2   6  -3 1110.59   50.09
  -2   6  -3 1093.29   46.50
  -2   6  -3 1144.59   51.09
  -3  -6  -3  150.68   24.00
  -3  -6  -3  202.88   36.00
  -3   6  -3  186.68   26.20
  -3   6  -3  235.08   28.40
  -3   6  -3  163.88   28.60
   4  -6   3  199.78   14.40
   4  -6   3  220.88   14.60
   4  -6   3  204.88   14.30
   4  -6   3  194.48   17.10
   4  -6   3  201.88   13.00
   4   6   3  204.48   14.80
   4   6   3  210.18   12.50
   4   6   3  223.78   17.80
   4   6   3  201.38   19.30
   5  -6   3  339.47   18.20
   5  -6   3  350.46   24.40
   5   6   3  316.47   20.10
   5   6   3  293.17   22.90
   5   6   3  309.67   16.30
   6  -6   3  398.16   19.00
   6  -6   3  412.06   20.30
   6  -6   3  400.36   20.00
   6  -6   3  403.56   20.20
   6   6   3  386.16   21.00
   6   6   3  373.06   18.70
  -6   6  -3  388.86   17.10
   6   6   3  348.37   22.20
   7  -6   3   20.40    4.20
   7  -6   3   34.50    6.60
   7  -6   3   26.50    5.40
   7   6   3   19.00    6.70
  -7   6  -3   23.00    4.00
   7   6   3   36.40    7.40
   7   6   3   24.50    5.80
   8  -6   3    8.00    3.00
   8  -6   3    8.50    3.10
   8   6   3   16.90    4.60
  -8   6  -3   10.30    3.70
   8   6   3   12.90    4.60
   9  -6   3  120.39    6.50
   9  -6   3  129.99    6.80
   9   6   3  114.79    7.40
 -10  -7   3   38.10    4.20
  10  -7  -3   55.59    5.50
  10  -7  -3   47.40    8.50
 -10  -7   3   42.00    4.80
  10   7  -3   57.59    8.00
 -10   7   3   40.00    4.40
  10   7  -3   40.90    8.40
 -10   7   3   46.90    3.40
  -9  -7   3   10.60    3.30
   9  -7  -3    9.50    4.20
  -9  -7   3    7.00    3.30
   9  -7  -3    4.70    4.70
   9   7  -3    4.50    6.00
   9   7  -3   10.60    4.20
   9   7  -3   10.70    5.50
  -9   7   3    6.00    2.60
   9   7  -3    6.90    5.70
   9   7  -3   14.70    9.30
  -9   7   3    8.70    2.50
  -8  -7   3    9.10    4.20
  -8  -7   3    6.70    3.70
   8  -7  -3    4.50    4.90
   8  -7  -3   11.70    5.60
   8  -7  -3    3.10    3.70
  -8   7   3    8.20    2.80
  -8   7   3    7.30    3.00
   8   7  -3    0.60    6.70
   8   7  -3    4.20    6.50
   8   7  -3    8.20    5.20
   8   7  -3   -4.50   10.00
  -7  -7   3  192.18   12.10
   7  -7  -3  192.48   13.40
   7  -7  -3  187.28   12.80
  -7  -7   3  211.68   11.20
   7  -7  -3  199.38   11.70
   7   7  -3  201.38   14.00
   7   7  -3  159.78   20.70
  -7   7   3  199.58    9.80
   7   7  -3  193.78   17.20
   7   7  -3  209.08   13.10
  -7   7   3  195.38   10.20
   7   7  -3  184.78   15.60
   6  -7  -3  157.08   11.90
  -6  -7   3  181.08   10.10
   6  -7  -3  153.98   10.90
  -6  -7   3  175.98   11.90
   6  -7  -3  183.28   13.40
   6  -7  -3  128.79   16.50
   6   7  -3  151.78   13.10
  -6   7   3  171.68    9.70
   6   7  -3  208.08   17.00
   6   7  -3  194.48   15.90
   6   7  -3  182.98   12.70
   5  -7  -3 1087.99   43.70
  -5  -7   3 1158.18   43.00
  -5  -7   3 1089.49   71.79
  -5  -7   3 1089.19   43.90
   5  -7  -3 1085.79   43.90
  -5  -7   3 1042.80   57.89
   5   7  -3 1058.79   45.30
   5   7  -3 1256.87   55.19
   5   7  -3 1135.39   44.90
  -5   7   3 1091.79   65.99
  -5   7   3 1130.79   42.60
   5   7  -3 1083.49   47.60
  -5   7   3 1304.97   70.09
   4  -7  -3  108.39    6.90
  -4  -7   3  103.29    7.30
  -4  -7   3  121.39   17.30
  -4  -7   3  136.19   27.20
  -4  -7   3  112.59   20.60
   4   7  -3  120.69   23.50
  -4   7   3   82.59   19.20
  -4   7   3  106.99    6.20
  -4   7   3  100.79   19.10
  -3  -7   3  846.22   42.20
  -3  -7   3  821.52   39.50
  -3  -7   3  817.82   38.50
   3   7  -3  920.31   43.60
  -3   7   3  812.92   38.70
  -3   7   3  799.32   43.80
  -2  -7   3 2053.89   79.29
  -2  -7   3 1890.61   77.99
   2  -7  -3 1749.72   80.59
  -2   7   3 2096.59   85.59
  -2   7   3 2068.79   75.29
  -2   7   3 1983.10   81.29
   2   7  -3 1998.00   82.49
   2   7  -3 1948.71   78.19
   1  -7  -3  756.62   39.50
   1  -7  -3  718.83   36.60
  -1  -7   3  798.72   34.80
  -1  -7   3  824.62   35.40
  -1   7   3  816.02   37.50
   1   7  -3  809.62   39.70
   1   7  -3  774.72   34.60
   1   7  -3  727.43   37.80
  -1   7   3  858.01   43.80
   1   7  -3  754.02   42.30
   0  -7  -3  328.37   22.70
   0  -7   3  321.77   18.70
   0  -7  -3  277.97   21.70
   0   7  -3  354.46   23.80
   0   7  -3  311.27   22.00
   0   7  -3  329.47   18.70
   0   7  -3  353.26   27.40
   0   7   3  363.26   33.60
  -1  -7  -3   31.30   10.90
  -1  -7  -3   21.50    9.60
   1  -7   3   25.80    8.40
  -1   7  -3   35.50   14.40
  -1   7  -3    9.00   11.20
  -1   7  -3   22.60    7.50
  -1   7  -3   20.80    9.70
   1   7   3   13.40    9.70
  -2  -7  -3  750.32   43.90
  -2  -7  -3  728.63   30.80
  -2   7  -3  674.83   46.40
  -2   7  -3  760.62   38.60
  -2   7  -3  700.03   39.60
  -3  -7  -3   56.99   25.60
  -3   7  -3   26.00   31.10
  -3   7  -3   34.60   16.90
   4  -7   3   85.69   11.00
   4  -7   3   72.59    8.80
   4  -7   3   95.79   18.00
   4  -7   3   74.19   13.50
   4  -7   3   79.99    9.90
   4  -7   3   76.49   10.90
   4   7   3   81.59   16.70
   4   7   3   78.19   10.80
  -4   7  -3   81.59    8.10
   4   7   3   89.99    8.90
   4   7   3   87.79   14.00
   5  -7   3   84.39    8.80
   5  -7   3   68.49   10.60
   5  -7   3   74.49   13.50
   5  -7   3   92.99   10.20
   5   7   3   72.49    8.60
  -5   7  -3   76.99    7.80
   5   7   3   65.79   13.70
   6  -7   3  469.95   22.00
   6  -7   3  429.76   21.80
   6  -7   3  427.86   22.90
   6  -7   3  450.45   21.90
   6   7   3  424.36   20.30
   6   7   3  447.56   25.40
   6   7   3  382.46   23.40
   6   7   3  430.96   24.90
  -6   7  -3  464.85   21.30
   7  -7   3  159.48   10.60
   7  -7   3  124.19   11.80
   7  -7   3  146.89   12.60
   7   7   3  114.79   13.80
  -7   7  -3  146.19    8.30
   7   7   3  134.49   10.60
   8  -7   3   66.79    5.90
   8  -7   3   76.09    6.30
   8  -7   3   67.29   11.00
   8   7   3   65.19    8.20
  -8   7  -3   68.99    6.20
   8   7   3   68.59    8.50
   9  -7   3   17.90    3.90
   9   7   3   17.50    3.50
 -10  -8   3   16.40    3.10
 -10  -8   3   16.70    2.60
  10  -8  -3   14.90    4.80
 -10   8   3   19.70    2.90
  10   8  -3   20.30    7.10
  -9  -8   3  171.28    9.60
   9  -8  -3  170.18   10.30
   9  -8  -3  183.68   10.70
  -9  -8   3  157.38    9.40
   9   8  -3  188.48   13.30
   9   8  -3  176.68    9.90
   9   8  -3  171.18   13.30
  -9   8   3  174.18    8.30
   9   8  -3  164.38   19.10
  -9   8   3  169.28    8.30
   9   8  -3  152.18   13.10
  -8  -8   3    7.70    3.50
  -8  -8   3   12.50    4.30
   8  -8  -3    4.60    3.40
   8  -8  -3   -0.80    4.80
   8  -8  -3    9.80    5.10
  -8   8   3    5.00    2.80
   8   8  -3   13.30    6.90
   8   8  -3    5.50    5.10
  -8   8   3    2.30    2.60
   8   8  -3   23.90   10.70
   8   8  -3   10.90    7.20
   7  -8  -3   36.40    6.10
  -7  -8   3   47.40    7.80
   7  -8  -3   39.30    6.80
   7  -8  -3   33.90    5.30
  -7  -8   3   40.20    6.70
  -7   8   3   41.50    5.30
   7   8  -3   39.60    7.20
   7   8  -3   36.30    9.30
   7   8  -3   31.50   12.30
  -7   8   3   41.70    4.90
   7   8  -3   34.60    8.10
   7   8  -3   39.90    6.70
   6  -8  -3  119.99    9.60
   6  -8  -3  136.19   10.80
  -6  -8   3  129.39    8.90
  -6  -8   3  130.69   10.80
   6  -8  -3   99.59   14.30
   6  -8  -3  142.19   12.40
   6   8  -3  113.19   19.30
   6   8  -3  115.49   11.30
  -6   8   3  144.79    8.20
   6   8  -3  142.59   15.10
   6   8  -3  120.19   12.60
   6   8  -3  166.18   15.60
  -6   8   3  137.99    7.40
  -5  -8   3   76.79   21.70
   5  -8  -3   87.19   10.10
  -5  -8   3   82.99    7.00
   5  -8  -3   77.19   12.90
   5  -8  -3   76.89    8.90
   5  -8  -3   72.89   11.70
  -5   8   3   87.19    7.00
   5   8  -3   60.39   11.10
   5   8  -3   96.39   16.20
   5   8  -3   83.79   12.50
   5   8  -3  109.59   17.50
  -5   8   3  122.79   32.60
  -5   8   3   92.49   32.90
   4  -8  -3  345.67   14.80
  -4  -8   3  309.17   28.50
  -4  -8   3  345.57   29.50
  -4  -8   3  386.96   37.60
  -4  -8   3  348.87   15.60
  -4   8   3  386.26   40.00
   4   8  -3  383.96   34.10
  -4   8   3  355.26   33.30
  -4   8   3  380.16   14.80
  -3  -8   3 1348.17   52.59
   3  -8  -3 1340.47   51.79
  -3  -8   3 1337.97   59.59
  -3  -8   3 1376.76   62.99
   3   8  -3 1326.77   60.19
  -3   8   3 1429.96   65.89
   3   8  -3 1488.65   65.49
  -3   8   3 1623.14   60.89
  -2  -8   3  530.35   28.70
  -2  -8   3  566.54   29.60
   2   8  -3  513.25   44.30
  -2   8   3  593.04   33.70
  -2   8   3  646.54   26.50
   2   8  -3  518.85   28.80
   1  -8  -3  763.42   41.10
  -1  -8   3  822.82   36.80
   1  -8  -3  724.13   38.10
  -1  -8   3  771.62   35.00
   1   8  -3  766.12   35.10
   1   8  -3  696.73   40.80
  -1   8   3  788.32   38.50
   1   8  -3  773.72   40.30
   1   8  -3  746.53   46.10
   0  -8   3  254.47   18.30
   0  -8  -3  272.27   22.00
   0  -8  -3  275.57   22.90
   0   8  -3  246.58   17.80
   0   8   3  267.17   21.30
   0   8  -3  250.57   31.10
   0   8  -3  269.97   23.80
   0   8  -3  249.88   24.30
  -1  -8  -3  195.38   40.20
   1  -8   3  273.87   20.60
  -1   8  -3  259.07   19.30
  -1   8  -3  256.47   34.00
   1   8   3  211.38   21.90
  -1   8  -3  255.37   28.10
  -2  -8  -3  247.28   30.80
  -2   8  -3  190.98   27.50
  -2   8  -3  188.18    9.70
  -2   8  -3  166.18   22.90
   3  -8   3   44.00    7.30
   3  -8   3   38.90    6.40
   3  -8   3   34.10    7.60
  -3  -8  -3   24.00   29.30
   3  -8   3   35.30    6.80
   3   8   3   39.10    6.00
  -3   8  -3   35.70   20.10
  -3   8  -3   36.90    6.10
   4  -8   3   86.59   10.60
   4  -8   3   91.59    9.40
   4  -8   3   86.99   10.70
   4  -8   3   61.69   12.90
   4  -8   3   84.09   16.60
   4  -8   3   91.29   10.10
   4   8   3   96.49   10.70
   4   8   3   65.79   12.40
  -4   8  -3   90.29    7.20
   4   8   3   83.69   14.20
   4   8   3   77.29    8.60
   5  -8   3   -3.80    4.60
   5  -8   3    5.00    6.00
   5  -8   3   -7.20   14.00
   5  -8   3    1.40    4.40
   5  -8   3   -0.60    5.20
   5   8   3  -11.60    8.90
   5   8   3   -9.60    8.10
  -5   8  -3    3.10    3.50
   5   8   3   -2.00    4.00
   5   8   3   -5.30    8.30
   6  -8   3  209.48   12.80
   6  -8   3  202.88   18.30
   6  -8   3  207.68   14.10
   6  -8   3  234.58   13.90
   6   8   3  209.68   16.30
   6   8   3  242.78   19.40
   6   8   3  216.98   12.80
  -6   8  -3  221.78   10.80
   6   8   3  194.78   16.70
   7  -8   3   33.90    6.10
   7  -8   3   24.70    5.80
   7  -8   3   20.60    4.60
   7  -8   3   20.10    5.80
   7   8   3   25.00    6.40
   7   8   3   25.50    5.20
  -7   8  -3   23.40    3.60
   7   8   3   19.30    7.20
   8  -8   3   50.19    5.50
   8  -8   3   42.10    5.10
   8  -8   3   40.10    9.60
   8   8   3   35.50    5.60
   8   8   3   39.60    7.40
  -8   8  -3   39.00    5.20
 -10  -9   3   31.00    3.60
  10  -9  -3   28.70    4.90
 -10  -9   3   24.90    4.80
  10   9  -3   33.50    7.00
   9  -9  -3   19.40    4.40
   9  -9  -3   26.10    4.40
  -9  -9   3   31.00    5.40
  -9  -9   3   32.40    5.30
  -9   9   3   26.00    3.50
   9   9  -3   19.90    5.90
   9   9  -3   24.90    4.40
   9   9  -3   29.40    9.50
  -9   9   3   18.60    2.90
   9   9  -3   28.50    6.70
  -8  -9   3  268.97   13.50
  -8  -9   3  252.97   13.10
   8  -9  -3  257.67   12.80
   8  -9  -3  251.17   14.20
   8  -9  -3  244.68   14.00
   8   9  -3  249.08   17.50
   8   9  -3  254.97   16.60
   8   9  -3  269.27   14.90
   8   9  -3  277.77   22.60
  -8   9   3  239.88   11.50
  -8   9   3  248.48   11.60
   7  -9  -3   26.20    4.80
   7  -9  -3   15.80   10.90
  -7  -9   3   32.40    5.60
   7  -9  -3   24.40    6.20
   7  -9  -3   26.70    5.30
  -7  -9   3   36.70    6.80
   7   9  -3   25.20    6.30
  -7   9   3   27.10    4.70
   7   9  -3   27.20    6.30
   7   9  -3   43.80   11.50
  -7   9   3   29.30    4.90
   7   9  -3   36.00    8.80
   7   9  -3   30.10    8.10
   6  -9  -3  126.99   10.60
   6  -9  -3  126.49    9.90
   6  -9  -3  130.09   12.00
  -6  -9   3  138.69    9.10
  -6  -9   3  129.19   10.70
   6  -9  -3  126.69   13.00
   6   9  -3  141.49   12.30
   6   9  -3  117.99   18.70
   6   9  -3  137.39   15.10
  -6   9   3  139.49    8.10
   6   9  -3  133.49   11.50
  -6   9   3  129.99    7.50
   6   9  -3  148.09   15.80
   5  -9  -3   75.39    9.50
   5  -9  -3   67.49   10.80
  -5  -9   3   71.59    9.90
   5  -9  -3   58.39    9.40
   5  -9  -3   53.29    7.30
  -5  -9   3   83.49    6.80
  -5   9   3   69.09    5.30
  -5   9   3   65.79   38.70
  -5   9   3   60.89    6.40
   5   9  -3   77.49   11.10
   5   9  -3   93.59   16.10
   5   9  -3   81.79   12.30
   5   9  -3   63.49   10.60
  -4  -9   3  900.01   56.59
   4  -9  -3  882.11   34.40
  -4  -9   3 1072.79   49.80
  -4  -9   3  874.31   48.20
  -4  -9   3  906.91   35.40
   4   9  -3  882.21   54.69
  -4   9   3  904.11   34.40
  -4   9   3  862.21   52.19
   4   9  -3  906.31   49.70
  -4   9   3  975.60   59.79
   3  -9  -3  106.29    6.10
  -3  -9   3  114.89   19.00
  -3  -9   3  115.09    7.50
   3   9  -3  155.98   24.30
   3   9  -3  106.89    7.60
  -3   9   3   95.99   19.70
  -3   9   3  102.49    6.50
   3   9  -3  105.99   15.50
  -3   9   3   92.89   15.80
  -2  -9   3 1545.75   64.39
   2  -9  -3 1442.46   54.99
  -2  -9   3 1449.55   62.59
   2   9  -3 1484.85   63.29
   2   9  -3 1439.86   55.39
   2   9  -3 1550.84   68.69
  -2   9   3 1492.15   59.59
  -2   9   3 1570.14   67.99
   1  -9  -3  747.23   44.20
  -1  -9   3  876.01   40.30
  -1  -9   3  789.62   37.30
   1   9  -3  830.32   37.70
  -1   9   3  877.21   42.80
   1   9  -3  800.42   43.20
   1   9  -3  729.93   47.40
   1   9  -3  745.63   30.20
   0  -9  -3  920.21   45.90
   0  -9   3  946.41   41.40
   0  -9  -3  912.61   48.30
   0   9  -3  864.01   55.99
   0   9  -3  768.02   49.90
   0   9  -3  943.31   50.29
   0   9  -3  878.61   33.80
   0   9   3  930.11   44.40
   0   9  -3  913.61   46.90
  -1  -9  -3   33.30   14.70
   1  -9   3   47.50   12.90
   1   9   3   39.70   14.80
  -1   9  -3   42.20   11.40
  -1   9  -3   51.99   22.20
  -1   9  -3   44.10   14.70
  -1   9  -3   40.80    4.80
  -2   9  -3  585.84   23.00
  -2   9  -3  598.94   37.30
  -2   9  -3  592.04   42.70
   3  -9   3  135.49   12.40
   3  -9   3  155.98   13.00
   3  -9   3  142.79   15.60
   3  -9   3  155.08   11.20
   3  -9   3  158.68   12.50
   3   9   3  152.28   11.70
  -3   9  -3  150.68   27.50
   3   9   3  119.09   17.40
  -3   9  -3  145.29    8.20
   3   9   3  165.98   10.70
   4  -9   3   61.69    9.50
   4  -9   3   67.09    8.50
   4  -9   3   68.89    9.70
   4  -9   3   64.59    9.00
   4  -9   3   47.40    7.20
   4   9   3   61.39    7.80
   4   9   3   52.39   10.40
   4   9   3   45.40    9.90
  -4   9  -3   55.89    5.90
   5  -9   3  114.69   10.30
   5  -9   3  101.69   16.30
   5  -9   3   86.19   11.00
   5  -9   3   75.89   13.60
   5  -9   3   99.49   10.50
   5  -9   3   94.29    9.20
   5   9   3  109.89    9.20
  -5   9  -3  102.09    7.20
   5   9   3   77.19   14.70
   5   9   3  106.89   17.30
   5   9   3  117.19   11.70
   6  -9   3  128.49   12.00
   6  -9   3  166.48   11.90
   6  -9   3  142.79   10.50
   6  -9   3  166.58   11.30
  -6   9  -3  146.19    8.50
   6   9   3  151.58   12.20
   6   9   3  158.28   14.20
   6   9   3  149.29   14.60
   7  -9   3   32.40    6.50
   7  -9   3   17.00    3.90
   7  -9   3   17.80    5.30
  -7  -9  -3   21.50    7.00
   7   9   3   21.20    5.90
   7   9   3   28.20    6.60
   7   9   3   22.30    4.80
   8  -9   3   46.50    5.00
   8  -9   3   51.39    5.00
   8  -9   3   58.49    9.10
   8   9   3   41.30    7.60
  -8   9  -3   44.00    5.00
   8   9   3   44.10    8.20
   8   9   3   34.60    6.00
 -10 -10   3  150.38    7.00
  10 -10  -3  150.68    9.40
  10  10  -3  150.98    9.50
   9 -10  -3  255.77   12.50
  -9 -10   3  249.48   11.90
  -9 -10   3  272.77   12.00
   9 -10  -3  262.27   12.70
   9  10  -3  276.37   15.20
   9  10  -3  241.58   11.80
   9  10  -3  250.97   14.90
  -9  10   3  224.18   11.20
   9  10  -3  238.08   14.80
   9  10  -3  215.18   18.70
  -8 -10   3   45.20    6.60
   8 -10  -3   38.40    7.70
  -8 -10   3   55.49    7.10
   8 -10  -3   49.30    7.70
  -8  10   3   56.29    4.80
   8  10  -3   49.90    6.80
   8  10  -3   48.70    8.20
  -8  10   3   40.80    6.10
  -7 -10   3   28.10    4.60
   7 -10  -3   39.90    8.10
  -7 -10   3   41.20    7.70
   7 -10  -3   32.50    5.20
   7 -10  -3   42.40    6.30
   7 -10  -3   34.20    6.20
   7  10  -3   30.20    9.10
   7  10  -3   36.10    6.10
  -7  10   3   29.10    4.70
  -7  10   3   33.60    4.60
   7  10  -3   31.80    8.20
   7  10  -3   32.90    6.80
   7  10  -3   40.80   10.80
   6 -10  -3  289.07   21.50
   6 -10  -3  349.27   18.00
  -6 -10   3  357.96   18.50
   6 -10  -3  354.86   19.10
  -6 -10   3  346.37   16.20
   6 -10  -3  330.87   18.50
  -6  10   3  359.76   14.60
   6  10  -3  338.07   18.10
   6  10  -3  385.46   32.10
   6  10  -3  296.47   24.70
   6  10  -3  336.97   22.50
   6  10  -3  306.67   23.80
  -6  10   3  360.96   15.10
   5 -10  -3   90.29   10.20
  -5 -10   3   82.49    7.10
   5 -10  -3   90.19    9.70
  -5 -10   3   66.79    9.50
   5 -10  -3   79.39   13.10
   5 -10  -3   85.09    9.20
   5  10  -3  120.49   16.00
   5  10  -3   85.69   12.10
   5  10  -3   94.59   10.90
  -5  10   3   86.99    6.40
  -5  10   3   73.99    5.60
   5  10  -3   63.29   11.50
  -4 -10   3  247.58   45.10
  -4 -10   3  285.37   13.00
  -4 -10   3  222.08   32.80
  -4 -10   3  277.57   15.00
   4 -10  -3  267.87   11.90
  -4 -10   3  242.98   33.00
   4 -10  -3  270.57   14.70
  -4  10   3  264.17   12.40
   4  10  -3  284.97   36.40
   4  10  -3  262.97   16.80
  -4  10   3  274.57   11.60
   4  10  -3  264.67   20.40
  -4  10   3  297.97   40.80
   4  10  -3  239.78   43.20
   4  10  -3  282.67   17.90
  -3 -10   3  197.18   10.20
  -3 -10   3  184.88   23.20
   3 -10  -3  196.38    8.90
  -3 -10   3  170.18   27.70
   3  10  -3  203.78   30.80
  -3  10   3  204.38    9.30
  -3  10   3  175.88   28.00
   3  10  -3  167.28   26.00
  -3  10   3  223.78   36.10
   3  10  -3  185.88   10.20
  -2 -10   3  444.66   30.20
  -2 -10   3  401.16   18.20
  -2 -10   3  427.96   37.60
   2 -10  -3  413.86   17.10
   2  10  -3  442.96   17.60
   2  10  -3  455.75   35.00
  -2  10   3  430.16   35.20
   2  10  -3  407.36   28.50
  -2  10   3  469.35   25.40
   1 -10  -3  399.66   16.20
  -1 -10   3  436.06   29.90
  -1 -10   3  387.26   25.60
   1 -10  -3  416.16   35.10
   1  10  -3  376.26   25.90
  -1  10   3  429.46   32.10
   1  10  -3  435.86   32.60
   1  10  -3  409.46   16.40
   1  10  -3  325.27   46.10
   0 -10  -3  209.88   27.20
   0 -10  -3  196.78    9.50
   0 -10   3  193.38   20.90
   0  10  -3  198.68    9.30
   0  10   3  210.58   27.60
   0  10  -3  236.38   19.80
   0  10  -3  228.48   27.30
   0  10  -3  171.78   41.40
  -1 -10  -3  121.69   29.10
  -1 -10  -3   92.49    7.00
   1 -10   3   74.79   16.60
  -1  10  -3  143.89   21.40
  -1  10  -3  102.39    6.10
  -1  10  -3  117.89   28.00
  -2 -10  -3  102.09    7.50
  -2 -10  -3  111.09   27.50
  -2  10  -3   77.69   19.70
  -2  10  -3   84.69    6.00
  -2  10  -3   67.49   23.70
   3 -10   3  488.65   22.40
   3 -10   3  448.86   22.60
   3 -10   3  452.75   24.30
   3 -10   3  511.45   22.60
   3 -10   3  501.25   21.80
  -3  10  -3  467.75   54.89
   3  10   3  510.45   22.20
   3  10   3  486.25   21.20
   3  10   3  413.06   26.60
   4 -10   3  314.17   17.10
   4 -10   3  303.37   16.30
   4 -10   3  294.27   16.30
   4 -10   3  313.07   19.60
   4 -10   3  306.47   15.80
   4  10   3  300.47   15.50
  -4  10  -3  312.97   13.40
   4  10   3  268.87   20.40
   4  10   3  318.27   16.40
   5 -10   3  195.38   12.00
   5 -10   3  187.18   17.60
   5 -10   3  227.08   13.30
   5 -10   3  167.78   16.10
   5 -10   3  185.48   13.00
   5 -10   3  200.38   14.10
   5  10   3  184.38   17.60
   5  10   3  215.48   13.80
  -5  10  -3  207.08   10.10
   5  10   3  187.08   19.20
   5  10   3  201.78   12.20
   6 -10   3   12.60    4.90
   6 -10   3   11.70    4.30
   6 -10   3   13.80    5.30
   6 -10   3   18.40    5.60
  -6 -10  -3    8.60    5.70
   6  10   3   13.70    4.50
   6  10   3   28.20    7.70
   6  10   3   17.10    6.80
  -6  10  -3   12.90    3.40
   7 -10   3   67.89    6.80
   7 -10   3   83.79    8.80
   7 -10   3   58.79    8.20
   7 -10   3   60.89    7.30
   7  10   3   59.69   10.70
  -7  10  -3   56.89    5.40
   7  10   3   63.79    7.50
   7  10   3   51.79   10.20
   8 -10   3   48.00    7.20
   8 -10   3   53.69    5.00
   8 -10   3   60.79    5.20
  -8  10  -3   51.49    5.20
   8  10   3   48.80    7.70
   8  10   3   45.00    7.10
  10 -11  -3   69.69    6.80
 -10 -11   3   70.19    4.40
  10  11  -3   68.39    7.20
   9 -11  -3   53.29    6.40
  -9 -11   3   52.09    5.40
  -9 -11   3   52.69    5.80
   9  11  -3   66.69    9.40
   9  11  -3   54.19    8.90
   9  11  -3   39.00   10.30
  -9  11   3   41.70    5.20
   9  11  -3   53.49    6.10
  -8 -11   3   38.80    6.30
   8 -11  -3   44.70    8.60
   8 -11  -3   31.70    5.40
  -8 -11   3   24.40    4.30
   8  11  -3   29.20    6.00
   8  11  -3   33.90    7.60
   8  11  -3   29.40    7.90
  -8  11   3   29.70    4.30
   8  11  -3   27.30   10.40
   7 -11  -3   15.30    5.70
   7 -11  -3    8.60    4.70
  -7 -11   3   13.00    4.20
   7 -11  -3   10.90    7.10
   7 -11  -3    9.30    3.90
  -7 -11   3    4.70    4.60
   7  11  -3   12.60   10.50
   7  11  -3   10.90   10.40
   7  11  -3   13.90    6.40
   7  11  -3   26.80    8.40
   7  11  -3   11.20    6.00
  -7  11   3    8.60    2.80
  -7  11   3   10.90    3.00
   6 -11  -3  166.98   11.30
   6 -11  -3  146.19   12.70
  -6 -11   3  148.59   11.10
   6 -11  -3  150.18   10.40
  -6 -11   3  173.78   10.20
   6 -11  -3  162.88   12.50
   6  11  -3  134.89   16.60
   6  11  -3  140.79   12.10
  -6  11   3  146.69    8.40
   6  11  -3  164.08   16.40
   6  11  -3  172.68   14.00
   6  11  -3  123.39   17.90
  -6  11   3  161.08    8.20
   5 -11  -3  177.58   12.50
  -5 -11   3  175.68   11.90
  -5 -11   3  175.78   10.30
   5 -11  -3  194.28   11.80
   5 -11  -3  169.88   12.00
   5 -11  -3  162.38   14.80
  -5  11   3  179.78    8.80
  -5  11   3  195.58    9.40
   5  11  -3  207.28   13.30
   5  11  -3  177.48   17.50
   5  11  -3  151.88   19.90
   5  11  -3  174.78   14.00
  -4 -11   3  121.49   10.40
  -4 -11   3  115.39    8.20
   4 -11  -3  119.09   10.50
   4 -11  -3  120.19   11.10
  -4 -11   3  114.09   24.40
   4 -11  -3  111.79   11.50
  -4 -11   3   91.79   33.40
   4 -11  -3  101.89    7.90
   4 -11  -3  111.29    7.40
   4  11  -3  120.39   13.80
   4  11  -3  106.69   16.10
  -4  11   3  125.29   37.40
   4  11  -3  125.29   12.80
   4  11  -3  139.79   29.00
  -4  11   3  125.99    6.90
   3 -11  -3    6.50    2.40
  -3 -11   3   18.60   15.00
  -3 -11   3    4.90    3.30
  -3 -11   3   10.50   20.00
  -3  11   3    1.30    3.00
   3  11  -3    6.40    3.80
  -3  11   3   23.00   23.60
   3  11  -3   -9.40   20.70
   3  11  -3   14.20   17.30
   2 -11  -3  862.51   32.90
  -2 -11   3  903.71   48.50
  -2 -11   3  834.32   43.90
  -2 -11   3  816.72   33.70
   2  11  -3  929.31   53.09
   2  11  -3  902.41   45.30
   2  11  -3  879.21   33.30
  -1 -11   3  286.27   30.60
  -1 -11   3  326.67   29.40
   1 -11  -3  293.87   12.40
   1 -11  -3  277.17   36.60
   1  11  -3  291.07   25.30
  -1  11   3  286.07   34.00
   1  11  -3  291.37   12.60
   1  11  -3  314.97   33.30
   0 -11  -3   94.59    6.00
   0 -11  -3   99.79   21.50
   0 -11   3   96.19   16.00
   0  11  -3   70.39   19.20
   0  11  -3  101.99   15.80
   0  11  -3   93.79    5.70
   0  11   3   94.39   21.90
   1 -11   3  516.45   38.20
  -1 -11  -3  542.95   21.60
  -1 -11  -3  522.85   58.49
  -1  11  -3  546.45   36.40
  -1  11  -3  560.34   21.60
  -1  11  -3  624.14   45.90
   2 -11   3  406.86   19.10
  -2 -11  -3  350.06   72.79
   2 -11   3  413.06   20.30
   2 -11   3  401.96   22.20
   2 -11   3  431.06   20.30
  -2 -11  -3  400.86   16.80
   2 -11   3  376.96   21.10
  -2  11  -3  422.16   48.90
   2  11   3  401.76   19.20
   2  11   3  439.16   19.80
  -2  11  -3  405.96   16.50
  -2  11  -3  426.26   43.60
   3 -11   3  118.89   10.40
   3 -11   3  138.49   14.10
   3 -11   3  120.99   10.80
   3 -11   3  111.19   12.00
   3 -11   3  135.69   11.30
  -3  11  -3  126.69    7.20
   3  11   3  132.09    9.70
   3  11   3  118.99   10.40
   3  11   3  105.79   16.80
   4 -11   3  371.16   18.40
  -4 -11  -3  367.96   17.10
   4 -11   3  357.96   18.20
   4 -11   3  354.46   18.80
   4 -11   3  368.36   18.80
  -4  11  -3  361.16   15.30
   4  11   3  301.57   24.30
   4  11   3  348.77   17.20
   5 -11   3  672.93   31.50
   5 -11   3  627.24   31.40
   5 -11   3  738.83   30.10
   5 -11   3  694.63   29.50
   5 -11   3  671.03   30.10
   5 -11   3  731.13   29.10
  -5  11  -3  729.73   26.90
   5  11   3  667.13   28.60
   5  11   3  585.44   38.40
   5  11   3  634.64   33.70
   5  11   3  726.03   29.40
   6 -11   3   34.30    6.90
   6 -11   3   44.60    6.90
   6 -11   3   44.50    8.00
   6 -11   3   45.20    7.80
  -6 -11  -3   31.10    5.90
   6  11   3   37.20    7.30
  -6  11  -3   40.80    5.30
   6  11   3   41.30    9.20
   7 -11   3   39.40    7.40
  -7 -11  -3   36.60    6.20
   7 -11   3   46.90    6.10
   7 -11   3   48.10    5.80
  -7  11  -3   35.30    4.70
   7  11   3   49.90    6.50
   7  11   3   49.30   10.50
   7  11   3   41.50    9.90
   8 -11   3   30.10    4.50
   8 -11   3   33.60    6.30
   8 -11   3   34.60    4.50
   8  11   3   20.40    4.70
 -10 -12   3   49.00    3.40
  10  12  -3   48.10    6.70
   9 -12  -3    5.10    4.40
   9 -12  -3    5.30    3.60
  -9 -12   3    1.80    3.10
  -9 -12   3    7.80    2.80
  -9  12   3    2.00    2.90
   9  12  -3    6.20    9.10
   9  12  -3    9.80    5.10
   9  12  -3    5.70    4.90
  -8 -12   3   44.40    6.40
   8 -12  -3   35.50    7.50
  -8 -12   3   55.29    8.10
   8 -12  -3   50.39    7.70
   8  12  -3   42.90   10.60
  -8  12   3   42.00    4.80
   8  12  -3   50.39   12.70
   8  12  -3   51.59    8.60
   7 -12  -3  372.16   19.20
  -7 -12   3  365.16   16.90
   7 -12  -3  371.56   17.70
   7 -12  -3  365.16   17.90
  -7 -12   3  347.67   17.10
   7  12  -3  358.66   19.10
   7  12  -3  340.87   24.20
   7  12  -3  344.87   22.20
   7  12  -3  336.87   18.10
  -7  12   3  368.36   15.20
   7  12  -3  364.96   20.80
[truncated: 577,131 more chars]
